# Supplementary material for: Somatic memory of exogenous brassinosteroids alters histone expression and tempers heat responses
Source: Research Square preprint supplement (doi:10.21203/rs.3.rs-6702370/v1), 2025-06-05
Supplement: Supplementary file 1 [file b1285f4dda9912d383bdfe69.xlsx]

## Sheet: Table S1
Table S1. Samples collected for RNA-seq
Sample ID	BR application	Treatment	Time (hours post-heat)	Replicate	Notes
CN01	Mock	No heat	0	1
CN02	Mock	No heat	0	2
CN03	Mock	No heat	0	3
CN81	Mock	No heat	8	1
CN82	Mock	No heat	8	2
CN83	Mock	No heat	8	3
CN161	Mock	No heat	16	1
CN162	Mock	No heat	16	2
CN163	Mock	No heat	16	3
CN241	Mock	No heat	24	1
CN242	Mock	No heat	24	2
CN243	Mock	No heat	24	3
CY01	Mock	Heat	0	1
CY02	Mock	Heat	0	2
CY03	Mock	Heat	0	3	outlier; removed from analyses
CY81	Mock	Heat	8	1
CY82	Mock	Heat	8	2
CY83	Mock	Heat	8	3
CY161	Mock	Heat	16	1
CY162	Mock	Heat	16	2
CY163	Mock	Heat	16	3
CY241	Mock	Heat	24	1
CY242	Mock	Heat	24	2
CY243	Mock	Heat	24	3
SN01	Seed soak	No heat	0	1
SN02	Seed soak	No heat	0	2
SN03	Seed soak	No heat	0	3
SN81	Seed soak	No heat	8	1
SN82	Seed soak	No heat	8	2
SN83	Seed soak	No heat	8	3
SN161	Seed soak	No heat	16	1
SN162	Seed soak	No heat	16	2
SN163	Seed soak	No heat	16	3
SN241	Seed soak	No heat	24	1
SN242	Seed soak	No heat	24	2
SN243	Seed soak	No heat	24	3
SY01	Seed soak	Heat	0	1
SY02	Seed soak	Heat	0	2
SY03	Seed soak	Heat	0	3
SY81	Seed soak	Heat	8	1
SY82	Seed soak	Heat	8	2
SY83	Seed soak	Heat	8	3
SY161	Seed soak	Heat	16	1
SY162	Seed soak	Heat	16	2
SY163	Seed soak	Heat	16	3
SY241	Seed soak	Heat	24	1
SY242	Seed soak	Heat	24	2
SY243	Seed soak	Heat	24	3

## Sheet: Table S2
Table S2. ANOVA results for agronomic traits
	22 degrees, 3 genotypes
	Spike number	Grain number	Spike length	Spikelet number	Plant height	Thousand grain weight	Seed weight per plant
Replicate	***	***		**	***	***	***
Genotype	***	***	***	***	***	**	**
Treatment		.
Genotype:Treatment
	22 degrees and 29 degrees, 1 genotype
	Spike number	Grain number	Spike length	Spikelet number	Plant height	Thousand grain weight	Seed weight per plant
Replicate		***	***	***	ND	ND	ND
Stress		***	***	***	ND	ND	ND
Treatment			*	*	ND	ND	ND
Stress:Treatment				.	ND	ND	ND
ND: not determined; Significance indicated by *** < 0.001, ** < 0.01, * < 0.05, ‘.’< 0.1

## Sheet: Table S3
Table S3. Main effect heat DEGs due to heat at any time point, including both mock and BR seed soak
GeneID	baseMean	log2FoldChange	log2FoldChange SE	stat	p-value	p-adjusted
TraesCS3B02G022900	1103.33	-1.10182	0.0509905	-21.6083	1.5018e-103	9.2553e-99
TraesCS7A02G152800	1381.11	0.837489	0.0388303	21.5679	3.59356e-103	1.10732e-98
TraesCS7A02G451100	118.076	2.99474	0.147868	20.2527	3.3613e-91	6.905e-87
TraesCS4B02G187600	507.323	1.8699	0.0972498	19.2278	2.16439e-82	3.33468e-78
TraesCS4A02G116800	368.8	1.72527	0.0908887	18.9822	2.39319e-80	2.94975e-76
TraesCS3B02G427600	277.802	1.38841	0.0765012	18.1489	1.31083e-73	1.3464e-69
TraesCS3B02G308100	235.21	1.61821	0.0892213	18.137	1.62529e-73	1.4309e-69
TraesCS1A02G229900	216.178	1.33829	0.0742398	18.0266	1.20536e-72	9.2855e-69
TraesCS7B02G149200	6115.26	1.22206	0.068671	17.7959	7.60851e-71	5.20997e-67
TraesCS3A02G022600	1176.76	-1.0691	0.060269	-17.7387	2.10585e-70	1.29779e-66
TraesCS4D02G022700	1071.1	0.764126	0.0431399	17.7127	3.34489e-70	1.87399e-66
TraesCS6D02G295500	102.787	3.57864	0.202593	17.6642	7.9122e-70	4.06344e-66
TraesCS4A02G289300	488.941	1.02565	0.0601743	17.0447	3.82685e-65	1.81416e-61
TraesCS3A02G274400	518.115	1.25846	0.0758125	16.5997	7.00522e-62	3.0837e-58
TraesCS4D02G213300	140.49	1.35039	0.0822318	16.4217	1.33735e-60	5.49456e-57
TraesCS1B02G244200	377.855	1.02711	0.0631599	16.262	1.83509e-59	7.06832e-56
TraesCS7A02G242200	4744.24	1.22148	0.0759186	16.0893	3.03003e-58	1.09844e-54
TraesCS1D02G232100	257.787	0.995535	0.064159	15.5167	2.675e-54	9.15862e-51
TraesCS6B02G344900	2611.73	-0.414723	0.0267971	-15.4764	5.00598e-54	1.62373e-50
TraesCS4D02G189000	893.398	1.31676	0.0853235	15.4325	9.8894e-54	3.04732e-50
TraesCSU02G104300	1553.11	0.607715	0.0393893	15.4284	1.05427e-53	3.09393e-50
TraesCS3D02G273600	575.448	1.55019	0.100834	15.3737	2.45893e-53	6.58865e-50
TraesCSU02G166900	402.265	0.874681	0.0568856	15.3761	2.36691e-53	6.58865e-50
TraesCS2A02G386800	329.616	1.74641	0.114023	15.3164	5.94578e-53	1.52678e-49
TraesCS1D02G332500	1315.3	-0.697977	0.0459172	-15.2008	3.49389e-52	8.61286e-49
TraesCS5D02G177900	351.98	0.933033	0.0614433	15.1853	4.42686e-52	1.0493e-48
TraesCS7D02G440200	301.169	1.22893	0.0813737	15.1023	1.56305e-51	3.56769e-48
TraesCS1D02G158700	215.848	1.44021	0.0955241	15.0769	2.29863e-51	5.05929e-48
TraesCS3D02G293700	1015.19	0.607214	0.0404648	15.006	6.70764e-51	1.42544e-47
TraesCS1A02G165500	1811.83	-0.473741	0.0319474	-14.8288	9.54143e-50	1.96006e-46
TraesCS4D02G057000	28415.1	0.470007	0.0317137	14.8203	1.08273e-49	2.15246e-46
TraesCS1A02G295600	205.153	2.07583	0.140813	14.7418	3.4738e-49	6.6901e-46
TraesCS6D02G322200	1054.03	1.04267	0.071362	14.6111	2.38747e-48	4.45863e-45
TraesCS6A02G341900	1177.94	1.00237	0.0688323	14.5625	4.86602e-48	8.8201e-45
TraesCS6B02G346700	188.825	3.08452	0.21294	14.4854	1.49928e-47	2.63994e-44
TraesCS7B02G056600	1292.59	0.60781	0.0422186	14.3967	5.42596e-47	9.28865e-44
TraesCS2D02G300500	1241.91	-0.546735	0.0381217	-14.3418	1.19846e-46	1.99346e-43
TraesCS7A02G292000	747.571	-0.749617	0.0522743	-14.3401	1.22917e-46	1.99346e-43
TraesCS2A02G366000	945.877	1.11239	0.0778859	14.2823	2.82206e-46	4.45943e-43
TraesCS4B02G025600	640.701	0.73314	0.0516696	14.189	1.0718e-45	1.65133e-42
TraesCS2D02G160400	332.045	0.941842	0.0671781	14.0201	1.17484e-44	1.76592e-41
TraesCS7D02G284400	5817.5	-0.521702	0.0373817	-13.9561	2.88824e-44	4.23801e-41
TraesCS1B02G294400	2518.08	0.729061	0.0522837	13.9443	3.40705e-44	4.88301e-41
TraesCS7B02G213600	354.524	0.785425	0.0564599	13.9112	5.41687e-44	7.58707e-41
TraesCS4A02G257800	32201.9	0.420056	0.0302076	13.9056	5.85679e-44	8.02093e-41
TraesCS1B02G343700	930.246	-0.713696	0.051635	-13.8219	1.87959e-43	2.51816e-40
TraesCS4A02G092100	154.255	1.42617	0.103374	13.7962	2.6879e-43	3.52447e-40
TraesCS4B02G021300	329.803	-0.801008	0.0581647	-13.7714	3.78982e-43	4.86582e-40
TraesCS1B02G221400	735.798	-0.807109	0.0586336	-13.7653	4.12148e-43	5.18365e-40
TraesCS1A02G099400	972.312	-0.513556	0.0373546	-13.7481	5.22803e-43	6.44386e-40
TraesCS7B02G351000	87.7592	2.09608	0.153624	13.6443	2.18426e-42	2.63944e-39
TraesCS5B02G087700	57492.4	0.92631	0.068034	13.6154	3.24324e-42	3.84374e-39
TraesCS1D02G284200	2106.01	0.642966	0.0472757	13.6003	3.98589e-42	4.63476e-39
TraesCS4B02G144200	16057.7	0.541191	0.0398743	13.5724	5.83515e-42	6.65942e-39
TraesCS7D02G241100	9300.65	0.846385	0.0627415	13.49	1.79015e-41	2.00588e-38
TraesCS3B02G004700	1180.68	0.579335	0.0429845	13.4778	2.11421e-41	2.32669e-38
TraesCS6B02G205100	266.087	0.837558	0.0624587	13.4098	5.29889e-41	5.72912e-38
TraesCS7A02G326800	1731.35	-0.473432	0.0354859	-13.3414	1.32942e-40	1.41258e-37
TraesCS5B02G053500	1416.35	-0.481853	0.0361997	-13.311	1.99834e-40	2.08735e-37
TraesCS6B02G374100	150.778	2.95887	0.224645	13.1713	1.28398e-39	1.31881e-36
TraesCS7B02G130500	461.199	-0.593365	0.0455915	-13.0148	1.00794e-38	1.01832e-35
TraesCS6A02G316200	236.731	2.9911	0.230352	12.9849	1.49024e-38	1.4813e-35
TraesCS2D02G033200	25.1283	4.0972	0.317623	12.8996	4.52674e-38	4.42816e-35
TraesCS3B02G312700	354.676	-0.630704	0.0490035	-12.8706	6.58895e-38	6.34475e-35
TraesCS3D02G230300	492.421	-0.758167	0.058963	-12.8584	7.71941e-38	7.31895e-35
TraesCSU02G116400	479.704	1.26854	0.099133	12.7964	1.71801e-37	1.6042e-34
TraesCS3A02G222500	348.109	-0.788093	0.0624536	-12.6189	1.66211e-36	1.52884e-33
TraesCS2A02G543000	737.293	0.690361	0.0548466	12.5871	2.48518e-36	2.2523e-33
TraesCS6D02G209600	273.306	0.768201	0.0611088	12.571	3.04704e-36	2.72149e-33
TraesCS5D02G509800	3223.74	-0.621722	0.049775	-12.4907	8.3954e-36	7.39131e-33
TraesCSU02G080700	3521.87	-0.313874	0.0254192	-12.3479	4.99909e-35	4.33921e-32
TraesCS5A02G400800	256.139	0.952059	0.0771179	12.3455	5.15161e-35	4.40949e-32
TraesCS3B02G301800	897.419	0.477109	0.0388324	12.2864	1.07207e-34	9.05064e-32
TraesCS4B02G056700	36064.2	0.374666	0.0306162	12.2375	1.96021e-34	1.63248e-31
TraesCS2B02G294500	198.31	2.81858	0.230371	12.235	2.02112e-34	1.66077e-31
TraesCS3B02G019900	1147.8	0.822382	0.0673253	12.2151	2.58332e-34	2.0948e-31
TraesCS3B02G044400	285.721	1.32302	0.10875	12.1657	4.73247e-34	3.7877e-31
TraesCS4A02G072100	850.278	-0.621894	0.0512098	-12.1441	6.16916e-34	4.87427e-31
TraesCS1D02G139100	1280.65	-0.445121	0.036657	-12.1429	6.25967e-34	4.88318e-31
TraesCS1D02G245200	846.026	0.483486	0.03991	12.1144	8.86035e-34	6.82557e-31
TraesCS4D02G140800	19957.5	0.832831	0.0691796	12.0387	2.22523e-33	1.69304e-30
TraesCS6B02G373800	1508.3	0.711387	0.0591187	12.0332	2.378e-33	1.78721e-30
TraesCS3B02G130300	19.1821	4.55102	0.380831	11.9502	6.47345e-33	4.80658e-30
TraesCS5B02G563900	3805.01	0.474337	0.0397537	11.9319	8.06996e-33	5.92066e-30
TraesCS6A02G202800	677.767	-0.458005	0.0384129	-11.9232	8.95836e-33	6.49513e-30
TraesCS5D02G486100	1195.08	-0.413425	0.0347055	-11.9124	1.02015e-32	7.31042e-30
TraesCS5D02G480800	1647.78	-0.453363	0.0381277	-11.8907	1.3234e-32	9.37452e-30
TraesCS2D02G087900	3553.58	-0.314694	0.0268638	-11.7144	1.07502e-31	7.52853e-29
TraesCS3A02G006400	583.987	0.917756	0.0786994	11.6615	2.00371e-31	1.38747e-28
TraesCS5A02G479300	36354.7	-0.417499	0.0358142	-11.6574	2.10451e-31	1.44108e-28
TraesCS4D02G000500	189.954	1.21027	0.104152	11.6202	3.25513e-31	2.20447e-28
TraesCS1A02G161900	524.84	0.727443	0.062767	11.5896	4.65436e-31	3.05147e-28
TraesCS2A02G155100	297.297	0.819574	0.0707125	11.5902	4.61897e-31	3.05147e-28
TraesCS5B02G560200	569.45	0.641333	0.0553297	11.5911	4.57059e-31	3.05147e-28
TraesCS2D02G383600	1086.83	0.781859	0.0677755	11.536	8.68489e-31	5.63402e-28
TraesCS6D02G364400	221.118	1.1052	0.0963621	11.4692	1.88395e-30	1.20942e-27
TraesCS6B02G228100	1623.17	-0.351749	0.0308442	-11.4041	3.99072e-30	2.53547e-27
TraesCS4A02G134300	1387.64	0.816627	0.0717661	11.379	5.32075e-30	3.34599e-27
TraesCS3A02G113100	32.4151	4.60985	0.405603	11.3654	6.21571e-30	3.86931e-27
TraesCS3D02G023900	1764.75	-0.968085	0.0852993	-11.3493	7.47834e-30	4.60875e-27
TraesCS4B02G164400	770.02	-0.571778	0.0507399	-11.2688	1.87096e-29	1.14162e-26
TraesCS7B02G183600	8547.36	-0.548539	0.0487392	-11.2546	2.19913e-29	1.32871e-26
TraesCS4D02G212300	135.931	1.17398	0.104582	11.2255	3.05601e-29	1.82851e-26
TraesCS7A02G330300	758.582	0.556038	0.0495679	11.2177	3.33857e-29	1.97836e-26
TraesCS3A02G398300	891.464	-0.390251	0.03494	-11.1692	5.76995e-29	3.38658e-26
TraesCS5A02G467700	1396.52	-0.384112	0.034492	-11.1362	8.35663e-29	4.85851e-26
TraesCS4A02G149200	654.95	-0.494949	0.0444696	-11.1301	8.95663e-29	5.15869e-26
TraesCS3A02G318300	468.442	-0.771096	0.0697589	-11.0537	2.1028e-28	1.19992e-25
TraesCS3A02G260000	30.1226	2.29642	0.207845	11.0487	2.22409e-28	1.25749e-25
TraesCS1A02G392400	939.22	-0.445195	0.0403153	-11.0428	2.37483e-28	1.33051e-25
TraesCS1A02G443400	2355.12	-0.388443	0.0353123	-11.0002	3.81219e-28	2.11656e-25
TraesCS3D02G115300	22.3551	2.75558	0.250593	10.9963	3.9831e-28	2.1917e-25
TraesCS1A02G130800	1392	-0.423603	0.0385348	-10.9927	4.14135e-28	2.25861e-25
TraesCS3D02G159100	3282.53	-0.545258	0.0497412	-10.9619	5.82694e-28	3.15002e-25
TraesCS5D02G276600	197.247	0.749167	0.0683708	10.9574	6.12317e-28	3.28138e-25
TraesCS3D02G393200	353.331	0.57575	0.0525543	10.9553	6.26506e-28	3.32847e-25
TraesCS7B02G382200	1899.74	0.765461	0.0698786	10.9542	6.34618e-28	3.34275e-25
TraesCS7D02G309600	529.888	0.555612	0.0508711	10.922	9.05282e-28	4.72803e-25
TraesCS1A02G285200	1118.84	0.537711	0.0492542	10.9171	9.55447e-28	4.94809e-25
TraesCS2D02G194200	655.877	-0.49151	0.0451472	-10.8868	1.33224e-27	6.84192e-25
TraesCS6D02G257600	123.002	0.835084	0.0768398	10.8679	1.64006e-27	8.28722e-25
TraesCS7B02G063000	1132.52	-1.04668	0.0963097	-10.8678	1.64055e-27	8.28722e-25
TraesCS3D02G128800	1647.66	-0.404045	0.0372054	-10.8598	1.79053e-27	8.97131e-25
TraesCS3B02G147000	1670.23	-0.402655	0.0371876	-10.8277	2.54527e-27	1.25652e-24
TraesCS5D02G142100	852.234	-0.308081	0.0284534	-10.8276	2.5486e-27	1.25652e-24
TraesCS2A02G090000	3276.5	-0.311969	0.0288269	-10.8222	2.70294e-27	1.32204e-24
TraesCS4A02G091300	869.852	1.12443	0.104066	10.805	3.25945e-27	1.58168e-24
TraesCS6D02G185500	1212.88	-0.386798	0.0358239	-10.7972	3.54903e-27	1.70875e-24
TraesCS4D02G155900	2851.57	-0.29616	0.0274803	-10.7772	4.41222e-27	2.10788e-24
TraesCS2A02G171800	5040.67	-0.445655	0.0414271	-10.7576	5.45951e-27	2.58814e-24
TraesCS7A02G291600	5990.89	-0.424579	0.0395519	-10.7347	6.99358e-27	3.29008e-24
TraesCS2B02G204200	335.035	-0.601797	0.0560696	-10.733	7.12163e-27	3.32494e-24
TraesCS5B02G061400	1243.31	-0.536359	0.050104	-10.7049	9.6523e-27	4.47257e-24
TraesCS1B02G079000	2429.58	0.73446	0.0686631	10.6966	1.0561e-26	4.85713e-24
TraesCS6D02G332200	305.643	-0.594667	0.0557441	-10.6678	1.44013e-26	6.57425e-24
TraesCS4D02G081800	463.866	0.528129	0.0495157	10.6659	1.47001e-26	6.66132e-24
TraesCS5A02G437900	177.179	0.89938	0.084373	10.6596	1.5732e-26	7.07689e-24
TraesCS1A02G361900	3863.35	-0.6847	0.0642436	-10.6579	1.60243e-26	7.15613e-24
TraesCS6B02G045800	1414.91	-0.318063	0.0299418	-10.6227	2.3375e-26	1.03637e-23
TraesCS1B02G154800	525.554	-0.406713	0.0383995	-10.5916	3.2589e-26	1.43457e-23
TraesCS7B02G006800	824.003	0.555599	0.0524738	10.5881	3.38358e-26	1.47889e-23
TraesCS5A02G118800	385.037	-0.638818	0.0603699	-10.5817	3.62183e-26	1.57188e-23
TraesCS4A02G368400	72.8142	1.09503	0.103686	10.5611	4.51561e-26	1.94607e-23
TraesCS5D02G165300	390.309	-0.479887	0.045483	-10.5509	5.02965e-26	2.15255e-23
TraesCS5D02G364800	760.533	-0.345234	0.0327814	-10.5314	6.1912e-26	2.63139e-23
TraesCS4A02G199600	1463.22	0.454419	0.0431619	10.5282	6.40188e-26	2.7023e-23
TraesCS5B02G111300	1495.39	-0.378329	0.0359644	-10.5196	7.02016e-26	2.94312e-23
TraesCS4D02G296900	56.7921	1.15842	0.11017	10.5148	7.38077e-26	3.07339e-23
TraesCS2B02G180200	101.404	1.10831	0.105443	10.5109	7.69173e-26	3.18138e-23
TraesCS5D02G323400	318.795	-0.703726	0.0669579	-10.51	7.77146e-26	3.19293e-23
TraesCS1B02G294300	1551.94	2.01149	0.191626	10.4969	8.92236e-26	3.6415e-23
TraesCS2A02G126100	160.549	1.28071	0.122704	10.4373	1.67471e-25	6.79007e-23
TraesCS6B02G376500	2136.68	-0.346538	0.0332063	-10.4359	1.69958e-25	6.84586e-23
TraesCS5A02G267500	1013.29	0.634064	0.06078	10.4321	1.76896e-25	7.07904e-23
TraesCS5B02G204000	1999.72	-0.296626	0.0284859	-10.4131	2.16124e-25	8.59311e-23
TraesCS4A02G079500	1164.92	0.371894	0.0357386	10.4059	2.32925e-25	9.20172e-23
TraesCS4A02G316900	1374.26	0.738069	0.0710236	10.3919	2.6996e-25	1.05969e-22
TraesCS1B02G178500	33.8499	1.97928	0.190482	10.3909	2.72787e-25	1.06401e-22
TraesCS5A02G317100	506.389	-0.670435	0.0646639	-10.368	3.4669e-25	1.34376e-22
TraesCS3A02G196700	591.977	-0.486392	0.0469407	-10.3618	3.69788e-25	1.42433e-22
TraesCS4D02G145400	35175.5	0.433373	0.0418882	10.3459	4.36567e-25	1.6711e-22
TraesCS5D02G275300	1759.08	0.533812	0.0516039	10.3444	4.437e-25	1.68792e-22
TraesCS4D02G152600	735.83	-0.459331	0.0444075	-10.3435	4.47661e-25	1.69254e-22
TraesCS2B02G374700	12496.3	0.525407	0.0508012	10.3424	4.52999e-25	1.70228e-22
TraesCS1A02G285000	4354.96	1.83083	0.177118	10.3367	4.80567e-25	1.79493e-22
TraesCS7D02G327100	853.927	0.63855	0.0618672	10.3213	5.64526e-25	2.09582e-22
TraesCS2B02G404400	626.222	0.880584	0.0854037	10.3108	6.29453e-25	2.32287e-22
TraesCS4A02G396100	218.951	0.541819	0.0525731	10.306	6.61952e-25	2.42826e-22
TraesCS5D02G327300	1246.06	-0.408205	0.0396974	-10.2829	8.41282e-25	3.06784e-22
TraesCS5B02G509700	7688.04	-0.368129	0.0358412	-10.2711	9.50987e-25	3.44749e-22
TraesCS6A02G282200	22293.4	-0.244962	0.0239043	-10.2476	1.21316e-24	4.37221e-22
TraesCS2B02G326300	1334.22	-0.459021	0.0448209	-10.2412	1.29582e-24	4.64294e-22
TraesCS4D02G273200	7713.02	0.515601	0.05041	10.2281	1.48328e-24	5.28389e-22
TraesCS4B02G390500	304.09	0.572	0.0560386	10.2073	1.83997e-24	6.51689e-22
TraesCS6B02G093700	216.074	0.740143	0.0725552	10.2011	1.96039e-24	6.90371e-22
TraesCS5A02G320600	1132.3	-0.410288	0.0402927	-10.1827	2.36938e-24	8.29659e-22
TraesCS3A02G152000	2978.3	0.577531	0.0567284	10.1806	2.42013e-24	8.42642e-22
TraesCS6D02G326400	3591.81	-0.290183	0.0285955	-10.1479	3.38663e-24	1.17254e-21
TraesCS7D02G323600	1724.29	-0.372515	0.0367198	-10.1448	3.49449e-24	1.20312e-21
TraesCS6B02G418400	473.49	0.49733	0.0490793	10.1332	3.93578e-24	1.34752e-21
TraesCS3B02G010300	135.654	0.707139	0.07023	10.0689	7.58275e-24	2.58182e-21
TraesCS1D02G053000	2961.39	-0.712157	0.070765	-10.0637	7.99506e-24	2.70725e-21
TraesCS3B02G205600	867.342	-0.370249	0.0368315	-10.0525	8.95584e-24	3.01601e-21
TraesCS2D02G276000	54.6278	3.18149	0.316704	10.0456	9.60245e-24	3.2162e-21
TraesCS5B02G492500	49732.4	-0.339184	0.0337676	-10.0447	9.69655e-24	3.23016e-21
TraesCS3D02G216900	163.529	0.661801	0.0660248	10.0235	1.20141e-23	3.98067e-21
TraesCS5D02G207800	347.044	-0.453172	0.0452616	-10.0123	1.34609e-23	4.43619e-21
TraesCS4A02G105300	517.291	0.467754	0.0467319	10.0093	1.38701e-23	4.54675e-21
TraesCS1D02G400600	759.995	-0.441808	0.0442639	-9.98122	1.84186e-23	5.99704e-21
TraesCS5B02G140900	492.603	-0.494103	0.0495052	-9.98084	1.8489e-23	5.99704e-21
TraesCS5A02G469000	2736.96	0.630962	0.06327	9.97254	2.01031e-23	6.48645e-21
TraesCS3B02G430300	1080	-0.345219	0.0346413	-9.96555	2.1568e-23	6.92288e-21
TraesCS5D02G321000	106.481	0.987117	0.0991361	9.9572	2.34586e-23	7.49071e-21
TraesCS3A02G293900	827.251	0.432325	0.0434469	9.95065	2.5055e-23	7.95922e-21
TraesCS4B02G189200	1619.56	-0.259106	0.0260861	-9.93273	2.99924e-23	9.47884e-21
TraesCS3B02G293100	73.3946	1.28161	0.129056	9.93065	3.06241e-23	9.55191e-21
TraesCS3D02G159200	49.1401	1.19836	0.120676	9.93044	3.06886e-23	9.55191e-21
TraesCS4D02G113400	1459.39	0.517616	0.0521215	9.93097	3.05282e-23	9.55191e-21
TraesCS5B02G053300	325.445	0.533023	0.0537062	9.9248	3.24753e-23	1.00572e-20
TraesCS2B02G105700	3632.97	-0.314699	0.0317133	-9.92327	3.29761e-23	1.01107e-20
TraesCS5B02G134400	884.892	-0.256356	0.0258326	-9.92371	3.28316e-23	1.01107e-20
TraesCS7D02G249800	40.0696	2.47651	0.250157	9.89982	4.17005e-23	1.27224e-20
TraesCS5A02G048500	2010.49	-0.380864	0.038592	-9.86899	5.67335e-23	1.72235e-20
TraesCS4B02G152300	460.43	-0.446497	0.0453667	-9.84197	7.42445e-23	2.24291e-20
TraesCS7A02G422700	647.999	-0.310789	0.0316157	-9.83021	8.34427e-23	2.50849e-20
TraesCS6A02G214100	390.743	-0.60761	0.0619202	-9.81278	9.91999e-23	2.96771e-20
TraesCS2A02G245900	8725.78	-0.33354	0.0339999	-9.81005	1.01921e-22	3.0344e-20
TraesCS5B02G481200	745.831	-0.329514	0.0336134	-9.80304	1.09245e-22	3.2368e-20
TraesCS5B02G523000	917.685	-0.343297	0.0350247	-9.80158	1.10833e-22	3.26815e-20
TraesCS4D02G207500	192.314	2.11255	0.21608	9.77668	1.41785e-22	4.16092e-20
TraesCS2A02G050600	682.833	0.388801	0.039789	9.77156	1.49138e-22	4.35597e-20
TraesCS4A02G220700	254.313	0.608604	0.0623087	9.76756	1.55141e-22	4.50993e-20
TraesCS7A02G279400	917.128	-0.44952	0.0460464	-9.76233	1.63359e-22	4.72651e-20
TraesCS7B02G017200	2748.74	0.880933	0.0902536	9.76064	1.66097e-22	4.78328e-20
TraesCS3B02G182100	239.643	-0.500126	0.0512509	-9.75838	1.6985e-22	4.86862e-20
TraesCS7D02G243400	681.853	0.393733	0.0403795	9.75082	1.8299e-22	5.22099e-20
TraesCS6D02G145700	124.679	-0.762096	0.0782081	-9.74447	1.94795e-22	5.53217e-20
TraesCS4B02G390300	55.9374	0.952752	0.0978876	9.73312	2.17805e-22	6.1573e-20
TraesCS4B02G213400	494.216	1.27509	0.131096	9.72636	2.32781e-22	6.55061e-20
TraesCS3A02G363400	943.819	-0.463483	0.0476899	-9.71869	2.50978e-22	7.03058e-20
TraesCS2A02G313000	480.447	0.651892	0.0671867	9.70269	2.93639e-22	8.1884e-20
TraesCS4A02G031100	107.416	1.00256	0.103344	9.70122	2.97921e-22	8.27038e-20
TraesCS4D02G145600	40.2454	2.42902	0.250419	9.69984	3.01967e-22	8.34512e-20
TraesCS4A02G095500	49.4671	1.78629	0.184198	9.69767	3.08453e-22	8.4863e-20
TraesCS7B02G184100	7910.38	-0.383929	0.0396054	-9.69385	3.20238e-22	8.77138e-20
TraesCS5B02G038400	744.257	-0.592212	0.0611037	-9.69192	3.26343e-22	8.89906e-20
TraesCS4B02G037300	8963.62	0.581805	0.060046	9.68933	3.34725e-22	9.08742e-20
TraesCS5A02G545600	1253.03	0.776247	0.0801903	9.68006	3.66501e-22	9.90645e-20
TraesCS3B02G322200	67.6672	2.06393	0.213264	9.67784	3.74543e-22	1.00796e-19
TraesCS7A02G079000	1895	-0.325545	0.0336441	-9.67614	3.80829e-22	1.02042e-19
TraesCS1B02G156800	1714.19	-0.343504	0.0355047	-9.6749	3.85464e-22	1.02837e-19
TraesCS1D02G427700	131.472	0.705531	0.0729411	9.67261	3.94183e-22	1.0471e-19
TraesCS1B02G124100	2166.32	-0.537014	0.0556378	-9.65198	4.82173e-22	1.27534e-19
TraesCS3D02G517900	3394.23	0.380809	0.0394601	9.6505	4.89171e-22	1.28832e-19
TraesCS4A02G246100	355.896	-0.702269	0.0728382	-9.64149	5.34096e-22	1.40065e-19
TraesCS7D02G463100	182.297	0.629471	0.065304	9.63908	5.46735e-22	1.42772e-19
TraesCS4D02G162600	1750.64	-0.392511	0.040731	-9.63666	5.59793e-22	1.45565e-19
TraesCS4D02G295500	4070.92	-0.272093	0.0282544	-9.63011	5.96663e-22	1.54501e-19
TraesCS6A02G057500	175.164	0.701383	0.0728452	9.6284	6.06651e-22	1.5643e-19
TraesCS5D02G439400	158.929	0.713607	0.0741318	9.6262	6.1978e-22	1.59149e-19
TraesCS6D02G183200	1535.2	-0.29702	0.0309493	-9.597	8.23043e-22	2.10467e-19
TraesCS4D02G149800	2046.21	-0.364438	0.0380326	-9.58225	9.49523e-22	2.41807e-19
TraesCS5B02G074400	1495.29	-0.299251	0.0312802	-9.56678	1.1029e-21	2.79709e-19
TraesCS5D02G192700	536.907	0.44598	0.0466272	9.56482	1.12395e-21	2.83881e-19
TraesCS2D02G328300	430.657	0.451701	0.0473891	9.53175	1.54658e-21	3.89032e-19
TraesCS4B02G026000	592.64	-0.398386	0.0417982	-9.53117	1.55518e-21	3.89604e-19
TraesCS4B02G268500	233.472	1.00136	0.105375	9.50278	2.04362e-21	5.09895e-19
TraesCS4A02G355700	491.432	-0.64674	0.0680726	-9.50075	2.08388e-21	5.17845e-19
TraesCS3A02G127800	1576.21	-0.373014	0.0392812	-9.49598	2.18152e-21	5.39931e-19
TraesCS5D02G150000	777.886	-0.46977	0.0494899	-9.49223	2.26137e-21	5.57455e-19
TraesCS2D02G489000	238.286	0.742053	0.078187	9.49075	2.2938e-21	5.63196e-19
TraesCS2D02G265800	1294.21	-0.222139	0.0234481	-9.47361	2.7033e-21	6.61107e-19
TraesCS5B02G155000	1296.71	-0.315854	0.0333532	-9.46998	2.79896e-21	6.81795e-19
TraesCS7A02G564300	345.045	0.469864	0.049659	9.46181	3.02644e-21	7.34305e-19
TraesCS5A02G529100	541.219	-0.386631	0.0408768	-9.45846	3.12516e-21	7.55283e-19
TraesCS7D02G353800	33.5636	2.50082	0.264643	9.44976	3.39605e-21	8.17547e-19
TraesCS3D02G205800	525.86	-0.446889	0.0473159	-9.4448	3.56095e-21	8.53908e-19
TraesCS6A02G191500	221.649	-0.640549	0.0678427	-9.44167	3.6688e-21	8.7636e-19
TraesCS2B02G187400	197.914	0.709237	0.0751599	9.43638	3.85884e-21	9.18196e-19
TraesCS1A02G286200	2166.4	-0.266935	0.0282934	-9.43454	3.92717e-21	9.3086e-19
TraesCS4B02G112700	383.5	0.5045	0.0534849	9.43257	4.00163e-21	9.44874e-19
TraesCS2D02G080000	12973.4	0.392581	0.0416599	9.42348	4.36399e-21	1.0265e-18
TraesCS1A02G120100	1780.44	0.494824	0.0525959	9.40802	5.05573e-21	1.18469e-18
TraesCS5B02G066800	1072.57	-0.424517	0.0451456	-9.40328	5.28886e-21	1.23463e-18
TraesCS3D02G268500	29.1084	1.48081	0.157581	9.39713	5.60698e-21	1.30037e-18
TraesCS5B02G405600	126.501	0.830685	0.0883987	9.39703	5.61269e-21	1.30037e-18
TraesCS3B02G328600	919.615	0.375031	0.0400136	9.3726	7.07679e-21	1.63344e-18
TraesCS4B02G219600	207.282	-0.670558	0.0715719	-9.369	7.32227e-21	1.68379e-18
TraesCS2A02G508900	4583.92	-0.318466	0.0340032	-9.36576	7.55065e-21	1.72986e-18
TraesCS3A02G261200	1263.91	-0.291777	0.0311848	-9.35637	8.252e-21	1.88353e-18
TraesCS1B02G152100	1661.01	-0.354614	0.037983	-9.33612	9.99257e-21	2.27241e-18
TraesCS3B02G329100	743.449	0.588039	0.0629917	9.33518	1.00823e-20	2.28439e-18
TraesCS2B02G332400	492.595	-0.414164	0.0444387	-9.3199	1.16449e-20	2.62876e-18
TraesCS5A02G460900	3419.62	0.346687	0.0372147	9.31588	1.20947e-20	2.72034e-18
TraesCS4A02G151000	1788.48	-0.304523	0.0327769	-9.29079	1.53147e-20	3.43205e-18
TraesCS1D02G342100	26.2875	2.44159	0.262811	9.29028	1.53888e-20	3.43617e-18
TraesCS5B02G012100	7386.07	-0.289656	0.0312239	-9.27675	1.74733e-20	3.88753e-18
TraesCS6B02G092200	1162.67	0.99084	0.106821	9.2757	1.76456e-20	3.91175e-18
TraesCS7A02G450900	190.557	0.684457	0.0739591	9.25454	2.15161e-20	4.75267e-18
TraesCS6A02G159100	1083.29	-0.372184	0.0402406	-9.24897	2.26669e-20	4.98899e-18
TraesCS7A02G440500	3067.59	0.530452	0.0573555	9.24849	2.27689e-20	4.9936e-18
TraesCS7D02G492400	396.566	0.432518	0.046773	9.24718	2.30499e-20	5.03731e-18
TraesCS3A02G294500	812.035	0.50641	0.0548021	9.24071	2.44859e-20	5.33222e-18
TraesCS5B02G404900	901.841	-0.276769	0.0299873	-9.22952	2.71852e-20	5.89919e-18
TraesCS1B02G423500	2120.95	0.655197	0.0710072	9.22718	2.77852e-20	6.00823e-18
TraesCS7B02G259000	75.2023	1.8779	0.203892	9.21028	3.25289e-20	7.00941e-18
TraesCS5A02G160200	389.802	-0.411428	0.0446871	-9.20688	3.35751e-20	7.20964e-18
TraesCS2D02G246000	8968.43	-0.303256	0.0329502	-9.20347	3.46571e-20	7.39048e-18
TraesCS4A02G363700	4935.13	-0.649839	0.070607	-9.2036	3.46153e-20	7.39048e-18
TraesCS4B02G296300	964.894	-0.372967	0.0405332	-9.20151	3.52953e-20	7.50061e-18
TraesCS3B02G492700	246.89	0.441835	0.0480266	9.19979	3.58641e-20	7.57986e-18
TraesCS5D02G419100	150.192	0.725493	0.078861	9.19964	3.59142e-20	7.57986e-18
TraesCS5A02G314700	377.3	0.87405	0.0950815	9.19265	3.83288e-20	8.06186e-18
TraesCS4D02G214100	527.249	1.34958	0.146883	9.18809	3.99863e-20	8.3819e-18
TraesCS3B02G345900	887.726	0.847106	0.0922477	9.18295	4.19453e-20	8.76273e-18
TraesCS1B02G124800	1147.77	-0.37517	0.0409235	-9.16758	4.83739e-20	1.00716e-17
TraesCS5D02G047700	2435.31	0.3898	0.0425567	9.15956	5.211e-20	1.08129e-17
TraesCS1B02G068200	678.321	0.505863	0.0552597	9.15428	5.47205e-20	1.13165e-17
TraesCS7B02G227500	1352.23	-0.382757	0.0418211	-9.15223	5.5768e-20	1.14946e-17
TraesCS2D02G116500	596.324	-0.309071	0.0337784	-9.14996	5.69526e-20	1.16996e-17
TraesCS3B02G322100	38.5416	2.46289	0.269955	9.12332	7.28549e-20	1.49166e-17
TraesCS6A02G126900	46.4839	1.13795	0.124797	9.11844	7.62125e-20	1.55524e-17
TraesCS2D02G176700	551.502	0.362879	0.0398487	9.10642	8.51482e-20	1.7205e-17
TraesCS4B02G278200	59.5451	3.41072	0.37454	9.10643	8.51374e-20	1.7205e-17
TraesCS7B02G083600	1479.77	-0.374584	0.0411331	-9.10662	8.49896e-20	1.7205e-17
TraesCS3D02G294300	702.057	0.566673	0.0622427	9.10425	8.68649e-20	1.74945e-17
TraesCS7A02G311300	699.205	0.496991	0.0546314	9.09717	9.27179e-20	1.86124e-17
TraesCS4D02G353800	533.666	-0.492847	0.0542028	-9.09265	9.66555e-20	1.93399e-17
TraesCS2D02G276300	383.786	0.408465	0.0449247	9.09221	9.7042e-20	1.93544e-17
TraesCS4A02G208000	14887.7	-0.304119	0.0334685	-9.0867	1.02089e-19	2.02952e-17
TraesCS5A02G165800	818.764	0.288263	0.0317454	9.08045	1.08127e-19	2.14266e-17
TraesCS5B02G557500	559.719	0.486651	0.0536363	9.07316	1.15613e-19	2.28366e-17
TraesCS1D02G137000	476.71	-0.362911	0.0400014	-9.07245	1.16368e-19	2.29122e-17
TraesCS3B02G147200	492.088	-0.461112	0.0508563	-9.06695	1.2239e-19	2.40212e-17
TraesCS5A02G321600	63.5254	0.945358	0.104439	9.05181	1.40624e-19	2.75123e-17
TraesCS7B02G064000	21.244	2.37602	0.262827	9.04021	1.56366e-19	3.04953e-17
TraesCS2A02G404100	7994.36	-0.381184	0.0421735	-9.03848	1.58865e-19	3.08849e-17
TraesCS1B02G154000	554.878	-0.353422	0.0391121	-9.03614	1.62295e-19	3.14526e-17
TraesCS1D02G210600	579.891	-0.373028	0.0413245	-9.02679	1.76777e-19	3.41518e-17
TraesCS6B02G040700	148.02	0.764831	0.084776	9.02179	1.85043e-19	3.5637e-17
TraesCS4A02G184600	205.025	-0.622822	0.0690461	-9.02038	1.87436e-19	3.59853e-17
TraesCS5A02G156800	1667.91	-0.252564	0.0280047	-9.01861	1.90488e-19	3.64577e-17
TraesCS7D02G068400	48.5466	1.1935	0.132559	9.0035	2.18635e-19	4.17152e-17
TraesCS2B02G409300	540.501	-0.488336	0.0542829	-8.99613	2.33821e-19	4.4475e-17
TraesCS6D02G322300	60.0501	2.17989	0.242471	8.99034	2.46473e-19	4.67374e-17
TraesCS5A02G553900	130.313	0.727061	0.0809024	8.98689	2.54329e-19	4.80792e-17
TraesCS4B02G268200	7939.71	-0.196554	0.0218777	-8.9842	2.60618e-19	4.91174e-17
TraesCS5D02G058900	1470.65	-0.362181	0.0403387	-8.97849	2.74499e-19	5.15757e-17
TraesCS5B02G171700	321.82	0.609652	0.0680846	8.95433	3.41808e-19	6.40273e-17
TraesCS3B02G206200	63.622	1.09351	0.122127	8.95384	3.43328e-19	6.41171e-17
TraesCS6D02G339200	2155.81	-0.308833	0.0345075	-8.94974	3.56319e-19	6.63421e-17
TraesCS2A02G263400	1529.59	-0.243674	0.027231	-8.94841	3.6065e-19	6.69462e-17
TraesCS7A02G288700	7368	-0.272357	0.0304678	-8.93916	3.92135e-19	7.25721e-17
TraesCS7D02G136300	685.226	0.60726	0.0680264	8.92682	4.38423e-19	8.08956e-17
TraesCS2A02G310800	103.735	1.00397	0.112474	8.92617	4.40997e-19	8.11277e-17
TraesCS3B02G347600	516.942	-0.708612	0.0794469	-8.91931	4.69181e-19	8.60557e-17
TraesCS1D02G415800	747.458	0.354016	0.0397047	8.91622	4.82482e-19	8.82327e-17
TraesCS7D02G160400	32.9506	1.97651	0.221747	8.91334	4.95171e-19	9.02851e-17
TraesCS2A02G193300	719.556	-0.411976	0.0462352	-8.91043	5.08333e-19	9.24116e-17
TraesCS7B02G279500	1105.38	-0.287454	0.0322865	-8.90321	5.42537e-19	9.83396e-17
TraesCS7B02G223400	3274.49	0.529046	0.0594819	8.89424	5.88187e-19	1.06301e-16
TraesCS2D02G427700	8399.71	-0.225558	0.0253775	-8.88811	6.21575e-19	1.12007e-16
TraesCS2B02G217800	1177.73	-0.320555	0.0360724	-8.88645	6.30942e-19	1.13364e-16
TraesCS1D02G162600	866.451	-0.489521	0.0551227	-8.88057	6.65215e-19	1.19174e-16
TraesCS1D02G290100	2869.4	-0.677717	0.0763954	-8.87118	7.23771e-19	1.29289e-16
TraesCS4B02G390400	127.694	0.73094	0.082403	8.87031	7.29444e-19	1.29925e-16
TraesCS1A02G281400	1462.98	-0.367126	0.0414469	-8.85774	8.16523e-19	1.446e-16
TraesCS5B02G050600	264.681	-0.443576	0.050077	-8.85787	8.15581e-19	1.446e-16
TraesCS4D02G068100	268.132	-0.686888	0.0777126	-8.83882	9.67306e-19	1.70674e-16
TraesCS5D02G195000	1013.3	-0.43146	0.0488154	-8.8386	9.69295e-19	1.70674e-16
TraesCS4B02G088800	311.69	-0.550621	0.062311	-8.83666	9.86194e-19	1.73154e-16
TraesCS2D02G172500	434.907	0.688381	0.0779072	8.83591	9.92885e-19	1.73341e-16
TraesCS6D02G269300	3843.28	0.51489	0.0582711	8.83612	9.91018e-19	1.73341e-16
TraesCS5D02G541100	3187.35	0.371748	0.0421282	8.82421	1.10239e-18	1.91915e-16
TraesCS4B02G196300	361.684	-0.368502	0.0417679	-8.8226	1.11833e-18	1.94142e-16
TraesCS4B02G159900	3566.79	-0.235873	0.0267362	-8.82221	1.12222e-18	1.9427e-16
TraesCS7A02G378600	3188.67	-0.250096	0.0283626	-8.81783	1.16695e-18	2.01447e-16
TraesCS6B02G310600	14029.8	-0.28268	0.0320621	-8.81663	1.17956e-18	2.03056e-16
TraesCS3A02G028500	895.421	0.488392	0.0553986	8.81595	1.18672e-18	2.03719e-16
TraesCS5A02G431400	342.559	0.523274	0.0593579	8.81557	1.19082e-18	2.03854e-16
TraesCS2D02G401100	9219.85	-0.406643	0.0461393	-8.81336	1.21446e-18	2.07326e-16
TraesCS3D02G039000	2770.07	0.464457	0.0527714	8.80129	1.35247e-18	2.30248e-16
TraesCS5D02G508500	207.197	0.490344	0.0557812	8.79049	1.4891e-18	2.5281e-16
TraesCS1B02G168200	2886.86	-0.293118	0.0333464	-8.79009	1.49445e-18	2.53022e-16
TraesCS4B02G164300	1681.59	-0.336575	0.0383004	-8.78776	1.52571e-18	2.57607e-16
TraesCS3D02G289400	1009.08	-0.376942	0.0429029	-8.78594	1.55063e-18	2.61099e-16
TraesCS1B02G137300	168.737	0.694224	0.07903	8.78431	1.57328e-18	2.64191e-16
TraesCS1B02G118000	807.384	-0.401149	0.0456892	-8.77994	1.63559e-18	2.73908e-16
TraesCS3A02G369700	241.008	0.483393	0.0551072	8.77186	1.75731e-18	2.93495e-16
TraesCS3A02G112900	10.391	4.26278	0.486853	8.75578	2.02688e-18	3.37601e-16
TraesCS5A02G549700	1392.88	-0.318017	0.0363346	-8.75246	2.08757e-18	3.46773e-16
TraesCS2D02G395200	9218.31	-0.659375	0.0753759	-8.74782	2.17516e-18	3.60351e-16
TraesCS7A02G404300	7033.41	0.705627	0.0806885	8.74508	2.22851e-18	3.68201e-16
TraesCS5B02G180300	269.49	0.971484	0.111203	8.73609	2.41313e-18	3.97638e-16
TraesCS7D02G014900	361.218	-0.922249	0.105621	-8.73171	2.50843e-18	4.12239e-16
TraesCS2D02G388800	711.379	-0.373476	0.0428146	-8.72311	2.70658e-18	4.4362e-16
TraesCS1B02G139500	1389.18	0.488952	0.0560637	8.72137	2.7485e-18	4.49297e-16
TraesCS2A02G169100	543.924	0.379531	0.0435237	8.72009	2.77978e-18	4.53208e-16
TraesCSU02G129600	726.668	0.652864	0.0748965	8.71689	2.85942e-18	4.64961e-16
TraesCS1B02G059100	6753.2	0.361608	0.0414876	8.71606	2.88046e-18	4.67151e-16
TraesCS3A02G174600	1055.4	0.360651	0.0414002	8.71133	3.00339e-18	4.85808e-16
TraesCS3B02G230700	1660.95	-0.264336	0.030354	-8.70844	3.08083e-18	4.9703e-16
TraesCS2B02G207000	799.947	-0.297564	0.0341729	-8.70761	3.10363e-18	4.994e-16
TraesCS7B02G001600	361.111	0.478177	0.0549525	8.70165	3.27083e-18	5.24935e-16
TraesCS4A02G150800	1249.11	-0.313727	0.0360644	-8.69908	3.34599e-18	5.35602e-16
TraesCS5B02G200200	383.555	-0.359676	0.0413809	-8.69185	3.56593e-18	5.69329e-16
TraesCS1D02G346100	1636.64	-0.234018	0.0269459	-8.68474	3.7961e-18	6.04511e-16
TraesCS2D02G405000	804.351	-0.322258	0.0371156	-8.68255	3.86986e-18	6.1467e-16
TraesCS3A02G177500	1617.55	-0.324609	0.0374094	-8.67722	4.0557e-18	6.42532e-16
TraesCS3A02G473900	1460.55	-0.32905	0.0379303	-8.6751	4.13183e-18	6.52914e-16
TraesCS3A02G112100	794.725	-0.346736	0.0400899	-8.64897	5.19642e-18	8.1904e-16
TraesCS2A02G169800	11342.8	0.314133	0.0363683	8.63757	5.74215e-18	9.02748e-16
TraesCS5B02G116900	568.495	-0.429353	0.04972	-8.63541	5.85146e-18	9.17593e-16
TraesCS6D02G293500	218.254	0.477705	0.0553244	8.63462	5.89205e-18	9.21613e-16
TraesCS5A02G508700	1071.76	0.55759	0.0646451	8.62541	6.38645e-18	9.96415e-16
TraesCS7B02G303900	7143.62	0.689909	0.0800176	8.62196	6.58151e-18	1.02426e-15
TraesCS5A02G138000	575.449	-0.348388	0.0404159	-8.62009	6.69038e-18	1.03858e-15
TraesCS5D02G399700	522.634	0.299291	0.0347215	8.61975	6.7098e-18	1.03897e-15
TraesCS1A02G131500	1520.88	-0.291261	0.0338233	-8.61123	7.22795e-18	1.11435e-15
TraesCS2B02G347800	1307.07	-0.393943	0.045748	-8.61116	7.23275e-18	1.11435e-15
TraesCS4B02G208900	27.7905	1.75655	0.204041	8.60882	7.38169e-18	1.13446e-15
TraesCS3A02G351800	915.486	0.557945	0.064841	8.60482	7.64388e-18	1.17183e-15
TraesCS3D02G126100	849.581	-0.307223	0.0357083	-8.60368	7.72016e-18	1.18059e-15
TraesCS1A02G106600	1774.71	-0.496433	0.0577062	-8.60277	7.78172e-18	1.18706e-15
TraesCS6A02G007500	204.035	0.501734	0.0583907	8.59271	8.49452e-18	1.29259e-15
TraesCS3D02G207900	553.587	0.449623	0.0523698	8.58554	9.0409e-18	1.37235e-15
TraesCS4B02G212300	73.4668	1.19664	0.139454	8.58087	9.41592e-18	1.42576e-15
TraesCS1B02G248000	5489.41	-0.377645	0.0440449	-8.57409	9.98722e-18	1.50856e-15
TraesCS7B02G280400	3416.18	-0.219607	0.0256281	-8.569	1.04391e-17	1.57296e-15
TraesCS5B02G425300	399.568	0.385578	0.0450853	8.5522	1.20764e-17	1.81523e-15
TraesCS1B02G373400	165.396	0.791194	0.0925604	8.54786	1.25389e-17	1.88016e-15
TraesCS2B02G030700	1153.38	0.340187	0.0398157	8.54405	1.29601e-17	1.93861e-15
TraesCS4A02G392600	13.7472	4.36757	0.511259	8.54277	1.31043e-17	1.95543e-15
TraesCS2D02G198400	1263.93	-0.325866	0.0381544	-8.54074	1.33369e-17	1.98533e-15
TraesCS2B02G174200	121.437	-0.616743	0.0722167	-8.54017	1.34021e-17	1.99023e-15
TraesCS5A02G135500	1186.78	-0.286966	0.0336316	-8.53264	1.4305e-17	2.1192e-15
TraesCS5B02G281700	509.287	-0.405706	0.0475542	-8.53144	1.44534e-17	2.13095e-15
TraesCS6B02G411600	257.484	0.569079	0.0667024	8.5316	1.44332e-17	2.13095e-15
TraesCS3A02G191900	795.949	-0.348106	0.0408796	-8.51539	1.66038e-17	2.44214e-15
TraesCS4B02G243400	41.4842	1.39819	0.164225	8.51383	1.68283e-17	2.46928e-15
TraesCS2D02G075500	804.277	-0.296311	0.0348364	-8.50579	1.8037e-17	2.64034e-15
TraesCS2D02G340700	826.581	0.375743	0.0441795	8.50492	1.81713e-17	2.6537e-15
TraesCS2B02G148000	4987.95	-0.382271	0.0449606	-8.50235	1.85792e-17	2.70685e-15
TraesCS7D02G088300	46.9819	2.81326	0.331001	8.49926	1.90805e-17	2.77333e-15
TraesCS3B02G390700	32.5583	1.6459	0.1937	8.49715	1.94308e-17	2.8176e-15
TraesCS2A02G257000	1391.45	-0.238877	0.0281269	-8.49284	2.01645e-17	2.91713e-15
TraesCS4A02G166900	7429.6	-0.390059	0.0459825	-8.48276	2.19917e-17	3.17402e-15
TraesCS3D02G311100	875.633	0.858607	0.101225	8.48217	2.21028e-17	3.1826e-15
TraesCS7D02G030000	2261.88	-0.382522	0.0450989	-8.48186	2.21614e-17	3.1836e-15
TraesCS1D02G411200	734.368	-0.372554	0.0439309	-8.48045	2.24327e-17	3.21507e-15
TraesCS2B02G425800	640.227	-0.39463	0.046541	-8.47918	2.26792e-17	3.24287e-15
TraesCS5B02G426400	379.895	-0.676019	0.0797374	-8.47807	2.28966e-17	3.26636e-15
TraesCS5B02G258900	18639.7	0.417833	0.0493704	8.46324	2.60059e-17	3.70136e-15
TraesCS3B02G235200	265.121	-0.483148	0.0571211	-8.4583	2.71301e-17	3.85248e-15
TraesCS3A02G024900	852.525	0.454768	0.053775	8.45686	2.74676e-17	3.89144e-15
TraesCS4B02G107200	989.268	-0.291188	0.034449	-8.45272	2.84589e-17	4.02263e-15
TraesCS4A02G011100	582.037	0.367524	0.0435183	8.44527	3.0335e-17	4.26823e-15
TraesCS4B02G087000	1090.38	0.31208	0.0369527	8.44537	3.03088e-17	4.26823e-15
TraesCS5D02G118900	259.353	0.487259	0.0576984	8.44493	3.04221e-17	4.27074e-15
TraesCS3B02G322000	45.9178	2.1603	0.25584	8.44396	3.06754e-17	4.29651e-15
TraesCS5A02G476600	135.112	0.766002	0.0907903	8.43705	3.25449e-17	4.53773e-15
TraesCS5B02G480100	1677.56	-0.27052	0.0320625	-8.43726	3.24856e-17	4.53773e-15
TraesCS6D02G368800	1823.31	-0.244746	0.0290111	-8.43629	3.27571e-17	4.557e-15
TraesCS4B02G379300	540.957	0.668272	0.0792876	8.42846	3.50242e-17	4.86142e-15
TraesCS6B02G063300	3063.57	0.339303	0.0402708	8.42554	3.59087e-17	4.973e-15
TraesCS1D02G087300	155.727	0.957758	0.113688	8.42445	3.62459e-17	5.00843e-15
TraesCS6A02G068300	1187.21	0.912156	0.108305	8.42211	3.69767e-17	5.09798e-15
TraesCS5A02G215000	894.445	-0.362327	0.0430236	-8.42159	3.7142e-17	5.10934e-15
TraesCS6B02G382800	245.436	-0.51494	0.0611757	-8.4174	3.84928e-17	5.28337e-15
TraesCS2B02G342400	759.584	-0.405999	0.0482518	-8.41417	3.95685e-17	5.41895e-15
TraesCS3B02G180500	2404.49	-0.314163	0.0373663	-8.40765	4.18305e-17	5.71602e-15
TraesCS4A02G356100	5336.82	-0.350436	0.041699	-8.40395	4.31701e-17	5.88603e-15
TraesCS4A02G191500	1371.14	-0.294	0.0349908	-8.40221	4.38147e-17	5.9476e-15
TraesCS5A02G525900	1119.54	0.281298	0.033479	8.40221	4.38141e-17	5.9476e-15
TraesCS1B02G130200	362.027	1.0819	0.128772	8.40166	4.40205e-17	5.9624e-15
TraesCS6B02G244100	245.541	-0.663879	0.0790319	-8.40014	4.45948e-17	6.02695e-15
TraesCS6D02G260200	2564.75	0.455385	0.0542238	8.39824	4.53217e-17	6.11178e-15
TraesCS7A02G147900	4984.7	0.358651	0.0427441	8.39066	4.8343e-17	6.50498e-15
TraesCS5A02G069200	98.8623	0.752087	0.0896498	8.38916	4.89631e-17	6.57406e-15
TraesCS7A02G246000	363.038	0.764258	0.091119	8.38748	4.96693e-17	6.65439e-15
TraesCS3A02G175900	993.026	-0.376978	0.0449499	-8.38663	5.00275e-17	6.68784e-15
TraesCS7A02G198400	166.319	0.603435	0.0719596	8.38574	5.04065e-17	6.72393e-15
TraesCS6D02G303500	511.972	-0.318896	0.0380877	-8.37267	5.63254e-17	7.49724e-15
TraesCS1B02G320800	10427.7	-0.295016	0.0352631	-8.36614	5.95362e-17	7.90753e-15
TraesCS3B02G219900	1376.94	-0.326849	0.0390971	-8.35995	6.27475e-17	8.31613e-15
TraesCS6D02G180200	305.5	0.429906	0.0514379	8.35777	6.3917e-17	8.45295e-15
TraesCS1B02G275700	535.975	-0.379123	0.0454166	-8.34766	6.9628e-17	9.18851e-15
TraesCS1D02G361300	159.13	0.574189	0.0688305	8.34208	7.29973e-17	9.61256e-15
TraesCS7A02G314900	323.3	0.48015	0.0575754	8.33949	7.46088e-17	9.80382e-15
TraesCS1D02G451300	2945.66	-0.326831	0.0392031	-8.33685	7.6296e-17	9.98401e-15
TraesCS3D02G496900	599.22	-0.364675	0.0437427	-8.33684	7.63041e-17	9.98401e-15
TraesCS2B02G213400	863.958	-0.336037	0.0403534	-8.32734	8.26803e-17	1.07954e-14
TraesCS7D02G542900	1201.34	0.31902	0.0383382	8.32121	8.70697e-17	1.13445e-14
TraesCS4B02G178700	282.068	-0.548892	0.0659748	-8.31973	8.81658e-17	1.1463e-14
TraesCS6B02G192900	2747.59	-0.302816	0.0364055	-8.31784	8.95797e-17	1.16224e-14
TraesCS3B02G091000	76.308	0.711601	0.0856151	8.31162	9.44032e-17	1.22224e-14
TraesCS5B02G440700	181.089	0.649413	0.0781751	8.30715	9.80276e-17	1.26651e-14
TraesCS1B02G203800	557.924	-0.647472	0.0779905	-8.30193	1.02431e-16	1.32064e-14
TraesCS6A02G193500	437.919	-0.458149	0.0552798	-8.28781	1.1535e-16	1.48409e-14
TraesCS6A02G379800	372.399	0.518189	0.0625283	8.28727	1.15877e-16	1.48776e-14
TraesCS6D02G037400	1783.63	-0.282561	0.0341101	-8.28378	1.19327e-16	1.52888e-14
TraesCS7A02G417000	767.335	-0.374576	0.045263	-8.27554	1.27871e-16	1.63494e-14
TraesCS6B02G223700	533.553	-0.292975	0.035413	-8.27308	1.30545e-16	1.66567e-14
TraesCS7D02G385100	367.635	0.441504	0.0533728	8.27208	1.31643e-16	1.67621e-14
TraesCS7A02G369400	396.935	-0.691595	0.0836207	-8.27062	1.33264e-16	1.69336e-14
TraesCS3D02G248400	386.592	-0.375753	0.0454762	-8.26262	1.42506e-16	1.80707e-14
TraesCS5A02G324400	378.788	0.427904	0.0518478	8.25308	1.54364e-16	1.95342e-14
TraesCS3A02G197200	1081.93	-0.35043	0.0424754	-8.25018	1.5816e-16	1.99327e-14
TraesCS3B02G207500	1981.05	-0.301853	0.0365864	-8.25041	1.57847e-16	1.99327e-14
TraesCS4A02G364900	186.501	0.5438	0.0659236	8.24894	1.59809e-16	2.00994e-14
TraesCS5B02G062300	1460.53	-0.270431	0.0328293	-8.23747	1.75887e-16	2.20765e-14
TraesCS1D02G174600	175.201	0.566793	0.0689072	8.22545	1.9446e-16	2.4358e-14
TraesCS7A02G108900	1784.61	0.334053	0.0406419	8.21942	2.04484e-16	2.55618e-14
TraesCS2B02G230900	1381.87	0.441086	0.0536761	8.21755	2.07705e-16	2.59118e-14
TraesCS6B02G327500	3799.75	-0.603023	0.0734149	-8.21391	2.14103e-16	2.6656e-14
TraesCS2A02G334600	1139.11	-0.48683	0.0593558	-8.20188	2.36648e-16	2.94035e-14
TraesCS3D02G312900	473.231	-0.544603	0.0664256	-8.19869	2.43018e-16	3.01342e-14
TraesCS2A02G098400	113.816	0.668235	0.0815307	8.19612	2.48276e-16	3.07244e-14
TraesCS6B02G171300	364.014	-0.326596	0.0398789	-8.18968	2.61911e-16	3.23468e-14
TraesCS1B02G429900	79.5415	1.04016	0.127123	8.18226	2.78564e-16	3.43347e-14
TraesCS5D02G161200	619.482	-0.349227	0.0427187	-8.17503	2.9579e-16	3.63851e-14
TraesCS1D02G164800	1712.52	-0.3133	0.0383398	-8.17167	3.04152e-16	3.73392e-14
TraesCS3A02G199200	1011.36	-0.382975	0.0468887	-8.16774	3.14213e-16	3.84976e-14
TraesCS3D02G167100	315.135	0.36375	0.0445387	8.16705	3.1602e-16	3.86422e-14
TraesCS3B02G416100	342.576	0.480726	0.0588691	8.16601	3.18753e-16	3.88224e-14
TraesCS5A02G455600	600.702	0.382049	0.046785	8.16605	3.18643e-16	3.88224e-14
TraesCS1D02G450400	1690.31	-0.202453	0.0247935	-8.16558	3.19885e-16	3.88834e-14
TraesCS5B02G423800	247.93	-0.565195	0.0692747	-8.15876	3.38485e-16	4.10633e-14
TraesCS2D02G565300	245.435	-0.999211	0.122567	-8.15237	3.56864e-16	4.32078e-14
TraesCS5A02G142100	1229.26	-0.394211	0.048378	-8.14857	3.68263e-16	4.45006e-14
TraesCS5D02G211900	1914.57	-0.269496	0.0330838	-8.14587	3.76558e-16	4.52797e-14
TraesCS5D02G473100	2717.56	0.314192	0.0385696	8.14609	3.7587e-16	4.52797e-14
TraesCS5D02G565200	1469.42	-0.222416	0.0273046	-8.14576	3.76915e-16	4.52797e-14
TraesCS7A02G356300	10499.6	-0.304693	0.0374099	-8.14471	3.80193e-16	4.55847e-14
TraesCS5B02G134700	923.07	0.469024	0.0576075	8.14172	3.89691e-16	4.66328e-14
TraesCS7A02G322200	379.928	-0.37014	0.0454678	-8.14072	3.92948e-16	4.69314e-14
TraesCS2A02G177300	354.67	-0.347193	0.0426721	-8.13629	4.07558e-16	4.85822e-14
TraesCS3D02G021200	668.881	0.465114	0.0571812	8.13404	4.15227e-16	4.94007e-14
TraesCS4D02G295000	854.665	-0.294249	0.0361865	-8.13147	4.24119e-16	5.03614e-14
TraesCS4D02G127600	750.244	-0.388026	0.047727	-8.13011	4.28887e-16	5.08297e-14
TraesCS5D02G401700	475.828	-0.390078	0.0480224	-8.12282	4.55458e-16	5.38751e-14
TraesCS2A02G291700	778.119	0.518219	0.0638231	8.11961	4.6767e-16	5.52138e-14
TraesCS2B02G096200	15045.7	0.330814	0.0407535	8.11743	4.76155e-16	5.6108e-14
TraesCS3A02G487200	489.854	-0.582993	0.0718403	-8.11512	4.85315e-16	5.70783e-14
TraesCS3B02G432000	669.264	0.413063	0.050913	8.11311	4.93419e-16	5.79208e-14
TraesCS5B02G092400	291.231	-0.362952	0.0447436	-8.11182	4.98688e-16	5.8428e-14
TraesCS4B02G206700	536.327	1.29893	0.160202	8.10808	5.14243e-16	6.01362e-14
TraesCS4A02G169100	42180.1	0.350389	0.0432394	8.10345	5.34213e-16	6.23531e-14
TraesCS6B02G084600	79.9346	0.685747	0.0846512	8.10085	5.45771e-16	6.35819e-14
TraesCS7D02G174700	695.35	-0.324245	0.0400435	-8.09733	5.61776e-16	6.53229e-14
TraesCS4A02G097900	161.927	1.67946	0.207691	8.08633	6.14892e-16	7.13645e-14
TraesCS6A02G109000	592.55	0.44352	0.0548923	8.07983	6.48596e-16	7.51348e-14
TraesCS4B02G385900	2923.53	-0.27993	0.0346603	-8.0764	6.67088e-16	7.71319e-14
TraesCS3B02G102200	531.592	-0.307186	0.0380423	-8.07487	6.75487e-16	7.79568e-14
TraesCS2B02G435100	2270.04	-0.587732	0.0728466	-8.06807	7.14161e-16	8.2266e-14
TraesCS2B02G293500	2265.05	-0.36672	0.0454576	-8.0673	7.18683e-16	8.26324e-14
TraesCS3A02G237100	2860.24	-0.284649	0.0352861	-8.06687	7.21245e-16	8.27726e-14
TraesCS7B02G254700	933.516	0.843932	0.104651	8.06423	7.36997e-16	8.44231e-14
TraesCS3B02G440600	286.041	1.13862	0.141267	8.06003	7.6274e-16	8.72099e-14
TraesCS5B02G041800	2667.7	0.355166	0.0440925	8.05503	7.94583e-16	9.06825e-14
TraesCS5A02G201500	261.733	-0.383333	0.0475995	-8.05331	8.05873e-16	9.1801e-14
TraesCS7D02G397700	10915.1	0.631295	0.0784107	8.05114	8.20292e-16	9.32712e-14
TraesCS1B02G140700	816.434	-0.28574	0.0355139	-8.04586	8.56431e-16	9.7201e-14
TraesCS6A02G353900	624.866	0.337173	0.0419157	8.04407	8.69036e-16	9.84503e-14
TraesCS3B02G323600	424.494	0.51428	0.0639792	8.03824	9.11384e-16	1.03058e-13
TraesCS7B02G124100	2831.2	-0.300832	0.0374364	-8.03582	9.29525e-16	1.04917e-13
TraesCS5B02G092100	847.477	0.343284	0.0427253	8.03468	9.3823e-16	1.05706e-13
TraesCS1B02G190400	1513.55	-0.308746	0.0384338	-8.03319	9.49666e-16	1.06799e-13
TraesCS1B02G129400	869.391	-0.286232	0.0356545	-8.02791	9.9145e-16	1.11154e-13
TraesCS5A02G140700	379.183	-0.370425	0.0461426	-8.02785	9.91993e-16	1.11154e-13
TraesCS7D02G159800	9269.8	0.826819	0.103	8.02734	9.96072e-16	1.11408e-13
TraesCS6B02G150700	185.37	0.621093	0.0773844	8.02607	1.00642e-15	1.12362e-13
TraesCS6B02G216100	3934.81	-0.253869	0.0316463	-8.02206	1.03984e-15	1.15883e-13
TraesCS4A02G163700	461.065	-0.371384	0.0463098	-8.01956	1.06126e-15	1.18057e-13
TraesCS4A02G407000	4047.93	0.515853	0.0643367	8.01803	1.07454e-15	1.19318e-13
TraesCS5A02G409300	271.496	0.6517	0.081317	8.01432	1.10748e-15	1.22755e-13
TraesCS1D02G452200	1861.89	-0.446233	0.0556823	-8.01391	1.11118e-15	1.22944e-13
TraesCS5D02G423700	252.811	0.679622	0.0848142	8.01307	1.11881e-15	1.23566e-13
TraesCS6D02G262700	20315.1	-0.22964	0.0286656	-8.01099	1.13791e-15	1.25451e-13
TraesCS7B02G484200	5979.56	0.252494	0.0315256	8.00918	1.15474e-15	1.27079e-13
TraesCS1D02G236500	7335.78	-0.363115	0.0453544	-8.00617	1.18336e-15	1.29996e-13
TraesCS3D02G453500	147.55	0.634712	0.0793189	8.00203	1.22384e-15	1.34205e-13
TraesCS2D02G344900	911.798	0.354056	0.044256	8.00019	1.24228e-15	1.35984e-13
TraesCS3B02G226300	1701	-0.324596	0.0405779	-7.99934	1.25083e-15	1.36678e-13
TraesCS5A02G347000	139.672	0.570823	0.0714021	7.99448	1.30118e-15	1.41928e-13
TraesCS2A02G356400	861.477	-0.267307	0.0334381	-7.99408	1.30541e-15	1.42138e-13
TraesCS3A02G148200	180.189	0.521252	0.065212	7.99318	1.31497e-15	1.42926e-13
TraesCS2B02G334400	515.604	0.324838	0.0406532	7.99047	1.34423e-15	1.45849e-13
TraesCS3B02G222600	839.245	-0.411592	0.0515119	-7.99024	1.34681e-15	1.45872e-13
TraesCS3A02G285600	1893.91	-0.287476	0.0360207	-7.98086	1.45323e-15	1.57122e-13
TraesCS6A02G128100	14.7389	1.58609	0.198756	7.98009	1.46228e-15	1.57824e-13
TraesCSU02G139700	1228.18	-0.29812	0.0374063	-7.96978	1.58951e-15	1.71256e-13
TraesCS6D02G252900	331.013	-0.544328	0.0683297	-7.96621	1.6362e-15	1.75979e-13
TraesCS5D02G492400	4624.64	-0.287239	0.036075	-7.96228	1.689e-15	1.81341e-13
TraesCS4B02G069300	683.083	-0.505583	0.0634996	-7.96199	1.693e-15	1.81454e-13
TraesCS6D02G065900	1826.64	0.836957	0.105178	7.95756	1.75472e-15	1.87743e-13
TraesCS1B02G472000	755.131	0.327542	0.0411698	7.9559	1.7784e-15	1.89946e-13
TraesCS4B02G307500	1518.41	-0.238302	0.0299586	-7.95439	1.80012e-15	1.91934e-13
TraesCS5D02G410000	851.233	-0.24848	0.0312482	-7.95181	1.83805e-15	1.9564e-13
TraesCS1D02G211000	468.85	-0.478286	0.0602044	-7.94437	1.95182e-15	2.07391e-13
TraesCS4B02G211800	1186.57	-0.260976	0.0328615	-7.9417	1.99423e-15	2.11532e-13
TraesCS4D02G209700	30.9793	1.46838	0.185026	7.93605	2.08718e-15	2.21012e-13
TraesCS6A02G165500	2781.67	-0.301253	0.0379629	-7.93546	2.09721e-15	2.21692e-13
TraesCS2D02G345300	802.852	-0.304539	0.0383872	-7.93336	2.1329e-15	2.25079e-13
TraesCS2D02G174600	255.455	-0.405185	0.0510805	-7.93229	2.15146e-15	2.2665e-13
TraesCS5A02G400100	862.806	-0.28447	0.0359031	-7.92327	2.31348e-15	2.43303e-13
TraesCS4B02G142400	12431.2	0.514205	0.0649005	7.92298	2.31879e-15	2.43445e-13
TraesCS1D02G319300	385.038	0.595654	0.0752028	7.92064	2.36292e-15	2.47656e-13
TraesCS7B02G167500	245.406	-0.783478	0.098935	-7.91912	2.39205e-15	2.50284e-13
TraesCS3A02G240500	1191.27	-0.295062	0.0372622	-7.91851	2.40368e-15	2.51075e-13
TraesCS6A02G047700	506.03	0.429732	0.054271	7.91826	2.40859e-15	2.51161e-13
TraesCS4A02G157200	266.644	-0.56428	0.0712781	-7.9166	2.44101e-15	2.54112e-13
TraesCS4D02G213100	372.993	0.602561	0.0762158	7.90598	2.65832e-15	2.76268e-13
TraesCS3B02G269500	857.533	-0.368734	0.0466496	-7.90435	2.69337e-15	2.79439e-13
TraesCS7D02G289900	576.34	-0.377279	0.0477551	-7.9003	2.78237e-15	2.88188e-13
TraesCS5B02G128900	868.81	-0.290839	0.0368306	-7.89666	2.86469e-15	2.96217e-13
TraesCS5B02G061000	349.104	-0.459353	0.0581877	-7.89433	2.91885e-15	3.01312e-13
TraesCS5B02G387300	877.192	-0.667136	0.0845508	-7.89036	3.0132e-15	3.10531e-13
TraesCS7D02G375500	3487.55	-0.254669	0.0322903	-7.88684	3.09944e-15	3.18885e-13
TraesCS7D02G227400	389.487	-0.317357	0.0402886	-7.8771	3.35076e-15	3.44168e-13
TraesCS5A02G548800	578.95	0.340861	0.0432889	7.8741	3.43208e-15	3.51934e-13
TraesCS3A02G296500	144.21	0.471316	0.0598727	7.87196	3.49126e-15	3.57408e-13
TraesCS1B02G461900	748.234	-0.225234	0.0286136	-7.87158	3.50178e-15	3.5789e-13
TraesCS4A02G106300	3771.9	0.584905	0.0743332	7.86869	3.58385e-15	3.65671e-13
TraesCS5D02G382400	5468.72	0.345052	0.0438583	7.86742	3.62034e-15	3.68784e-13
TraesCS6D02G252400	959.324	-0.305431	0.0388302	-7.86582	3.6668e-15	3.729e-13
TraesCS2D02G128600	4282.03	-0.355792	0.0452426	-7.86409	3.71783e-15	3.76846e-13
TraesCS3D02G419200	3141.88	0.523932	0.0666218	7.86428	3.71225e-15	3.76846e-13
TraesCS5A02G025200	486.997	0.976211	0.124206	7.85963	3.85257e-15	3.89863e-13
TraesCS2B02G422000	7571.65	-0.320099	0.040731	-7.85885	3.87677e-15	3.91668e-13
TraesCS6B02G137600	806.835	0.454292	0.0578262	7.85616	3.96076e-15	3.99499e-13
TraesCS3D02G129000	456.91	-0.349539	0.0444937	-7.85591	3.96873e-15	3.99649e-13
TraesCS2A02G260600	166.034	0.497492	0.0634491	7.8408	4.47695e-15	4.5009e-13
TraesCS1A02G403200	696.966	-0.372129	0.0474816	-7.83734	4.60207e-15	4.61916e-13
TraesCS4A02G031800	1106.63	-0.210924	0.0269144	-7.83683	4.62076e-15	4.63038e-13
TraesCS4A02G267500	545.831	-0.318518	0.040648	-7.83602	4.65049e-15	4.65261e-13
TraesCS7A02G287200	205.831	-0.446463	0.0569945	-7.83344	4.74695e-15	4.74141e-13
TraesCS2A02G263300	6191.73	0.322509	0.0411744	7.83277	4.77242e-15	4.75913e-13
TraesCS6A02G257500	679.636	-0.416676	0.0532041	-7.83165	4.81513e-15	4.79397e-13
TraesCS5B02G559300	1924.38	0.438102	0.0559903	7.8246	5.09291e-15	5.06235e-13
TraesCS2B02G181200	150.83	0.774857	0.0990796	7.82055	5.25934e-15	5.21936e-13
TraesCS2A02G338900	265.428	0.422599	0.0540684	7.816	5.45262e-15	5.40248e-13
TraesCS4A02G268700	16630.3	-0.232091	0.0296965	-7.81545	5.47674e-15	5.41766e-13
TraesCS3A02G129000	125.044	0.72867	0.0933692	7.80417	5.98925e-15	5.91515e-13
TraesCS7A02G092300	2544.36	-0.36605	0.0469312	-7.79972	6.20441e-15	6.11785e-13
TraesCS2B02G171500	159.049	-0.608724	0.0780657	-7.79758	6.31057e-15	6.21258e-13
TraesCS2D02G260700	4940.64	0.273405	0.0350725	7.79541	6.4201e-15	6.31033e-13
TraesCS1D02G346900	141.048	0.492169	0.0633185	7.77291	7.67006e-15	7.52692e-13
TraesCS3D02G200600	587.985	-0.402214	0.0517491	-7.77239	7.70175e-15	7.546e-13
TraesCS2B02G354400	4201.07	-0.374502	0.0482037	-7.76914	7.90182e-15	7.72973e-13
TraesCS4A02G319300	379.024	0.562718	0.0724348	7.76862	7.93485e-15	7.74975e-13
TraesCS1A02G049700	2499.44	0.348906	0.0449161	7.76794	7.97723e-15	7.77881e-13
TraesCS3D02G181600	971.994	-0.367682	0.0473558	-7.76425	8.21286e-15	7.99592e-13
TraesCS3B02G177600	236.592	-0.512108	0.0659724	-7.76246	8.32992e-15	8.0971e-13
TraesCS6A02G196400	504.423	-0.330904	0.0426329	-7.76169	8.38031e-15	8.13326e-13
TraesCS7A02G382200	735.489	-0.23439	0.0301996	-7.76135	8.40312e-15	8.14257e-13
TraesCS5A02G415100	145.131	-0.898132	0.115747	-7.75943	8.53116e-15	8.25366e-13
TraesCS1A02G079800	570.177	-0.492156	0.0634928	-7.75136	9.09104e-15	8.78155e-13
TraesCS6A02G355000	884.971	-0.431519	0.0556754	-7.75063	9.14385e-15	8.81873e-13
TraesCS5A02G282300	307.272	-0.356036	0.0459647	-7.74586	9.49346e-15	9.14161e-13
TraesCS1B02G231200	392.294	-0.326718	0.0422147	-7.73944	9.98567e-15	9.60058e-13
TraesCS4A02G055900	1199.89	0.646981	0.0836023	7.73879	1.00365e-14	9.63439e-13
TraesCS5A02G086900	465.726	-0.388521	0.0502133	-7.73742	1.01457e-14	9.72411e-13
TraesCS4B02G236400	116.462	0.566577	0.073245	7.73537	1.03105e-14	9.86668e-13
TraesCS4B02G397600	90.6458	1.31135	0.169572	7.73327	1.04815e-14	1.00148e-12
TraesCS6A02G212300	1449.6	-0.228713	0.0295787	-7.73236	1.05567e-14	1.0071e-12
TraesCS2D02G250400	95.6237	0.592713	0.0766558	7.73214	1.05758e-14	1.00736e-12
TraesCS7B02G081100	179.783	-0.464839	0.0601501	-7.72798	1.09264e-14	1.03916e-12
TraesCS2B02G364700	330.193	0.448703	0.0580842	7.72503	1.11825e-14	1.06188e-12
TraesCS2A02G189400	1005.67	-0.253147	0.0327778	-7.72314	1.13498e-14	1.0761e-12
TraesCS4A02G138400	684.287	-0.293105	0.0379662	-7.72014	1.16199e-14	1.10002e-12
TraesCS3A02G135300	1740.44	0.365552	0.0473544	7.71949	1.168e-14	1.10232e-12
TraesCS6B02G176200	790.953	-0.437714	0.0567015	-7.71963	1.16667e-14	1.10232e-12
TraesCS3D02G141400	372.411	-0.404615	0.0524327	-7.71683	1.19259e-14	1.1238e-12
TraesCS4D02G182600	189.524	0.470021	0.0609219	7.71514	1.20853e-14	1.13709e-12
TraesCS5D02G162200	2252.49	-0.254884	0.0330502	-7.712	1.23858e-14	1.16358e-12
TraesCS2A02G238400	489.342	-0.516896	0.0670292	-7.71151	1.2434e-14	1.16634e-12
TraesCS4B02G212200	204.806	0.638896	0.0828557	7.71095	1.24883e-14	1.16965e-12
TraesCS5A02G260600	54559	0.388268	0.0503613	7.70965	1.26159e-14	1.17981e-12
TraesCS2B02G516500	356.91	0.501278	0.0650939	7.70085	1.35159e-14	1.26206e-12
TraesCS3D02G183300	1786.79	-0.322748	0.0419119	-7.70063	1.35398e-14	1.26238e-12
TraesCS2B02G196100	12869.4	0.29837	0.0387656	7.69677	1.3955e-14	1.29912e-12
TraesCS5B02G481600	388.831	0.442796	0.057572	7.69118	1.45784e-14	1.35511e-12
TraesCS5D02G040600	355.393	-0.377881	0.0491455	-7.68903	1.48251e-14	1.37596e-12
TraesCS1A02G378900	271.545	-0.597945	0.077796	-7.68606	1.51738e-14	1.40621e-12
TraesCS7D02G532700	232.791	0.397365	0.0517082	7.68477	1.53275e-14	1.41833e-12
TraesCS1D02G111700	604.557	-0.307516	0.0400228	-7.68351	1.54787e-14	1.43016e-12
TraesCS4A02G167300	1315.46	-0.258985	0.0337266	-7.67896	1.60387e-14	1.47969e-12
TraesCS1B02G201400	4407.55	-0.329087	0.0428608	-7.67805	1.6153e-14	1.48358e-12
TraesCS4D02G212400	83.7933	0.820158	0.106818	7.67813	1.61431e-14	1.48358e-12
TraesCS5A02G389800	637.043	0.34168	0.0444989	7.67839	1.61096e-14	1.48358e-12
TraesCS7D02G045900	477.138	0.353688	0.0460784	7.67579	1.64404e-14	1.50772e-12
TraesCS1A02G174000	1658.05	-0.277313	0.0361315	-7.67511	1.65283e-14	1.51353e-12
TraesCS4A02G386200	248.856	0.342407	0.0446287	7.67235	1.68877e-14	1.54415e-12
TraesCS5B02G365800	274.523	0.40275	0.0525234	7.66801	1.74681e-14	1.59485e-12
TraesCS2B02G105100	314.815	0.551461	0.0719366	7.66593	1.77546e-14	1.61861e-12
TraesCS6A02G314200	229.074	0.425162	0.0554685	7.66493	1.7893e-14	1.62882e-12
TraesCS3A02G442100	454.037	0.343344	0.0447966	7.66452	1.79507e-14	1.63166e-12
TraesCS1A02G097600	434.812	0.404111	0.052867	7.64391	2.10717e-14	1.91253e-12
TraesCS5B02G459100	62.523	1.21002	0.158351	7.64143	2.1482e-14	1.9469e-12
TraesCS5A02G444400	636.678	0.391192	0.0511952	7.64119	2.1522e-14	1.94767e-12
TraesCS7D02G415100	695.422	-0.32372	0.0423665	-7.64094	2.15643e-14	1.94863e-12
TraesCS1B02G443200	5772.46	-0.248505	0.0325252	-7.64039	2.16559e-14	1.95404e-12
TraesCS5A02G372900	7132.01	0.361229	0.0472803	7.64016	2.16952e-14	1.95471e-12
TraesCS5B02G171500	392.521	-0.436125	0.0570846	-7.63997	2.17268e-14	1.95471e-12
TraesCS3A02G530400	7187.83	0.429862	0.0562743	7.6387	2.19428e-14	1.97127e-12
TraesCS3A02G206300	272.962	-0.381472	0.0499761	-7.63308	2.29207e-14	2.05612e-12
TraesCS1D02G128800	5114.07	-0.334203	0.0437948	-7.6311	2.32753e-14	2.0849e-12
TraesCS1D02G199800	256.399	0.592634	0.0776716	7.62999	2.34775e-14	2.09996e-12
TraesCS7D02G015100	96.729	0.78663	0.103119	7.62838	2.37728e-14	2.12329e-12
TraesCS4D02G198500	3897.59	0.637678	0.0836217	7.62575	2.42612e-14	2.16378e-12
TraesCS6D02G238800	558.64	-0.435561	0.0571349	-7.62337	2.47144e-14	2.20101e-12
TraesCS7D02G262800	5611.17	-0.265894	0.0349092	-7.61673	2.60192e-14	2.31386e-12
TraesCS7B02G230500	560.924	0.361576	0.0474921	7.61339	2.66993e-14	2.37092e-12
TraesCS5D02G196300	176.061	-1.45241	0.190793	-7.61251	2.68833e-14	2.38383e-12
TraesCS2A02G145500	977.212	-0.292847	0.0384708	-7.61219	2.695e-14	2.38631e-12
TraesCSU02G067300	1453.15	-0.249872	0.0328292	-7.61127	2.71412e-14	2.39979e-12
TraesCS6A02G155700	161.107	-0.473768	0.0622501	-7.61072	2.72578e-14	2.40665e-12
TraesCS5D02G495000	691.821	0.470959	0.0619039	7.60791	2.78559e-14	2.45594e-12
TraesCS3A02G128000	415.454	-0.396506	0.0521193	-7.60766	2.79109e-14	2.45728e-12
TraesCS6D02G147700	486.317	-0.378941	0.0498165	-7.60674	2.811e-14	2.47128e-12
TraesCS6B02G415600	126.894	-0.626608	0.0823954	-7.60489	2.85153e-14	2.50334e-12
TraesCS5B02G476800	2331.24	-0.183378	0.0241316	-7.5991	2.98189e-14	2.61405e-12
TraesCS1B02G097800	646.768	-0.451883	0.0594805	-7.59717	3.02682e-14	2.64967e-12
TraesCS3B02G224000	1232.02	-0.263287	0.034663	-7.59561	3.06335e-14	2.67784e-12
TraesCS1D02G121000	1513.17	0.432308	0.0569197	7.59505	3.07666e-14	2.68567e-12
TraesCS4D02G023400	501.537	-0.338015	0.0445122	-7.59375	3.10784e-14	2.70906e-12
TraesCS3A02G499000	205.58	0.508314	0.0669444	7.59308	3.12399e-14	2.71929e-12
TraesCS2A02G298700	20.0232	2.2681	0.298781	7.59117	3.17021e-14	2.75563e-12
TraesCS5D02G241200	1930.2	0.42927	0.0565753	7.58759	3.25905e-14	2.82886e-12
TraesCS2A02G358000	444.922	-0.366855	0.0483526	-7.58706	3.27234e-14	2.83639e-12
TraesCS3B02G143500	893.729	-0.27705	0.0365178	-7.5867	3.28145e-14	2.8403e-12
TraesCS4A02G147500	720.506	-0.443432	0.0584689	-7.58406	3.34902e-14	2.89167e-12
TraesCS4B02G274200	1060.28	-0.246026	0.0324401	-7.58402	3.35019e-14	2.89167e-12
TraesCS2D02G263100	45.9759	1.11555	0.147112	7.583	3.37657e-14	2.91037e-12
TraesCS3A02G078200	1443.83	-0.456341	0.0601933	-7.58126	3.42221e-14	2.94559e-12
TraesCS7B02G009200	920.567	-0.275282	0.0363135	-7.58072	3.4364e-14	2.95368e-12
TraesCS1D02G111000	201.189	0.799828	0.105574	7.57599	3.56411e-14	3.05918e-12
TraesCS6B02G236700	644.601	0.423866	0.0559733	7.57263	3.6573e-14	3.1348e-12
TraesCS1B02G477500	2930.39	-0.30527	0.0403159	-7.57196	3.67635e-14	3.14675e-12
TraesCS3D02G038300	2481.38	0.388224	0.0512751	7.5714	3.69229e-14	3.15601e-12
TraesCS7B02G235900	472.334	0.455069	0.060131	7.56795	3.79151e-14	3.23633e-12
TraesCS5D02G516500	179.971	-0.74527	0.0985115	-7.56531	3.86945e-14	3.29829e-12
TraesCS3B02G042600	546.523	0.334591	0.0442324	7.5644	3.89672e-14	3.31695e-12
TraesCS1D02G136900	1481.63	-0.271735	0.0359336	-7.56212	3.96537e-14	3.37073e-12
TraesCS2D02G111200	306.456	-0.324114	0.0429251	-7.5507	4.32938e-14	3.66945e-12
TraesCS2D02G379000	483.226	-0.641944	0.0850196	-7.55054	4.33465e-14	3.66945e-12
TraesCS5A02G242600	171.03	0.828738	0.109755	7.55078	4.32671e-14	3.66945e-12
TraesCS7B02G086300	44.7674	0.875519	0.115961	7.55012	4.34841e-14	3.67604e-12
TraesCS7D02G319100	329.434	-0.389593	0.0516176	-7.54768	4.43086e-14	3.74061e-12
TraesCS6A02G021200	346.977	0.445207	0.059001	7.54575	4.49685e-14	3.79113e-12
TraesCS3B02G042400	868.718	0.385701	0.05113	7.54353	4.57411e-14	3.851e-12
TraesCS4A02G175100	140.357	1.03553	0.137292	7.54258	4.60747e-14	3.8738e-12
TraesCS2A02G149300	394.485	-0.396053	0.0525279	-7.53987	4.70433e-14	3.94984e-12
TraesCS4A02G349100	1481.26	0.327273	0.0434514	7.53194	4.99933e-14	4.19182e-12
TraesCS4D02G190600	1825.89	-0.294594	0.0391158	-7.53132	5.02305e-14	4.20028e-12
TraesCS6D02G236100	220.604	-0.430127	0.0571117	-7.53133	5.02274e-14	4.20028e-12
TraesCS1B02G172300	809.996	0.625098	0.083016	7.52984	5.08007e-14	4.23375e-12
TraesCS3A02G085200	5730.86	0.264159	0.0350821	7.52975	5.08368e-14	4.23375e-12
TraesCS6B02G267600	549.777	-0.390472	0.0518565	-7.52986	5.07954e-14	4.23375e-12
TraesCS7A02G261600	4361.03	-0.276255	0.0367206	-7.52316	5.34685e-14	4.4469e-12
TraesCS7A02G358400	5268.54	-0.29508	0.039232	-7.5214	5.41929e-14	4.50108e-12
TraesCS3D02G326900	12629.3	0.418565	0.0556625	7.51971	5.48992e-14	4.55361e-12
TraesCS4B02G355800	858.26	0.442758	0.0588844	7.5191	5.51543e-14	4.56861e-12
TraesCS3A02G407700	477.713	0.661937	0.0881334	7.51062	5.88461e-14	4.86788e-12
TraesCS1A02G139600	799.019	-0.262163	0.0349125	-7.50914	5.95168e-14	4.91676e-12
TraesCS3A02G196300	1016.39	-0.395749	0.0527099	-7.50805	6.00144e-14	4.94461e-12
TraesCS7D02G086300	964.542	-0.398573	0.0530849	-7.50822	5.99382e-14	4.94461e-12
TraesCS6D02G166200	1337.32	-0.25141	0.033498	-7.50524	6.13181e-14	5.04528e-12
TraesCS1D02G040700	365.383	0.441517	0.0588627	7.50079	6.34331e-14	5.21234e-12
TraesCS3D02G114900	4.66967	4.19205	0.558921	7.50025	6.36958e-14	5.22696e-12
TraesCS5A02G106300	1225	-0.331032	0.0441388	-7.4998	6.3914e-14	5.23789e-12
TraesCS7D02G336500	336.914	0.43433	0.0579208	7.49869	6.44576e-14	5.27542e-12
TraesCS6D02G188300	883.239	-0.321402	0.0428769	-7.49591	6.58394e-14	5.38137e-12
TraesCS4D02G040000	1308.79	0.321674	0.0429587	7.48799	6.99372e-14	5.70873e-12
TraesCS6A02G272900	452.443	-0.470414	0.0628359	-7.48638	7.07974e-14	5.7713e-12
TraesCS2A02G298800	814.962	-0.25503	0.0341036	-7.4781	7.54073e-14	6.13087e-12
TraesCS7B02G183800	1176.31	-0.426088	0.0569776	-7.47817	7.53673e-14	6.13087e-12
TraesCS4B02G045500	14754.1	-0.217785	0.0291266	-7.47719	7.59287e-14	6.16513e-12
TraesCS7A02G051000	637.225	0.333645	0.0446236	7.47687	7.61138e-14	6.17203e-12
TraesCS6A02G153300	248.301	0.35895	0.0480121	7.47626	7.64703e-14	6.19279e-12
TraesCS7B02G246800	581.13	-0.402128	0.0537907	-7.47579	7.67398e-14	6.20646e-12
TraesCS2B02G296400	491.285	0.336875	0.0450703	7.47442	7.75446e-14	6.2589e-12
TraesCS7D02G199700	5609.52	0.266137	0.0356068	7.47434	7.75913e-14	6.2589e-12
TraesCSU02G124900	1270.48	-0.196689	0.0263183	-7.47349	7.80976e-14	6.29151e-12
TraesCS1D02G356900	481.239	-0.300235	0.0401843	-7.47145	7.93136e-14	6.3728e-12
TraesCS5D02G384000	713.758	0.276335	0.0369847	7.4716	7.92227e-14	6.3728e-12
TraesCS7A02G088100	643.886	-0.247615	0.0331542	-7.46856	8.10741e-14	6.50577e-12
TraesCS4B02G314900	680.197	-0.263154	0.0352416	-7.46715	8.19529e-14	6.56774e-12
TraesCS2A02G129600	96.6169	-0.82638	0.1107	-7.46505	8.3268e-14	6.65582e-12
TraesCS4B02G227200	3120.26	-0.245647	0.0329058	-7.46517	8.31952e-14	6.65582e-12
TraesCS6D02G161700	383.133	0.449903	0.0602973	7.46142	8.55962e-14	6.83306e-12
TraesCS5D02G261500	94.8329	0.75319	0.101083	7.4512	9.24975e-14	7.37443e-12
TraesCS4D02G365000	215.141	0.54307	0.0728938	7.45016	9.32279e-14	7.42306e-12
TraesCS6B02G318200	83.1255	0.658201	0.0883526	7.44972	9.35414e-14	7.43841e-12
TraesCS3A02G085400	127.443	-0.564502	0.0757894	-7.4483	9.4553e-14	7.50917e-12
TraesCS4D02G109200	11266.9	-0.273025	0.0366672	-7.44603	9.61897e-14	7.62932e-12
TraesCS3B02G131500	1041.5	-0.338319	0.04545	-7.44375	9.78652e-14	7.75224e-12
TraesCS7A02G251800	15.2715	2.13846	0.28732	7.44279	9.85803e-14	7.79885e-12
TraesCS5A02G429400	662.885	-0.38027	0.0511077	-7.44056	1.00259e-13	7.92146e-12
TraesCS3B02G263100	204.018	-1.0651	0.14324	-7.4358	1.03936e-13	8.20153e-12
TraesCS1D02G147600	2849.85	-0.229622	0.0309046	-7.43003	1.08571e-13	8.55626e-12
TraesCS3A02G303100	530.884	-0.345569	0.0465223	-7.42803	1.10223e-13	8.67539e-12
TraesCS3D02G420400	575.543	0.376394	0.0506828	7.42645	1.1155e-13	8.76862e-12
TraesCS3B02G234900	759.221	0.489584	0.0659283	7.42601	1.11923e-13	8.78671e-12
TraesCS4B02G111500	9798.96	-0.318993	0.0429592	-7.42548	1.12375e-13	8.81101e-12
TraesCS7D02G110900	262.762	0.405555	0.0546364	7.4228	1.14673e-13	8.97974e-12
TraesCS1B02G192300	1017.71	-0.236473	0.0318761	-7.41849	1.18463e-13	9.26473e-12
TraesCS2A02G161400	345.667	0.469031	0.0632369	7.41705	1.19759e-13	9.35429e-12
TraesCS1D02G248900	948.518	0.277804	0.0374581	7.4164	1.20344e-13	9.38804e-12
TraesCS6D02G137100	463.141	-0.312515	0.0421488	-7.41456	1.22028e-13	9.50742e-12
TraesCS5B02G288500	140.999	0.604932	0.0816748	7.40659	1.29585e-13	1.00834e-11
TraesCS2B02G206500	306.578	-0.394228	0.0532648	-7.40128	1.34875e-13	1.04818e-11
TraesCS7B02G167300	1673.45	-0.416455	0.0562739	-7.4005	1.35669e-13	1.05303e-11
TraesCS5A02G218000	157.011	0.537811	0.0726897	7.39873	1.37498e-13	1.06588e-11
TraesCS2B02G261500	542.932	-0.293876	0.0397224	-7.39824	1.38004e-13	1.06846e-11
TraesCS3B02G218200	344.25	-0.288389	0.0389845	-7.39752	1.38753e-13	1.07291e-11
TraesCS2D02G331500	1870.2	-0.325938	0.0440634	-7.39703	1.39269e-13	1.0742e-11
TraesCS4A02G269400	387.336	-0.487558	0.0659119	-7.39711	1.3918e-13	1.0742e-11
TraesCS5B02G516100	3347.22	-0.380645	0.0514807	-7.39394	1.42542e-13	1.09807e-11
TraesCS2B02G249500	598.639	-0.319677	0.0432414	-7.39284	1.43729e-13	1.10584e-11
TraesCS5D02G066000	657.699	-0.334792	0.0453063	-7.38952	1.47355e-13	1.13232e-11
TraesCS7D02G244900	27.8454	0.988422	0.133825	7.38594	1.51375e-13	1.16176e-11
TraesCS2A02G119400	4777.41	-0.362137	0.049036	-7.38512	1.52315e-13	1.16752e-11
TraesCS1B02G144300	2469.8	-0.411123	0.0556783	-7.3839	1.5372e-13	1.17682e-11
TraesCS2A02G322400	924.575	0.262081	0.0354946	7.38368	1.53969e-13	1.17727e-11
TraesCS5D02G173800	1051.48	-0.313155	0.0424145	-7.38319	1.54536e-13	1.18014e-11
TraesCS2B02G371200	407.067	0.30145	0.0408392	7.38139	1.56645e-13	1.19477e-11
TraesCS6B02G199600	135.286	0.594031	0.0805024	7.37905	1.59425e-13	1.21447e-11
TraesCS4B02G375600	829.58	0.732714	0.0993118	7.37791	1.60793e-13	1.22337e-11
TraesCS1A02G395200	1283.57	0.54817	0.0743048	7.37732	1.61513e-13	1.22734e-11
TraesCS3D02G327800	2736.14	0.285036	0.0386398	7.37676	1.62185e-13	1.23093e-11
TraesCS3B02G357800	273.842	0.46053	0.0624434	7.37517	1.6414e-13	1.24423e-11
TraesCS6A02G047900	9105.02	-0.327786	0.0444518	-7.37398	1.65613e-13	1.25386e-11
TraesCS5A02G533800	164.605	0.515051	0.0698522	7.37343	1.66292e-13	1.25745e-11
TraesCS5A02G467400	5528.53	-0.271524	0.036836	-7.37114	1.6917e-13	1.27765e-11
TraesCS7A02G065500	1290	-0.240642	0.0326569	-7.3688	1.7217e-13	1.29871e-11
TraesCS2A02G176100	685.247	0.461723	0.0626663	7.36796	1.7326e-13	1.30534e-11
TraesCS5B02G243100	106.76	-0.782908	0.106269	-7.36726	1.74174e-13	1.31062e-11
TraesCS4D02G026900	782.986	0.305547	0.0414969	7.36313	1.79651e-13	1.35019e-11
TraesCS4D02G185000	757.944	-0.330758	0.0449328	-7.36116	1.82321e-13	1.36859e-11
TraesCS3D02G017400	476.177	0.71389	0.0969871	7.36067	1.82992e-13	1.37195e-11
TraesCS5B02G257900	965.875	-0.268027	0.0364379	-7.35571	1.89909e-13	1.42208e-11
TraesCS2D02G050300	985.105	0.25383	0.0345428	7.34827	2.00785e-13	1.49987e-11
TraesCS6A02G146400	331.15	0.431889	0.0587735	7.34837	2.00643e-13	1.49987e-11
TraesCS7A02G160000	5757.93	0.418808	0.0570226	7.34459	2.06383e-13	1.53983e-11
TraesCS3A02G289600	981.991	-0.31915	0.0434603	-7.34347	2.08118e-13	1.5509e-11
TraesCS4D02G151200	1223.69	-0.282221	0.0384676	-7.3366	2.19094e-13	1.63072e-11
TraesCS4A02G171800	2301.25	-0.227312	0.0309981	-7.33309	2.24898e-13	1.6719e-11
TraesCS4A02G260700	443.002	0.400452	0.0546166	7.33205	2.26652e-13	1.6829e-11
TraesCS5A02G416000	318.174	0.582004	0.079404	7.32965	2.30746e-13	1.71124e-11
TraesCS3B02G244400	386.113	0.34521	0.0471067	7.32827	2.33151e-13	1.727e-11
TraesCS7B02G020000	98.841	0.55323	0.0755211	7.32551	2.3799e-13	1.76073e-11
TraesCS4D02G221500	109.32	-0.667235	0.0911225	-7.3224	2.43574e-13	1.79988e-11
TraesCS7D02G548000	957.351	-0.294353	0.0402049	-7.32132	2.45543e-13	1.81225e-11
TraesCS7D02G445800	271.762	0.477565	0.0652483	7.3192	2.49455e-13	1.83892e-11
TraesCS2A02G163700	5271.47	-0.333999	0.0456635	-7.31435	2.58627e-13	1.9013e-11
TraesCS2B02G281400	173.078	0.560189	0.0765888	7.31424	2.58842e-13	1.9013e-11
TraesCS7B02G062700	4762.1	-0.469813	0.0642315	-7.31437	2.58587e-13	1.9013e-11
TraesCS2B02G528100	536.641	-0.294585	0.0402774	-7.31391	2.59478e-13	1.90144e-11
TraesCS2D02G306800	1454.69	-0.257931	0.035265	-7.31407	2.59174e-13	1.90144e-11
TraesCS3A02G341000	4034.53	-0.327936	0.0448658	-7.30927	2.68597e-13	1.96592e-11
TraesCS1A02G044500	918.181	-0.325395	0.0445302	-7.30728	2.72608e-13	1.99292e-11
TraesCS6B02G148200	2807.42	-0.255555	0.0349743	-7.30695	2.73272e-13	1.9954e-11
TraesCS2B02G214800	346.456	-0.305096	0.0417595	-7.30603	2.75155e-13	2.00677e-11
TraesCS7D02G049800	20.1083	1.27375	0.174347	7.30581	2.75608e-13	2.0077e-11
TraesCS3D02G260200	61.9811	0.982381	0.134477	7.3052	2.76845e-13	2.01433e-11
TraesCS6B02G340000	265.893	0.43026	0.0589154	7.303	2.81411e-13	2.04514e-11
TraesCS5A02G171900	494.684	0.321957	0.0441065	7.29954	2.88753e-13	2.09602e-11
TraesCS5D02G106300	942.754	-0.238759	0.0327115	-7.29892	2.9008e-13	2.10318e-11
TraesCS1D02G260400	374.673	-0.352752	0.0483387	-7.29752	2.93127e-13	2.12278e-11
TraesCS4B02G034500	55.7621	0.87622	0.12009	7.29635	2.95682e-13	2.13877e-11
TraesCS4D02G148600	845.377	-0.291278	0.0399404	-7.29282	3.03537e-13	2.19301e-11
TraesCS1B02G219200	1014.23	0.384873	0.0527855	7.29127	3.07038e-13	2.21571e-11
TraesCS6D02G194700	243.897	0.569217	0.078081	7.29008	3.09776e-13	2.23285e-11
TraesCS7A02G331300	2152.84	0.53717	0.0737853	7.28018	3.33365e-13	2.40007e-11
TraesCS5D02G551800	1058	0.429578	0.0590202	7.2785	3.3755e-13	2.42737e-11
TraesCS2A02G278700	382.914	0.422913	0.0581166	7.27698	3.41383e-13	2.44921e-11
TraesCS6D02G195300	1406.11	-0.218725	0.0300566	-7.27711	3.41044e-13	2.44921e-11
TraesCS1A02G184500	550.568	-0.272573	0.0374632	-7.27575	3.4449e-13	2.46863e-11
TraesCS6B02G224900	491.484	-0.421448	0.05796	-7.27135	3.55909e-13	2.5475e-11
TraesCS5A02G364300	330.32	-0.344552	0.0473978	-7.26937	3.61179e-13	2.58222e-11
TraesCS3D02G208200	232.798	0.651222	0.0896061	7.26761	3.65898e-13	2.61292e-11
TraesCS3A02G191100	88.9754	0.717795	0.0987752	7.26695	3.67696e-13	2.62273e-11
TraesCS5A02G182300	124.077	0.696956	0.095947	7.26397	3.75905e-13	2.67818e-11
TraesCS2A02G207700	320.058	0.379894	0.0523015	7.26353	3.77103e-13	2.68361e-11
TraesCS1B02G479100	587.939	-0.244292	0.0336381	-7.26238	3.8035e-13	2.7036e-11
TraesCS7D02G103800	2562.01	0.562208	0.0774188	7.26191	3.81654e-13	2.70974e-11
TraesCS4B02G165100	459.962	-0.357857	0.0493	-7.25876	3.90652e-13	2.77043e-11
TraesCS7A02G326300	425.084	-0.402319	0.0554299	-7.25816	3.92387e-13	2.77954e-11
TraesCS7B02G201500	46.8564	1.0048	0.138441	7.25798	3.92911e-13	2.78006e-11
TraesCS2A02G344900	538.383	-0.353152	0.0486712	-7.25587	3.99102e-13	2.82062e-11
TraesCS4A02G435600	236.025	0.423169	0.0583227	7.25565	3.99723e-13	2.82178e-11
TraesCS3D02G188800	1611.32	-0.284701	0.0392636	-7.25101	4.13665e-13	2.91686e-11
TraesCS1D02G045100	1161.93	-0.343195	0.0473568	-7.247	4.26089e-13	2.9976e-11
TraesCS5D02G384100	1525.21	-0.359353	0.0495864	-7.24701	4.26075e-13	2.9976e-11
TraesCS2A02G050700	173.537	0.642966	0.0887287	7.24642	4.27926e-13	3.0071e-11
TraesCS5D02G541900	300.993	0.367105	0.0506647	7.24577	4.29982e-13	3.0181e-11
TraesCS3A02G113900	156.917	1.79704	0.248323	7.23671	4.59691e-13	3.22296e-11
TraesCS7A02G263300	769.802	-0.235589	0.0325829	-7.23045	4.81394e-13	3.37129e-11
TraesCS2A02G208000	465.678	-0.287615	0.0397925	-7.22786	4.90673e-13	3.43237e-11
TraesCS2A02G587900	206.192	-0.814557	0.112739	-7.22513	5.0061e-13	3.49791e-11
TraesCS1A02G216900	730.657	-0.27498	0.0380716	-7.22272	5.09595e-13	3.55666e-11
TraesCS2A02G421400	137.906	-0.806126	0.111629	-7.22144	5.14384e-13	3.58603e-11
TraesCS5B02G284800	2360.75	-0.217226	0.0301023	-7.21626	5.34367e-13	3.72112e-11
TraesCS7A02G342900	490.87	0.369072	0.0511541	7.21491	5.39704e-13	3.75405e-11
TraesCS2B02G068800	275.747	-0.758703	0.10517	-7.21409	5.42975e-13	3.77254e-11
TraesCS2A02G167000	249.255	-0.396844	0.0550131	-7.21362	5.44825e-13	3.78114e-11
TraesCS5B02G187400	905.156	-0.380987	0.0528226	-7.21258	5.49007e-13	3.80587e-11
TraesCS2A02G125500	3233.35	-0.358867	0.0497616	-7.21172	5.5249e-13	3.82571e-11
TraesCS6B02G440200	1443.94	-0.253035	0.035111	-7.20671	5.73207e-13	3.96027e-11
TraesCS7D02G261900	52.1348	-1.4244	0.197646	-7.20683	5.72681e-13	3.96027e-11
TraesCS5D02G172700	4139.47	-0.23287	0.0323139	-7.20649	5.74145e-13	3.9623e-11
TraesCS1A02G112800	286.87	0.545106	0.0756537	7.20527	5.79275e-13	3.99324e-11
TraesCS6B02G052900	1255.67	0.274172	0.0380558	7.20448	5.82675e-13	4.01219e-11
TraesCS1A02G158400	212.552	-0.4465	0.0620049	-7.20105	5.97515e-13	4.10979e-11
TraesCS1D02G436800	884.701	-0.217921	0.0302677	-7.19979	6.03059e-13	4.14329e-11
TraesCS6D02G251100	1451.59	-0.292046	0.0405662	-7.19924	6.05473e-13	4.15525e-11
TraesCS4A02G381900	152.595	0.578992	0.0804325	7.19848	6.08873e-13	4.17393e-11
TraesCS3A02G193500	1051.65	-0.280716	0.039006	-7.19673	6.16721e-13	4.22303e-11
TraesCS7B02G444600	326.037	-0.299596	0.0416319	-7.19632	6.18602e-13	4.23121e-11
TraesCS6B02G192200	758.85	-0.287077	0.0398932	-7.19614	6.19431e-13	4.23218e-11
TraesCS7B02G350600	332.512	0.428407	0.0595422	7.19502	6.24532e-13	4.26231e-11
TraesCS5D02G219500	1188.16	0.364555	0.0506879	7.19215	6.3778e-13	4.34791e-11
TraesCS4D02G348300	185.538	0.405441	0.0563815	7.19104	6.43013e-13	4.37874e-11
TraesCS1D02G211700	559.586	-0.272228	0.0378612	-7.19017	6.47111e-13	4.40178e-11
TraesCS1D02G352900	246.876	0.441557	0.0614183	7.18934	6.51039e-13	4.42362e-11
TraesCS1D02G208900	1370.23	0.22653	0.0315113	7.18883	6.5347e-13	4.43525e-11
TraesCS7D02G204000	988.349	-0.263825	0.0367028	-7.18815	6.56735e-13	4.45251e-11
TraesCS7D02G278500	4326.94	-0.209276	0.0291242	-7.18562	6.6901e-13	4.53074e-11
TraesCS5B02G404100	614.087	0.476512	0.0663256	7.18443	6.74863e-13	4.56536e-11
TraesCS5B02G161900	425.394	-0.344062	0.0479407	-7.17682	7.13526e-13	4.82162e-11
TraesCS2B02G268500	118.632	0.506102	0.0705416	7.17452	7.25636e-13	4.89808e-11
TraesCS7B02G469400	935.464	-0.311798	0.0434603	-7.17432	7.26664e-13	4.89965e-11
TraesCS5A02G341300	804.331	-0.273329	0.0381149	-7.17119	7.43488e-13	5.00762e-11
TraesCS7B02G318700	30.3282	1.02614	0.143111	7.1702	7.48887e-13	5.03847e-11
TraesCS6D02G358100	229.365	0.52229	0.0728433	7.17004	7.49757e-13	5.03883e-11
TraesCS6A02G310200	406.685	-0.37393	0.0521987	-7.1636	7.85861e-13	5.27571e-11
TraesCS2B02G127700	820.96	-0.285368	0.0398636	-7.1586	8.15066e-13	5.46582e-11
TraesCS5D02G480200	5477.81	-0.252941	0.0353429	-7.15677	8.25981e-13	5.533e-11
TraesCS5D02G214500	199.324	0.504932	0.0705715	7.1549	8.3736e-13	5.60313e-11
TraesCS5A02G357200	6971.64	-0.308566	0.0431449	-7.15186	8.56072e-13	5.72213e-11
TraesCS3A02G236700	350.912	-0.911606	0.127478	-7.15106	8.61074e-13	5.73689e-11
TraesCS4A02G290200	1465.22	0.544233	0.0761033	7.15125	8.59919e-13	5.73689e-11
TraesCS7A02G256700	359.067	0.407581	0.0569949	7.15119	8.60317e-13	5.73689e-11
TraesCS4D02G132600	1363.3	-0.255055	0.0356703	-7.15035	8.65586e-13	5.75451e-11
TraesCS4D02G273500	121.598	0.621838	0.0869653	7.15042	8.65132e-13	5.75451e-11
TraesCS3B02G190600	429.433	0.368928	0.051609	7.14851	8.77262e-13	5.82585e-11
TraesCS1D02G134800	160.523	-0.402743	0.0563715	-7.14443	9.03689e-13	5.98845e-11
TraesCS3A02G092400	87.4137	0.590416	0.0826387	7.14455	9.02937e-13	5.98845e-11
TraesCS1D02G372000	709.401	-0.31846	0.044607	-7.13924	9.38495e-13	6.21241e-11
TraesCS3A02G288900	339.188	0.520221	0.0728835	7.13771	9.48966e-13	6.27499e-11
TraesCS1B02G478700	750.082	-0.410871	0.0575705	-7.13683	9.5505e-13	6.30845e-11
TraesCS4B02G203300	401.524	-0.626633	0.0878323	-7.13442	9.71947e-13	6.41318e-11
TraesCS2A02G364900	452.425	0.287374	0.0402994	7.13098	9.96541e-13	6.56843e-11
TraesCS7D02G396000	232.625	-0.376342	0.0527839	-7.12987	1.00463e-12	6.61464e-11
TraesCS5B02G198400	36.7219	0.991829	0.139163	7.12709	1.02515e-12	6.74259e-11
TraesCS6D02G130500	4358.67	-0.284378	0.0399081	-7.12582	1.03464e-12	6.79774e-11
TraesCS2A02G191000	903.987	-0.256276	0.0359683	-7.12506	1.04037e-12	6.82718e-11
TraesCS5B02G111400	1298.51	-0.291722	0.0409439	-7.12493	1.04134e-12	6.82718e-11
TraesCS1A02G016203	19.3124	1.48136	0.207922	7.1246	1.04381e-12	6.83609e-11
TraesCS4D02G084200	934.416	0.282542	0.0396665	7.12293	1.05656e-12	6.9123e-11
TraesCS5A02G476800	576.455	0.323593	0.0454432	7.12082	1.07284e-12	7.01133e-11
TraesCS2B02G260600	1019.97	-0.263226	0.0369721	-7.11959	1.08251e-12	7.06707e-11
TraesCS3B02G251700	555.056	0.343648	0.0483087	7.11359	1.13064e-12	7.37342e-11
TraesCS1A02G156500	387.489	-0.453247	0.0637349	-7.11145	1.14832e-12	7.48082e-11
TraesCS1A02G444200	859.373	-0.435702	0.061276	-7.11048	1.15636e-12	7.52526e-11
TraesCS2D02G143600	206.155	0.664769	0.0935135	7.1088	1.17057e-12	7.6097e-11
TraesCS4A02G119000	161.417	0.856263	0.120545	7.10324	1.21865e-12	7.90559e-11
TraesCS4D02G151900	9239.54	-0.364577	0.0513248	-7.10333	1.21789e-12	7.90559e-11
TraesCS5B02G005300	131.429	1.03451	0.145747	7.09799	1.26584e-12	8.2031e-11
TraesCS7B02G095400	381.746	-0.367044	0.0517127	-7.09774	1.26812e-12	8.20921e-11
TraesCS4D02G245300	526.59	-0.362469	0.0511141	-7.09137	1.3279e-12	8.58721e-11
TraesCS6B02G082500	4944.87	-0.518335	0.0731098	-7.08982	1.34289e-12	8.67504e-11
TraesCS2B02G463700	80.2629	0.727948	0.102726	7.08632	1.3773e-12	8.88796e-11
TraesCS3B02G251100	934.29	-0.315597	0.0445398	-7.08572	1.38325e-12	8.91702e-11
TraesCS7B02G153100	5225.7	0.358912	0.0506603	7.08468	1.39369e-12	8.97498e-11
TraesCS5B02G120400	1267.03	-0.31827	0.0449593	-7.07908	1.4512e-12	9.33553e-11
TraesCS7A02G561600	291.542	0.335297	0.0473764	7.0773	1.46994e-12	9.44627e-11
TraesCS5B02G478300	21.6279	3.31855	0.469145	7.07361	1.50953e-12	9.69055e-11
TraesCS6B02G344200	210.49	0.404959	0.0572615	7.0721	1.52605e-12	9.7864e-11
TraesCS2D02G087400	469.774	0.336661	0.0476152	7.07046	1.54426e-12	9.8929e-11
TraesCS3B02G459900	2155.79	0.528645	0.0747865	7.06872	1.56371e-12	1.00071e-10
TraesCS1B02G068500	1249.28	-0.538811	0.0762294	-7.06829	1.56859e-12	1.00279e-10
TraesCS4D02G022000	4548.27	0.418889	0.0592697	7.06751	1.57741e-12	1.00739e-10
TraesCS7D02G221000	223.614	-0.510108	0.0721862	-7.06657	1.58814e-12	1.01319e-10
TraesCS3A02G140200	145.872	0.607189	0.0859608	7.06355	1.62297e-12	1.03433e-10
TraesCS4A02G179700	655.687	0.484594	0.0686074	7.06329	1.6261e-12	1.03526e-10
TraesCS7D02G163900	872.965	0.316508	0.0448124	7.06294	1.63011e-12	1.03674e-10
TraesCS5B02G460700	139.028	0.493331	0.0698555	7.06217	1.6392e-12	1.04145e-10
TraesCS6A02G330200	442.359	-0.304923	0.0431891	-7.06018	1.66282e-12	1.05537e-10
TraesCS5B02G523600	250.433	0.507829	0.0719344	7.05962	1.66955e-12	1.05817e-10
TraesCS7B02G165900	40.534	0.860597	0.121906	7.05953	1.67067e-12	1.05817e-10
TraesCS5A02G552700	1460.47	-0.216624	0.0306878	-7.05898	1.67729e-12	1.06082e-10
TraesCS6B02G169300	5371.46	-0.306973	0.0434873	-7.0589	1.67829e-12	1.06082e-10
TraesCS6A02G187800	1542.49	-0.294173	0.0416854	-7.05696	1.70185e-12	1.07461e-10
TraesCS4A02G321300	693.561	0.394963	0.0559972	7.05327	1.74767e-12	1.10241e-10
TraesCS5B02G290600	1018.35	-0.346156	0.0490962	-7.05057	1.78189e-12	1.12284e-10
TraesCS3D02G144400	78.1637	-0.70551	0.100085	-7.04913	1.80044e-12	1.13338e-10
TraesCS5B02G331100	677.065	-0.349392	0.0495727	-7.04807	1.81416e-12	1.14085e-10
TraesCS7A02G090500	855.895	-0.350789	0.0497735	-7.0477	1.81895e-12	1.14269e-10
TraesCS3D02G328300	1664.58	-0.310523	0.0440717	-7.04586	1.84322e-12	1.15676e-10
TraesCS4D02G047600	3665.25	-0.268537	0.0381146	-7.04552	1.84768e-12	1.15838e-10
TraesCS1D02G091000	1007.32	-0.238877	0.0339141	-7.04357	1.87371e-12	1.17351e-10
TraesCS3D02G008500	211.499	0.606622	0.0861276	7.04329	1.87751e-12	1.17469e-10
TraesCS6D02G376600	42.2024	0.969708	0.137702	7.04207	1.89407e-12	1.18385e-10
TraesCS5A02G291500	1207.69	-0.284631	0.0404227	-7.04137	1.90353e-12	1.18856e-10
TraesCS7B02G139300	24.0074	1.63035	0.231602	7.03947	1.92972e-12	1.20369e-10
TraesCS3D02G219900	556.369	-0.261396	0.0371362	-7.03884	1.93847e-12	1.20793e-10
TraesCS5B02G559100	1122.21	-0.216082	0.0307017	-7.0381	1.94878e-12	1.21312e-10
TraesCS2A02G116100	208.089	0.954408	0.135704	7.03304	2.02085e-12	1.25672e-10
TraesCS2A02G045000	128.265	0.503149	0.0715689	7.03027	2.06127e-12	1.28057e-10
TraesCS6D02G360400	479.31	0.280505	0.039901	7.03003	2.06491e-12	1.28154e-10
TraesCS4A02G387000	538.115	-0.256713	0.036527	-7.02804	2.09458e-12	1.29864e-10
TraesCS7D02G140400	440.338	-0.347295	0.0494255	-7.02663	2.1158e-12	1.31048e-10
TraesCS2A02G425900	3682.25	0.281475	0.0400601	7.02633	2.12031e-12	1.31195e-10
TraesCS3A02G459600	1826.63	0.283029	0.0402845	7.02575	2.12914e-12	1.31609e-10
TraesCS2D02G311500	833.438	0.418022	0.0595119	7.02417	2.1535e-12	1.32982e-10
TraesCS4D02G199700	359.832	0.324947	0.0462737	7.02227	2.1829e-12	1.34662e-10
TraesCS6B02G081600	2642.4	-0.56547	0.0805286	-7.02197	2.18754e-12	1.34814e-10
TraesCS3D02G253300	4875.26	-0.289499	0.041236	-7.02054	2.21013e-12	1.3607e-10
TraesCS2B02G491600	128.71	0.515739	0.073496	7.01723	2.26303e-12	1.39188e-10
TraesCS3D02G161300	2709.66	-0.242032	0.0345015	-7.01511	2.29767e-12	1.41037e-10
TraesCS4A02G288600	476.208	-0.278297	0.0396711	-7.01511	2.29763e-12	1.41037e-10
TraesCS7A02G352700	1383.18	-0.247874	0.0353373	-7.0145	2.3078e-12	1.41517e-10
TraesCS6D02G166700	2190.77	-0.204963	0.0292237	-7.01359	2.32285e-12	1.42299e-10
TraesCS7B02G158500	526.474	-0.355112	0.0506378	-7.01277	2.3364e-12	1.42987e-10
TraesCS1B02G352400	17.1688	1.82304	0.259971	7.01248	2.34136e-12	1.43006e-10
TraesCS6A02G257900	455.811	-0.256492	0.0365761	-7.01255	2.34007e-12	1.43006e-10
TraesCS2B02G069400	7.31098	2.15537	0.307414	7.0113	2.36111e-12	1.4407e-10
TraesCS1D02G107300	923.21	-0.318627	0.0454481	-7.01078	2.36997e-12	1.44467e-10
TraesCS1A02G179000	4240.18	-0.333612	0.0475881	-7.01041	2.37617e-12	1.44702e-10
TraesCS2A02G278400	283.056	-0.392418	0.0559796	-7.01001	2.383e-12	1.44975e-10
TraesCS3D02G151300	2104.74	0.283241	0.0404094	7.00928	2.39548e-12	1.4559e-10
TraesCS2D02G296800	1245.93	-0.348956	0.049806	-7.00632	2.44671e-12	1.48557e-10
TraesCS7B02G420000	201.977	0.488011	0.0696613	7.00548	2.46139e-12	1.49302e-10
TraesCS3D02G325100	987.568	-0.373683	0.0533438	-7.00518	2.46668e-12	1.49476e-10
TraesCS6B02G264100	266.242	0.405124	0.057844	7.00373	2.49232e-12	1.50881e-10
TraesCS2A02G198600	130.429	0.440547	0.0629033	7.00356	2.49533e-12	1.50915e-10
TraesCS6D02G178200	5009.73	-0.225627	0.0322195	-7.00281	2.50878e-12	1.51579e-10
TraesCS7B02G129100	374.61	-0.418751	0.0598155	-7.00072	2.54655e-12	1.53711e-10
TraesCS4D02G163700	514.52	-0.5678	0.081109	-7.00046	2.5512e-12	1.53841e-10
TraesCS1D02G118300	112.851	0.696022	0.0994642	6.99771	2.60177e-12	1.56737e-10
TraesCS1D02G122100	941.939	-0.273596	0.0391023	-6.99691	2.61667e-12	1.57481e-10
TraesCS7B02G063400	6713.91	0.673627	0.0962855	6.99613	2.63121e-12	1.58201e-10
TraesCS5A02G429000	2480.97	-0.229772	0.0328443	-6.99581	2.63728e-12	1.58412e-10
TraesCS3A02G278500	606.807	-0.244431	0.0349479	-6.99414	2.66893e-12	1.60157e-10
TraesCS2B02G308200	752.864	0.502781	0.0719106	6.99175	2.71483e-12	1.62752e-10
TraesCS3D02G432600	2833.02	-0.232951	0.0333196	-6.99141	2.72146e-12	1.62991e-10
TraesCS4A02G401000	222.787	-0.405533	0.0580106	-6.99068	2.73555e-12	1.63676e-10
TraesCS1A02G191400	617.437	-0.277425	0.0396868	-6.99037	2.74164e-12	1.63881e-10
TraesCS7D02G472100	137.421	1.65741	0.237165	6.98842	2.77992e-12	1.66009e-10
TraesCS4D02G233600	678.696	-0.235358	0.0336797	-6.98812	2.78601e-12	1.66211e-10
TraesCS1D02G156100	159.29	-0.392112	0.0561279	-6.98604	2.82746e-12	1.68521e-10
TraesCS4A02G066100	9.37255	2.66017	0.380808	6.9856	2.83636e-12	1.68888e-10
TraesCS2B02G350800	615.86	-0.337853	0.0483739	-6.98421	2.86459e-12	1.70404e-10
TraesCS1A02G265000	767.792	-0.271555	0.0388873	-6.98313	2.88676e-12	1.71557e-10
TraesCS2A02G397600	120.472	-0.585458	0.0838444	-6.98268	2.89611e-12	1.71947e-10
TraesCS4A02G021000	26.148	1.02106	0.146265	6.98092	2.93251e-12	1.73941e-10
TraesCS6B02G139000	1496.4	-0.301854	0.043245	-6.98009	2.94998e-12	1.74809e-10
TraesCS1D02G012600	469.626	-0.613783	0.0879357	-6.97991	2.95378e-12	1.74866e-10
TraesCS6D02G063300	6784.16	-0.534525	0.0765898	-6.97906	2.97156e-12	1.7575e-10
TraesCS2B02G366700	185.625	-0.467797	0.0670365	-6.97824	2.98896e-12	1.76609e-10
TraesCS1D02G044000	379.318	0.334188	0.0478924	6.97789	2.99647e-12	1.76884e-10
TraesCS6B02G204200	200.923	-0.449596	0.0644384	-6.97714	3.01249e-12	1.77642e-10
TraesCS7D02G241300	293.971	0.373822	0.0535791	6.97702	3.01509e-12	1.77642e-10
TraesCS3B02G327400	989.027	0.320025	0.0458869	6.97421	3.07592e-12	1.81053e-10
TraesCS2D02G179400	2176.39	-0.303172	0.043489	-6.97124	3.14164e-12	1.84745e-10
TraesCS4D02G147800	700.391	-0.238051	0.0341487	-6.97103	3.14634e-12	1.84845e-10
TraesCS2B02G525800	752.326	-0.404078	0.0579784	-6.96946	3.1817e-12	1.86745e-10
TraesCS4A02G008300	3109.61	-0.214927	0.030841	-6.96886	3.1951e-12	1.87353e-10
TraesCS7D02G466000	236.291	-0.38632	0.0554425	-6.96794	3.21614e-12	1.88407e-10
TraesCS7B02G437100	1488.57	0.278174	0.0399377	6.96519	3.27953e-12	1.91938e-10
TraesCS5B02G132700	705.96	-0.296943	0.0426376	-6.96433	3.29963e-12	1.92931e-10
TraesCS7A02G504800	855.13	-0.249001	0.0357552	-6.96406	3.30607e-12	1.93125e-10
TraesCS7D02G430000	5999.87	0.658401	0.0945541	6.96322	3.32572e-12	1.94089e-10
TraesCS4A02G358800	621.911	-0.319086	0.0458323	-6.96205	3.35363e-12	1.95532e-10
TraesCS5B02G368600	1257.74	0.23991	0.0344767	6.95861	3.43648e-12	2.00173e-10
TraesCS7D02G088200	51.9339	1.46122	0.210037	6.95695	3.47709e-12	2.02157e-10
TraesCSU02G138500	242.694	0.466991	0.0671257	6.95697	3.47681e-12	2.02157e-10
TraesCS5A02G009800	1709.99	0.475361	0.0683427	6.95556	3.5117e-12	2.03976e-10
TraesCS3A02G439800	1714.87	-0.386736	0.0556048	-6.95508	3.52352e-12	2.0447e-10
TraesCS7B02G201700	836.301	-0.386223	0.0555742	-6.94968	3.66117e-12	2.12258e-10
TraesCS2A02G369800	361.416	-0.509679	0.0733649	-6.94718	3.72662e-12	2.1585e-10
TraesCS7A02G300700	420.139	-0.428619	0.061699	-6.94694	3.73305e-12	2.16019e-10
TraesCS4A02G163400	939.874	-0.348998	0.0502401	-6.9466	3.74198e-12	2.16333e-10
TraesCS5A02G115200	1014.28	0.371193	0.0534397	6.94602	3.75749e-12	2.17026e-10
TraesCS5D02G261600	165.792	0.378696	0.0545378	6.94374	3.81864e-12	2.20351e-10
TraesCS3B02G370300	854.655	1.05051	0.151358	6.94055	3.90588e-12	2.25175e-10
TraesCS2D02G313300	208.277	-0.511491	0.0737183	-6.93845	3.96415e-12	2.28237e-10
TraesCS6B02G176900	137.056	0.552477	0.0796263	6.93837	3.96642e-12	2.28237e-10
TraesCS3B02G074000	22.6341	0.950541	0.137008	6.93784	3.9814e-12	2.28886e-10
TraesCS1D02G336300	878.231	-0.298837	0.0430782	-6.93709	4.00269e-12	2.29508e-10
TraesCS3D02G404000	595.831	0.396599	0.0571704	6.93714	4.00112e-12	2.29508e-10
TraesCS7D02G510700	356.435	-0.292906	0.0422233	-6.93706	4.00339e-12	2.29508e-10
TraesCS2D02G200600	2427.54	-0.250667	0.0361411	-6.93579	4.03955e-12	2.31366e-10
TraesCS4B02G087500	86.7251	0.679573	0.0979933	6.9349	4.06511e-12	2.32613e-10
TraesCS2D02G307500	899.337	-0.258146	0.0372287	-6.93405	4.08955e-12	2.33795e-10
TraesCS7D02G106400	1019.49	-0.224002	0.0323089	-6.93314	4.11589e-12	2.35083e-10
TraesCS2A02G423500	1177.77	-0.247087	0.0356432	-6.93223	4.14243e-12	2.36379e-10
TraesCS5A02G124300	3155.58	-0.213857	0.0308534	-6.93139	4.16714e-12	2.373e-10
TraesCS6B02G439300	700.449	0.319976	0.0461639	6.93129	4.17012e-12	2.373e-10
TraesCS7B02G203800	483.276	0.423185	0.0610527	6.93148	4.16474e-12	2.373e-10
TraesCS1B02G100800	1642.31	-0.194052	0.0279975	-6.93106	4.1769e-12	2.37467e-10
TraesCS7D02G003100	620.211	0.227589	0.0328477	6.92862	4.2496e-12	2.41377e-10
TraesCS7A02G372600	2398.13	-0.233176	0.0336649	-6.92639	4.31702e-12	2.44981e-10
TraesCS6A02G195800	993.524	-0.309215	0.0446494	-6.9254	4.34735e-12	2.46475e-10
TraesCS5D02G040500	1664.03	0.359906	0.0519723	6.92495	4.36122e-12	2.47034e-10
TraesCS3A02G429800	1315.22	-0.277213	0.0400365	-6.92402	4.39001e-12	2.48437e-10
TraesCS7D02G088500	71.3833	2.66188	0.38449	6.92313	4.41778e-12	2.49779e-10
TraesCS7A02G435300	61.2367	0.762396	0.110137	6.92226	4.44487e-12	2.5108e-10
TraesCS6D02G186900	398.668	-0.277904	0.040178	-6.91682	4.61889e-12	2.60671e-10
TraesCS7A02G012000	457.061	-0.384065	0.0555362	-6.91558	4.6594e-12	2.62717e-10
TraesCS3A02G018300	300.112	0.414386	0.0599224	6.91538	4.66604e-12	2.6285e-10
TraesCS2D02G289700	817.578	0.394989	0.0571239	6.91461	4.6915e-12	2.63803e-10
TraesCS7A02G016000	568.28	-0.318866	0.046114	-6.91473	4.68755e-12	2.63803e-10
TraesCS1D02G280700	918.226	-0.363215	0.0525327	-6.91408	4.70918e-12	2.64363e-10
TraesCS2D02G168500	191.432	0.68632	0.0992645	6.91405	4.71005e-12	2.64363e-10
TraesCS6D02G133000	16.5726	1.82277	0.263648	6.91365	4.7235e-12	2.64877e-10
TraesCS7A02G257100	4833.32	0.341682	0.0494242	6.91325	4.73676e-12	2.65379e-10
TraesCS7D02G288000	1056.04	-0.252172	0.0364811	-6.91239	4.76571e-12	2.66759e-10
TraesCS1A02G309700	13363.3	-0.261257	0.0378058	-6.9105	4.82961e-12	2.7009e-10
TraesCS5A02G009100	182.953	0.621597	0.0899576	6.90989	4.85017e-12	2.70994e-10
TraesCS5D02G420300	858.514	-0.425972	0.0616627	-6.90809	4.91218e-12	2.7421e-10
TraesCS2A02G187300	2555.54	-0.239162	0.0346337	-6.90548	5.00326e-12	2.79042e-10
TraesCS3D02G200300	725.513	-0.313546	0.0454098	-6.9048	5.02736e-12	2.80035e-10
TraesCS5A02G093300	1260.42	-0.367078	0.0531633	-6.90472	5.03016e-12	2.80035e-10
TraesCS1A02G367300	575.026	0.286356	0.0415014	6.89991	5.20372e-12	2.89175e-10
TraesCS6B02G274600	12879	0.343278	0.0497511	6.89992	5.20328e-12	2.89175e-10
TraesCS6D02G055400	9102.96	-0.316539	0.045884	-6.89868	5.24882e-12	2.91418e-10
TraesCS4B02G032700	573.758	0.443471	0.0642849	6.89852	5.25485e-12	2.9149e-10
TraesCS3B02G415500	2099.62	-0.306019	0.0443685	-6.89723	5.30277e-12	2.93884e-10
TraesCS4D02G076200	406.504	-0.367773	0.0533367	-6.8953	5.37503e-12	2.97621e-10
TraesCS3D02G416100	529.957	0.561871	0.0814956	6.8945	5.40563e-12	2.98893e-10
TraesCS7D02G459100	133.756	0.571363	0.0828729	6.89444	5.40771e-12	2.98893e-10
TraesCS7B02G121000	252.077	0.419388	0.0608388	6.89343	5.44621e-12	3.00752e-10
TraesCS1B02G341000	251.815	0.455952	0.0662205	6.88536	5.76406e-12	3.17964e-10
TraesCS7A02G177900	1460.05	-0.318665	0.0462822	-6.88526	5.76821e-12	3.17964e-10
TraesCS3A02G399000	485.456	0.367045	0.0533179	6.88408	5.81602e-12	3.20313e-10
TraesCS1D02G084600	2201.46	-0.238088	0.0346055	-6.88006	5.98255e-12	3.2919e-10
TraesCS2B02G330100	1053.89	0.47188	0.0685893	6.87979	5.99404e-12	3.29528e-10
TraesCS7D02G440100	166.017	0.46887	0.068161	6.87885	6.03368e-12	3.31411e-10
TraesCS3D02G037000	287.752	-0.525687	0.0764472	-6.87647	6.13531e-12	3.36694e-10
TraesCS3D02G326300	348.601	-0.378505	0.0550535	-6.87523	6.18902e-12	3.39339e-10
TraesCS7D02G040100	45.4392	0.820856	0.119412	6.87417	6.23512e-12	3.41563e-10
TraesCS5A02G054800	558.854	-0.333059	0.0484554	-6.87353	6.26319e-12	3.42796e-10
TraesCS2A02G125700	671.42	0.358428	0.0521518	6.8728	6.2956e-12	3.44264e-10
TraesCS5A02G086400	242.282	0.368039	0.0535567	6.87194	6.33358e-12	3.46034e-10
TraesCS4D02G250100	1939.67	-0.286661	0.0417162	-6.87168	6.34497e-12	3.46349e-10
TraesCS1D02G216000	421.235	0.301	0.0438105	6.87049	6.39795e-12	3.48623e-10
TraesCS6A02G003800	58.6416	0.686997	0.0999911	6.87059	6.39391e-12	3.48623e-10
TraesCS5A02G204200	1228.05	-0.245447	0.0357328	-6.86897	6.46689e-12	3.52068e-10
TraesCS7D02G348300	1747.61	-0.333283	0.0485376	-6.86649	6.57991e-12	3.57905e-10
TraesCS4A02G050200	1284.77	0.257173	0.0374557	6.86606	6.60015e-12	3.5869e-10
TraesCS4B02G030400	556.275	-0.367063	0.0534868	-6.86269	6.75774e-12	3.6693e-10
TraesCS5D02G126800	632.787	-0.304161	0.0443394	-6.85983	6.89416e-12	3.74008e-10
TraesCS6B02G209900	1245.68	-0.250222	0.0364775	-6.85963	6.90399e-12	3.74212e-10
TraesCS3D02G446600	413.334	0.287102	0.0418604	6.85854	6.95671e-12	3.76739e-10
TraesCS2B02G051000	2675.01	-0.32336	0.0471489	-6.85827	6.97007e-12	3.7713e-10
TraesCS3A02G335000	1263.67	-0.321199	0.0468499	-6.85592	7.08556e-12	3.83043e-10
TraesCS3A02G383700	315.392	0.461023	0.0672471	6.85565	7.09887e-12	3.83426e-10
TraesCS5D02G550700	2980.49	0.301504	0.043987	6.85438	7.16242e-12	3.8652e-10
TraesCS2D02G176000	1373.73	-0.310426	0.045292	-6.85389	7.18684e-12	3.87498e-10
TraesCS5A02G442500	6551.01	-0.190265	0.0277679	-6.85195	7.28483e-12	3.92438e-10
TraesCS4A02G320000	1686.99	-0.18809	0.0274566	-6.85043	7.36268e-12	3.96286e-10
TraesCS4D02G243000	21.5034	1.57104	0.229344	6.85014	7.3777e-12	3.96747e-10
TraesCS3A02G151200	2172.76	-0.28166	0.0411212	-6.84951	7.41023e-12	3.9815e-10
TraesCS3B02G205500	38.0137	-1.06302	0.155237	-6.8477	7.50457e-12	4.02517e-10
TraesCS3D02G402900	512.373	0.577358	0.0843136	6.84775	7.50205e-12	4.02517e-10
TraesCS5A02G270900	862.615	-0.254783	0.0372122	-6.84677	7.55352e-12	4.0479e-10
TraesCS5B02G414900	2023.11	-0.215984	0.0315482	-6.84615	7.58659e-12	4.06209e-10
TraesCS4B02G028900	1566.64	0.431618	0.0630559	6.845	7.64769e-12	4.09083e-10
TraesCS5A02G437600	465.082	-0.368775	0.053876	-6.84489	7.65355e-12	4.09083e-10
TraesCS2D02G346400	241.332	-0.389063	0.0568519	-6.84345	7.73088e-12	4.12859e-10
TraesCS7D02G508400	170.59	0.472797	0.0690894	6.84325	7.74142e-12	4.13063e-10
TraesCS5A02G225300	229.378	0.87513	0.127885	6.84311	7.74918e-12	4.1312e-10
TraesCS5D02G064900	233.905	0.463262	0.06772	6.84084	7.87279e-12	4.19347e-10
TraesCS5B02G171400	1244.26	-0.361164	0.0527981	-6.84047	7.89361e-12	4.20093e-10
TraesCS7B02G219000	3997.9	-0.235935	0.0344918	-6.84031	7.90214e-12	4.20184e-10
TraesCS3A02G446400	394.942	0.34433	0.0503431	6.83966	7.93818e-12	4.21737e-10
TraesCS2B02G300600	128.49	0.67998	0.0994374	6.83827	8.01555e-12	4.2548e-10
TraesCS3A02G128800	125.22	0.703606	0.102902	6.83762	8.05189e-12	4.27041e-10
TraesCS3A02G411500	40.0197	0.777048	0.113677	6.83556	8.16871e-12	4.32865e-10
TraesCS5B02G061700	519.364	-0.267256	0.0391048	-6.83436	8.2371e-12	4.36114e-10
TraesCS4A02G113300	1050.02	0.215809	0.0315915	6.83124	8.41832e-12	4.45325e-10
TraesCSU02G068100	3506.7	-0.227039	0.0332431	-6.82965	8.51196e-12	4.49893e-10
TraesCS2B02G203200	571.737	0.299875	0.0439417	6.82439	8.83001e-12	4.66303e-10
TraesCS5A02G226200	222.177	0.384529	0.056354	6.82346	8.88719e-12	4.68921e-10
TraesCS6B02G159000	69.7967	0.967393	0.141813	6.82161	9.00265e-12	4.74607e-10
TraesCS7A02G266000	2352.09	0.374475	0.0549052	6.82039	9.07922e-12	4.78234e-10
TraesCS5A02G455400	333.143	-0.376371	0.0551868	-6.81995	9.10744e-12	4.79311e-10
TraesCS3D02G466100	296.239	0.349727	0.0512853	6.81924	9.15255e-12	4.81274e-10
TraesCS3B02G333200	425.026	-0.407868	0.0598177	-6.81852	9.19825e-12	4.83265e-10
TraesCS3B02G366100	84.5087	0.669773	0.098242	6.81758	9.25841e-12	4.86011e-10
TraesCS6B02G363500	665.546	0.425637	0.0624378	6.81698	9.29772e-12	4.8766e-10
TraesCS3D02G441200	303.225	-0.307462	0.0451071	-6.81626	9.34386e-12	4.89663e-10
TraesCS2A02G292900	390.916	-0.352242	0.0516783	-6.81606	9.35719e-12	4.89945e-10
TraesCS4D02G118500	40.5528	1.08652	0.159451	6.81411	9.48493e-12	4.96211e-10
TraesCS5D02G323100	195.807	-0.624175	0.0916242	-6.81234	9.60256e-12	5.01939e-10
TraesCS4D02G046700	605.269	-0.26476	0.0388744	-6.81065	9.71593e-12	5.07435e-10
TraesCS1A02G142500	373.008	-0.353739	0.0519476	-6.80953	9.7916e-12	5.10954e-10
TraesCS1D02G104200	1845.88	-0.24547	0.0360494	-6.80926	9.81002e-12	5.11482e-10
TraesCS4A02G332600	189.467	0.431697	0.0634091	6.80813	9.88756e-12	5.15089e-10
TraesCS2A02G365200	203.107	0.496921	0.0730126	6.80596	1.00377e-11	5.22471e-10
TraesCS6D02G181000	710.45	-0.23849	0.0350498	-6.80432	1.01529e-11	5.2802e-10
TraesCS4B02G210800	1048.77	0.375576	0.0552269	6.80061	1.04177e-11	5.41336e-10
TraesCS5D02G439600	48.5549	-0.723074	0.106333	-6.8001	1.04547e-11	5.42798e-10
TraesCS5D02G392300	861.716	-0.409108	0.0601832	-6.79771	1.06293e-11	5.51398e-10
TraesCS2D02G417900	1009.46	-0.335489	0.0493852	-6.79331	1.0959e-11	5.67069e-10
TraesCS4A02G167400	3145.26	-0.385875	0.0568014	-6.7934	1.09522e-11	5.67069e-10
TraesCS5A02G547800	182.755	0.460462	0.067781	6.79339	1.09532e-11	5.67069e-10
TraesCS2D02G328900	1434.57	-0.441169	0.0649696	-6.7904	1.11826e-11	5.78158e-10
TraesCS6A02G032600	1655.56	-0.25793	0.037992	-6.78907	1.12855e-11	5.82988e-10
TraesCS3D02G288700	262.893	0.558997	0.0823396	6.78891	1.1298e-11	5.83144e-10
TraesCS7D02G013800	33.6724	0.984169	0.144971	6.78872	1.13131e-11	5.83435e-10
TraesCS7B02G498600	303.38	0.376434	0.0554732	6.78588	1.15383e-11	5.94553e-10
TraesCS7A02G386400	118.352	0.45617	0.0672347	6.78473	1.163e-11	5.98777e-10
TraesCS1A02G208500	784.82	-0.225845	0.0332897	-6.78424	1.16702e-11	6.00343e-10
TraesCS7B02G202200	1025.9	0.37507	0.055293	6.7833	1.17458e-11	6.03728e-10
TraesCS3A02G153900	2854.69	-0.203462	0.0299991	-6.78227	1.18306e-11	6.07074e-10
TraesCS5B02G013100	128.897	-0.491436	0.0724579	-6.78237	1.1822e-11	6.07074e-10
TraesCS1A02G373300	235.942	-0.38131	0.0562622	-6.77738	1.22377e-11	6.27441e-10
TraesCS4D02G046400	18906.5	-0.196839	0.0290453	-6.77698	1.22715e-11	6.28651e-10
TraesCS3A02G305400	2294.85	0.445928	0.0658218	6.77478	1.24593e-11	6.37743e-10
TraesCS2D02G260500	1592.7	-0.167021	0.0246596	-6.77308	1.26065e-11	6.44741e-10
TraesCS2B02G572800	469	0.308825	0.0456027	6.77209	1.26937e-11	6.48662e-10
TraesCS3A02G042100	2313.57	0.364584	0.0538437	6.77116	1.27757e-11	6.5231e-10
TraesCS1B02G420600	517.99	-0.365262	0.053956	-6.76962	1.29118e-11	6.57625e-10
TraesCS1D02G098500	886.167	-0.368052	0.0543677	-6.76968	1.29066e-11	6.57625e-10
TraesCS5B02G361000	276.003	0.632519	0.0934319	6.76984	1.28922e-11	6.57625e-10
TraesCS7B02G008100	3485.08	-0.213783	0.0315827	-6.769	1.2968e-11	6.59944e-10
TraesCS7B02G364400	680.168	0.403259	0.0595807	6.76828	1.30324e-11	6.62676e-10
TraesCS2A02G083000	18808.6	-0.190901	0.0282074	-6.76775	1.30805e-11	6.6457e-10
TraesCS5D02G206300	832.344	0.326571	0.0482902	6.76268	1.35459e-11	6.8765e-10
TraesCS6B02G054600	655.667	0.509517	0.0753533	6.76171	1.36374e-11	6.91724e-10
TraesCS6A02G334300	1357.38	-0.198891	0.0294262	-6.75898	1.38971e-11	7.04316e-10
TraesCS6D02G336200	745.556	0.304133	0.0450144	6.75635	1.41508e-11	7.16588e-10
TraesCS2D02G544200	490.729	0.303246	0.0448998	6.75383	1.43993e-11	7.28572e-10
TraesCS6D02G350100	447.57	0.320226	0.0474172	6.75338	1.44444e-11	7.30254e-10
TraesCS5D02G088100	29.4723	1.02238	0.151417	6.75207	1.45748e-11	7.36243e-10
TraesCS1A02G155200	6261.15	-0.278743	0.0412865	-6.75142	1.46403e-11	7.38944e-10
TraesCS5B02G099700	121.268	1.15231	0.170685	6.75111	1.46721e-11	7.39942e-10
TraesCS3B02G080300	342.517	0.464767	0.0689146	6.7441	1.53979e-11	7.75913e-10
TraesCS4A02G093600	1399.39	0.343676	0.0509816	6.74117	1.57121e-11	7.91101e-10
TraesCS3A02G068300	31.5952	0.900405	0.133578	6.74066	1.57673e-11	7.93228e-10
TraesCS1B02G447500	556.199	0.346475	0.0514051	6.74008	1.583e-11	7.95736e-10
TraesCS2D02G306600	466.357	-0.290105	0.043043	-6.73987	1.58524e-11	7.96211e-10
TraesCS2D02G277000	4932.83	0.214456	0.0318229	6.73906	1.5942e-11	8.00059e-10
TraesCS3D02G264300	124.116	0.594821	0.0882719	6.73851	1.60024e-11	8.02437e-10
TraesCS4D02G175900	32029.1	0.486687	0.0722312	6.73791	1.60678e-11	8.05064e-10
TraesCS6A02G383800	2276.27	-0.200965	0.0298327	-6.73641	1.62352e-11	8.1279e-10
TraesCS3B02G365400	2445.79	0.338736	0.0502975	6.73465	1.64322e-11	8.21986e-10
TraesCS2D02G408300	239.446	-0.363287	0.0539589	-6.73266	1.66585e-11	8.32626e-10
TraesCS1B02G160300	376.898	-0.358625	0.0532819	-6.73071	1.68838e-11	8.43204e-10
TraesCS5A02G093900	816.919	-0.326234	0.048472	-6.73036	1.69245e-11	8.44554e-10
TraesCS6A02G016100	185.744	0.42468	0.063134	6.72664	1.73621e-11	8.6569e-10
TraesCS7D02G012600	565.488	-0.345198	0.0513197	-6.72642	1.73889e-11	8.66324e-10
TraesCS7D02G364400	5600.19	-0.234801	0.0349215	-6.72367	1.77199e-11	8.82103e-10
TraesCS6B02G051200	220.066	0.526658	0.0783399	6.72273	1.78355e-11	8.87139e-10
TraesCS6B02G183900	265.796	-0.33439	0.0497485	-6.7216	1.79734e-11	8.93277e-10
TraesCS2B02G129400	362.097	-0.377981	0.0562452	-6.72024	1.81429e-11	9.00974e-10
TraesCS1B02G477100	248.36	0.545524	0.0811855	6.71947	1.82384e-11	9.04988e-10
TraesCS1D02G135300	653.324	-0.257447	0.0383246	-6.71753	1.84829e-11	9.16383e-10
TraesCS2B02G063900	1171.35	0.242478	0.036105	6.71591	1.869e-11	9.25906e-10
TraesCS1D02G375700	4941.69	-0.83923	0.124966	-6.71566	1.87214e-11	9.26719e-10
TraesCS4A02G329600	2318.44	-0.212486	0.0316426	-6.71521	1.87798e-11	9.28862e-10
TraesCS7D02G015500	1254.45	-0.252058	0.037546	-6.71332	1.90251e-11	9.40238e-10
TraesCS7B02G234100	933.196	-0.241693	0.036011	-6.71164	1.92449e-11	9.50339e-10
TraesCS2A02G430100	5036.13	-0.188966	0.0281557	-6.71145	1.92704e-11	9.50839e-10
TraesCS4A02G361900	729	0.297685	0.0443667	6.70965	1.95087e-11	9.61825e-10
TraesCS5D02G380900	666.742	-0.487335	0.0726789	-6.70532	2.00969e-11	9.90035e-10
TraesCS1D02G221300	230.189	-0.367612	0.0548257	-6.7051	2.01265e-11	9.90699e-10
TraesCS6B02G361800	6134.93	-0.202139	0.0301608	-6.70203	2.0554e-11	1.01094e-09
TraesCS2D02G355000	575.287	-0.211612	0.0315769	-6.70146	2.06344e-11	1.01408e-09
TraesCS5B02G532000	2104.73	-0.214391	0.0319989	-6.69994	2.08503e-11	1.02387e-09
TraesCS7D02G244500	405.876	0.537068	0.0801688	6.69921	2.09545e-11	1.02817e-09
TraesCS7A02G284700	2056.56	-0.207744	0.0310118	-6.69886	2.10046e-11	1.02981e-09
TraesCS1A02G045700	6827.73	0.409461	0.0611506	6.69595	2.14281e-11	1.04974e-09
TraesCS2A02G117100	151.491	0.616263	0.0920588	6.69423	2.16818e-11	1.06132e-09
TraesCS5A02G481400	415.487	0.492141	0.0735644	6.68993	2.2327e-11	1.09204e-09
TraesCS4B02G207800	1482.49	-0.242928	0.0363243	-6.68774	2.26644e-11	1.10766e-09
TraesCS1A02G366400	659.184	-0.325588	0.0486864	-6.68745	2.27091e-11	1.10897e-09
TraesCS7B02G037300	554.482	0.505633	0.0756122	6.68719	2.27501e-11	1.11009e-09
TraesCS1A02G108000	84.4589	0.868103	0.129822	6.68687	2.28e-11	1.11165e-09
TraesCS4A02G392400	30.9035	2.3153	0.346325	6.68533	2.30399e-11	1.12245e-09
TraesCS4D02G242000	823.72	-0.26913	0.0402632	-6.68427	2.32076e-11	1.12973e-09
TraesCS3A02G069800	114.735	0.530095	0.0793078	6.68402	2.32468e-11	1.13075e-09
TraesCS4B02G153900	717.54	-0.261193	0.0390817	-6.68326	2.33689e-11	1.13579e-09
TraesCS5D02G514800	2036.77	0.208331	0.0311759	6.68244	2.34996e-11	1.14124e-09
TraesCS2A02G430500	226.844	-0.720777	0.107896	-6.68029	2.38467e-11	1.15719e-09
TraesCS7A02G345700	1107.66	-0.214234	0.0320701	-6.68017	2.38658e-11	1.1572e-09
TraesCS1B02G129300	789.679	-0.333231	0.0498864	-6.6798	2.39265e-11	1.15923e-09
TraesCS4D02G057300	1000.32	0.21505	0.0321952	6.67957	2.39642e-11	1.16015e-09
TraesCS1A02G242600	838.049	-0.264511	0.039607	-6.67839	2.41586e-11	1.16772e-09
TraesCS2A02G009400	652.265	0.262995	0.0393795	6.67847	2.41442e-11	1.16772e-09
TraesCS3B02G131200	6.59234	3.12257	0.467838	6.67446	2.48144e-11	1.19848e-09
TraesCS3D02G207000	748.928	-0.382343	0.0572939	-6.67336	2.50009e-11	1.20654e-09
TraesCS7D02G230400	154.046	0.503075	0.0753934	6.67267	2.51188e-11	1.21128e-09
TraesCS5D02G160700	401.496	0.28133	0.0421684	6.67158	2.53073e-11	1.21942e-09
TraesCS1D02G145900	2619.27	-0.2069	0.031018	-6.67033	2.55235e-11	1.22888e-09
TraesCS2A02G118700	508.479	-0.263164	0.0394546	-6.67004	2.55736e-11	1.23033e-09
TraesCS2D02G275100	18762.5	-0.287881	0.0431794	-6.6671	2.60903e-11	1.25421e-09
TraesCS6B02G449900	989.161	0.477203	0.0715933	6.66547	2.63815e-11	1.26722e-09
TraesCS4B02G274500	4930.55	0.273756	0.0410794	6.66407	2.66341e-11	1.27835e-09
TraesCS1B02G368600	26.3299	1.00365	0.150613	6.66376	2.66901e-11	1.28005e-09
TraesCS2D02G323700	67.7742	-0.600508	0.0901283	-6.66281	2.68632e-11	1.28735e-09
TraesCS2B02G324200	71.5615	-0.696065	0.104524	-6.65939	2.74966e-11	1.31668e-09
TraesCS2B02G507200	398.095	0.600924	0.0902456	6.65877	2.76135e-11	1.32125e-09
TraesCS3D02G276900	169.894	-0.577958	0.0868112	-6.65765	2.78246e-11	1.33031e-09
TraesCS3B02G130900	5.13244	3.98383	0.598521	6.65611	2.81161e-11	1.34321e-09
TraesCS1B02G260100	1063.38	0.308929	0.0464294	6.65374	2.85736e-11	1.36401e-09
TraesCS7D02G317600	285.22	0.318241	0.0478497	6.65085	2.91402e-11	1.38998e-09
TraesCS3D02G194500	2031.92	-0.314556	0.0473202	-6.6474	2.98323e-11	1.42189e-09
TraesCS5D02G328400	504.227	0.375739	0.0565326	6.64641	3.00332e-11	1.43036e-09
TraesCS7D02G106500	239.656	0.36634	0.0551198	6.64626	3.00642e-11	1.43073e-09
TraesCS3A02G082000	97.7489	0.48449	0.0729096	6.64508	3.03044e-11	1.44105e-09
TraesCS7D02G050000	1219.3	-0.249928	0.0376148	-6.64439	3.04465e-11	1.44669e-09
TraesCS7A02G553200	456.875	-0.369242	0.0555932	-6.64186	3.09748e-11	1.47066e-09
TraesCS4D02G152900	495.137	-0.286398	0.043125	-6.6411	3.11354e-11	1.47715e-09
TraesCS1B02G173600	534.435	-0.363841	0.0547913	-6.6405	3.12618e-11	1.482e-09
TraesCS5D02G374000	707.807	-0.318954	0.0480542	-6.63738	3.19303e-11	1.51253e-09
TraesCS6A02G263800	1621.03	-0.260556	0.0392597	-6.63672	3.20743e-11	1.51818e-09
TraesCS6B02G219800	477.21	0.315748	0.0475866	6.63522	3.24017e-11	1.5325e-09
TraesCS5B02G446600	2087.45	-0.204639	0.0308448	-6.6345	3.25611e-11	1.53886e-09
TraesCS1A02G036800	126.749	0.654378	0.0986636	6.63242	3.30231e-11	1.5595e-09
TraesCS1D02G129300	366.289	0.545098	0.0822448	6.62776	3.40827e-11	1.60831e-09
TraesCS2A02G382000	2604.81	0.259435	0.0391472	6.62717	3.42186e-11	1.61349e-09
TraesCS1D02G225600	5728.22	-0.243963	0.0368182	-6.62614	3.44588e-11	1.62357e-09
TraesCS7A02G336100	224.937	0.579681	0.0875132	6.62393	3.49768e-11	1.64671e-09
TraesCS3B02G115400	255.664	0.388389	0.058641	6.62316	3.51592e-11	1.65404e-09
TraesCS6B02G444700	1020.82	-0.235239	0.0355198	-6.62277	3.5253e-11	1.65592e-09
TraesCS7D02G200900	1292.01	-0.23264	0.0351267	-6.62287	3.52284e-11	1.65592e-09
TraesCS3D02G055000	257.623	0.788137	0.119032	6.62125	3.5618e-11	1.67179e-09
TraesCS5D02G159100	514.856	-0.93449	0.14116	-6.62008	3.58999e-11	1.68374e-09
TraesCS3A02G201100	699.486	-0.434467	0.0656302	-6.61992	3.59396e-11	1.68432e-09
TraesCS1D02G146100	3684.51	-0.407143	0.0615276	-6.61725	3.65944e-11	1.71371e-09
TraesCS5A02G391800	515.735	-0.513843	0.0776626	-6.61634	3.68191e-11	1.72292e-09
TraesCS6D02G196700	295.17	-0.456457	0.0689911	-6.61617	3.68615e-11	1.7236e-09
TraesCS7A02G478600	228.155	-0.426447	0.0644695	-6.6147	3.72295e-11	1.73948e-09
TraesCS4A02G260800	1666.27	-0.232856	0.0352051	-6.61426	3.7341e-11	1.74337e-09
TraesCS6A02G365700	32.9501	2.0513	0.310141	6.61409	3.73853e-11	1.74412e-09
TraesCS1D02G357000	136.435	0.492068	0.0744062	6.61327	3.75915e-11	1.75162e-09
TraesCS5D02G449900	4694.98	-0.221061	0.0334271	-6.61323	3.76029e-11	1.75162e-09
TraesCS2A02G205900	14.9331	2.71476	0.410741	6.60942	3.85825e-11	1.79454e-09
TraesCS7A02G479900	1195.47	0.338868	0.0512699	6.60949	3.85644e-11	1.79454e-09
TraesCS5D02G554100	1137.25	-0.340156	0.0514849	-6.60691	3.92433e-11	1.8239e-09
TraesCS2B02G198500	540.328	-0.297055	0.044966	-6.60622	3.94247e-11	1.83095e-09
TraesCS3D02G259700	155.431	0.37624	0.0569595	6.6054	3.96454e-11	1.83981e-09
TraesCS7D02G248300	150.727	0.547505	0.0829003	6.60438	3.9919e-11	1.85111e-09
TraesCS2B02G281500	1000.5	-0.232179	0.0351566	-6.60414	3.99835e-11	1.85271e-09
TraesCS1A02G442600	1942.09	-0.175429	0.026566	-6.60352	4.01498e-11	1.85902e-09
TraesCS6A02G314700	335.33	0.368716	0.0558687	6.59968	4.12035e-11	1.90637e-09
TraesCS1B02G254700	1006.11	-0.293086	0.0444104	-6.5995	4.12548e-11	1.90731e-09
TraesCS4B02G170700	630.578	0.327822	0.0496819	6.59841	4.15589e-11	1.91993e-09
TraesCS3B02G395100	446.358	0.280565	0.0425297	6.59693	4.19771e-11	1.93738e-09
TraesCS3D02G352800	2968.89	-0.298797	0.0452939	-6.59685	4.19994e-11	1.93738e-09
TraesCS5B02G470700	1503.89	0.257002	0.0389592	6.5967	4.20423e-11	1.93791e-09
TraesCS2D02G211700	218.431	-0.521804	0.079113	-6.59569	4.23295e-11	1.94969e-09
TraesCS7D02G314300	2786.74	-0.234861	0.0356511	-6.58777	4.4648e-11	2.05494e-09
TraesCS5D02G456200	297.484	0.4272	0.0648497	6.58754	4.47179e-11	2.05662e-09
TraesCS2B02G512900	82.048	0.585162	0.0888447	6.58635	4.50769e-11	2.07159e-09
TraesCS3B02G319500	699.368	-0.265937	0.04039	-6.58424	4.57227e-11	2.0997e-09
TraesCS2A02G364500	252.585	-0.434531	0.0660073	-6.58307	4.60828e-11	2.11466e-09
TraesCS1A02G121000	2441.48	-0.268738	0.0408312	-6.58167	4.65188e-11	2.13149e-09
TraesCS1D02G035300	2214.27	0.386617	0.0587408	6.58174	4.64973e-11	2.13149e-09
TraesCS6D02G046600	5101.6	-0.446974	0.0679293	-6.57998	4.70499e-11	2.15423e-09
TraesCS4A02G166500	1979.75	-0.262786	0.039938	-6.57985	4.70911e-11	2.15452e-09
TraesCS5B02G274500	857.701	-0.265681	0.0403806	-6.57944	4.72236e-11	2.15897e-09
TraesCS7B02G131400	287.223	-0.662133	0.100673	-6.57709	4.79744e-11	2.19167e-09
TraesCS2B02G377300	694.494	-0.335531	0.0510182	-6.57669	4.81037e-11	2.19595e-09
TraesCS7A02G298300	993.223	-0.270974	0.0412288	-6.57245	4.94937e-11	2.25773e-09
TraesCS1A02G176300	1032.34	-0.418879	0.0637435	-6.57132	4.98714e-11	2.27328e-09
TraesCS5D02G025100	203.411	0.392225	0.0597002	6.56991	5.03451e-11	2.29318e-09
TraesCS4A02G311300	1078.58	-0.359879	0.0548009	-6.56702	5.13315e-11	2.33638e-09
TraesCS5B02G124400	560.893	-0.233959	0.0356406	-6.56439	5.22455e-11	2.37623e-09
TraesCS4A02G260200	2030.33	-0.440794	0.0671781	-6.56158	5.32413e-11	2.41973e-09
TraesCS1A02G194000	2071.9	-0.266012	0.0405435	-6.56116	5.33916e-11	2.42311e-09
TraesCS2A02G373600	1254.55	-0.727117	0.110822	-6.56115	5.33942e-11	2.42311e-09
TraesCS7D02G499100	194.527	0.629408	0.0959333	6.56089	5.34872e-11	2.42554e-09
TraesCS6A02G213000	125	0.613522	0.0935268	6.55985	5.38608e-11	2.44069e-09
TraesCS4A02G121000	1050.62	-0.304996	0.0465179	-6.55652	5.50773e-11	2.49398e-09
TraesCS1D02G162200	313.969	0.531011	0.0809929	6.55627	5.51718e-11	2.49642e-09
TraesCS5D02G170600	989.079	-0.384349	0.0586294	-6.55556	5.54334e-11	2.50642e-09
TraesCS3B02G280600	981.382	-0.26254	0.0400546	-6.55455	5.58116e-11	2.52167e-09
TraesCS4A02G043600	1179.55	-0.402106	0.0613511	-6.55418	5.59498e-11	2.52606e-09
TraesCS1D02G230900	490.376	1.63659	0.249778	6.55217	5.67077e-11	2.55841e-09
TraesCS7A02G040700	4912.01	-0.277166	0.0423037	-6.55182	5.68388e-11	2.56244e-09
TraesCS7A02G509200	191.91	0.458488	0.0699912	6.55064	5.72905e-11	2.58092e-09
TraesCS4D02G160700	1299.74	-0.228109	0.0348405	-6.54722	5.86161e-11	2.63678e-09
TraesCS6D02G097400	681.504	0.381875	0.0583257	6.54729	5.85908e-11	2.63678e-09
TraesCS1A02G375600	344.355	0.537614	0.0821298	6.5459	5.91377e-11	2.65541e-09
TraesCS3B02G112400	168.651	0.46691	0.0713293	6.54585	5.91595e-11	2.65541e-09
TraesCS4A02G199300	788.831	0.283764	0.0433501	6.54587	5.91503e-11	2.65541e-09
TraesCS2B02G256300	410.757	-0.306165	0.0467903	-6.54334	6.01598e-11	2.69835e-09
TraesCS6B02G463100	895.025	0.337332	0.0515548	6.54318	6.02259e-11	2.69935e-09
TraesCS6D02G178300	1643.91	-0.279054	0.0426615	-6.54111	6.10632e-11	2.73489e-09
TraesCS2D02G378500	1698.32	0.258854	0.0395818	6.53972	6.16337e-11	2.75843e-09
TraesCS3A02G176300	548.922	-0.296221	0.0453026	-6.53873	6.20452e-11	2.77483e-09
TraesCS5B02G413000	1738.46	-0.220294	0.0336928	-6.53831	6.22162e-11	2.78047e-09
TraesCS2D02G139500	484.675	-0.296018	0.0452801	-6.53749	6.25606e-11	2.79383e-09
TraesCS6B02G040000	832.034	0.383296	0.0586316	6.53737	6.26113e-11	2.79407e-09
TraesCS3A02G266200	1378.43	-0.257202	0.0393477	-6.53664	6.29162e-11	2.80367e-09
TraesCS3B02G180900	178.425	-0.493183	0.0754491	-6.53664	6.29174e-11	2.80367e-09
TraesCS2A02G032400	154.625	0.513612	0.0785833	6.53589	6.32304e-11	2.81558e-09
TraesCS5D02G431900	307.332	0.32086	0.0491033	6.53439	6.38696e-11	2.84199e-09
TraesCS7B02G270200	165.157	-0.419239	0.0641669	-6.53358	6.42166e-11	2.85537e-09
TraesCS1A02G213000	1300.67	-0.263079	0.0402673	-6.53332	6.43291e-11	2.85831e-09
TraesCS1A02G400200	452.497	0.320223	0.0490183	6.53273	6.45807e-11	2.86742e-09
TraesCS6D02G183600	953.76	-0.326739	0.0500231	-6.53175	6.5004e-11	2.88414e-09
TraesCS1B02G207600	77.9865	0.702077	0.107491	6.53151	6.5111e-11	2.88681e-09
TraesCS4B02G169500	923.832	-0.433971	0.066455	-6.5303	6.56386e-11	2.90811e-09
TraesCS1D02G155000	499.398	-0.363843	0.0557189	-6.52997	6.57847e-11	2.91249e-09
TraesCS3D02G326700	531.312	-0.321365	0.0492306	-6.52774	6.67675e-11	2.95387e-09
TraesCS3D02G250800	658.113	0.294887	0.0451774	6.5273	6.6965e-11	2.96049e-09
TraesCS2B02G231400	94.5806	0.468248	0.0717516	6.52596	6.75676e-11	2.98499e-09
TraesCS1A02G090000	1159.29	-0.316358	0.0484848	-6.52489	6.80513e-11	3.0042e-09
TraesCS6B02G162300	2304.11	0.278982	0.0427673	6.52326	6.87943e-11	3.03483e-09
TraesCS6B02G253300	153.699	-0.467456	0.0716857	-6.52091	6.98815e-11	3.08058e-09
TraesCS6D02G167100	56.5534	-0.689196	0.105694	-6.5207	6.9981e-11	3.08277e-09
TraesCS4B02G242600	795.39	-0.34595	0.0530741	-6.51825	7.11343e-11	3.13133e-09
TraesCS2A02G270100	819.741	0.366059	0.056163	6.5178	7.13478e-11	3.13849e-09
TraesCS2A02G380200	1151.49	-0.369831	0.0567464	-6.51726	7.16036e-11	3.14708e-09
TraesCS6A02G163500	36.1003	-0.955616	0.14663	-6.51717	7.16453e-11	3.14708e-09
TraesCS2A02G263700	199.328	0.537531	0.0824884	6.51644	7.1996e-11	3.16024e-09
TraesCS7D02G257300	5140.97	0.313543	0.0481176	6.51617	7.21231e-11	3.16356e-09
TraesCS4A02G391900	58.9389	2.5442	0.390474	6.51566	7.23695e-11	3.17211e-09
TraesCS5A02G153900	926.445	-0.772105	0.118526	-6.51424	7.3057e-11	3.19803e-09
TraesCS5D02G522700	353.259	0.390813	0.0599938	6.51423	7.30646e-11	3.19803e-09
TraesCS2A02G397400	3713.14	-0.415477	0.0637822	-6.514	7.31734e-11	3.20052e-09
TraesCS1A02G143900	1133.39	-0.33544	0.0515075	-6.51245	7.39339e-11	3.23149e-09
TraesCS2A02G273400	116.025	0.482207	0.0740788	6.50938	7.54607e-11	3.29588e-09
TraesCS5D02G460700	102.365	0.928449	0.142655	6.50836	7.59767e-11	3.31607e-09
TraesCS5D02G181600	1176.55	-0.266461	0.0409422	-6.50822	7.60445e-11	3.31668e-09
TraesCS6B02G023300	135.803	0.441023	0.0677709	6.50755	7.63841e-11	3.32914e-09
TraesCS5B02G413100	365.151	-0.506646	0.0778837	-6.50517	7.76075e-11	3.38007e-09
TraesCS1B02G229900	1342.33	-0.225241	0.0346327	-6.5037	7.83663e-11	3.41071e-09
TraesCS6A02G158700	221.014	-0.377352	0.0580274	-6.503	7.87346e-11	3.42432e-09
TraesCS1B02G089000	132.649	-0.738875	0.113624	-6.50281	7.88359e-11	3.42631e-09
TraesCS2B02G281000	1427.21	-0.280644	0.0431596	-6.50248	7.90088e-11	3.4314e-09
TraesCS1A02G412900	4367.17	-0.212549	0.0326924	-6.50148	7.95326e-11	3.45172e-09
TraesCS5A02G524300	269.264	0.553931	0.0852394	6.49854	8.11052e-11	3.51749e-09
TraesCS1D02G242600	641.616	-0.27216	0.0418912	-6.49683	8.20286e-11	3.55503e-09
TraesCS7A02G546400	1801.38	-0.279057	0.0429749	-6.49348	8.38762e-11	3.63255e-09
TraesCS7A02G446000	3165.52	0.316863	0.0488132	6.49134	8.50777e-11	3.682e-09
TraesCS6A02G134200	82.9113	0.939593	0.144779	6.48985	8.59193e-11	3.71581e-09
TraesCS1A02G004200	343.757	0.39031	0.0601474	6.48923	8.62782e-11	3.72808e-09
TraesCS6A02G011400	2673.78	0.279121	0.0430136	6.48915	8.6324e-11	3.72808e-09
TraesCS7B02G101000	578.954	-0.301947	0.0465476	-6.48683	8.76598e-11	3.78312e-09
TraesCS5D02G014400	1221.75	0.363535	0.0560702	6.48357	8.95769e-11	3.86315e-09
TraesCS4D02G280500	685.013	-0.297742	0.0459266	-6.483	8.99153e-11	3.87504e-09
TraesCS5B02G248100	710.422	0.305722	0.0471746	6.48065	9.13309e-11	3.93329e-09
TraesCS3D02G219500	1261.45	-0.295617	0.0456163	-6.48051	9.14143e-11	3.93413e-09
TraesCS6D02G332000	4807.86	0.321544	0.0496288	6.47898	9.23462e-11	3.97147e-09
TraesCS1A02G190200	1035.99	-0.259566	0.0400795	-6.4763	9.40019e-11	4.03967e-09
TraesCS3D02G217700	1314.63	-0.294653	0.0454979	-6.4762	9.40631e-11	4.03967e-09
TraesCS4A02G190100	267.153	-0.376211	0.0581104	-6.47408	9.53926e-11	4.09391e-09
TraesCS3D02G204000	529.061	-0.436578	0.0674392	-6.47366	9.56573e-11	4.10241e-09
TraesCS1B02G166700	433.949	0.275861	0.042615	6.47333	9.58649e-11	4.10691e-09
TraesCS7A02G552400	39623.6	-0.382323	0.0590616	-6.47328	9.58954e-11	4.10691e-09
TraesCS5A02G192600	449.527	0.312013	0.0482116	6.47175	9.68767e-11	4.14605e-09
TraesCS2A02G292100	951.874	0.244982	0.0378664	6.46962	9.8247e-11	4.20178e-09
TraesCS1A02G272400	305.58	-0.344818	0.0533024	-6.46909	9.85935e-11	4.21368e-09
TraesCS3A02G203700	741.497	-0.373763	0.0577831	-6.46839	9.90555e-11	4.23049e-09
TraesCS6A02G289100	428.787	-0.275385	0.0425758	-6.46811	9.92346e-11	4.2352e-09
TraesCS1B02G238400	44.5508	0.66435	0.102743	6.46616	1.00525e-10	4.28722e-09
TraesCS3B02G559200	46.2014	0.775558	0.119943	6.46606	1.00593e-10	4.28722e-09
TraesCS1D02G259200	124.131	0.491761	0.0760607	6.46537	1.0105e-10	4.30374e-09
TraesCS7B02G288900	146.153	0.489051	0.0756594	6.46385	1.02071e-10	4.3442e-09
TraesCS2D02G442500	1520.9	0.727593	0.112586	6.46256	1.02948e-10	4.37853e-09
TraesCS2D02G497100	151.219	0.456936	0.0707103	6.46208	1.03273e-10	4.38933e-09
TraesCS1B02G278500	1553.16	-0.319259	0.0494119	-6.46117	1.03894e-10	4.40962e-09
TraesCS4A02G071300	3138.07	-0.207095	0.0320517	-6.46127	1.03825e-10	4.40962e-09
TraesCS6A02G134500	42.5894	1.60292	0.248092	6.46099	1.04023e-10	4.41206e-09
TraesCS5B02G396700	396.169	-0.373411	0.057805	-6.45983	1.04817e-10	4.44269e-09
TraesCS7A02G162200	1156.67	0.389428	0.0602874	6.45952	1.05036e-10	4.44892e-09
TraesCS2B02G292500	366.278	0.334809	0.0518454	6.45782	1.06219e-10	4.49591e-09
TraesCS5B02G190200	206.521	-0.401124	0.0621243	-6.4568	1.06939e-10	4.5233e-09
TraesCS3B02G127700	132.395	-0.475042	0.0735782	-6.45629	1.07304e-10	4.53563e-09
TraesCS2D02G479500	653.556	0.263212	0.0407977	6.45164	1.10647e-10	4.67372e-09
TraesCS4D02G027800	723.218	-0.353211	0.0547487	-6.45149	1.10752e-10	4.67497e-09
TraesCS3D02G482200	719.017	-0.371743	0.0576231	-6.45128	1.10909e-10	4.67836e-09
TraesCS6D02G269800	532.198	-0.282583	0.0438089	-6.45036	1.11582e-10	4.70032e-09
TraesCS7B02G037500	38.2916	0.956049	0.148214	6.45046	1.11512e-10	4.70032e-09
TraesCS5A02G103800	709.919	-0.234163	0.0363159	-6.44796	1.13367e-10	4.77224e-09
TraesCS4A02G054800	3361.11	-0.235648	0.0365612	-6.44529	1.15381e-10	4.85374e-09
TraesCS1B02G231400	860.444	0.261075	0.0405077	6.44507	1.1555e-10	4.85421e-09
TraesCS3D02G531900	227.339	0.862214	0.133778	6.44513	1.155e-10	4.85421e-09
TraesCS3D02G048200	2215.36	0.310388	0.0481643	6.44436	1.16087e-10	4.87345e-09
TraesCS5D02G217000	898.556	-0.303951	0.0471759	-6.44291	1.172e-10	4.91683e-09
TraesCS2D02G084300	983.054	0.280961	0.0436141	6.44196	1.17938e-10	4.94442e-09
TraesCS6A02G165600	2418.47	-0.192864	0.0299437	-6.44089	1.18775e-10	4.97611e-09
TraesCS4A02G058800	782.757	-0.349	0.0541952	-6.43968	1.19722e-10	5.01237e-09
TraesCS2D02G018600	1566.64	-0.290305	0.0450842	-6.43916	1.20134e-10	5.0262e-09
TraesCS7A02G078400	178.863	0.416337	0.0646823	6.43665	1.22139e-10	5.10663e-09
TraesCS1B02G379200	4183.41	-0.367541	0.0571184	-6.43472	1.23703e-10	5.16501e-09
TraesCS3A02G537600	693.591	0.350142	0.0544137	6.43481	1.23624e-10	5.16501e-09
TraesCS5A02G121000	829.943	-0.294112	0.045721	-6.43276	1.25307e-10	5.22844e-09
TraesCS2A02G042400	554.562	0.372241	0.0578692	6.43246	1.25558e-10	5.23537e-09
TraesCS1B02G148200	452.542	-0.314159	0.0488409	-6.43229	1.25697e-10	5.23762e-09
TraesCS7A02G054900	972.106	-0.32706	0.0508527	-6.43152	1.26332e-10	5.26055e-09
TraesCS1A02G411600	2060.08	-0.415192	0.064561	-6.431	1.26766e-10	5.27504e-09
TraesCS7A02G261900	992.397	-0.369276	0.0574255	-6.43052	1.27167e-10	5.28816e-09
TraesCS1D02G451000	253.91	0.565457	0.0879357	6.43035	1.27308e-10	5.29043e-09
TraesCS4A02G258800	84.569	0.552112	0.085867	6.42985	1.27728e-10	5.30435e-09
TraesCS6D02G098600	121.086	0.488615	0.0760014	6.42902	1.28428e-10	5.32981e-09
TraesCS5A02G325600	817.752	0.258302	0.0401901	6.42702	1.3013e-10	5.39681e-09
TraesCS2D02G428100	610.602	-0.686224	0.106782	-6.42641	1.30653e-10	5.41486e-09
TraesCS2A02G313200	206.482	-0.382375	0.0595031	-6.42613	1.30891e-10	5.42106e-09
TraesCS4D02G227900	3272.27	-0.224635	0.0349579	-6.42586	1.31127e-10	5.42721e-09
TraesCS4B02G259600	1572.99	-0.253732	0.0394928	-6.42476	1.32077e-10	5.46286e-09
TraesCS2A02G365400	132.003	-0.597608	0.0930226	-6.42433	1.32453e-10	5.47472e-09
TraesCS4A02G353300	433.395	0.318094	0.0495227	6.42321	1.33432e-10	5.51148e-09
TraesCS7B02G159700	5243.61	-0.241185	0.0375639	-6.42067	1.35674e-10	5.60035e-09
TraesCS3D02G078700	1587.95	-0.419434	0.0653349	-6.41975	1.36499e-10	5.63064e-09
TraesCS7A02G347300	196.967	0.64899	0.101095	6.4196	1.3663e-10	5.63228e-09
TraesCS3A02G090000	571.612	-0.275232	0.0428798	-6.41869	1.37452e-10	5.66237e-09
TraesCS5A02G184900	396.63	0.384745	0.0599442	6.41838	1.3773e-10	5.67002e-09
TraesCS6B02G205800	1142.15	-0.203047	0.0316367	-6.41808	1.38008e-10	5.67766e-09
TraesCS6D02G212000	6164.65	-0.333945	0.0520343	-6.41778	1.38273e-10	5.6848e-09
TraesCS2D02G104900	160.302	0.457394	0.0712884	6.4161	1.39812e-10	5.74423e-09
TraesCS4A02G154000	2603.74	-0.348589	0.0543317	-6.41593	1.39962e-10	5.74654e-09
TraesCS5B02G151200	1011.66	-0.217946	0.033971	-6.41566	1.40211e-10	5.75295e-09
TraesCS2A02G503900	80.3266	0.650655	0.101428	6.41497	1.40847e-10	5.7752e-09
TraesCS4A02G043500	86.9078	-0.782938	0.122091	-6.41275	1.42921e-10	5.85632e-09
TraesCS5B02G152500	6985.93	0.29976	0.0467652	6.40989	1.45629e-10	5.96335e-09
TraesCS3B02G032000	292.203	0.401655	0.062693	6.40669	1.4871e-10	6.08547e-09
TraesCS6B02G185700	874.112	0.333397	0.0520408	6.40645	1.48946e-10	6.09105e-09
TraesCS1B02G140400	3925.88	-0.202279	0.0315814	-6.40501	1.50363e-10	6.14492e-09
TraesCS2B02G171100	679.228	0.264374	0.0412802	6.40439	1.50968e-10	6.1656e-09
TraesCS7D02G000100	1090.46	-0.248012	0.038726	-6.40427	1.5109e-10	6.16648e-09
TraesCS7B02G412300	182	0.373149	0.0582903	6.40156	1.53793e-10	6.27263e-09
TraesCS5B02G494600	153.944	0.728746	0.113863	6.4002	1.5517e-10	6.32463e-09
TraesCS3A02G147000	519.114	0.343564	0.0536881	6.39926	1.56135e-10	6.35973e-09
TraesCS6D02G066700	20654.5	0.369812	0.0577931	6.39889	1.56507e-10	6.37067e-09
TraesCS2D02G244700	886.743	-0.226648	0.0354245	-6.39805	1.57371e-10	6.40163e-09
TraesCS7A02G269800	636.86	-0.243755	0.0381038	-6.39714	1.58319e-10	6.43595e-09
TraesCS2D02G170600	6593.67	-0.269972	0.0422042	-6.39681	1.58656e-10	6.44539e-09
TraesCS1D02G061400	167.485	0.433767	0.0678257	6.39532	1.6021e-10	6.50048e-09
TraesCS7D02G147900	13.2674	-1.60663	0.25122	-6.39531	1.60223e-10	6.50048e-09
TraesCS2A02G204200	152.01	-0.520193	0.0813424	-6.39511	1.60436e-10	6.50057e-09
TraesCS3D02G237500	3214.42	-0.232168	0.0363038	-6.39513	1.60409e-10	6.50057e-09
TraesCS6A02G333100	864.737	0.335626	0.052483	6.39495	1.60603e-10	6.50306e-09
TraesCS7D02G473600	168.847	0.400189	0.062584	6.39443	1.61148e-10	6.52084e-09
TraesCS3A02G308300	234.83	0.379233	0.0593181	6.3932	1.62446e-10	6.56903e-09
TraesCS6D02G214200	702.127	-0.325599	0.0509314	-6.39289	1.62783e-10	6.57835e-09
TraesCS7B02G217200	1371.93	-0.281749	0.0440743	-6.39259	1.631e-10	6.58686e-09
TraesCS2A02G236600	1446.74	-0.241368	0.0377598	-6.39219	1.63526e-10	6.59687e-09
TraesCS7D02G467000	1732.11	0.354625	0.0554782	6.39216	1.63562e-10	6.59687e-09
TraesCS5D02G172800	2741.34	-0.298933	0.0467775	-6.39053	1.65309e-10	6.66296e-09
TraesCS5A02G296900	1220.46	-0.237807	0.0372131	-6.3904	1.65453e-10	6.6644e-09
TraesCS5B02G107700	3385.12	-0.394703	0.0617779	-6.38907	1.66898e-10	6.71383e-09
TraesCS5D02G505900	631.038	0.393824	0.0616397	6.38914	1.66824e-10	6.71383e-09
TraesCS7B02G166500	231.364	-0.418534	0.0655091	-6.38894	1.67036e-10	6.71499e-09
TraesCS5B02G464500	4788.48	-0.222742	0.0348766	-6.38656	1.69658e-10	6.81597e-09
TraesCS1D02G111300	1805.84	-0.259435	0.0406266	-6.38583	1.70472e-10	6.83976e-09
TraesCS3D02G240600	200.884	0.430537	0.0674197	6.38592	1.70375e-10	6.83976e-09
TraesCS2D02G230600	399.747	0.315727	0.0494486	6.38494	1.71463e-10	6.87501e-09
TraesCS1A02G121300	1105.42	-0.265077	0.0415183	-6.38459	1.71855e-10	6.88554e-09
TraesCS1B02G133100	531.596	0.27224	0.0426407	6.38451	1.71949e-10	6.88554e-09
TraesCS3B02G268800	1681.01	-0.222748	0.0348917	-6.384	1.7252e-10	6.90395e-09
TraesCS5A02G051400	409.756	0.355559	0.0557004	6.38342	1.73177e-10	6.92574e-09
TraesCS6B02G013300	526.543	0.325549	0.0510444	6.37777	1.79687e-10	7.18142e-09
TraesCS4A02G122200	1006.37	-0.436982	0.068522	-6.37724	1.80306e-10	7.20149e-09
TraesCS5B02G433300	1865.48	-0.182007	0.0285412	-6.37699	1.806e-10	7.20391e-09
TraesCS5D02G031700	24.6381	1.99038	0.312117	6.37701	1.80576e-10	7.20391e-09
TraesCS2D02G095000	116.818	0.559894	0.0878061	6.37648	1.81204e-10	7.2219e-09
TraesCS5A02G089500	738.23	0.292266	0.0458356	6.37641	1.81286e-10	7.2219e-09
TraesCS4B02G139000	382.596	-0.291663	0.0457512	-6.37499	1.8298e-10	7.28468e-09
TraesCS4B02G248700	2668.99	-0.243035	0.0381264	-6.37444	1.83627e-10	7.30573e-09
TraesCS1B02G061600	287.024	0.372271	0.0584199	6.37234	1.86165e-10	7.39715e-09
TraesCS4A02G035500	7547.44	-0.185373	0.0290899	-6.3724	1.86091e-10	7.39715e-09
TraesCS4B02G175300	1090.1	-0.255298	0.0400719	-6.37101	1.87793e-10	7.45704e-09
TraesCS5B02G359700	7958.43	-0.266306	0.0418019	-6.37065	1.88227e-10	7.46947e-09
TraesCS5A02G264000	1573.66	-0.339413	0.0532992	-6.36807	1.91421e-10	7.59132e-09
TraesCS5D02G517100	139.285	0.48114	0.0755629	6.36741	1.92243e-10	7.619e-09
TraesCS1B02G312900	301.758	-0.397852	0.0624874	-6.36692	1.9286e-10	7.63853e-09
TraesCS4A02G346600	159.186	0.449907	0.0706646	6.36679	1.93021e-10	7.64002e-09
TraesCS4D02G136700	390.771	0.343562	0.0539732	6.36542	1.9475e-10	7.7035e-09
TraesCS7A02G269100	1186.05	-0.351448	0.0552147	-6.36512	1.9514e-10	7.71396e-09
TraesCS1D02G164400	19.4754	1.25759	0.197579	6.36498	1.95311e-10	7.71577e-09
TraesCS5D02G403300	1008.42	0.281057	0.0441797	6.36167	1.99568e-10	7.8789e-09
TraesCS2D02G303800	58.509	1.23196	0.193661	6.36144	1.99872e-10	7.88584e-09
TraesCS1A02G224000	5102.16	-0.262144	0.0412136	-6.36062	2.00939e-10	7.92056e-09
TraesCS4D02G116000	591.307	0.275127	0.043255	6.36057	2.01009e-10	7.92056e-09
TraesCS1D02G153300	1357.78	-0.183094	0.0287875	-6.36021	2.01484e-10	7.93422e-09
TraesCS2A02G431800	708.968	0.331557	0.0521339	6.35972	2.02127e-10	7.95446e-09
TraesCS7D02G550300	265.556	0.367637	0.0578104	6.35936	2.02593e-10	7.96771e-09
TraesCS3B02G147600	847.32	-0.368591	0.0579796	-6.35726	2.05389e-10	8.07252e-09
TraesCS5A02G192500	460.495	-0.322886	0.0507913	-6.3571	2.05594e-10	8.07542e-09
TraesCS1B02G057800	1083.37	-0.303268	0.0477085	-6.35669	2.06152e-10	8.09156e-09
TraesCS4A02G126200	381.899	-0.390688	0.0614618	-6.3566	2.06267e-10	8.09156e-09
TraesCS6D02G182300	694.18	-0.264953	0.0417045	-6.3531	2.11013e-10	8.27245e-09
TraesCS3D02G332800	10096.1	-0.259299	0.0408193	-6.35235	2.12053e-10	8.30796e-09
TraesCS5A02G550800	2812.65	-0.229737	0.0361741	-6.35086	2.1411e-10	8.38322e-09
TraesCS1D02G121900	3035.89	-0.234492	0.0369366	-6.3485	2.1742e-10	8.50741e-09
TraesCS1D02G257400	916.789	0.334449	0.0526857	6.34799	2.18146e-10	8.53041e-09
TraesCS3A02G179100	273.867	0.463224	0.0729823	6.34707	2.1945e-10	8.57051e-09
TraesCS7B02G243000	365.931	0.760221	0.119775	6.34709	2.19421e-10	8.57051e-09
TraesCS1A02G360500	3180.99	-0.246397	0.0388252	-6.34632	2.20533e-10	8.60734e-09
TraesCS5A02G186600	89.8498	0.581857	0.0916993	6.34527	2.22034e-10	8.66046e-09
TraesCS4A02G115000	1633.78	-0.232767	0.0367055	-6.34146	2.27591e-10	8.87161e-09
TraesCS7A02G317600	1359.66	-0.273597	0.0431624	-6.33878	2.31592e-10	9.02183e-09
TraesCS5A02G040600	1341.68	0.264937	0.0418165	6.33571	2.36254e-10	9.19764e-09
TraesCS2B02G354100	305.909	0.426298	0.0672869	6.33553	2.36528e-10	9.20248e-09
TraesCS2A02G146100	119.65	-0.563784	0.089001	-6.33458	2.37994e-10	9.25368e-09
TraesCS5B02G023900	1669.29	0.640962	0.101217	6.33257	2.41104e-10	9.36868e-09
TraesCS7D02G309500	14578.4	0.285511	0.0450929	6.33162	2.42593e-10	9.42062e-09
TraesCS4B02G144900	8499.82	-0.321621	0.0508113	-6.32972	2.45612e-10	9.53184e-09
TraesCS3A02G170300	184.308	-0.455168	0.0719543	-6.32579	2.51936e-10	9.77113e-09
TraesCS2A02G235500	427.969	-0.318694	0.0503902	-6.32453	2.54002e-10	9.84505e-09
TraesCS6B02G163300	918.263	-0.248236	0.0392592	-6.32299	2.56556e-10	9.93779e-09
TraesCS7D02G261500	651.279	-0.382259	0.0604612	-6.32239	2.57543e-10	9.96977e-09
TraesCS6A02G360700	941.621	-0.491144	0.0776906	-6.32179	2.58547e-10	1.00023e-08
TraesCS7A02G495400	398.495	-0.278138	0.0439992	-6.32143	2.59157e-10	1.00197e-08
TraesCS5D02G425600	1089.03	-0.317286	0.0502088	-6.31933	2.62695e-10	1.01501e-08
TraesCS5A02G114200	1583.61	-0.320084	0.0506549	-6.31891	2.63411e-10	1.01714e-08
TraesCS6B02G176600	1455.1	-0.23711	0.0375259	-6.31858	2.63972e-10	1.01866e-08
TraesCS6D02G103200	145.522	0.529195	0.0837559	6.31829	2.64467e-10	1.01994e-08
TraesCS6A02G221400	526.853	-0.393868	0.0623518	-6.31687	2.66915e-10	1.02873e-08
TraesCS6D02G059400	35.1252	0.724087	0.114631	6.31669	2.67224e-10	1.02928e-08
TraesCS6D02G006600	1486.3	0.221808	0.0351175	6.31616	2.68143e-10	1.03218e-08
TraesCS6A02G193100	508.427	-0.246608	0.0390714	-6.31173	2.75935e-10	1.0615e-08
TraesCS6A02G199900	936.344	-0.213309	0.0338153	-6.30805	2.82566e-10	1.08634e-08
TraesCS5A02G166000	631.442	-0.379336	0.0601388	-6.30767	2.83267e-10	1.08835e-08
TraesCS2A02G284300	1089.98	-0.271539	0.0430517	-6.30729	2.83959e-10	1.09033e-08
TraesCS5D02G138700	91.5621	-0.619703	0.0982587	-6.30685	2.84763e-10	1.09274e-08
TraesCS2D02G119100	44.5618	1.38902	0.220338	6.30408	2.89913e-10	1.11181e-08
TraesCS2A02G277100	104.314	2.2479	0.356634	6.3031	2.91754e-10	1.11817e-08
TraesCS3A02G257200	49.759	0.866547	0.13749	6.30263	2.92639e-10	1.12087e-08
TraesCS2A02G497200	886.752	0.26561	0.0421542	6.30091	2.95902e-10	1.13266e-08
TraesCS6B02G381500	136.893	0.96046	0.152442	6.3005	2.96691e-10	1.13497e-08
TraesCS7A02G293500	185.37	-0.521965	0.0828551	-6.29973	2.98164e-10	1.1399e-08
TraesCS5B02G286000	1075.9	-0.350349	0.0556171	-6.29931	2.98971e-10	1.14228e-08
TraesCS5A02G375500	655.237	-0.262985	0.0417515	-6.29882	2.99914e-10	1.14517e-08
TraesCS4B02G206000	604.538	0.292229	0.0464011	6.29789	3.01717e-10	1.15088e-08
TraesCS7D02G277900	1117.42	-0.220266	0.0349747	-6.29786	3.01782e-10	1.15088e-08
TraesCS7B02G231000	169.747	0.541177	0.085953	6.2962	3.05031e-10	1.16255e-08
TraesCS2A02G287500	294.161	-0.28022	0.0445119	-6.29539	3.06636e-10	1.16795e-08
TraesCS4A02G315500	3718.91	0.221376	0.0351706	6.29434	3.08718e-10	1.17443e-08
TraesCS7D02G308000	508.49	0.317806	0.0504905	6.29436	3.08674e-10	1.17443e-08
TraesCS5A02G409400	54.616	0.827936	0.131543	6.29402	3.09347e-10	1.17545e-08
TraesCS7A02G295500	1377.19	-0.379244	0.0602548	-6.29401	3.09369e-10	1.17545e-08
TraesCS3D02G267500	595.926	0.36884	0.0586169	6.29237	3.1265e-10	1.18718e-08
TraesCS6B02G230300	3545.92	-0.234686	0.0373034	-6.29129	3.14847e-10	1.19479e-08
TraesCS4B02G115800	1378.42	0.291262	0.0463084	6.28962	3.18254e-10	1.20697e-08
TraesCS7A02G116500	4.8878	-21.169	3.36622	-6.28866	3.20227e-10	1.21371e-08
TraesCS4A02G094400	504.393	0.260272	0.0413937	6.28772	3.22153e-10	1.22026e-08
TraesCS3A02G194200	2198.81	-0.220921	0.0351446	-6.28605	3.25646e-10	1.23265e-08
TraesCS6A02G145500	248.58	-0.342768	0.0545291	-6.28596	3.25824e-10	1.23265e-08
TraesCS3D02G227500	5886.14	0.234522	0.0373128	6.2853	3.27227e-10	1.2372e-08
TraesCS5B02G519400	286.823	-0.326452	0.0519463	-6.28441	3.29108e-10	1.24355e-08
TraesCS6B02G343700	731.308	-0.234988	0.0374223	-6.27936	3.39973e-10	1.28381e-08
TraesCS1A02G331700	339.709	-0.319177	0.0508333	-6.2789	3.40973e-10	1.28601e-08
TraesCS5A02G396100	540.845	-0.289901	0.0461707	-6.27891	3.40958e-10	1.28601e-08
TraesCS2A02G445100	438.654	-0.289224	0.0460656	-6.27851	3.41824e-10	1.28844e-08
TraesCS7D02G295400	716.232	-0.645174	0.102761	-6.27836	3.42153e-10	1.28889e-08
TraesCS6A02G177600	2192.49	-0.199077	0.0317224	-6.27558	3.48338e-10	1.31139e-08
TraesCS6D02G090000	360.785	-0.310957	0.049556	-6.27487	3.49935e-10	1.31659e-08
TraesCS4B02G148900	322.831	-0.346671	0.0552559	-6.27392	3.52069e-10	1.32381e-08
TraesCS2D02G224400	1003.51	0.635543	0.101306	6.27349	3.53036e-10	1.32664e-08
TraesCS5B02G222800	1130.2	-0.273899	0.0436656	-6.27266	3.5493e-10	1.33213e-08
TraesCS7A02G259700	581.584	-0.297449	0.0474198	-6.27269	3.54871e-10	1.33213e-08
TraesCS5B02G113000	566.867	-0.295862	0.0471703	-6.27222	3.55945e-10	1.33513e-08
TraesCS5D02G183100	574.846	-0.214631	0.0342239	-6.27137	3.57878e-10	1.34156e-08
TraesCS2D02G166000	150.502	0.405415	0.0646597	6.26998	3.6109e-10	1.35278e-08
TraesCS1B02G117000	50.5771	0.705895	0.112587	6.26976	3.61614e-10	1.3531e-08
TraesCS7A02G368300	65.2337	0.590916	0.0942472	6.26985	3.61404e-10	1.3531e-08
TraesCS5B02G241100	126.46	0.45472	0.0725312	6.26931	3.62652e-10	1.35534e-08
TraesCS6B02G469100	130.727	0.507969	0.0810242	6.26935	3.62562e-10	1.35534e-08
TraesCS2B02G359400	490.613	-0.710551	0.113353	-6.26846	3.64648e-10	1.36197e-08
TraesCS7A02G178000	610.048	-0.319656	0.0510107	-6.26645	3.69371e-10	1.37878e-08
TraesCS2A02G492400	4544.04	-0.267603	0.0427076	-6.26594	3.70585e-10	1.38247e-08
TraesCS4D02G153700	23.9958	1.88079	0.300184	6.26546	3.71718e-10	1.38586e-08
TraesCS1A02G148400	3216.84	-0.395792	0.0631793	-6.26458	3.73832e-10	1.3929e-08
TraesCS6A02G135300	1162.71	-0.233176	0.0372223	-6.2644	3.74262e-10	1.39366e-08
TraesCS4D02G034600	4143.34	0.282974	0.0451774	6.26362	3.76131e-10	1.39977e-08
TraesCS2A02G273900	223.827	-0.414509	0.0661841	-6.26296	3.77735e-10	1.40489e-08
TraesCS1B02G108800	932.012	-0.242255	0.0386869	-6.26194	3.80217e-10	1.41277e-08
TraesCS5B02G224700	405.594	0.309934	0.0494951	6.2619	3.80311e-10	1.41277e-08
TraesCS4D02G251600	130.74	0.451182	0.0720575	6.26141	3.81518e-10	1.4164e-08
TraesCS1D02G165400	3677.24	0.329234	0.0525916	6.26021	3.8447e-10	1.4265e-08
TraesCS1A02G337800	1084.33	-0.28081	0.0448579	-6.25998	3.85016e-10	1.42766e-08
TraesCS2D02G237300	1116.32	-0.237329	0.037915	-6.25952	3.86169e-10	1.43029e-08
TraesCS7D02G264800	324.813	-0.467117	0.0746252	-6.25951	3.86189e-10	1.43029e-08
TraesCS5D02G368500	63.03	1.16706	0.186451	6.25931	3.86675e-10	1.43123e-08
TraesCS7A02G292400	1285.89	-0.23834	0.03808	-6.25892	3.87641e-10	1.43395e-08
TraesCS3A02G185500	216.389	0.383568	0.0612847	6.25879	3.87987e-10	1.43437e-08
TraesCS3D02G250600	1055.6	-0.391503	0.0625714	-6.2569	3.92717e-10	1.45011e-08
TraesCS6B02G241800	727.687	-0.281837	0.0450437	-6.25697	3.92535e-10	1.45011e-08
TraesCS4A02G044700	17641.9	-0.247362	0.0395455	-6.25512	3.97204e-10	1.4658e-08
TraesCS4B02G094400	770.076	-0.252628	0.0404015	-6.25295	4.02779e-10	1.48549e-08
TraesCS2B02G244400	881.469	0.530517	0.0848575	6.25186	4.05603e-10	1.49501e-08
TraesCS1B02G172400	7612.67	-0.228317	0.0365338	-6.24948	4.11826e-10	1.51703e-08
TraesCS3B02G287800	1728.7	-0.212112	0.0339551	-6.24685	4.1881e-10	1.54184e-08
TraesCS2A02G314800	1565.67	-0.272501	0.043624	-6.24659	4.19511e-10	1.54332e-08
TraesCS3B02G229800	905.372	-0.378132	0.0605349	-6.24651	4.19713e-10	1.54332e-08
TraesCS5B02G232900	2318.11	0.32575	0.052156	6.24569	4.21929e-10	1.55055e-08
TraesCS4D02G252700	347.824	-0.288975	0.0462762	-6.24458	4.24941e-10	1.56068e-08
TraesCS2B02G227800	547.924	-0.321748	0.0515439	-6.24222	4.31416e-10	1.58352e-08
TraesCS7A02G281900	2708.58	-0.223777	0.0358535	-6.24142	4.33604e-10	1.5906e-08
TraesCS5D02G173000	660.369	-0.379354	0.0607815	-6.24129	4.33986e-10	1.59106e-08
TraesCS1A02G340100	19.8803	1.69436	0.271488	6.241	4.34783e-10	1.59303e-08
TraesCS2A02G190900	1958.85	0.46894	0.0751442	6.24053	4.36095e-10	1.59689e-08
TraesCS3D02G231800	136.091	-0.59269	0.0949801	-6.24014	4.37176e-10	1.5999e-08
TraesCS7D02G039400	639.351	0.340073	0.0545039	6.23943	4.3916e-10	1.6062e-08
TraesCS5A02G174300	261.856	0.362282	0.0580706	6.23865	4.41377e-10	1.61335e-08
TraesCS5D02G226100	99.983	0.525428	0.0842468	6.23677	4.46684e-10	1.63179e-08
TraesCS5D02G209200	139.611	0.54382	0.0871981	6.23661	4.47165e-10	1.63258e-08
TraesCS1A02G138800	2508.54	-0.308049	0.049395	-6.23643	4.47667e-10	1.63344e-08
TraesCS5A02G374500	2180.24	-0.328725	0.0527127	-6.23618	4.48395e-10	1.63513e-08
TraesCS3A02G028600	797.341	0.334973	0.0537425	6.23292	4.57815e-10	1.66849e-08
TraesCS6D02G192000	231.686	-0.403957	0.0648599	-6.22815	4.71963e-10	1.71904e-08
TraesCS7B02G279000	48.8065	0.789623	0.12679	6.2278	4.73036e-10	1.72193e-08
TraesCS2B02G378400	2996.08	-0.228084	0.0366247	-6.2276	4.73629e-10	1.72307e-08
TraesCS4A02G294100	2402.39	-0.225547	0.0362268	-6.22598	4.78556e-10	1.73997e-08
TraesCS7D02G350300	2853.02	-0.190237	0.0305562	-6.2258	4.79112e-10	1.74096e-08
TraesCS1D02G415600	189.961	0.367198	0.0589999	6.2237	4.85569e-10	1.76338e-08
TraesCS3D02G543100	911.081	0.356279	0.0572662	6.22145	4.92588e-10	1.78782e-08
TraesCS7A02G212500	491.71	-0.379161	0.0609499	-6.22086	4.94422e-10	1.79342e-08
TraesCS4B02G260600	21735	-0.238491	0.038345	-6.2196	4.98435e-10	1.80691e-08
TraesCS7D02G339600	561.19	0.558194	0.0897611	6.21866	5.01412e-10	1.81664e-08
TraesCS4A02G392300	72.888	1.87894	0.302213	6.21726	5.0591e-10	1.83186e-08
TraesCS2D02G229100	1384.35	-0.243318	0.0391388	-6.21681	5.07369e-10	1.83499e-08
TraesCS5B02G433400	100.858	0.552301	0.0888393	6.21685	5.07243e-10	1.83499e-08
TraesCS6D02G062800	3730.67	-0.573447	0.0922507	-6.21619	5.09386e-10	1.8412e-08
TraesCS5A02G212500	1108.57	0.341563	0.0549501	6.21588	5.10389e-10	1.84374e-08
TraesCS7D02G426000	68.6248	0.899229	0.144694	6.21469	5.14275e-10	1.85669e-08
TraesCS1B02G271800	1288.14	-0.243196	0.0391386	-6.2137	5.17502e-10	1.86725e-08
TraesCS4D02G267600	7119.69	-0.168617	0.0271378	-6.21335	5.18682e-10	1.87041e-08
TraesCS2B02G271200	211.965	-0.33671	0.0541932	-6.21315	5.19325e-10	1.87164e-08
TraesCS3B02G148300	1016.38	-0.319742	0.0514642	-6.21291	5.20135e-10	1.87242e-08
TraesCS3D02G177600	6326.77	-0.223275	0.0359373	-6.2129	5.2015e-10	1.87242e-08
TraesCS7B02G162300	2297.81	0.180878	0.0291247	6.21046	5.28297e-10	1.90064e-08
TraesCS1A02G131200	693.843	-0.26831	0.043204	-6.21029	5.28853e-10	1.90152e-08
TraesCS5B02G341900	1465.26	-0.217312	0.034994	-6.21	5.29861e-10	1.90404e-08
TraesCS1D02G271000	54.5719	-0.962988	0.155074	-6.20986	5.30302e-10	1.90451e-08
TraesCS2A02G089300	386.544	0.37142	0.0598221	6.20874	5.34115e-10	1.91709e-08
TraesCS5A02G449600	344.988	0.346009	0.0557303	6.20862	5.34514e-10	1.9174e-08
TraesCS4D02G194400	55.8859	-0.861901	0.13887	-6.20651	5.4173e-10	1.94216e-08
TraesCS3D02G302700	562.963	0.277185	0.0446628	6.20617	5.42923e-10	1.94531e-08
TraesCS7A02G315916	87.97	0.48593	0.0783183	6.20455	5.48519e-10	1.96421e-08
TraesCS5D02G119400	911.271	-0.252761	0.0407419	-6.20394	5.50652e-10	1.97071e-08
TraesCS4B02G030600	1034.53	-0.341554	0.0550591	-6.20341	5.52519e-10	1.97624e-08
TraesCS6D02G346200	38.2946	0.668183	0.107714	6.2033	5.52916e-10	1.97651e-08
TraesCS7D02G089400	307.717	0.335034	0.0540265	6.20129	5.60023e-10	2.00076e-08
TraesCS4D02G162900	497.536	-0.273221	0.0440604	-6.20106	5.60847e-10	2.00254e-08
TraesCS5A02G442000	825.005	-0.265632	0.0428429	-6.20014	5.64122e-10	2.01307e-08
TraesCS5B02G285500	434.181	-0.446385	0.0720054	-6.19932	5.67079e-10	2.02245e-08
TraesCS5D02G038700	814.045	-0.252281	0.0406996	-6.19862	5.6962e-10	2.03034e-08
TraesCS2B02G443000	9144.03	-0.250744	0.0404607	-6.19722	5.74682e-10	2.0472e-08
TraesCS3A02G124500	164.107	-0.497843	0.0803482	-6.19608	5.78878e-10	2.05857e-08
TraesCS4D02G070700	963.382	-0.271554	0.0438267	-6.19609	5.78818e-10	2.05857e-08
TraesCS6D02G349000	27.4822	1.66593	0.268866	6.19614	5.78649e-10	2.05857e-08
TraesCS2B02G466100	605.92	-0.278125	0.0448935	-6.19522	5.82047e-10	2.06746e-08
TraesCS5A02G032200	1775.7	0.342253	0.0552442	6.19528	5.81823e-10	2.06746e-08
TraesCS2D02G197100	903.022	0.479601	0.0774349	6.19361	5.88011e-10	2.08744e-08
TraesCS6A02G178400	1560.73	-0.189321	0.0305699	-6.19305	5.90093e-10	2.09362e-08
TraesCS3D02G038400	251.63	0.394133	0.0636458	6.19259	5.91835e-10	2.0986e-08
TraesCS7A02G272400	58.5139	0.696183	0.112427	6.19233	5.92823e-10	2.10089e-08
TraesCS3A02G129200	773.147	-0.280242	0.0452795	-6.18916	6.04849e-10	2.14105e-08
TraesCS5A02G122900	815.534	-0.206097	0.0332994	-6.1892	6.04711e-10	2.14105e-08
TraesCS4D02G191300	663.516	-0.356643	0.0576559	-6.18571	6.18248e-10	2.18722e-08
TraesCS4A02G175200	35.8165	0.961925	0.155558	6.18371	6.26128e-10	2.21383e-08
TraesCS2B02G047900	187.093	0.561913	0.0908905	6.18231	6.3169e-10	2.23221e-08
TraesCS1D02G261000	1280.28	-0.219171	0.0354531	-6.18199	6.32994e-10	2.23554e-08
TraesCS1B02G415200	865.867	-0.199358	0.03226	-6.17975	6.42042e-10	2.2662e-08
TraesCS3B02G395600	422.163	-0.577734	0.0935238	-6.1774	6.51638e-10	2.29875e-08
TraesCS7D02G192300	771.237	-0.319366	0.0517009	-6.17717	6.52594e-10	2.3008e-08
TraesCS5B02G162400	573.451	0.257068	0.0416211	6.17639	6.55853e-10	2.31097e-08
TraesCS5B02G159600	859.436	0.317876	0.0514702	6.17592	6.57785e-10	2.31645e-08
TraesCS5A02G096400	419.562	-0.347229	0.0562349	-6.17461	6.63252e-10	2.3333e-08
TraesCS5A02G202800	259.609	0.514774	0.0833696	6.1746	6.63326e-10	2.3333e-08
TraesCS1A02G149200	1404.71	-0.18197	0.0294894	-6.17069	6.79912e-10	2.39028e-08
TraesCS3A02G215500	85.4984	0.623408	0.101038	6.17001	6.82857e-10	2.39927e-08
TraesCS3D02G199500	1488.49	-0.17852	0.0289342	-6.16987	6.83477e-10	2.40007e-08
TraesCS6B02G070500	154.519	0.415356	0.0673219	6.16971	6.84158e-10	2.4011e-08
TraesCS6B02G230900	1141.28	-0.205982	0.0333879	-6.16935	6.85717e-10	2.4052e-08
TraesCS4A02G141500	930.315	-0.272582	0.0441949	-6.16772	6.92836e-10	2.42879e-08
TraesCS3A02G464300	107.886	0.744018	0.120674	6.16554	7.02428e-10	2.46101e-08
TraesCS1B02G139600	5226.41	-0.26854	0.0435693	-6.16351	7.11482e-10	2.49009e-08
TraesCS5D02G481600	1031.27	-0.183807	0.0298218	-6.1635	7.11536e-10	2.49009e-08
TraesCS4B02G239500	324.879	0.304168	0.0493647	6.16164	7.19957e-10	2.51813e-08
TraesCS1D02G374000	1518.31	-0.24358	0.0395382	-6.16062	7.24628e-10	2.53303e-08
TraesCS4A02G398400	304.666	0.394171	0.0639877	6.1601	7.26981e-10	2.53982e-08
TraesCS1D02G048200	577.031	-0.259857	0.0421854	-6.15988	7.2799e-10	2.54073e-08
TraesCS3B02G279700	1135.54	-0.393697	0.0639132	-6.15987	7.28066e-10	2.54073e-08
TraesCS5A02G411500	729.395	-0.40803	0.0662627	-6.15777	7.37769e-10	2.57313e-08
TraesCS4D02G038500	5608.45	0.455307	0.0739553	6.15652	7.43627e-10	2.5921e-08
TraesCS5A02G519200	244.453	0.327929	0.0532676	6.15625	7.44855e-10	2.59491e-08
TraesCS6D02G171000	1462.63	-0.18723	0.0304207	-6.15468	7.52296e-10	2.61935e-08
TraesCS5A02G308900	6987.42	0.26776	0.0435236	6.15206	7.64825e-10	2.66147e-08
TraesCS4B02G139800	551.708	0.309447	0.0503078	6.15108	7.69585e-10	2.67652e-08
TraesCS4A02G275600	461.081	0.457157	0.0743314	6.15025	7.73608e-10	2.68842e-08
TraesCS6D02G004800	5903.56	-0.253523	0.041222	-6.15019	7.73879e-10	2.68842e-08
TraesCS6B02G186400	391.257	-0.355277	0.0577804	-6.14874	7.81033e-10	2.71174e-08
TraesCS4B02G077800	390.468	-0.448117	0.0728875	-6.14806	7.84357e-10	2.72175e-08
TraesCS2B02G195400	623.639	0.222711	0.0362463	6.14438	8.02788e-10	2.78384e-08
TraesCS3B02G255300	1711.77	0.218625	0.0355818	6.1443	8.03151e-10	2.78384e-08
TraesCS1B02G377000	4020.84	-0.243052	0.039568	-6.14262	8.11692e-10	2.81186e-08
TraesCS6B02G238400	1322.41	0.385646	0.0627938	6.14147	8.17607e-10	2.83076e-08
TraesCS4A02G096600	2076.69	-0.196837	0.0320522	-6.14113	8.19339e-10	2.83516e-08
TraesCS7B02G433500	800.507	-0.265874	0.0433022	-6.13995	8.25453e-10	2.85471e-08
TraesCS3A02G170600	247.511	-0.371488	0.0605187	-6.1384	8.33554e-10	2.88111e-08
TraesCS3A02G400200	224.204	0.356624	0.0581011	6.13799	8.35698e-10	2.88691e-08
TraesCS5D02G070800	907.031	-0.224985	0.0366624	-6.13667	8.42718e-10	2.90953e-08
TraesCS7B02G502200	357.851	0.341704	0.0556999	6.13472	8.53088e-10	2.94368e-08
TraesCS1B02G392800	175.833	0.529602	0.0863495	6.13324	8.61064e-10	2.96954e-08
TraesCS1D02G142800	59.6082	0.566351	0.0923511	6.13259	8.64611e-10	2.9801e-08
TraesCS6B02G285900	720.372	0.261937	0.0427132	6.13247	8.65261e-10	2.98068e-08
TraesCS5B02G386500	278.558	0.328173	0.0535188	6.13192	8.68239e-10	2.98927e-08
TraesCS7D02G161500	1307.69	-0.238235	0.0388577	-6.13095	8.73556e-10	3.00589e-08
TraesCS5A02G150700	1616.24	-0.313902	0.051207	-6.13007	8.78406e-10	3.02089e-08
TraesCS6A02G147800	375.678	-0.257816	0.0420583	-6.12996	8.78999e-10	3.02125e-08
TraesCS4A02G159700	1730.52	-0.315822	0.0515325	-6.1286	8.86556e-10	3.04383e-08
TraesCS6B02G184200	368.134	0.299285	0.0488335	6.12868	8.86088e-10	3.04383e-08
TraesCS4A02G284200	1538.23	0.363122	0.0592532	6.12831	8.88151e-10	3.04761e-08
TraesCS2D02G177100	81.3225	1.0664	0.174081	6.12589	9.01756e-10	3.09257e-08
TraesCS4B02G020300	42739.2	0.365755	0.0597185	6.12465	9.08816e-10	3.11504e-08
TraesCS4B02G118300	1188.38	0.337666	0.0551332	6.12455	9.0938e-10	3.11525e-08
TraesCS3B02G169100	2024.66	0.242881	0.0396592	6.12419	9.11447e-10	3.12059e-08
TraesCS7A02G377800	1017.41	-0.233067	0.0380597	-6.12372	9.14159e-10	3.12814e-08
TraesCS3D02G460900	84.509	0.60111	0.0981789	6.1226	9.20606e-10	3.14715e-08
TraesCS5A02G120200	548.533	-0.331734	0.0541821	-6.12258	9.20735e-10	3.14715e-08
TraesCS2D02G239600	555.56	-0.306137	0.0500076	-6.12182	9.25151e-10	3.16049e-08
TraesCS7B02G196700	702.759	-0.252624	0.0412682	-6.12153	9.26839e-10	3.1645e-08
TraesCS5B02G315600	56.6363	0.731402	0.119492	6.12095	9.30178e-10	3.17414e-08
TraesCS3D02G315900	1504.52	-0.224032	0.0366028	-6.12062	9.32114e-10	3.17899e-08
TraesCS5D02G462800	10692	-0.226284	0.036976	-6.11974	9.37277e-10	3.19483e-08
TraesCS4D02G157700	1728.01	-0.206391	0.0337272	-6.11941	9.39253e-10	3.1998e-08
TraesCS4D02G028100	769.009	-0.404092	0.0660377	-6.11911	9.40994e-10	3.20395e-08
TraesCS5D02G182300	964.316	-0.277553	0.0453685	-6.11774	9.49118e-10	3.22983e-08
TraesCS1D02G164500	1506.91	-0.290089	0.0474274	-6.11648	9.56674e-10	3.25375e-08
TraesCS7D02G058400	717.151	0.197113	0.032229	6.11601	9.59472e-10	3.26146e-08
TraesCS6D02G048800	155.311	0.51648	0.0844629	6.11488	9.66298e-10	3.28285e-08
TraesCS3D02G178500	3352.58	0.210827	0.0344826	6.11402	9.7153e-10	3.29881e-08
TraesCS5B02G288700	1488.85	-0.214632	0.0351093	-6.11326	9.76144e-10	3.31265e-08
TraesCS3B02G232800	671.533	-0.265388	0.0434236	-6.11161	9.86317e-10	3.34534e-08
TraesCS1B02G390100	246.431	0.458076	0.074955	6.11135	9.87913e-10	3.34891e-08
TraesCS6A02G004600	1773.27	0.221129	0.0361865	6.11083	9.91124e-10	3.35794e-08
TraesCS7A02G278100	1012.08	-0.233485	0.0382137	-6.10996	9.96535e-10	3.37442e-08
TraesCS7B02G275300	1008.6	-0.270742	0.0443202	-6.10878	1.00394e-09	3.39764e-08
TraesCS4D02G093500	144.065	-0.48452	0.0793178	-6.1086	1.00512e-09	3.39975e-08
TraesCS2B02G253100	469.848	-0.404651	0.0662475	-6.10817	1.00782e-09	3.40702e-08
TraesCS7D02G253600	134.581	0.488327	0.0799638	6.10685	1.01616e-09	3.43333e-08
TraesCS2A02G260700	6670.04	0.298643	0.0489037	6.10676	1.01676e-09	3.43346e-08
TraesCS4D02G170100	468.483	-0.341827	0.0559841	-6.10578	1.02297e-09	3.45257e-08
TraesCS1A02G286300	4241.74	-0.321643	0.0527303	-6.09977	1.06218e-09	3.58294e-08
TraesCS4A02G480900	255.554	-0.414928	0.0680335	-6.09888	1.06815e-09	3.6011e-08
TraesCS7D02G323000	453.878	-0.324739	0.0532501	-6.09837	1.07157e-09	3.61063e-08
TraesCS4D02G084800	109.103	0.419168	0.0687514	6.09686	1.0817e-09	3.64279e-08
TraesCS7B02G177400	264.377	0.452571	0.0742557	6.09476	1.096e-09	3.68892e-08
TraesCS3B02G561300	185.524	-0.521207	0.0855479	-6.09257	1.11112e-09	3.73779e-08
TraesCS5D02G377300	281.927	-0.280857	0.0461044	-6.09177	1.1167e-09	3.75451e-08
TraesCS3D02G115000	5.10917	3.13822	0.515209	6.09115	1.12102e-09	3.76696e-08
TraesCS5D02G316000	160.419	0.539008	0.0885026	6.09031	1.12694e-09	3.78482e-08
TraesCS5B02G306200	40.1851	0.700193	0.114975	6.08996	1.12939e-09	3.79096e-08
TraesCS5B02G519300	419.175	-0.247652	0.0406673	-6.08972	1.13109e-09	3.7946e-08
TraesCS4D02G053900	472.814	0.275477	0.045239	6.08938	1.13351e-09	3.80064e-08
TraesCSU02G093400	4024.93	-0.412398	0.0677297	-6.08887	1.13711e-09	3.81065e-08
TraesCS1B02G480900	239.521	0.352063	0.0578257	6.08836	1.14076e-09	3.8208e-08
TraesCS1B02G268500	853.383	0.28246	0.0464	6.08751	1.14682e-09	3.83901e-08
TraesCS1B02G207900	103.41	0.538044	0.0883876	6.08733	1.1481e-09	3.84031e-08
TraesCS7D02G105700	210.832	0.3582	0.0588441	6.08728	1.14846e-09	3.84031e-08
TraesCS1B02G059800	265.363	0.324818	0.0533647	6.08677	1.15213e-09	3.85051e-08
TraesCS4A02G473900	55.7766	0.668321	0.109805	6.08645	1.15439e-09	3.85389e-08
TraesCS5A02G408600	19.1376	1.3213	0.217085	6.08654	1.1538e-09	3.85389e-08
TraesCS5B02G130900	217.503	-0.381896	0.0627545	-6.08555	1.16093e-09	3.87154e-08
TraesCS5D02G056000	336.718	0.315483	0.0518406	6.08563	1.16035e-09	3.87154e-08
TraesCS3D02G376100	1793.37	-0.283977	0.0466683	-6.08501	1.16483e-09	3.88241e-08
TraesCS4B02G156400	259.394	-0.375049	0.0616369	-6.08481	1.16627e-09	3.88514e-08
TraesCS7D02G235200	509.651	-0.442373	0.0727088	-6.08417	1.17093e-09	3.89855e-08
TraesCS1B02G243200	456.758	1.53965	0.25311	6.08294	1.17998e-09	3.92656e-08
TraesCS5D02G142900	256.604	0.380484	0.0625693	6.08101	1.19432e-09	3.97211e-08
TraesCS3B02G473800	2336.5	-0.325825	0.0535818	-6.0809	1.19509e-09	3.97256e-08
TraesCS5D02G098800	267.649	0.425302	0.06996	6.07922	1.20771e-09	4.01234e-08
TraesCS5B02G373600	632.417	-0.527395	0.0867951	-6.07632	1.22972e-09	4.08324e-08
TraesCS6B02G216800	2183.81	-0.225233	0.037075	-6.07506	1.23938e-09	4.1131e-08
TraesCS2A02G187200	2162.04	0.554631	0.091299	6.07488	1.24077e-09	4.11552e-08
TraesCS5A02G443500	41.5474	0.768939	0.126585	6.07448	1.24392e-09	4.12374e-08
TraesCS3D02G186600	657.28	-0.257806	0.0424486	-6.07336	1.2526e-09	4.14805e-08
TraesCS6D02G174800	554.688	-0.212119	0.0349261	-6.07337	1.2525e-09	4.14805e-08
TraesCS1B02G270500	93.9109	0.788571	0.129851	6.07289	1.25627e-09	4.15797e-08
TraesCS3A02G111100	285.421	0.449406	0.0740083	6.07238	1.2603e-09	4.16907e-08
TraesCS1D02G341900	1187.6	-0.309409	0.0509555	-6.07214	1.26218e-09	4.17304e-08
TraesCS1B02G448000	187.532	0.432237	0.0711895	6.07163	1.26618e-09	4.18401e-08
TraesCS5D02G420100	1925.26	-0.232802	0.038345	-6.07126	1.26911e-09	4.19148e-08
TraesCS6B02G441200	68.8117	0.636372	0.104835	6.07025	1.27709e-09	4.21557e-08
TraesCS7D02G057600	215.155	-0.428715	0.0706272	-6.07011	1.27824e-09	4.21709e-08
TraesCS2D02G541400	6208.45	0.301394	0.0496556	6.06969	1.28158e-09	4.22585e-08
TraesCS6D02G337200	616.367	-0.291685	0.0480648	-6.06856	1.2906e-09	4.25333e-08
TraesCS7B02G483900	187.256	0.35205	0.0580133	6.06844	1.29161e-09	4.25437e-08
TraesCS3B02G368600	2778.53	-0.322722	0.0531826	-6.06818	1.29365e-09	4.25881e-08
TraesCS3A02G189800	407.653	-0.221545	0.0365104	-6.06799	1.29519e-09	4.26161e-08
TraesCS5A02G286200	796.101	-0.345736	0.0570058	-6.06493	1.32012e-09	4.34133e-08
TraesCS4D02G109500	3356.69	-0.661096	0.109015	-6.06429	1.32538e-09	4.35629e-08
TraesCS3B02G085200	708.872	-0.22428	0.0369852	-6.06404	1.3274e-09	4.36062e-08
TraesCS3D02G017300	654.191	0.397042	0.0654794	6.06363	1.33086e-09	4.36966e-08
TraesCS6D02G278300	237.266	0.330025	0.0544296	6.06334	1.3332e-09	4.375e-08
TraesCS5B02G063300	879.086	-0.176975	0.0291891	-6.06305	1.33563e-09	4.38062e-08
TraesCS3A02G467900	177.727	0.429384	0.0708411	6.06122	1.35091e-09	4.42841e-08
TraesCS5B02G516000	2091.74	0.387497	0.063949	6.05947	1.3657e-09	4.47449e-08
TraesCS2A02G275800	2589.28	-0.273973	0.0452149	-6.05935	1.36671e-09	4.47544e-08
TraesCS7B02G158900	47.077	-1.10086	0.181688	-6.05904	1.36933e-09	4.48161e-08
TraesCS2A02G150200	78.3659	0.792288	0.130773	6.05851	1.37388e-09	4.49412e-08
TraesCS1B02G217000	1469.02	-0.208478	0.0344304	-6.05505	1.40375e-09	4.58939e-08
TraesCS4B02G191100	261.714	0.397467	0.0656516	6.05418	1.41136e-09	4.61184e-08
TraesCS1B02G061200	401.561	-0.326744	0.0539901	-6.05192	1.43131e-09	4.67454e-08
TraesCS5A02G059500	1371.32	-0.231475	0.0382501	-6.05161	1.43402e-09	4.68093e-08
TraesCS5B02G479100	6343.36	-0.214213	0.0354002	-6.05119	1.43784e-09	4.69091e-08
TraesCS7D02G197100	339.192	-0.369297	0.0610327	-6.0508	1.44126e-09	4.69959e-08
TraesCS2D02G087300	2768.84	-0.255344	0.042204	-6.05024	1.4463e-09	4.71353e-08
TraesCS6B02G228500	223.468	-0.346468	0.0572666	-6.05008	1.4477e-09	4.7156e-08
TraesCS4A02G021600	1143.92	-0.258735	0.0427685	-6.04966	1.45148e-09	4.72541e-08
TraesCS7A02G235200	486.052	-0.407233	0.0673233	-6.04891	1.45828e-09	4.74504e-08
TraesCS3B02G179200	2536.45	0.326329	0.0539592	6.04769	1.46939e-09	4.77867e-08
TraesCS7A02G091800	93.6671	1.65367	0.273523	6.04581	1.48657e-09	4.83198e-08
TraesCS6B02G057179	76.4111	0.654008	0.108184	6.04531	1.49123e-09	4.84458e-08
TraesCS2A02G409000	69.2413	-0.750345	0.124126	-6.04505	1.49368e-09	4.84996e-08
TraesCS6A02G148400	657.636	-0.275729	0.0456474	-6.04041	1.53719e-09	4.98862e-08
TraesCS2A02G066200	7831.79	-0.186392	0.0308648	-6.039	1.5507e-09	5.02982e-08
TraesCS3B02G583800	83.5972	0.774996	0.128378	6.03682	1.57183e-09	5.09569e-08
TraesCS3D02G114600	1192.84	-0.240444	0.039832	-6.03645	1.57546e-09	5.10476e-08
TraesCS4B02G160000	1556.85	-0.260721	0.0431937	-6.03608	1.57902e-09	5.1136e-08
TraesCS2A02G539800	6371.22	0.313495	0.0519379	6.03597	1.58011e-09	5.11445e-08
TraesCS1A02G180100	662.83	0.316812	0.0524976	6.03479	1.59173e-09	5.14934e-08
TraesCS7D02G041700	1301.55	-0.250147	0.0414586	-6.03367	1.60281e-09	5.18247e-08
TraesCS4A02G086000	617.72	0.438873	0.0727633	6.03152	1.62428e-09	5.24913e-08
TraesCS1D02G069400	671.296	-0.255272	0.0423348	-6.02983	1.6413e-09	5.30136e-08
TraesCS2B02G375300	556.352	-0.206326	0.0342201	-6.02938	1.64593e-09	5.31352e-08
TraesCS1D02G081400	954.048	-0.265256	0.0439951	-6.02921	1.64768e-09	5.31639e-08
TraesCS3D02G311900	23.1199	1.06607	0.176836	6.02859	1.65394e-09	5.33299e-08
TraesCS6D02G301200	297.209	-0.338897	0.0562155	-6.02853	1.65455e-09	5.33299e-08
TraesCS3B02G040000	341.186	-0.284861	0.0472662	-6.02674	1.67295e-09	5.38947e-08
TraesCS3B02G305100	465.988	-0.262216	0.0435105	-6.02651	1.67542e-09	5.39462e-08
TraesCS1A02G157500	1832.54	-0.248808	0.041289	-6.02601	1.68057e-09	5.40788e-08
TraesCS1B02G440200	261.156	0.41576	0.0689951	6.02594	1.6813e-09	5.40788e-08
TraesCS4A02G322400	919.187	0.319545	0.0530431	6.02426	1.69886e-09	5.46151e-08
TraesCS2D02G119300	282.986	0.415365	0.0689525	6.02393	1.70235e-09	5.46989e-08
TraesCS6D02G032300	41.5618	0.7608	0.126317	6.02293	1.71284e-09	5.50072e-08
TraesCS7B02G175500	1063.03	-0.227198	0.0377311	-6.0215	1.72804e-09	5.54664e-08
TraesCS2B02G464400	2192.56	0.709728	0.117891	6.0202	1.74199e-09	5.5855e-08
TraesCS3D02G519700	232.691	0.441778	0.0733827	6.02019	1.74209e-09	5.5855e-08
TraesCS5A02G421900	116.073	-0.570093	0.0946979	-6.02012	1.74286e-09	5.5855e-08
TraesCS7B02G210900	364.316	0.301896	0.050177	6.01663	1.78086e-09	5.70431e-08
TraesCS3B02G365900	1325.3	-0.281213	0.046741	-6.01641	1.78332e-09	5.70921e-08
TraesCS6D02G111400	718.988	-0.248036	0.0412476	-6.01334	1.81741e-09	5.81533e-08
TraesCS4B02G148800	257.656	-0.453588	0.0754374	-6.01277	1.82378e-09	5.83269e-08
TraesCS4B02G025200	264.47	0.345905	0.0575332	6.01226	1.8295e-09	5.84795e-08
TraesCS4A02G108300	298.469	-0.300813	0.0500393	-6.01154	1.83773e-09	5.87121e-08
TraesCS2B02G600300	936.011	0.23592	0.0392514	6.01049	1.84966e-09	5.90625e-08
TraesCS1B02G422200	581.027	0.323694	0.0538594	6.00998	1.85541e-09	5.92154e-08
TraesCS2A02G131400	1039.05	-0.279023	0.0464361	-6.00874	1.86972e-09	5.96415e-08
TraesCS2B02G308600	1372.55	-0.191243	0.0318287	-6.00849	1.87259e-09	5.97019e-08
TraesCS3B02G358200	87.8683	0.484934	0.0807094	6.0084	1.87365e-09	5.97049e-08
TraesCS3B02G178100	2362.84	-0.26738	0.0445068	-6.00762	1.88269e-09	5.99621e-08
TraesCS4A02G323700	1263.88	-0.287207	0.0478162	-6.00649	1.89586e-09	6.03501e-08
TraesCS3B02G426400	224.937	0.404911	0.0674137	6.00636	1.89732e-09	6.03579e-08
TraesCS7D02G288100	1009.5	-0.253031	0.0421275	-6.0063	1.89806e-09	6.03579e-08
TraesCS6B02G007300	395.762	0.282286	0.0470033	6.00567	1.90541e-09	6.05292e-08
TraesCS6B02G242700	1694.43	-0.172067	0.0286505	-6.00571	1.90501e-09	6.05292e-08
TraesCS2B02G164500	138.743	0.440945	0.0734316	6.00483	1.91528e-09	6.08115e-08
TraesCS5B02G362800	137.717	0.508799	0.0847671	6.00232	1.94523e-09	6.17305e-08
TraesCS1B02G295600	2265.52	-0.22573	0.0376078	-6.0022	1.94667e-09	6.17445e-08
TraesCS1B02G102700	1696.66	0.396383	0.0660453	6.00168	1.95285e-09	6.19085e-08
TraesCS4A02G355100	223.981	0.396376	0.0660569	6.00053	1.96678e-09	6.23181e-08
TraesCS3B02G223600	323.911	-0.339588	0.056594	-6.00042	1.96804e-09	6.23259e-08
TraesCS5D02G430200	167.876	-0.480797	0.0801426	-5.99927	1.98207e-09	6.27324e-08
TraesCS6B02G425000	4336.45	-0.318432	0.0530791	-5.9992	1.98291e-09	6.27324e-08
TraesCS6B02G267800	87.1015	1.02776	0.171324	5.99895	1.98602e-09	6.27987e-08
TraesCS6D02G085700	338.628	0.294982	0.0491758	5.99852	1.99128e-09	6.29327e-08
TraesCS3D02G199700	190.258	0.653228	0.108905	5.99815	1.99575e-09	6.30416e-08
TraesCS7A02G045900	568.752	0.289187	0.0482141	5.99798	1.99788e-09	6.30765e-08
TraesCS3A02G276700	762.485	-0.329159	0.0548855	-5.99719	2.00762e-09	6.33516e-08
TraesCS6D02G153400	1498.66	-0.224479	0.0374362	-5.99631	2.01852e-09	6.36629e-08
TraesCS5A02G117600	535.737	-0.255111	0.042564	-5.99359	2.05265e-09	6.47061e-08
TraesCS5B02G088100	6961.49	0.701418	0.117064	5.99174	2.07611e-09	6.54125e-08
TraesCS2D02G480600	108.494	0.59711	0.0996703	5.99085	2.08746e-09	6.57364e-08
TraesCS6B02G300300	219.744	-0.455612	0.0760558	-5.99049	2.09205e-09	6.58472e-08
TraesCS3D02G415200	1990.68	-0.238526	0.0398262	-5.98917	2.10909e-09	6.63497e-08
TraesCS7B02G159400	617.103	-0.424285	0.0708436	-5.98904	2.11088e-09	6.63722e-08
TraesCS2A02G282900	1687.57	-0.196741	0.0328543	-5.98828	2.12071e-09	6.66133e-08
TraesCS3A02G333100	520.321	-0.305749	0.0510577	-5.98831	2.12038e-09	6.66133e-08
TraesCS7A02G196500	701.048	-0.507859	0.0848107	-5.98815	2.12238e-09	6.66317e-08
TraesCS2A02G231300	579.33	-0.282492	0.0471804	-5.9875	2.13096e-09	6.6867e-08
TraesCS3A02G347600	227.978	0.436528	0.0729261	5.9859	2.15201e-09	6.74931e-08
TraesCS2D02G488300	1776.51	0.357441	0.0597158	5.9857	2.15458e-09	6.75393e-08
TraesCS4A02G149800	457.247	-0.347012	0.0579888	-5.98412	2.17561e-09	6.8164e-08
TraesCS3D02G213200	1455.01	-0.314078	0.0524887	-5.98373	2.18089e-09	6.82947e-08
TraesCS5A02G168400	4814.53	-0.176713	0.0295368	-5.98283	2.19298e-09	6.86383e-08
TraesCS6A02G136800	245.575	0.496157	0.0829386	5.98222	2.20119e-09	6.88603e-08
TraesCS1D02G196700	150.117	0.502589	0.0840151	5.98213	2.20241e-09	6.88635e-08
TraesCS3A02G104500	836.099	-0.228097	0.0381317	-5.98181	2.20677e-09	6.8965e-08
TraesCS3B02G265700	3124.87	-0.206053	0.0344478	-5.98161	2.20947e-09	6.90142e-08
TraesCS5D02G293800	548.356	-0.474176	0.0792828	-5.98082	2.22017e-09	6.93133e-08
TraesCS6D02G159600	182.82	0.363997	0.0608621	5.98069	2.22191e-09	6.93327e-08
TraesCS6B02G152600	85.0574	0.608079	0.101679	5.98039	2.226e-09	6.94252e-08
TraesCS1B02G354400	446.12	0.260604	0.0435798	5.97992	2.2325e-09	6.95926e-08
TraesCS3B02G359500	403.772	0.378564	0.0633104	5.9795	2.2383e-09	6.97381e-08
TraesCS1B02G060900	413.921	-0.260144	0.0435243	-5.97699	2.27302e-09	7.0784e-08
TraesCS6B02G292700	468.463	0.264936	0.0443334	5.976	2.28688e-09	7.11797e-08
TraesCS5D02G403400	29.0574	-1.15605	0.193452	-5.9759	2.28818e-09	7.11843e-08
TraesCS5B02G189600	160.624	0.385851	0.0645686	5.97582	2.28935e-09	7.11847e-08
TraesCS3B02G373000	4298.64	-0.242166	0.0405276	-5.97534	2.29614e-09	7.13598e-08
TraesCS2A02G128300	459.991	0.257492	0.0430982	5.97456	2.30712e-09	7.1665e-08
TraesCS3A02G411600	33.4475	0.7779	0.130207	5.97435	2.31012e-09	7.17221e-08
TraesCS5B02G451500	195.867	0.382774	0.0640761	5.97374	2.3187e-09	7.1952e-08
TraesCS1D02G406100	162.753	0.558008	0.0934342	5.97221	2.34064e-09	7.25965e-08
TraesCS2D02G360300	124.583	-0.466507	0.0781182	-5.97181	2.34637e-09	7.27374e-08
TraesCS1B02G426300	726.634	-0.358225	0.0599898	-5.97143	2.35182e-09	7.28698e-08
TraesCS5A02G095000	487.834	-0.245933	0.0411862	-5.97124	2.35453e-09	7.28804e-08
TraesCS5B02G053100	26.5196	1.21795	0.203969	5.97124	2.35451e-09	7.28804e-08
TraesCS7D02G421700	214.706	0.351359	0.0588484	5.97059	2.36401e-09	7.31372e-08
TraesCS3A02G130200	2208.64	0.204411	0.0342381	5.97029	2.36836e-09	7.32348e-08
TraesCS4D02G246800	4251.34	-0.408185	0.0683783	-5.96951	2.37961e-09	7.35461e-08
TraesCS2D02G070000	382.827	-0.300722	0.0503911	-5.96776	2.40535e-09	7.43042e-08
TraesCS5D02G515700	157.451	-0.383768	0.06431	-5.96747	2.40958e-09	7.43976e-08
TraesCS1A02G443600	839.845	0.290136	0.0486234	5.96701	2.41638e-09	7.45702e-08
TraesCS7A02G419100	15579.3	0.299389	0.0501844	5.96577	2.43478e-09	7.51005e-08
[truncated: 15,739 more rows]

## Sheet: Table S4
Table S4. GO terms enriched among up- and down-regulated genes from Table S3
category	over_represented_pvalue	under_represented_pvalue	numDEInCat	numInCat	term	ontology	padj_over	direction
GO:0006457	1.80975e-09	1	79	154	protein folding	BP	6.39203e-06	up-regulated
GO:0003723	6.84157e-09	1	256	663	RNA binding	MF	1.20822e-05	up-regulated
GO:0051082	1.1787e-08	1	53	94	unfolded protein binding	MF	1.38772e-05	up-regulated
GO:0003676	1.7211e-08	1	313	845	nucleic acid binding	MF	1.51973e-05	up-regulated
GO:0009408	2.51958e-07	1	33	54	response to heat	BP	0.000177983	up-regulated
GO:0034605	6.42041e-07	1	16	19	cellular response to heat	BP	0.000377948	up-regulated
GO:0005515	9.16491e-06	0.999992	1603	5298	protein binding	MF	0.00462435	up-regulated
GO:0050821	0.000108606	0.999996	9	10	protein stabilization	BP	0.0479497	up-regulated
GO:0016853	0.000148049	0.999955	25	46	isomerase activity	MF	0.0581011	up-regulated
GO:0005737	2.48044e-39	1	568	1147	cytoplasm	CC	1.05195e-35	down-regulated
GO:0000786	2.91379e-35	1	194	442	nucleosome	CC	6.17869e-32	down-regulated
GO:0046982	6.46845e-35	1	195	442	protein heterodimerization activity	MF	9.14423e-32	down-regulated
GO:0003735	2.14303e-31	1	282	587	structural constituent of ribosome	MF	2.27215e-28	down-regulated
GO:0005840	2.3687e-30	1	270	564	ribosome	CC	2.00913e-27	down-regulated
GO:0006412	3.15931e-30	1	300	631	translation	BP	2.2331e-27	down-regulated
GO:0005694	2.61776e-27	1	151	314	chromosome	CC	1.58599e-24	down-regulated
GO:0005829	3.3887e-27	1	332	677	cytosol	CC	1.79643e-24	down-regulated
GO:0005730	2.09331e-21	1	129	240	nucleolus	CC	9.86416e-19	down-regulated
GO:0003924	1.64144e-20	1	192	343	GTPase activity	MF	6.96133e-18	down-regulated
GO:0005525	1.80007e-19	1	222	415	GTP binding	MF	6.94008e-17	down-regulated
GO:0005634	6.53264e-19	1	965	2611	nucleus	CC	2.30874e-16	down-regulated
GO:0005739	1.76817e-18	1	222	429	mitochondrion	CC	5.76832e-16	down-regulated
GO:0005774	3.45543e-17	1	116	227	vacuolar membrane	CC	1.04675e-14	down-regulated
GO:0006334	5.49548e-17	1	92	199	nucleosome assembly	BP	1.49329e-14	down-regulated
GO:0003723	5.63373e-17	1	420	944	RNA binding	MF	1.49329e-14	down-regulated
GO:0009506	4.77917e-16	1	104	206	plasmodesma	CC	1.19226e-13	down-regulated
GO:0022625	5.78799e-15	1	71	123	cytosolic large ribosomal subunit	CC	1.36371e-12	down-regulated
GO:0051082	2.39676e-14	1	64	88	unfolded protein binding	MF	5.34982e-12	down-regulated
GO:0000502	6.40455e-14	1	56	75	proteasome complex	CC	1.35809e-11	down-regulated
GO:0009579	1.40672e-13	1	75	161	thylakoid	CC	2.84091e-11	down-regulated
GO:0006457	2.60262e-13	1	82	129	protein folding	BP	5.01715e-11	down-regulated
GO:0009414	4.54987e-13	1	78	166	response to water deprivation	BP	8.21592e-11	down-regulated
GO:0004298	4.64942e-13	1	42	53	threonine-type endopeptidase activity	MF	8.21592e-11	down-regulated
GO:0005839	5.40455e-13	1	44	57	proteasome core complex	CC	9.16828e-11	down-regulated
GO:0051603	2.629e-12	1	51	71	proteolysis involved in cellular protein catabolic process	BP	4.28831e-10	down-regulated
GO:0050897	7.84869e-11	1	24	26	cobalt ion binding	MF	1.23283e-08	down-regulated
GO:0022627	8.5695e-11	1	46	76	cytosolic small ribosomal subunit	CC	1.29797e-08	down-regulated
GO:0009507	1.28899e-10	1	229	568	chloroplast	CC	1.88503e-08	down-regulated
GO:0000166	1.50327e-10	1	330	743	nucleotide binding	MF	2.12512e-08	down-regulated
GO:0005747	8.23102e-10	1	36	51	mitochondrial respiratory chain complex I	CC	1.12606e-07	down-regulated
GO:0043161	1.13342e-09	1	39	52	proteasome-mediated ubiquitin-dependent protein catabolic process	BP	1.50213e-07	down-regulated
GO:0003824	1.20989e-09	1	418	1029	catalytic activity	MF	1.55489e-07	down-regulated
GO:0006099	1.4685e-08	1	45	66	tricarboxylic acid cycle	BP	1.83173e-06	down-regulated
GO:0042254	2.1167e-08	1	39	63	ribosome biogenesis	BP	2.56483e-06	down-regulated
GO:0016192	2.39846e-08	1	113	223	vesicle-mediated transport	BP	2.82552e-06	down-regulated
GO:0016887	4.89402e-08	1	177	381	ATPase activity	MF	5.60961e-06	down-regulated
GO:0006886	5.93344e-08	1	134	278	intracellular protein transport	BP	6.62204e-06	down-regulated
GO:0016491	8.57402e-08	1	351	912	oxidoreductase activity	MF	9.3237e-06	down-regulated
GO:0003743	1.11605e-07	1	61	111	translation initiation factor activity	MF	1.18329e-05	down-regulated
GO:0003729	1.16274e-07	1	80	157	mRNA binding	MF	1.20272e-05	down-regulated
GO:0015991	2.02677e-07	1	30	42	NA	NA	2.04655e-05	down-regulated
GO:0051287	5.66728e-07	1	68	128	NAD binding	MF	5.58952e-05	down-regulated
GO:0015986	6.67003e-07	1	23	33	ATP synthesis coupled proton transport	BP	6.429e-05	down-regulated
GO:0006520	7.45116e-07	1	37	58	cellular amino acid metabolic process	BP	7.02231e-05	down-regulated
GO:0006413	7.64825e-07	1	45	78	translational initiation	BP	7.05136e-05	down-regulated
GO:0005743	8.94933e-07	1	53	97	mitochondrial inner membrane	CC	8.07534e-05	down-regulated
GO:0030163	1.20615e-06	1	29	41	protein catabolic process	BP	0.000101978	down-regulated
GO:0046961	1.21747e-06	1	16	18	proton-transporting ATPase activity, rotational mechanism	MF	0.000101978	down-regulated
GO:0004739	1.23532e-06	1	16	18	pyruvate dehydrogenase (acetyl-transferring) activity	MF	0.000101978	down-regulated
GO:0006086	1.23532e-06	1	16	18	acetyl-CoA biosynthetic process from pyruvate	BP	0.000101978	down-regulated
GO:0003676	1.25038e-06	0.999999	413	1064	nucleic acid binding	MF	0.000101978	down-regulated
GO:0000470	1.29107e-06	1	16	20	maturation of LSU-rRNA	BP	0.00010331	down-regulated
GO:0005852	1.44221e-06	1	31	48	eukaryotic translation initiation factor 3 complex	CC	0.000113267	down-regulated
GO:0019773	1.71198e-06	1	23	31	proteasome core complex, alpha-subunit complex	CC	0.000132009	down-regulated
GO:0006364	2.16601e-06	0.999999	60	112	rRNA processing	BP	0.000164037	down-regulated
GO:0033290	3.35428e-06	0.999999	26	39	eukaryotic 48S preinitiation complex	CC	0.000245742	down-regulated
GO:0001732	3.36077e-06	0.999999	26	39	formation of cytoplasmic translation initiation complex	BP	0.000245742	down-regulated
GO:0009570	5.89326e-06	0.999997	118	267	chloroplast stroma	CC	0.000423615	down-regulated
GO:0030170	6.92909e-06	0.999997	76	154	pyridoxal phosphate binding	MF	0.000486175	down-regulated
GO:0016282	6.99285e-06	0.999999	25	38	eukaryotic 43S preinitiation complex	CC	0.000486175	down-regulated
GO:0016620	8.7337e-06	0.999997	42	71	oxidoreductase activity, acting on the aldehyde or oxo group of donors, NAD or NADP as acceptor	MF	0.000597413	down-regulated
GO:0000209	9.48636e-06	0.999998	25	37	protein polyubiquitination	BP	0.000638598	down-regulated
GO:1990904	1.11016e-05	0.999998	23	34	ribonucleoprotein complex	CC	0.000735656	down-regulated
GO:0000463	1.48304e-05	0.999999	12	14	maturation of LSU-rRNA from tricistronic rRNA transcript (SSU-rRNA, 5.8S rRNA, LSU-rRNA)	BP	0.000967623	down-regulated
GO:0005622	1.52336e-05	0.999992	97	211	intracellular anatomical structure	CC	0.000978875	down-regulated
GO:0036402	1.68215e-05	0.999997	23	33	proteasome-activating ATPase activity	MF	0.00106477	down-regulated
GO:1901800	1.93439e-05	0.999998	16	20	positive regulation of proteasomal protein catabolic process	BP	0.00120644	down-regulated
GO:0070180	2.22591e-05	0.999999	11	13	large ribosomal subunit rRNA binding	MF	0.00136813	down-regulated
GO:0047834	4.41671e-05	0.999987	30	52	D-threo-aldose 1-dehydrogenase activity	MF	0.00267589	down-regulated
GO:0030008	4.48375e-05	0.999994	16	21	TRAPP complex	CC	0.00267825	down-regulated
GO:0000339	5.65703e-05	1	9	9	RNA cap binding	MF	0.00333215	down-regulated
GO:0005832	5.99431e-05	0.999998	11	12	chaperonin-containing T-complex	CC	0.00348245	down-regulated
GO:0008540	7.38394e-05	0.999991	15	19	proteasome regulatory particle, base subcomplex	CC	0.0042318	down-regulated
GO:0031410	8.37624e-05	0.999979	23	36	cytoplasmic vesicle	CC	0.00472558	down-regulated
GO:0050661	8.46838e-05	0.999966	44	84	NADP binding	MF	0.00472558	down-regulated
GO:0009330	9.07909e-05	1	8	8	DNA topoisomerase type II (double strand cut, ATP-hydrolyzing) complex	CC	0.00500057	down-regulated
GO:0000226	0.000100217	0.999959	44	82	microtubule cytoskeleton organization	BP	0.00544896	down-regulated
GO:0005681	0.000101942	0.999963	35	64	spliceosomal complex	CC	0.00547261	down-regulated
GO:0006418	0.000109444	0.999952	52	97	tRNA aminoacylation for protein translation	BP	0.0058019	down-regulated
GO:0005198	0.000111082	0.999965	30	51	structural molecule activity	MF	0.00581602	down-regulated
GO:0009409	0.000130221	0.999953	34	63	response to cold	BP	0.00673498	down-regulated
GO:0033180	0.000133792	0.999986	13	16	proton-transporting V-type ATPase, V1 domain	CC	0.00683629	down-regulated
GO:0015078	0.00013619	0.999965	22	36	proton transmembrane transporter activity	MF	0.00687598	down-regulated
GO:0070534	0.000163539	0.999983	12	15	protein K63-linked ubiquitination	BP	0.00814934	down-regulated
GO:0016787	0.000165254	0.999882	227	590	hydrolase activity	MF	0.00814934	down-regulated
GO:0007010	0.00016913	0.999971	17	23	cytoskeleton organization	BP	0.00824459	down-regulated
GO:0019904	0.000171268	0.999969	16	23	protein domain specific binding	MF	0.00825396	down-regulated
GO:0008652	0.000173898	0.99995	26	42	cellular amino acid biosynthetic process	BP	0.00828654	down-regulated
GO:0006511	0.000177406	0.999901	82	184	ubiquitin-dependent protein catabolic process	BP	0.00831766	down-regulated
GO:0005960	0.000180435	1	6	6	glycine cleavage complex	CC	0.00831766	down-regulated
GO:0019464	0.000180435	1	6	6	glycine decarboxylation via glycine cleavage system	BP	0.00831766	down-regulated
GO:0046933	0.000204801	0.999962	15	23	proton-transporting ATP synthase activity, rotational mechanism	MF	0.00933936	down-regulated
GO:0009073	0.000214582	0.999964	15	21	aromatic amino acid family biosynthetic process	BP	0.00960463	down-regulated
GO:0002183	0.000215147	0.999984	10	12	cytoplasmic translational initiation	BP	0.00960463	down-regulated
GO:0005874	0.000243604	0.999877	62	129	microtubule	CC	0.0106924	down-regulated
GO:0019903	0.000244556	1	8	8	protein phosphatase binding	MF	0.0106924	down-regulated
GO:0008017	0.000264591	0.999841	105	229	microtubule binding	MF	0.0114503	down-regulated
GO:0000398	0.000278046	0.999864	55	117	mRNA splicing, via spliceosome	BP	0.0118087	down-regulated
GO:0006006	0.000278443	0.999936	19	29	glucose metabolic process	BP	0.0118087	down-regulated
GO:0022626	0.000283821	0.99995	13	21	cytosolic ribosome	CC	0.0119177	down-regulated
GO:0006564	0.000304851	0.999968	11	14	L-serine biosynthetic process	BP	0.0126752	down-regulated
GO:0006811	0.000343489	0.999837	51	104	ion transport	BP	0.0141431	down-regulated
GO:0006265	0.000352951	0.999924	18	26	DNA topological change	BP	0.0142331	down-regulated
GO:1902600	0.000354189	0.999849	41	79	proton transmembrane transport	BP	0.0142331	down-regulated
GO:0043229	0.000355743	0.999875	27	54	intracellular organelle	CC	0.0142331	down-regulated
GO:0019843	0.000374785	0.999858	30	62	rRNA binding	MF	0.0148548	down-regulated
GO:0030126	0.000428093	0.999897	19	29	COPI vesicle coat	CC	0.0168106	down-regulated
GO:0010498	0.000454568	0.99992	14	20	proteasomal protein catabolic process	BP	0.0176864	down-regulated
GO:0046686	0.000458905	0.999834	30	54	response to cadmium ion	BP	0.0176929	down-regulated
GO:0043666	0.000471158	0.99996	10	12	regulation of phosphoprotein phosphatase activity	BP	0.0180016	down-regulated
GO:0008235	0.000480909	0.999976	9	10	metalloexopeptidase activity	MF	0.0182101	down-regulated
GO:0006120	0.000517309	0.999976	8	9	mitochondrial electron transport, NADH to ubiquinone	BP	0.0194151	down-regulated
GO:0002181	0.00053478	0.999816	24	50	cytoplasmic translation	BP	0.0198947	down-regulated
GO:0004332	0.000628212	0.999935	9	12	fructose-bisphosphate aldolase activity	MF	0.0231674	down-regulated
GO:0030663	0.000636067	0.999967	9	10	COPI-coated vesicle membrane	CC	0.0232548	down-regulated
GO:0031929	0.000645861	1	7	7	TOR signaling	BP	0.0233099	down-regulated
GO:0009423	0.000648566	0.999924	11	14	chorismate biosynthetic process	BP	0.0233099	down-regulated
GO:0000902	0.000689963	0.999938	10	12	cell morphogenesis	BP	0.0245893	down-regulated
GO:0006470	0.00070228	0.99965	52	107	protein dephosphorylation	BP	0.0248197	down-regulated
GO:0006098	0.000780938	0.99982	16	25	pentose-phosphate shunt	BP	0.027323	down-regulated
GO:0016740	0.000785995	0.999424	213	551	transferase activity	MF	0.027323	down-regulated
GO:0008964	0.000811071	1	7	7	phosphoenolpyruvate carboxylase activity	MF	0.0278912	down-regulated
GO:0006301	0.000815492	0.999906	10	13	postreplication repair	BP	0.0278912	down-regulated
GO:0000027	0.000822869	0.999834	13	21	ribosomal large subunit assembly	BP	0.0279183	down-regulated
GO:0000028	0.000830238	0.999813	14	24	ribosomal small subunit assembly	BP	0.0279448	down-regulated
GO:0015934	0.000861965	0.999682	25	53	large ribosomal subunit	CC	0.0286965	down-regulated
GO:0000956	0.000871926	0.999864	11	16	nuclear-transcribed mRNA catabolic process	BP	0.0286965	down-regulated
GO:0000276	0.000872872	0.999929	8	10	mitochondrial proton-transporting ATP synthase complex, coupling factor F(o)	CC	0.0286965	down-regulated
GO:0072546	0.000907404	0.999894	10	13	EMC complex	CC	0.0296023	down-regulated
GO:0004812	0.000939399	0.999517	55	111	aminoacyl-tRNA ligase activity	MF	0.0303264	down-regulated
GO:0007015	0.0009439	0.999649	28	51	actin filament organization	BP	0.0303264	down-regulated
GO:0004721	0.000965531	0.99963	30	54	phosphoprotein phosphatase activity	MF	0.0307881	down-regulated
GO:0008177	0.00101445	1	6	6	succinate dehydrogenase (ubiquinone) activity	MF	0.0321064	down-regulated
GO:0009966	0.00102703	0.999945	8	9	regulation of signal transduction	BP	0.032264	down-regulated
GO:0048364	0.0010416	0.999644	25	43	root development	BP	0.0324152	down-regulated
GO:0008380	0.00104713	0.999609	27	51	RNA splicing	BP	0.0324152	down-regulated
GO:0050790	0.00106275	0.999667	21	37	regulation of catalytic activity	BP	0.0326602	down-regulated
GO:0003918	0.00108698	0.999788	14	20	DNA topoisomerase type II (double strand cut, ATP-hydrolyzing) activity	MF	0.0328767	down-regulated
GO:0031625	0.00109223	0.999729	16	26	ubiquitin protein ligase binding	MF	0.0328767	down-regulated
GO:0043232	0.00109305	0.999834	10	15	intracellular non-membrane-bounded organelle	CC	0.0328767	down-regulated
GO:0047918	0.00114741	1	6	6	GDP-mannose 3,5-epimerase activity	MF	0.0342687	down-regulated
GO:0006376	0.00115587	1	6	6	mRNA splice site selection	BP	0.0342799	down-regulated
GO:0003779	0.0011842	0.999415	46	97	actin binding	MF	0.0348763	down-regulated
GO:0003677	0.00120367	0.998988	586	1865	DNA binding	MF	0.0349396	down-regulated
GO:0031461	0.0012076	0.999934	8	9	cullin-RING ubiquitin ligase complex	CC	0.0349396	down-regulated
GO:0043021	0.00121106	1	6	6	ribonucleoprotein complex binding	MF	0.0349396	down-regulated
GO:0005759	0.00133111	0.999483	28	53	mitochondrial matrix	CC	0.0381436	down-regulated
GO:0009408	0.00136453	0.999506	25	46	response to heat	BP	0.0388388	down-regulated
GO:0016607	0.00139902	0.999788	11	15	nuclear speck	CC	0.039555	down-regulated
GO:0048367	0.00151793	0.999913	8	9	shoot system development	BP	0.0426327	down-regulated
GO:0030234	0.0015469	0.999638	15	23	enzyme regulator activity	MF	0.0431606	down-regulated
GO:0030117	0.00156477	0.99946	24	41	membrane coat	CC	0.0433737	down-regulated
GO:0016624	0.0016079	0.999751	11	15	oxidoreductase activity, acting on the aldehyde or oxo group of donors, disulfide as acceptor	MF	0.0442799	down-regulated
GO:0019853	0.0016406	0.999904	8	9	L-ascorbic acid biosynthetic process	BP	0.044889	down-regulated
GO:0016279	0.00166301	0.999911	7	8	protein-lysine N-methyltransferase activity	MF	0.0452105	down-regulated
GO:1990726	0.00167936	0.999767	9	13	Lsm1-7-Pat1 complex	CC	0.0453641	down-regulated
GO:0010582	0.00170095	1	6	6	floral meristem determinacy	BP	0.0456564	down-regulated
GO:0004478	0.00174248	0.999802	8	11	methionine adenosyltransferase activity	MF	0.0461866	down-regulated
GO:0006556	0.00174248	0.999802	8	11	S-adenosylmethionine biosynthetic process	BP	0.0461866	down-regulated
GO:0030490	0.00179191	0.999913	6	7	maturation of SSU-rRNA	BP	0.0468665	down-regulated
GO:0030865	0.00180912	0.999777	9	12	cortical cytoskeleton organization	BP	0.0468665	down-regulated
GO:0003871	0.00180968	1	6	6	5-methyltetrahydropteroyltriglutamate-homocysteine S-methyltransferase activity	MF	0.0468665	down-regulated
GO:0004421	0.00183443	1	6	6	hydroxymethylglutaryl-CoA synthase activity	MF	0.0468665	down-regulated
GO:0006084	0.00183443	1	6	6	acetyl-CoA metabolic process	BP	0.0468665	down-regulated
GO:0010142	0.00183443	1	6	6	farnesyl diphosphate biosynthetic process, mevalonate pathway	BP	0.0468665	down-regulated
GO:0004775	0.00185263	1	6	6	succinate-CoA ligase (ADP-forming) activity	MF	0.0470478	down-regulated
GO:0019521	0.00187269	1	5	5	D-gluconate metabolic process	BP	0.0472743	down-regulated
GO:0000287	0.00190905	0.998878	70	157	magnesium ion binding	MF	0.0476788	down-regulated
GO:0006096	0.00192242	0.998999	49	104	glycolytic process	BP	0.0476788	down-regulated
GO:0009651	0.00192244	0.999045	41	93	response to salt stress	BP	0.0476788	down-regulated
GO:0005886	0.00195935	0.998527	203	594	plasma membrane	CC	0.0483115	down-regulated
GO:0010466	0.00198436	0.999849	6	8	negative regulation of peptidase activity	BP	0.0483658	down-regulated
GO:0030414	0.00198436	0.999849	6	8	peptidase inhibitor activity	MF	0.0483658	down-regulated
GO:0030687	0.00203918	0.999743	9	12	preribosome, large subunit precursor	CC	0.049418	down-regulated
GO:0005846	0.00205665	1	6	6	nuclear cap binding complex	CC	0.0495582	down-regulated
GO:0046034	0.00208257	0.999788	9	11	ATP metabolic process	BP	0.0496374	down-regulated
GO:0009735	0.00208334	0.999366	17	32	response to cytokinin	BP	0.0496374	down-regulated

## Sheet: Table S5
Table S5. Main effect heat DEGs due to heat 0v8 hr, 0v16hr, 0v24, including only mock
GeneID	baseMean	log2FoldChange	log2FoldChange SE	stat	p-value	p-adjusted	timepoint comparison
TraesCS1A02G001800	1179.79	-0.661054	0.191425	-3.45334	0.000553685	0.00487384	0v8
TraesCS1A02G005900	333.895	-0.750548	0.206021	-3.64306	0.000269418	0.00269095	0v8
TraesCS1A02G008100	280.024	0.596958	0.182861	3.26454	0.00109641	0.00851571	0v8
TraesCS1A02G011800	545.03	0.623011	0.198522	3.13825	0.0016996	0.0121551	0v8
TraesCS1A02G013200	46.1694	-1.76324	0.403881	-4.36573	1.26700075904439e-05	0.000209526	0v8
TraesCS1A02G016203	19.9015	2.07315	0.552862	3.74986	0.000176936	0.0019082	0v8
TraesCS1A02G018400	85.0109	-2.08785	0.304894	-6.84778	7.50058486463736e-12	5.81138788435566e-10	0v8
TraesCS1A02G019000	1471.33	-0.435315	0.163082	-2.6693	0.00760099	0.0395288	0v8
TraesCS1A02G024300	210.365	0.772439	0.196672	3.92755	8.58150890456296e-05	0.00105057	0v8
TraesCS1A02G024400	62.8494	-1.07113	0.319447	-3.35307	0.000799198	0.00656611	0v8
TraesCS1A02G025200	413.866	-0.933647	0.21407	-4.36141	1.29227035230269e-05	0.000212774	0v8
TraesCS1A02G028700	162.598	-0.704445	0.248103	-2.83932	0.00452091	0.0263171	0v8
TraesCS1A02G030100	700.683	-0.68009	0.166492	-4.08483	4.41082767398389e-05	0.000602845	0v8
TraesCS1A02G035000	632.241	-0.785766	0.228427	-3.4399	0.000581919	0.0050837	0v8
TraesCS1A02G035800	5443.33	-0.584672	0.162246	-3.60363	0.000313808	0.00305557	0v8
TraesCS1A02G036300	629.48	0.517046	0.156326	3.30748	0.000941404	0.00750925	0v8
TraesCS1A02G036700	19.9393	-2.0973	0.597996	-3.50721	0.000452828	0.00412632	0v8
TraesCS1A02G037300	22.7993	-3.58576	0.726788	-4.93371	8.06835870769811e-07	1.96109879502241e-05	0v8
TraesCS1A02G039100	184.463	0.669487	0.19784	3.38398	0.000714423	0.0060009	0v8
TraesCS1A02G040400	373.473	-0.559867	0.205543	-2.72384	0.00645285	0.0347861	0v8
TraesCS1A02G040600	1066.92	-0.44826	0.145904	-3.07229	0.00212423	0.0144884	0v8
TraesCS1A02G041500	67.1822	1.50781	0.373352	4.03858	5.37748259367666e-05	0.000709647	0v8
TraesCS1A02G042300	209.224	-2.56023	0.309585	-8.26987	1.34106674517021e-16	2.38390378845209e-14	0v8
TraesCS1A02G044500	815.751	-0.49335	0.131916	-3.73989	0.0001841	0.00197196	0v8
TraesCS1A02G056600	118.758	-0.66211	0.243653	-2.71743	0.00657902	0.0353085	0v8
TraesCS1A02G057200	353.165	0.747183	0.226392	3.30039	0.000965493	0.00766939	0v8
TraesCS1A02G058300	306.242	-0.494824	0.191637	-2.58209	0.00982046	0.0480192	0v8
TraesCS1A02G058600	992.649	0.358478	0.117587	3.04863	0.00229885	0.0154231	0v8
TraesCS1A02G059100	1128.75	-0.599694	0.149613	-4.00831	6.115445584402e-05	0.000790422	0v8
TraesCS1A02G059700	17.0508	2.44953	0.658548	3.71959	0.000199544	0.00211107	0v8
TraesCS1A02G061000	39.9274	1.3871	0.420673	3.29734	0.000976068	0.00773786	0v8
TraesCS1A02G062100	1263.29	-0.636169	0.155625	-4.08783	4.35435809941889e-05	0.000595845	0v8
TraesCS1A02G063300	149.004	0.613648	0.237224	2.58679	0.00968741	0.0475655	0v8
TraesCS1A02G064000	455.826	-0.618984	0.193503	-3.19883	0.00137985	0.0102456	0v8
TraesCS1A02G064100	1149.8	-0.516429	0.13754	-3.75475	0.000173512	0.00187914	0v8
TraesCS1A02G065200	53.4053	1.13262	0.34205	3.31126	0.000928774	0.0074336	0v8
TraesCS1A02G065400	96.811	-0.826782	0.28272	-2.92439	0.00345137	0.021234	0v8
TraesCS1A02G065600	342.132	0.562311	0.171623	3.27644	0.00105126	0.00822758	0v8
TraesCS1A02G066000	321.918	0.508731	0.160765	3.16443	0.00155386	0.0112792	0v8
TraesCS1A02G067300	1019.84	-0.46156	0.122147	-3.77872	0.000157635	0.00173402	0v8
TraesCS1A02G068000	686.553	-0.703545	0.193078	-3.64383	0.000268607	0.00268417	0v8
TraesCS1A02G072000	812.52	-0.634193	0.164484	-3.85566	0.000115419	0.00133788	0v8
TraesCS1A02G072700	84.4492	1.06707	0.263036	4.05674	4.97632135741049e-05	0.000664126	0v8
TraesCS1A02G075000	1869.21	-0.675534	0.144424	-4.67743	2.90490488779864e-06	5.8914712649324e-05	0v8
TraesCS1A02G075700	520.408	-0.65127	0.168669	-3.86123	0.000112817	0.00131282	0v8
TraesCS1A02G077700	758.198	-1.05709	0.194637	-5.43106	5.60196204136991e-08	1.85335390617224e-06	0v8
TraesCS1A02G078700	182.546	-0.675289	0.198009	-3.41041	0.000648663	0.00555873	0v8
TraesCS1A02G078800	259.45	-1.45715	0.191372	-7.61422	2.65286254128567e-14	3.22818075678424e-12	0v8
TraesCS1A02G078900	25.441	-2.44492	0.593169	-4.12179	3.75935089718687e-05	0.000525975	0v8
TraesCS1A02G083100	71.1209	-1.17772	0.309892	-3.80044	0.00014444	0.00161547	0v8
TraesCS1A02G085600	1062.36	-0.538821	0.168057	-3.20619	0.00134507	0.0100412	0v8
TraesCS1A02G087200	106.861	0.943156	0.317764	2.9681	0.00299651	0.0189791	0v8
TraesCS1A02G087500	112.624	-0.769607	0.253494	-3.03599	0.00239747	0.0159436	0v8
TraesCS1A02G090000	1054.77	-0.467247	0.132437	-3.52808	0.000418579	0.00387253	0v8
TraesCS1A02G092200	16.1427	-1.97121	0.667266	-2.95416	0.00313517	0.0196836	0v8
TraesCS1A02G093800	2348.99	-0.620807	0.146825	-4.22821	2.35557614151435e-05	0.000355253	0v8
TraesCS1A02G093900	2215.19	-0.548936	0.104372	-5.25942	1.44509665077981e-07	4.30160895953384e-06	0v8
TraesCS1A02G095000	1779.17	-0.416447	0.152821	-2.72506	0.00642893	0.0346822	0v8
TraesCS1A02G096600	256.129	-0.900433	0.287828	-3.12837	0.00175776	0.0124688	0v8
TraesCS1A02G097700	2335.48	-0.840417	0.149909	-5.60619	2.06832000929826e-08	7.54251797088536e-07	0v8
TraesCS1A02G099400	872.711	-0.327235	0.125671	-2.6039	0.00921701	0.0458393	0v8
TraesCS1A02G100100	8.26505	-3.20114	0.969761	-3.30095	0.000963575	0.00765916	0v8
TraesCS1A02G100600	535.413	-0.873664	0.17733	-4.92678	8.35965614045596e-07	2.02150388529081e-05	0v8
TraesCS1A02G102600	2010.44	-0.544456	0.132007	-4.12444	3.71641087106358e-05	0.000520867	0v8
TraesCS1A02G102800	15.3164	-1.81797	0.677999	-2.68138	0.00733194	0.0384505	0v8
TraesCS1A02G103100	351.166	0.719381	0.196386	3.66309	0.000249191	0.00252739	0v8
TraesCS1A02G104700	539.311	-0.414935	0.144018	-2.88114	0.00396237	0.023695	0v8
TraesCS1A02G106000	923.932	-0.581051	0.17402	-3.33899	0.000840824	0.0068466	0v8
TraesCS1A02G106500	233.091	-0.555462	0.18339	-3.02885	0.00245483	0.016228	0v8
TraesCS1A02G106700	384.869	-1.25719	0.245134	-5.12858	2.91941907625629e-07	7.99365418339879e-06	0v8
TraesCS1A02G107800	1431.92	-0.38878	0.130595	-2.977	0.00291085	0.0185491	0v8
TraesCS1A02G108000	95.71	1.15051	0.260937	4.40916	1.0377392989535e-05	0.000176309	0v8
TraesCS1A02G108300	530.394	0.394971	0.142229	2.77701	0.00548622	0.0307079	0v8
TraesCS1A02G109300	896.366	-0.482889	0.155498	-3.10543	0.00190003	0.013259	0v8
TraesCS1A02G109400	330.377	0.467534	0.1607	2.90936	0.00362171	0.0220594	0v8
TraesCS1A02G109500	222.098	-0.474902	0.184047	-2.58033	0.00987057	0.048206	0v8
TraesCS1A02G110200	726.405	-0.493387	0.173773	-2.83926	0.00452181	0.0263177	0v8
TraesCS1A02G111300	600.106	0.572189	0.132232	4.32716	1.51041776058369e-05	0.000243116	0v8
TraesCS1A02G111800	182.987	-0.613904	0.232812	-2.63691	0.00836645	0.0425687	0v8
TraesCS1A02G112000	273.786	-0.530578	0.188006	-2.82213	0.00477061	0.0274545	0v8
TraesCS1A02G113300	59.9694	1.80094	0.3257	5.52945	3.21234835184509e-08	1.12374722788234e-06	0v8
TraesCS1A02G113900	268.074	-0.495268	0.176802	-2.80126	0.00509034	0.0289029	0v8
TraesCS1A02G114100	165.832	-0.911137	0.239862	-3.79858	0.000145525	0.00162284	0v8
TraesCS1A02G115400	867.9	-0.5838	0.216731	-2.69366	0.00706719	0.0373708	0v8
TraesCS1A02G115900	9.89701	-2.64253	0.88508	-2.98564	0.00282983	0.0181525	0v8
TraesCS1A02G116700	885.051	-0.535155	0.190382	-2.81095	0.00493948	0.0281987	0v8
TraesCS1A02G118100	673.823	-0.951021	0.164427	-5.78384	7.3013848814009e-09	2.955262891397e-07	0v8
TraesCS1A02G118400	1095.14	-0.411199	0.153088	-2.68603	0.00723074	0.0380394	0v8
TraesCS1A02G120100	1572.27	0.517396	0.118562	4.36393	1.27745552138344e-05	0.000210886	0v8
TraesCS1A02G120200	5160.42	-0.31877	0.110054	-2.89648	0.00377372	0.0228064	0v8
TraesCS1A02G121000	2059.83	-0.29798	0.115378	-2.58263	0.00980491	0.0479722	0v8
TraesCS1A02G122500	233.339	-1.40936	0.247603	-5.69202	1.25545173134527e-08	4.82001664709987e-07	0v8
TraesCS1A02G122600	57.9156	1.03448	0.318129	3.25177	0.0011469	0.00884002	0v8
TraesCS1A02G123100	677.506	-0.475617	0.177288	-2.68273	0.00730236	0.0383272	0v8
TraesCS1A02G124600	4446	-0.523335	0.120425	-4.34573	1.38811668181505e-05	0.000226126	0v8
TraesCS1A02G126100	99.6982	-1.10818	0.280667	-3.94837	7.8683781781996e-05	0.000974414	0v8
TraesCS1A02G126900	830.684	-0.590443	0.124827	-4.73009	2.24417852188072e-06	4.70108560257731e-05	0v8
TraesCS1A02G127800	465.093	0.669334	0.150956	4.43395	9.25200078978937e-06	0.000160393	0v8
TraesCS1A02G130700	1598.95	0.522807	0.152716	3.4234	0.000618429	0.00534664	0v8
TraesCS1A02G131000	817.181	0.47482	0.175113	2.71151	0.00669769	0.0358369	0v8
TraesCS1A02G131200	669.896	-0.377218	0.128899	-2.92646	0.0034284	0.0211041	0v8
TraesCS1A02G131500	1643.46	-0.520989	0.110729	-4.70509	2.53752904103814e-06	5.22108569670207e-05	0v8
TraesCS1A02G131600	176.703	0.544799	0.210927	2.58288	0.00979802	0.047955	0v8
TraesCS1A02G132400	12426.9	0.367199	0.111533	3.29227	0.000993806	0.00785323	0v8
TraesCS1A02G133100	2006.26	-0.673588	0.106903	-6.30095	2.95827568479608e-10	1.61922761565682e-08	0v8
TraesCS1A02G135600	118.355	1.00649	0.343339	2.93149	0.00337338	0.0208537	0v8
TraesCS1A02G139100	707.76	-0.360544	0.129949	-2.77451	0.00552841	0.0308831	0v8
TraesCS1A02G139200	705.409	-0.658299	0.132856	-4.95499	7.2334723629383e-07	1.78030071099297e-05	0v8
TraesCS1A02G140600	83.6512	0.785363	0.293936	2.67188	0.00754273	0.0393051	0v8
TraesCS1A02G142900	1520.79	-0.303684	0.115531	-2.62859	0.00857386	0.0433603	0v8
TraesCS1A02G143000	487.802	-0.554724	0.141734	-3.91383	9.08435402836497e-05	0.00109978	0v8
TraesCS1A02G143300	198.056	-1.08331	0.23774	-4.55669	5.19655980349488e-06	9.67737669021282e-05	0v8
TraesCS1A02G143400	1173.82	0.623185	0.194936	3.19687	0.00138927	0.0103021	0v8
TraesCS1A02G143600	431.343	0.505837	0.147195	3.43651	0.000589261	0.00513913	0v8
TraesCS1A02G143700	886.662	0.662363	0.152988	4.32952	1.49433659360887e-05	0.00024083	0v8
TraesCS1A02G143900	1029.37	-0.402222	0.134972	-2.98003	0.0028822	0.018408	0v8
TraesCS1A02G147300	49.1328	-1.31817	0.340031	-3.87661	0.000105924	0.0012459	0v8
TraesCS1A02G149200	1367.29	-0.317586	0.120902	-2.62681	0.00861891	0.043534	0v8
TraesCS1A02G150200	518.811	0.627242	0.146437	4.28336	1.84090867966321e-05	0.000287895	0v8
TraesCS1A02G150600	2461.7	-0.306841	0.111984	-2.74005	0.006143	0.033485	0v8
TraesCS1A02G153100	834.956	0.736934	0.147734	4.98826	6.09258356675059e-07	1.53208888574793e-05	0v8
TraesCS1A02G155200	6358.89	-0.6048	0.115446	-5.23882	1.6160893297315e-07	4.73846750422723e-06	0v8
TraesCS1A02G158700	2512.87	-0.457983	0.123663	-3.70347	0.000212673	0.00222199	0v8
TraesCS1A02G160900	278.114	1.51103	0.528626	2.85841	0.00425763	0.025097	0v8
TraesCS1A02G161900	576.33	1.05834	0.139813	7.56968	3.74143901653936e-14	4.4292701643399e-12	0v8
TraesCS1A02G162800	1535.42	-0.348638	0.116368	-2.99599	0.00273554	0.0176878	0v8
TraesCS1A02G165500	1671.22	-0.609027	0.112147	-5.43059	5.61686073253717e-08	1.85719944431051e-06	0v8
TraesCS1A02G165800	1235.08	-0.376369	0.117148	-3.21277	0.0013146	0.00985143	0v8
TraesCS1A02G166000	10.2921	-3.01379	0.858461	-3.51069	0.000446944	0.00408057	0v8
TraesCS1A02G168500	25.2611	-2.64291	0.600163	-4.40365	1.06444001587482e-05	0.000179965	0v8
TraesCS1A02G170100	2509.93	0.450624	0.14186	3.17655	0.00149039	0.0108853	0v8
TraesCS1A02G171000	1776.03	-0.388921	0.120173	-3.23634	0.00121071	0.00922407	0v8
TraesCS1A02G171500	107.451	0.650324	0.250164	2.59958	0.00933367	0.0462559	0v8
TraesCS1A02G171700	310.59	0.537717	0.164684	3.26515	0.00109408	0.00850221	0v8
TraesCS1A02G171800	55.6094	-3.20972	0.465626	-6.89334	5.44959514085827e-12	4.35246115573957e-10	0v8
TraesCS1A02G172600	16.8593	-2.25919	0.784397	-2.88016	0.00397471	0.0237533	0v8
TraesCS1A02G173200	235.921	-0.846701	0.17387	-4.86973	1.11750047493759e-06	2.59708942343488e-05	0v8
TraesCS1A02G174000	1467.61	-0.490567	0.116925	-4.19557	2.72181607465277e-05	0.000401517	0v8
TraesCS1A02G177400	497.846	0.442755	0.148096	2.98965	0.002793	0.0179773	0v8
TraesCS1A02G179600	722.902	0.376094	0.126604	2.97065	0.00297174	0.0188623	0v8
TraesCS1A02G180100	713.781	0.397091	0.133685	2.97036	0.00297454	0.0188737	0v8
TraesCS1A02G182400	1969.56	-0.677996	0.112288	-6.03802	1.56013554995478e-09	7.20431974720974e-08	0v8
TraesCS1A02G185100	78.761	-1.13333	0.297456	-3.81006	0.00013893	0.00156251	0v8
TraesCS1A02G185400	28.8785	-1.56314	0.441348	-3.54173	0.000397505	0.00371533	0v8
TraesCS1A02G186200	27.1938	-1.45565	0.554386	-2.6257	0.00864711	0.0436481	0v8
TraesCS1A02G187400	445.951	0.92743	0.240954	3.849	0.000118602	0.00136835	0v8
TraesCS1A02G188400	24.9776	-1.43894	0.48278	-2.98053	0.00287747	0.0183874	0v8
TraesCS1A02G189600	308.68	-0.414311	0.157466	-2.63112	0.00851038	0.0431346	0v8
TraesCS1A02G190000	45.2004	1.05469	0.374392	2.81708	0.00484624	0.0278008	0v8
TraesCS1A02G190400	4251.32	0.391637	0.125929	3.10999	0.00187096	0.0131028	0v8
TraesCS1A02G193500	292.485	-0.622966	0.169285	-3.67998	0.000233255	0.00239532	0v8
TraesCS1A02G195500	251.607	-0.781329	0.193693	-4.03385	5.48697128865991e-05	0.000721629	0v8
TraesCS1A02G196500	27.7466	-1.24765	0.436452	-2.85862	0.00425483	0.0250857	0v8
TraesCS1A02G196600	776.308	-0.454745	0.140573	-3.23495	0.00121666	0.00926515	0v8
TraesCS1A02G200600	57.6998	1.05263	0.328562	3.20374	0.00135655	0.0101071	0v8
TraesCS1A02G201600	3878.22	-0.562382	0.126338	-4.4514	8.53140377751875e-06	0.000149056	0v8
TraesCS1A02G202300	276.892	-0.517415	0.167882	-3.08201	0.00205605	0.014115	0v8
TraesCS1A02G203900	730.533	-0.806732	0.16653	-4.84437	1.27012309879221e-06	2.90183724577402e-05	0v8
TraesCS1A02G205100	478.564	1.77095	0.551536	3.21094	0.00132303	0.00990935	0v8
TraesCS1A02G205400	355.593	-0.550253	0.157455	-3.49468	0.000474639	0.00428649	0v8
TraesCS1A02G206000	208.321	0.572857	0.182945	3.13131	0.00174031	0.0123867	0v8
TraesCS1A02G208500	774.165	-0.515986	0.124567	-4.14223	3.4394224417554e-05	0.000488689	0v8
TraesCS1A02G209700	15.8854	-2.39448	0.660066	-3.62764	0.000286019	0.00283054	0v8
TraesCS1A02G213400	200.75	-0.869413	0.195553	-4.44593	8.7513504164369e-06	0.000152553	0v8
TraesCS1A02G214100	111.192	0.772252	0.25366	3.04444	0.00233115	0.0155848	0v8
TraesCS1A02G215300	127.722	-0.697387	0.259729	-2.68506	0.0072517	0.0381148	0v8
TraesCS1A02G217000	32.5011	-1.19508	0.419359	-2.84977	0.00437506	0.0256358	0v8
TraesCS1A02G217400	1580.3	0.479936	0.124336	3.86	0.000113387	0.0013181	0v8
TraesCS1A02G217600	126.926	0.614662	0.230863	2.66246	0.00775722	0.0401278	0v8
TraesCS1A02G217900	1319.4	0.594231	0.151698	3.91719	8.95864155136345e-05	0.00108828	0v8
TraesCS1A02G218800	444.152	-0.419393	0.152954	-2.74196	0.00610737	0.0333678	0v8
TraesCS1A02G221000	929.309	-0.775465	0.128293	-6.04447	1.49905601849963e-09	6.95625782201637e-08	0v8
TraesCS1A02G221200	127.153	-1.06616	0.237862	-4.48226	7.38552149339168e-06	0.000131327	0v8
TraesCS1A02G221600	838.251	-0.804955	0.14998	-5.36708	8.00211113924599e-08	2.5607658818402e-06	0v8
TraesCS1A02G222700	22.1414	-1.64401	0.535884	-3.06785	0.00215608	0.0146475	0v8
TraesCS1A02G224700	633.468	-0.36467	0.135246	-2.69634	0.00701065	0.0371487	0v8
TraesCS1A02G225100	486.416	0.504393	0.167858	3.00487	0.00265694	0.0172681	0v8
TraesCS1A02G227400	87.8116	0.739352	0.280334	2.6374	0.00835446	0.0425153	0v8
TraesCS1A02G228800	1460.39	0.504351	0.133447	3.7794	0.000157208	0.00173032	0v8
TraesCS1A02G229900	203.518	1.70773	0.201341	8.48177	2.2178963941605e-17	4.44410010343695e-15	0v8
TraesCS1A02G230300	476.911	-0.61821	0.217471	-2.84272	0.00447301	0.0261007	0v8
TraesCS1A02G230400	1626.66	-0.509112	0.137428	-3.70458	0.00021174	0.00221367	0v8
TraesCS1A02G231200	325.492	1.50808	0.585361	2.57632	0.00998589	0.048606	0v8
TraesCS1A02G232800	323.751	0.835904	0.158235	5.28266	1.2732037603672e-07	3.8753780158552e-06	0v8
TraesCS1A02G233700	1056.99	-0.427512	0.132422	-3.22839	0.00124487	0.00943111	0v8
TraesCS1A02G235000	13.7686	-2.30916	0.696772	-3.31408	0.000919456	0.00737777	0v8
TraesCS1A02G236000	738.202	-0.404065	0.136796	-2.95377	0.00313915	0.0196978	0v8
TraesCS1A02G237200	188.945	0.670242	0.211119	3.17472	0.00149983	0.010943	0v8
TraesCS1A02G238700	302.899	-0.414692	0.156842	-2.64402	0.00819287	0.0418923	0v8
TraesCS1A02G239700	160.167	-1.18102	0.204829	-5.76587	8.12366219658911e-09	3.26015844670759e-07	0v8
TraesCS1A02G241800	47.9704	-1.48232	0.346074	-4.28326	1.8417754836879e-05	0.000287951	0v8
TraesCS1A02G241900	750.33	-0.599722	0.131267	-4.56871	4.90741184988566e-06	9.22678038327639e-05	0v8
TraesCS1A02G242500	430.32	-0.619009	0.188497	-3.28393	0.00102372	0.00804922	0v8
TraesCS1A02G242600	851.764	-0.631046	0.122813	-5.13828	2.772697055408e-07	7.63167010782193e-06	0v8
TraesCS1A02G243300	932.442	0.383194	0.121556	3.1524	0.00161936	0.0116724	0v8
TraesCS1A02G244300	456.795	-0.43305	0.150607	-2.87537	0.00403555	0.0240327	0v8
TraesCS1A02G244400	270.41	0.547128	0.20755	2.63612	0.00838591	0.0426418	0v8
TraesCS1A02G246400	340.866	-0.48785	0.163317	-2.98714	0.00281601	0.0180925	0v8
TraesCS1A02G246700	46.6572	1.09691	0.364371	3.01041	0.00260893	0.0170224	0v8
TraesCS1A02G247500	2177.4	0.318974	0.104851	3.04216	0.00234887	0.0156783	0v8
TraesCS1A02G248100	503.476	0.463085	0.139165	3.32759	0.000875999	0.00709229	0v8
TraesCS1A02G248300	79.7853	-1.40152	0.337511	-4.1525	3.28862488157409e-05	0.00047009	0v8
TraesCS1A02G249400	1025.99	0.40121	0.124795	3.21496	0.00130462	0.00978759	0v8
TraesCS1A02G250700	261.514	0.836604	0.183667	4.55499	5.23878089525632e-06	9.74640122855659e-05	0v8
TraesCS1A02G251400	382.533	-0.883265	0.160458	-5.50465	3.6990273005275e-08	1.27434411970664e-06	0v8
TraesCS1A02G253400	432.695	-0.602876	0.228277	-2.64099	0.00826645	0.0421876	0v8
TraesCS1A02G253900	54.1895	0.932951	0.322965	2.88871	0.00386826	0.0232694	0v8
TraesCS1A02G256400	418.139	0.413312	0.148223	2.78844	0.0052962	0.0298604	0v8
TraesCS1A02G257400	262.499	-0.522715	0.186794	-2.79834	0.00513653	0.0291156	0v8
TraesCS1A02G258100	653.583	0.421308	0.147575	2.85488	0.00430536	0.0253178	0v8
TraesCS1A02G259400	49.3314	1.16606	0.341945	3.41007	0.000649464	0.00556238	0v8
TraesCS1A02G260300	290.786	-0.486411	0.16579	-2.93389	0.00334742	0.0207249	0v8
TraesCS1A02G262000	6696.48	0.528236	0.140801	3.75166	0.000175667	0.00189704	0v8
TraesCS1A02G263400	486.972	0.604045	0.156228	3.86643	0.000110441	0.00128914	0v8
TraesCS1A02G264100	624.371	0.349063	0.126968	2.74921	0.00597383	0.0328344	0v8
TraesCS1A02G264900	217.356	0.792699	0.217487	3.64482	0.000267582	0.00267704	0v8
TraesCS1A02G265800	12.4509	-3.03984	0.826392	-3.67845	0.000234659	0.00240581	0v8
TraesCS1A02G266600	246.985	-0.69045	0.199083	-3.46814	0.000524069	0.00465797	0v8
TraesCS1A02G267600	48.4505	-0.989934	0.343339	-2.88326	0.00393587	0.0235803	0v8
TraesCS1A02G268200	841.936	-0.682528	0.123126	-5.54332	2.96788064363874e-08	1.04467187944245e-06	0v8
TraesCS1A02G268500	1091.97	-0.368967	0.122779	-3.00513	0.00265469	0.0172634	0v8
TraesCS1A02G268800	53.1461	-1.1328	0.380043	-2.98072	0.00287573	0.0183804	0v8
TraesCS1A02G270700	850.344	-0.356146	0.132076	-2.69651	0.00700693	0.037148	0v8
TraesCS1A02G273100	607.667	0.451003	0.136244	3.31027	0.000932073	0.00745264	0v8
TraesCS1A02G274400	137.549	-0.845845	0.250942	-3.37068	0.000749836	0.00624287	0v8
TraesCS1A02G275000	91.4974	-0.949276	0.259952	-3.65173	0.000260477	0.00261751	0v8
TraesCS1A02G275300	143.975	0.748096	0.233222	3.20765	0.00133824	0.00999729	0v8
TraesCS1A02G276600	182.241	0.815012	0.213016	3.82606	0.000130211	0.00147911	0v8
TraesCS1A02G277400	137.541	-2.01096	0.658073	-3.05583	0.00224441	0.0151181	0v8
TraesCS1A02G277700	172.635	0.561235	0.203642	2.75599	0.00585156	0.0323584	0v8
TraesCS1A02G279500	666.081	-0.933428	0.145961	-6.39507	1.60475019284054e-10	9.33322712156058e-09	0v8
TraesCS1A02G280200	263.152	0.876323	0.181814	4.81989	1.43639609859825e-06	3.21945759553804e-05	0v8
TraesCS1A02G280500	2192.28	-0.438883	0.133994	-3.2754	0.00105514	0.00825165	0v8
TraesCS1A02G281200	620.543	0.38689	0.142841	2.70853	0.00675812	0.0360955	0v8
TraesCS1A02G281400	1242.72	-0.467632	0.129969	-3.59802	0.000320646	0.0031076	0v8
TraesCS1A02G282000	250.122	0.658286	0.175621	3.74833	0.000178016	0.00191803	0v8
TraesCS1A02G283900	124.92	-2.18809	0.621715	-3.51944	0.000432467	0.0039719	0v8
TraesCS1A02G284900	10.1392	-2.7431	0.836657	-3.27864	0.00104308	0.00817537	0v8
TraesCS1A02G285000	6693.02	1.38546	0.169856	8.15666	3.44412560995519e-16	5.64458343462772e-14	0v8
TraesCS1A02G285200	1105.06	0.448761	0.127011	3.53326	0.000410465	0.00381383	0v8
TraesCS1A02G286200	2230.29	-0.436165	0.104241	-4.18421	2.86159243975681e-05	0.000418652	0v8
TraesCS1A02G286900	2770.24	-0.500431	0.109953	-4.5513	5.33148538880173e-06	9.90587190227363e-05	0v8
TraesCS1A02G288500	632.112	0.642157	0.142161	4.51713	6.26834379258488e-06	0.000114451	0v8
TraesCS1A02G288600	325.375	0.683036	0.212298	3.21734	0.00129385	0.00972545	0v8
TraesCS1A02G288700	96.7988	0.833056	0.260476	3.19821	0.00138284	0.0102625	0v8
TraesCS1A02G289000	437.617	0.478619	0.143442	3.33668	0.000847866	0.00689603	0v8
TraesCS1A02G290800	18.4411	-2.32123	0.665319	-3.48889	0.000485026	0.00436916	0v8
TraesCS1A02G291200	165.92	0.922253	0.202347	4.55779	5.16949355262228e-06	9.64280596694076e-05	0v8
TraesCS1A02G293200	132.009	1.04547	0.240462	4.34775	1.3753827473565e-05	0.000224308	0v8
TraesCS1A02G293900	62.5803	1.52629	0.335722	4.5463	5.45974890889852e-06	0.00010121	0v8
TraesCS1A02G294000	88.8888	1.34431	0.321118	4.18636	2.83465023747348e-05	0.000415461	0v8
TraesCS1A02G294900	165.22	0.659789	0.230755	2.85926	0.00424626	0.025043	0v8
TraesCS1A02G295300	21.3315	-1.86893	0.596499	-3.13317	0.00172932	0.0123272	0v8
TraesCS1A02G295600	253.112	1.77557	0.213469	8.31773	8.96668056628301e-17	1.65623644362099e-14	0v8
TraesCS1A02G298800	206.934	-0.653154	0.199875	-3.26781	0.00108384	0.00844299	0v8
TraesCS1A02G299100	864.328	-0.457884	0.15857	-2.88759	0.00388206	0.0233269	0v8
TraesCS1A02G299500	9480.47	0.360383	0.123885	2.909	0.00362585	0.0220822	0v8
TraesCS1A02G300200	507.662	-0.828826	0.159431	-5.19866	2.00731110388113e-07	5.75747298175664e-06	0v8
TraesCS1A02G301600	2195.87	0.300251	0.113954	2.63485	0.00841746	0.0427642	0v8
TraesCS1A02G301800	708.579	-0.546528	0.138731	-3.93947	8.16618114470173e-05	0.00100668	0v8
TraesCS1A02G304200	95.7907	1.15982	0.252753	4.58875	4.45911794720499e-06	8.47381844216509e-05	0v8
TraesCS1A02G304400	459.638	0.442792	0.159289	2.77981	0.005439	0.0305109	0v8
TraesCS1A02G306100	180.9	0.618123	0.201744	3.0639	0.00218474	0.0147908	0v8
TraesCS1A02G306200	4139.75	-0.514962	0.108216	-4.75863	1.9491097111837e-06	4.18404806016384e-05	0v8
TraesCS1A02G306300	469.953	0.571509	0.143213	3.99062	6.59011767904855e-05	0.000839396	0v8
TraesCS1A02G306500	565.186	0.428497	0.138367	3.09681	0.00195613	0.0135704	0v8
TraesCS1A02G306600	83.3379	1.21512	0.291234	4.17231	3.01533073941993e-05	0.000437644	0v8
TraesCS1A02G309800	893.83	0.617728	0.144277	4.28153	1.85612113357956e-05	0.000289874	0v8
TraesCS1A02G310500	512.445	-0.643763	0.149357	-4.31022	1.63093846934268e-05	0.000258914	0v8
TraesCS1A02G311000	1377.75	-0.339507	0.111787	-3.0371	0.00238868	0.0158963	0v8
TraesCS1A02G311100	30.9886	-3.84912	0.619307	-6.21521	5.12575625051809e-10	2.66173199580475e-08	0v8
TraesCS1A02G313500	390.229	0.496334	0.154363	3.21538	0.00130273	0.00977666	0v8
TraesCS1A02G320200	129.136	-0.818842	0.302876	-2.70356	0.00686017	0.036542	0v8
TraesCS1A02G320500	1067.55	-0.642425	0.143686	-4.47105	7.78379362051723e-06	0.000137247	0v8
TraesCS1A02G320900	282.917	-0.869336	0.170486	-5.09916	3.41166483067554e-07	9.21685878457775e-06	0v8
TraesCS1A02G321600	32.5984	2.11956	0.457919	4.62867	3.6802150733963e-06	7.1962164121383e-05	0v8
TraesCS1A02G321700	137.485	-0.570765	0.214835	-2.65676	0.00788945	0.0406634	0v8
TraesCS1A02G321900	366.793	-0.602837	0.153872	-3.91778	8.93690257541076e-05	0.00108587	0v8
TraesCS1A02G323300	176.463	0.61183	0.206152	2.96785	0.00299889	0.0189878	0v8
TraesCS1A02G328000	94.1853	0.811526	0.263462	3.08024	0.00206831	0.0141803	0v8
TraesCS1A02G328700	812.669	0.34468	0.125267	2.75158	0.00593094	0.0326538	0v8
TraesCS1A02G329400	460.759	0.656456	0.182874	3.58966	0.000331106	0.00319586	0v8
TraesCS1A02G330200	319.705	-0.401552	0.155906	-2.57561	0.0100064	0.0486639	0v8
TraesCS1A02G332200	37.2821	-1.09441	0.402149	-2.7214	0.00650066	0.034984	0v8
TraesCS1A02G333000	692.353	0.378475	0.133252	2.8403	0.00450714	0.026262	0v8
TraesCS1A02G333600	1375.18	0.397628	0.135659	2.93108	0.00337781	0.0208674	0v8
TraesCS1A02G333700	821.551	-0.634732	0.124572	-5.09529	3.48200479280951e-07	9.37117056388496e-06	0v8
TraesCS1A02G336300	117.283	1.18216	0.260776	4.53325	5.80829761263692e-06	0.000106937	0v8
TraesCS1A02G337400	9.64599	-3.81079	1.04814	-3.63575	0.000277169	0.00275787	0v8
TraesCS1A02G337800	1166.13	-0.429211	0.117393	-3.6562	0.000255986	0.00258152	0v8
TraesCS1A02G339500	1432.27	0.511121	0.119337	4.28299	1.8439720934744e-05	0.000288215	0v8
TraesCS1A02G339900	1069.09	-0.424912	0.128397	-3.30936	0.000935111	0.0074664	0v8
TraesCS1A02G340100	36.4419	1.47092	0.459687	3.19984	0.00137505	0.0102166	0v8
TraesCS1A02G341300	6288.34	-0.905166	0.131387	-6.8893	5.60656692803272e-12	4.45274487704515e-10	0v8
TraesCS1A02G341700	516.545	0.586799	0.162367	3.61403	0.000301475	0.00295331	0v8
TraesCS1A02G341900	173.003	0.574782	0.213168	2.69638	0.00700967	0.0371486	0v8
TraesCS1A02G342900	341.527	0.608082	0.1917	3.17205	0.00151369	0.01103	0v8
TraesCS1A02G343800	125.686	0.750967	0.234933	3.19652	0.00139096	0.0103092	0v8
TraesCS1A02G345800	48.0299	1.0825	0.34248	3.16077	0.0015735	0.0113941	0v8
TraesCS1A02G348000	1000.37	1.03714	0.166552	6.22711	4.75128464404462e-10	2.48548290613648e-08	0v8
TraesCS1A02G351100	98.8846	1.16856	0.268653	4.34969	1.36331063880853e-05	0.000222763	0v8
TraesCS1A02G352700	107.847	0.637996	0.232665	2.74212	0.00610442	0.0333646	0v8
TraesCS1A02G354300	23.0378	-2.43409	0.537891	-4.52525	6.03247382826966e-06	0.00011049	0v8
TraesCS1A02G360200	22864.6	0.421024	0.116438	3.61587	0.000299342	0.00293575	0v8
TraesCS1A02G360500	3032.2	-0.469141	0.104056	-4.50855	6.52714929234636e-06	0.000118026	0v8
TraesCS1A02G361400	962.978	0.463045	0.156448	2.95974	0.00307902	0.0193999	0v8
TraesCS1A02G361700	19313.2	0.357713	0.122504	2.92002	0.00350005	0.0214776	0v8
TraesCS1A02G361900	3489.11	-0.800607	0.134811	-5.93873	2.87245298542855e-09	1.25489459931981e-07	0v8
TraesCS1A02G362400	66.1589	1.13235	0.323057	3.5051	0.000456431	0.00415447	0v8
TraesCS1A02G362500	293.323	-1.08007	0.169862	-6.3585	2.0373280997352e-10	1.15760247719023e-08	0v8
TraesCS1A02G365200	3553.17	0.732599	0.154034	4.75609	1.97380482828212e-06	4.22843130308145e-05	0v8
TraesCS1A02G366400	619.308	-0.503407	0.134726	-3.73653	0.000186575	0.00199509	0v8
TraesCS1A02G367300	550.028	0.459056	0.136637	3.35968	0.000780342	0.00644481	0v8
TraesCS1A02G368500	51.6375	0.989487	0.367172	2.69489	0.00704128	0.0372709	0v8
TraesCS1A02G371100	272.56	0.591448	0.182859	3.23445	0.00121879	0.00927687	0v8
TraesCS1A02G374600	199.91	0.682642	0.204012	3.34609	0.000819603	0.00670461	0v8
TraesCS1A02G374900	606.447	0.416883	0.130729	3.18891	0.00142812	0.0105337	0v8
TraesCS1A02G375000	87.0155	0.910164	0.274589	3.31464	0.000917598	0.00736599	0v8
TraesCS1A02G376400	610.326	-0.537805	0.135774	-3.96103	7.46265162691559e-05	0.000932519	0v8
TraesCS1A02G379000	8717.71	-0.414359	0.101667	-4.07566	4.58836229437258e-05	0.000622459	0v8
TraesCS1A02G379400	108.202	-0.734647	0.260874	-2.8161	0.00486109	0.0278658	0v8
TraesCS1A02G380700	695.65	0.669955	0.131835	5.08177	3.73940228311805e-07	1.00125913969431e-05	0v8
TraesCS1A02G381500	56.2555	-1.45512	0.358188	-4.06244	4.85622169978903e-05	0.000651826	0v8
TraesCS1A02G385600	278.092	-1.52698	0.225234	-6.77952	1.20574867440647e-11	8.91436562332375e-10	0v8
TraesCS1A02G385900	4097.66	-0.578608	0.106396	-5.43824	5.38099226468049e-08	1.78650203372934e-06	0v8
TraesCS1A02G387400	101.665	-0.974822	0.253443	-3.84632	0.000119908	0.0013792	0v8
TraesCS1A02G389100	280.402	-0.526602	0.183088	-2.87622	0.00402472	0.0239859	0v8
TraesCS1A02G392100	51.3955	-2.08405	0.455455	-4.57575	4.74506620345486e-06	8.96314870530017e-05	0v8
TraesCS1A02G392400	911.215	-0.514703	0.122316	-4.20798	2.57664629921907e-05	0.000382791	0v8
TraesCS1A02G395600	793.488	0.452667	0.140612	3.21927	0.00128517	0.00966796	0v8
TraesCS1A02G398500	247.796	0.636693	0.196207	3.24501	0.00117447	0.00901335	0v8
TraesCS1A02G402000	37.3533	1.42837	0.394717	3.61872	0.000296064	0.00290862	0v8
TraesCS1A02G402400	154.165	0.883772	0.237166	3.72638	0.00019425	0.00206199	0v8
TraesCS1A02G402500	341.56	-0.644423	0.157924	-4.0806	4.49189259387478e-05	0.000612154	0v8
TraesCS1A02G403200	635.431	-0.362181	0.13468	-2.68919	0.00716253	0.0377646	0v8
TraesCS1A02G404300	1146.4	0.745212	0.208041	3.58205	0.000340909	0.00327654	0v8
TraesCS1A02G408700	567.157	0.515684	0.14493	3.55817	0.000373452	0.00353538	0v8
TraesCS1A02G411900	7921.71	-0.289675	0.107279	-2.7002	0.00692981	0.0368287	0v8
TraesCS1A02G412900	4543.43	-0.465659	0.120456	-3.86581	0.000110723	0.00129217	0v8
TraesCS1A02G413700	670.528	-1.07988	0.191456	-5.64039	1.69669668336504e-08	6.34231259900449e-07	0v8
TraesCS1A02G414300	32.601	1.16391	0.441089	2.63871	0.00832224	0.0423856	0v8
TraesCS1A02G416500	202.702	0.724524	0.220802	3.28133	0.00103319	0.0081136	0v8
TraesCS1A02G418300	796.694	-0.664046	0.132247	-5.02127	5.13298853261271e-07	1.32064994433002e-05	0v8
TraesCS1A02G419400	577.115	0.579741	0.134191	4.32027	1.55840178716455e-05	0.000248932	0v8
TraesCS1A02G420000	632.168	0.463385	0.151638	3.05587	0.00224407	0.0151181	0v8
TraesCS1A02G423400	59.8819	0.951414	0.334395	2.84518	0.0044387	0.0259458	0v8
TraesCS1A02G424300	595.061	-0.425325	0.140557	-3.02599	0.00247818	0.0163461	0v8
TraesCS1A02G425000	1773.15	-0.406112	0.110088	-3.68897	0.000225164	0.00232996	0v8
TraesCS1A02G425100	325.293	0.643401	0.163413	3.93726	8.24156097523075e-05	0.00101487	0v8
TraesCS1A02G427600	192.021	-0.550581	0.194426	-2.83183	0.0046283	0.0267973	0v8
TraesCS1A02G433100	372.42	0.515703	0.153524	3.35911	0.000781942	0.0064552	0v8
TraesCS1A02G434300	77.258	1.78287	0.326945	5.45312	4.94945480463837e-08	1.66073245060251e-06	0v8
TraesCS1A02G436500	44.4581	-1.27518	0.3901	-3.26886	0.00107981	0.00841557	0v8
TraesCS1A02G437300	23.5713	-1.63857	0.554728	-2.95382	0.00313864	0.0196967	0v8
TraesCS1A02G437500	650.41	-0.389169	0.150634	-2.58355	0.00977905	0.0479035	0v8
TraesCS1A02G437600	403.261	0.509984	0.191806	2.65886	0.00784059	0.0404889	0v8
TraesCS1A02G439500	1221.93	0.550579	0.179973	3.05924	0.00221901	0.0149853	0v8
TraesCS1A02G443000	311.779	0.592493	0.158242	3.74421	0.000180959	0.00194456	0v8
TraesCS1A02G443400	2316.67	-0.451723	0.116319	-3.88348	0.000102974	0.00121575	0v8
TraesCS1A02G444200	754.802	-0.555932	0.14327	-3.88029	0.00010433	0.00122844	0v8
TraesCS1A02G444300	1123.96	-0.785154	0.148225	-5.29706	1.17684539789071e-07	3.61311289295022e-06	0v8
TraesCS1A02G445600	1271.04	0.605103	0.199729	3.02962	0.00244862	0.0161987	0v8
TraesCS1B02G001100	2520.56	-0.430205	0.132479	-3.24734	0.0011649	0.00895203	0v8
TraesCS1B02G007700	208.678	0.516547	0.200543	2.57574	0.0100025	0.0486492	0v8
TraesCS1B02G008200	240.114	-0.748278	0.199515	-3.75048	0.000176498	0.00190493	0v8
TraesCS1B02G018900	410.166	-0.410592	0.149445	-2.74744	0.00600621	0.0329612	0v8
TraesCS1B02G022200	25.1503	-2.02872	0.577236	-3.51454	0.000440517	0.00403033	0v8
TraesCS1B02G022800	2404.38	-0.397961	0.112179	-3.54756	0.000388822	0.0036468	0v8
TraesCS1B02G023800	20.9729	2.16353	0.569439	3.7994	0.000145046	0.00161891	0v8
TraesCS1B02G024500	13967.2	-0.304693	0.114078	-2.67093	0.00756421	0.0393845	0v8
TraesCS1B02G036700	22.8316	1.84694	0.496866	3.71718	0.000201461	0.00212698	0v8
TraesCS1B02G037100	385.98	-0.822413	0.17794	-4.62186	3.80305649365298e-06	7.4185112325107e-05	0v8
TraesCS1B02G040800	271.089	0.681335	0.213146	3.19656	0.00139076	0.0103092	0v8
TraesCS1B02G042200	20073.4	-0.448279	0.133902	-3.34781	0.000814524	0.00666885	0v8
TraesCS1B02G042300	19.7034	-1.33278	0.519192	-2.56702	0.0102576	0.0496432	0v8
TraesCS1B02G045700	739.106	-0.394854	0.135316	-2.91802	0.00352258	0.0215854	0v8
TraesCS1B02G047800	11.0536	-3.94348	0.97635	-4.03901	5.3678071320089e-05	0.000708866	0v8
TraesCS1B02G051600	836.691	0.512869	0.126874	4.04237	5.29141758814911e-05	0.000699919	0v8
TraesCS1B02G054200	56.982	-1.77287	0.377841	-4.69211	2.70405039316038e-06	5.52163779598677e-05	0v8
TraesCS1B02G055300	329.927	0.511595	0.160907	3.17944	0.00147561	0.0108011	0v8
TraesCS1B02G059400	474.752	0.811081	0.147018	5.51688	3.45067781110942e-08	1.19678370615762e-06	0v8
TraesCS1B02G060900	383.245	-0.409712	0.145429	-2.81727	0.00484342	0.0277874	0v8
TraesCS1B02G066700	96.8215	0.814314	0.259996	3.13202	0.00173608	0.0123645	0v8
TraesCS1B02G071642	77.1205	0.840762	0.284097	2.95942	0.00308222	0.0194157	0v8
TraesCS1B02G073800	116.054	0.630273	0.230816	2.73062	0.00632148	0.034257	0v8
TraesCS1B02G075900	104.346	0.629449	0.244642	2.57294	0.0100837	0.0489898	0v8
TraesCS1B02G077500	2127.17	-0.532376	0.130922	-4.06636	4.77531979678463e-05	0.000643496	0v8
TraesCS1B02G077600	12.9303	-1.80863	0.703334	-2.57151	0.0101257	0.0491465	0v8
TraesCS1B02G077900	23.7243	1.98639	0.518478	3.8312	0.000127519	0.0014529	0v8
TraesCS1B02G078800	179.846	0.621656	0.201992	3.07763	0.00208656	0.0142813	0v8
TraesCS1B02G079800	255.082	-1.92903	0.267969	-7.19871	6.07848462602593e-13	5.80280385864354e-11	0v8
TraesCS1B02G080400	13.1071	-1.96213	0.687131	-2.85553	0.00429646	0.0252707	0v8
TraesCS1B02G081900	759.904	-0.346309	0.13063	-2.65108	0.0080235	0.0412232	0v8
TraesCS1B02G082100	443.204	-0.572012	0.14798	-3.86546	0.000110878	0.00129318	0v8
TraesCS1B02G083800	222.201	0.967123	0.185485	5.21403	1.84780507042559e-07	5.35146242714779e-06	0v8
TraesCS1B02G084200	341.384	0.485408	0.180007	2.69661	0.00700501	0.0371413	0v8
TraesCS1B02G088600	91.4214	-1.08889	0.312509	-3.48436	0.000493321	0.00442981	0v8
TraesCS1B02G088900	6.77938	-3.69551	1.14676	-3.22256	0.00127052	0.00958187	0v8
TraesCS1B02G089000	101.845	-0.683083	0.25802	-2.6474	0.00811136	0.0415842	0v8
TraesCS1B02G090500	687.742	-0.400487	0.136627	-2.93124	0.00337608	0.0208613	0v8
TraesCS1B02G093600	1567.86	-0.417424	0.1596	-2.61544	0.00891114	0.0446984	0v8
TraesCS1B02G094300	287.912	-0.421155	0.157855	-2.66799	0.00763055	0.0396352	0v8
TraesCS1B02G095600	311.346	-0.713358	0.172264	-4.14107	3.45691232852667e-05	0.000490683	0v8
TraesCS1B02G095700	328.13	0.456195	0.164621	2.77118	0.0055854	0.0311431	0v8
TraesCS1B02G095800	275.357	-0.659478	0.182641	-3.61078	0.000305273	0.00298514	0v8
TraesCS1B02G097200	687.513	-1.64587	0.148276	-11.1	1.25464753592185e-28	7.99393743505441e-26	0v8
TraesCS1B02G097900	1296.04	-0.473149	0.175586	-2.69469	0.00704547	0.0372826	0v8
TraesCS1B02G099900	30.7636	-1.30227	0.460955	-2.82517	0.00472556	0.0272473	0v8
TraesCS1B02G102200	446.863	0.417244	0.14112	2.95667	0.00310982	0.0195592	0v8
TraesCS1B02G102400	31.1928	-1.73858	0.447959	-3.88112	0.000103976	0.00122543	0v8
TraesCS1B02G102500	29.6687	-2.04558	0.574541	-3.56037	0.000370326	0.00350872	0v8
TraesCS1B02G103100	9.9396	-1.98888	0.762433	-2.6086	0.00909129	0.0453533	0v8
TraesCS1B02G106900	482.755	0.52144	0.160496	3.24892	0.00115846	0.00891338	0v8
TraesCS1B02G110400	451.483	-0.440513	0.143581	-3.06805	0.00215458	0.0146398	0v8
TraesCS1B02G113400	1794.79	-0.438005	0.115643	-3.78755	0.000152141	0.00168371	0v8
TraesCS1B02G113700	91.7897	-0.91263	0.332285	-2.74652	0.00602304	0.0330244	0v8
TraesCS1B02G113800	28.1619	-1.60805	0.522817	-3.07575	0.00209975	0.0143491	0v8
TraesCS1B02G114500	318.009	0.534631	0.179122	2.98473	0.00283832	0.0181967	0v8
TraesCS1B02G117800	22.9001	-1.52669	0.525888	-2.90306	0.00369536	0.0224189	0v8
TraesCS1B02G118000	693.007	-0.532239	0.147173	-3.61643	0.000298699	0.00292994	0v8
TraesCS1B02G126100	3351.7	-0.565252	0.118887	-4.75453	1.98907563877186e-06	4.24990667566681e-05	0v8
TraesCS1B02G127900	192.335	0.737755	0.203062	3.63315	0.000279983	0.00277856	0v8
TraesCS1B02G128400	887.443	-0.370427	0.123495	-2.99953	0.00270398	0.0175156	0v8
TraesCS1B02G129200	50.9888	-1.35252	0.418759	-3.22983	0.00123865	0.009394	0v8
TraesCS1B02G129300	760.943	-0.548676	0.12313	-4.45608	8.34735784057735e-06	0.000146139	0v8
TraesCS1B02G129400	848.751	-0.362926	0.134678	-2.69477	0.00704369	0.0372785	0v8
TraesCS1B02G130200	391.42	1.2727	0.168964	7.53234	4.9839461297562e-14	5.76774794355011e-12	0v8
TraesCS1B02G130500	765.845	0.448019	0.154123	2.90689	0.00365047	0.0221964	0v8
TraesCS1B02G133100	544.417	0.377469	0.138394	2.72749	0.00638172	0.034511	0v8
TraesCS1B02G134400	539.786	-0.432723	0.15177	-2.85118	0.00435577	0.0255507	0v8
TraesCS1B02G134500	93.1225	1.29736	0.311206	4.16882	3.06184329428614e-05	0.000442672	0v8
TraesCS1B02G136000	500.564	0.417027	0.135583	3.0758	0.00209935	0.0143481	0v8
TraesCS1B02G136300	126.425	0.697944	0.222712	3.13385	0.00172531	0.0123094	0v8
TraesCS1B02G137100	93.6248	1.18326	0.249515	4.74223	2.1137449463503e-06	4.46746257650913e-05	0v8
TraesCS1B02G137300	160.961	0.690379	0.217476	3.1745	0.00150094	0.0109498	0v8
TraesCS1B02G137700	283.114	-1.34324	0.218197	-6.1561	7.4557540463101e-10	3.7514284733812e-08	0v8
TraesCS1B02G138100	933.059	-0.422821	0.128713	-3.28498	0.00101989	0.00802462	0v8
TraesCS1B02G139500	1227.71	0.639715	0.135618	4.71702	2.39323767767533e-06	4.95657179511532e-05	0v8
TraesCS1B02G140700	779.109	-0.408704	0.12591	-3.24599	0.00117042	0.00898714	0v8
TraesCS1B02G145300	56.3102	-0.896483	0.331671	-2.70293	0.00687308	0.0365958	0v8
TraesCS1B02G146700	202.245	-0.526345	0.184807	-2.84808	0.00439836	0.0257525	0v8
TraesCS1B02G149600	672.963	-0.424596	0.147716	-2.87441	0.0040478	0.0240945	0v8
TraesCS1B02G152100	1754.23	-0.470034	0.11512	-4.08298	4.44620395517168e-05	0.000606949	0v8
TraesCS1B02G153400	467.641	0.582774	0.166657	3.49684	0.000470808	0.00426196	0v8
TraesCS1B02G154000	487.932	-0.390099	0.142146	-2.74435	0.0060631	0.0331899	0v8
TraesCS1B02G154500	8078.97	0.317363	0.111925	2.83549	0.0045755	0.0265512	0v8
TraesCS1B02G154800	484.607	-0.45751	0.137574	-3.32556	0.000882411	0.00713199	0v8
TraesCS1B02G155800	44.3575	-1.77686	0.404632	-4.39129	1.1267787420828e-05	0.000188983	0v8
TraesCS1B02G156600	1513.26	0.57222	0.171152	3.34334	0.000827761	0.00675926	0v8
TraesCS1B02G156800	1495.15	-0.40693	0.115297	-3.52939	0.000416512	0.00385801	0v8
TraesCS1B02G157400	293.896	0.644089	0.171482	3.75601	0.000172643	0.00187115	0v8
TraesCS1B02G157900	51.6483	1.18392	0.368083	3.21645	0.00129787	0.00974922	0v8
TraesCS1B02G159500	262.957	0.595995	0.174755	3.41046	0.000648541	0.00555873	0v8
TraesCS1B02G159900	171.708	-0.620495	0.223266	-2.77918	0.00544966	0.0305606	0v8
TraesCS1B02G162000	183.545	0.56826	0.207351	2.74057	0.00613334	0.0334537	0v8
TraesCS1B02G162700	1125.76	-0.341763	0.112068	-3.04961	0.00229141	0.0153826	0v8
TraesCS1B02G163000	712.522	-0.407605	0.128769	-3.16539	0.00154873	0.0112491	0v8
TraesCS1B02G166300	405.75	-0.652812	0.173121	-3.77085	0.000162692	0.00177895	0v8
TraesCS1B02G166600	66.3254	0.972421	0.319187	3.04655	0.00231483	0.0155031	0v8
TraesCS1B02G166700	401.016	0.421336	0.157961	2.66735	0.00764528	0.03969	0v8
TraesCS1B02G167100	1227.17	-0.493044	0.137926	-3.57469	0.000350644	0.00335475	0v8
TraesCS1B02G167700	180.103	0.683275	0.206434	3.30989	0.000933335	0.00745642	0v8
TraesCS1B02G168000	180.899	0.688954	0.197933	3.48074	0.000500032	0.00447913	0v8
TraesCS1B02G168200	2653.45	-0.394799	0.120066	-3.28818	0.00100836	0.00795052	0v8
TraesCS1B02G168900	221.128	0.636873	0.198463	3.20903	0.00133184	0.0099622	0v8
TraesCS1B02G171800	339.274	0.816549	0.180735	4.51795	6.24425320121791e-06	0.000114102	0v8
TraesCS1B02G172300	704.764	0.71971	0.190149	3.78497	0.000153726	0.00169793	0v8
TraesCS1B02G172400	7713.45	-0.597175	0.104249	-5.72835	1.01409642665361e-08	4.01293454081087e-07	0v8
TraesCS1B02G174700	1924.05	-0.521785	0.112906	-4.62141	3.81144059730022e-06	7.43230916473543e-05	0v8
TraesCS1B02G175500	43.655	1.24846	0.371493	3.36064	0.000777607	0.00642921	0v8
TraesCS1B02G175700	1559.07	-0.38405	0.135733	-2.82945	0.00466279	0.0269584	0v8
TraesCS1B02G176000	31.6368	1.4473	0.447759	3.23231	0.00122793	0.00933019	0v8
TraesCS1B02G177600	186.145	1.22823	0.316347	3.88253	0.000103376	0.00121923	0v8
TraesCS1B02G178500	37.2415	1.60228	0.440438	3.63792	0.000274848	0.00273718	0v8
TraesCS1B02G179900	1259.88	0.39239	0.130379	3.00961	0.00261579	0.0170594	0v8
TraesCS1B02G181200	678.855	0.388456	0.144394	2.69025	0.00713987	0.0376626	0v8
TraesCS1B02G181300	642.921	0.859336	0.228961	3.7532	0.000174593	0.00188808	0v8
TraesCS1B02G184900	24.8584	-2.9212	0.632118	-4.62129	3.81352928457541e-06	7.43382576868797e-05	0v8
TraesCS1B02G185400	106.609	0.7134	0.23993	2.97337	0.00294552	0.0187187	0v8
TraesCS1B02G186300	2991.24	-0.536003	0.136647	-3.92254	8.7621985069863e-05	0.00106877	0v8
TraesCS1B02G187500	107.443	-0.76227	0.239063	-3.18857	0.00142977	0.0105418	0v8
TraesCS1B02G190400	1372.8	-0.348084	0.128396	-2.71101	0.00670791	0.0358733	0v8
TraesCS1B02G191100	209.922	-0.73443	0.183826	-3.99524	6.46279255982837e-05	0.000825403	0v8
TraesCS1B02G192100	145.128	0.728801	0.218368	3.33749	0.000845383	0.00687978	0v8
TraesCS1B02G193000	97.8355	-1.26926	0.267137	-4.75136	2.02052172250955e-06	4.30735732318145e-05	0v8
TraesCS1B02G195800	346.87	-0.800425	0.225471	-3.55001	0.000385219	0.00362019	0v8
TraesCS1B02G196200	1392.93	0.740252	0.158426	4.67253	2.97512612433794e-06	6.01024232300347e-05	0v8
TraesCS1B02G198500	1311.29	-0.642919	0.116573	-5.51517	3.48448260112962e-08	1.20776937884876e-06	0v8
TraesCS1B02G199500	7.83184	-2.73498	0.953785	-2.8675	0.0041373	0.0245382	0v8
TraesCS1B02G201000	80.9301	-0.855947	0.291467	-2.93668	0.00331744	0.0205752	0v8
TraesCS1B02G203800	634.654	-0.715383	0.159978	-4.47175	7.75834832681656e-06	0.000136969	0v8
TraesCS1B02G204600	74.1463	0.730634	0.283697	2.5754	0.0100125	0.0486851	0v8
TraesCS1B02G205400	99.5586	0.904985	0.254718	3.5529	0.000381016	0.00358842	0v8
TraesCS1B02G206000	277.985	0.518075	0.174461	2.96958	0.00298208	0.0189067	0v8
TraesCS1B02G207600	65.1815	1.06337	0.348507	3.05123	0.00227906	0.015316	0v8
TraesCS1B02G207900	113.195	0.734293	0.235072	3.12369	0.00178601	0.0126344	0v8
TraesCS1B02G208500	320.69	-0.642865	0.164266	-3.91356	9.09456187046588e-05	0.00110055	0v8
TraesCS1B02G208900	297.309	0.543009	0.162072	3.35042	0.00080689	0.00661972	0v8
TraesCS1B02G211100	25.6486	-1.36811	0.464413	-2.94588	0.00322036	0.020105	0v8
TraesCS1B02G211200	842.562	-0.517086	0.123574	-4.18443	2.85886424170214e-05	0.000418469	0v8
TraesCS1B02G212800	428.701	0.421294	0.143276	2.94043	0.00327756	0.0203768	0v8
TraesCS1B02G212900	371.441	-0.801768	0.154897	-5.17613	2.26535199473282e-07	6.3909975230507e-06	0v8
TraesCS1B02G213200	478.471	-0.425632	0.151546	-2.8086	0.0049757	0.028357	0v8
TraesCS1B02G213800	20.3627	-2.10361	0.565132	-3.72234	0.000197383	0.00209133	0v8
TraesCS1B02G213900	1265.2	0.493591	0.120512	4.09579	4.20725591111058e-05	0.000578227	0v8
TraesCS1B02G214600	32.2621	1.3753	0.438796	3.13425	0.00172292	0.0122955	0v8
TraesCS1B02G214900	180.5	-1.50399	0.245322	-6.13069	8.74998912338694e-10	4.33529539730217e-08	0v8
TraesCS1B02G215800	3037.04	-0.814773	0.127703	-6.38022	1.76828280104375e-10	1.02006352508634e-08	0v8
TraesCS1B02G216500	287.363	-0.642787	0.176553	-3.64077	0.000271824	0.00271184	0v8
TraesCS1B02G217700	588.95	-0.91511	0.182155	-5.0238	5.06578796453589e-07	1.30710155890278e-05	0v8
TraesCS1B02G218700	338.322	1.53073	0.548498	2.79077	0.00525831	0.029699	0v8
TraesCS1B02G219200	963.766	0.363452	0.12392	2.93297	0.00335741	0.0207707	0v8
TraesCS1B02G222500	622.568	-0.536197	0.144479	-3.71125	0.000206237	0.00216693	0v8
TraesCS1B02G226000	226.466	0.725169	0.213712	3.39321	0.000690795	0.00583441	0v8
TraesCS1B02G226800	137.649	-0.648205	0.210783	-3.07522	0.00210348	0.0143711	0v8
TraesCS1B02G227100	146.439	-0.947556	0.228839	-4.1407	3.46243696631092e-05	0.000491264	0v8
TraesCS1B02G227400	218.399	0.625747	0.179685	3.48247	0.000496816	0.00445696	0v8
TraesCS1B02G227700	37.3459	-1.39804	0.407097	-3.43417	0.000594376	0.00517578	0v8
TraesCS1B02G229000	256.711	0.758216	0.171048	4.43276	9.30358211101865e-06	0.000161139	0v8
TraesCS1B02G229800	265.419	0.509068	0.181397	2.80637	0.00501026	0.0285196	0v8
TraesCS1B02G230100	184.058	-0.974698	0.268189	-3.63437	0.000278656	0.0027683	0v8
TraesCS1B02G230300	6093.37	-0.516157	0.124836	-4.13469	3.55440864909843e-05	0.000501758	0v8
TraesCS1B02G230900	115.192	0.73873	0.225144	3.28114	0.00103387	0.00811554	0v8
TraesCS1B02G232600	127.484	0.754532	0.218619	3.45135	0.000557789	0.00490539	0v8
TraesCS1B02G234800	1357.73	-0.814728	0.119897	-6.79526	1.08117963121472e-11	8.03530434700682e-10	0v8
TraesCS1B02G237100	4211.32	-0.311372	0.111652	-2.78876	0.00529104	0.0298422	0v8
TraesCS1B02G243200	323.955	1.9961	0.520471	3.83517	0.000125476	0.00143078	0v8
TraesCS1B02G243400	293.569	-0.59395	0.166522	-3.56679	0.000361382	0.00343661	0v8
TraesCS1B02G244200	372.296	1.18273	0.18291	6.4662	1.00499335062494e-10	6.09509657118051e-09	0v8
TraesCS1B02G244900	3267.59	0.344109	0.125993	2.73118	0.0063108	0.0342099	0v8
TraesCS1B02G245900	422.898	0.709866	0.157123	4.51789	6.24575070228638e-06	0.000114102	0v8
TraesCS1B02G248000	5370.35	-0.504904	0.119419	-4.22801	2.35767785032175e-05	0.000355476	0v8
TraesCS1B02G249700	866.302	-0.330773	0.128138	-2.58138	0.00984055	0.0480926	0v8
TraesCS1B02G251300	580.073	0.42671	0.161649	2.63974	0.00829707	0.0423106	0v8
TraesCS1B02G251900	55.4309	-1.39878	0.357118	-3.91685	8.97127344281096e-05	0.00108935	0v8
TraesCS1B02G252200	361.098	0.419764	0.160389	2.61716	0.00886659	0.0445103	0v8
TraesCS1B02G254000	489.561	-0.686845	0.149607	-4.59099	4.41151407136003e-06	8.39433199103687e-05	0v8
TraesCS1B02G254100	932.26	-0.510709	0.13116	-3.89378	9.86931547788713e-05	0.00117549	0v8
TraesCS1B02G255700	690.948	-0.813372	0.13398	-6.07083	1.27249195138645e-09	6.03327162168228e-08	0v8
TraesCS1B02G257100	290.602	-0.455165	0.175334	-2.59599	0.00943187	0.0466217	0v8
TraesCS1B02G258800	21.7308	-2.23473	0.594789	-3.75719	0.000171831	0.00186307	0v8
TraesCS1B02G260100	953.091	0.468427	0.12551	3.73218	0.000189828	0.0020211	0v8
TraesCS1B02G260400	928.038	-0.41092	0.124463	-3.30154	0.000961552	0.00764737	0v8
TraesCS1B02G261100	110.329	-0.774756	0.234568	-3.30291	0.000956859	0.00761646	0v8
TraesCS1B02G261800	540.97	-0.59023	0.155708	-3.79063	0.000150267	0.00166736	0v8
TraesCS1B02G262000	196.116	-0.941627	0.203045	-4.63752	3.52618788798047e-06	6.95015677357735e-05	0v8
TraesCS1B02G262200	1025.69	-0.515256	0.134088	-3.84267	0.000121704	0.00139562	0v8
TraesCS1B02G263500	596.057	0.810441	0.149246	5.43023	5.62813572504029e-08	1.85875983939508e-06	0v8
TraesCS1B02G264700	43.6329	-1.01594	0.351987	-2.88631	0.00389788	0.0233972	0v8
TraesCS1B02G264900	269.324	-0.742246	0.201075	-3.69138	0.000223038	0.00231089	0v8
TraesCS1B02G268500	767.263	0.568027	0.143179	3.96725	7.27067521669841e-05	0.000912956	0v8
TraesCS1B02G269100	4299.24	0.569965	0.162116	3.51578	0.000438458	0.00401602	0v8
TraesCS1B02G270800	249.041	-0.835404	0.190872	-4.37677	1.20450873053853e-05	0.000200184	0v8
TraesCS1B02G271300	20.2909	-1.62229	0.559241	-2.90089	0.00372108	0.0225508	0v8
TraesCS1B02G272100	142.897	-1.6478	0.287274	-5.73597	9.6956737649713e-09	3.85285827972293e-07	0v8
TraesCS1B02G272700	23.9606	-1.44136	0.505216	-2.85297	0.00433129	0.0254387	0v8
TraesCS1B02G273800	967.39	0.325914	0.125596	2.59493	0.009461	0.0467534	0v8
TraesCS1B02G273900	828.691	-0.498304	0.164094	-3.0367	0.00239182	0.0159135	0v8
TraesCS1B02G274000	314.65	0.460575	0.16091	2.86232	0.00420558	0.0248729	0v8
TraesCS1B02G274900	70.2198	0.831684	0.296199	2.80785	0.0049873	0.0284145	0v8
TraesCS1B02G275400	325.448	-0.419577	0.154156	-2.72177	0.00649331	0.0349511	0v8
TraesCS1B02G276800	15.2788	-2.11345	0.689991	-3.06302	0.00219117	0.014822	0v8
TraesCS1B02G278800	679.486	-0.822193	0.146354	-5.61782	1.93380111625987e-08	7.12528434688966e-07	0v8
TraesCS1B02G279200	981.067	-0.676417	0.121041	-5.58832	2.29275315245692e-08	8.27594474536791e-07	0v8
TraesCS1B02G282100	866.05	-0.582723	0.126514	-4.60599	4.10501153420546e-06	7.91226322429147e-05	0v8
TraesCS1B02G282500	524.612	0.444346	0.138223	3.21471	0.00130576	0.00979295	0v8
TraesCS1B02G284200	101.554	0.704577	0.264006	2.66879	0.00761246	0.0395775	0v8
TraesCS1B02G284300	71.4128	-1.24152	0.327778	-3.78769	0.000152052	0.00168305	0v8
TraesCS1B02G285800	196.743	0.732047	0.231955	3.15599	0.00159953	0.0115619	0v8
TraesCS1B02G287100	642.691	-0.375583	0.14458	-2.59775	0.00938357	0.0464396	0v8
TraesCS1B02G287700	294.664	-0.523003	0.174351	-2.99971	0.00270236	0.0175071	0v8
TraesCS1B02G288200	271.319	0.480461	0.180044	2.66858	0.00761723	0.0395987	0v8
TraesCS1B02G288600	1175.41	-0.351822	0.136158	-2.58393	0.00976829	0.047859	0v8
TraesCS1B02G289100	346.533	0.535137	0.151656	3.52864	0.000417708	0.00386719	0v8
TraesCS1B02G289200	1184.47	0.415057	0.138355	2.99994	0.00270033	0.0175	0v8
TraesCS1B02G291600	100.341	-0.936646	0.251986	-3.71705	0.000201562	0.00212752	0v8
TraesCS1B02G292300	226.402	-0.462607	0.17798	-2.59921	0.00934381	0.046299	0v8
TraesCS1B02G294200	9168.22	-0.382304	0.1282	-2.98208	0.00286293	0.0183213	0v8
TraesCS1B02G294300	2707.38	1.98236	0.180328	10.9931	4.12611389570034e-28	2.43724390176649e-25	0v8
TraesCS1B02G294400	2353.53	0.812813	0.115519	7.03621	1.97543833933018e-12	1.72869145787126e-10	0v8
TraesCS1B02G295600	2323.95	-0.336084	0.114548	-2.93399	0.0033463	0.0207207	0v8
TraesCS1B02G296300	2243.47	-0.442881	0.119409	-3.70895	0.000208121	0.00218308	0v8
TraesCS1B02G296400	39.5271	-5.06044	0.720622	-7.02232	2.18212837498186e-12	1.8920454377939e-10	0v8
TraesCS1B02G297900	628.741	0.561141	0.142599	3.93511	8.31601563035312e-05	0.00102315	0v8
TraesCS1B02G298100	213.915	0.754031	0.193607	3.89465	9.8338780944715e-05	0.0011725	0v8
TraesCS1B02G298300	513.409	0.480161	0.138581	3.46483	0.000530562	0.00470573	0v8
TraesCS1B02G300100	18.6972	-3.03541	0.702572	-4.32042	1.55730321515998e-05	0.000248826	0v8
TraesCS1B02G300700	219.09	0.564047	0.19664	2.86843	0.00412514	0.0244763	0v8
TraesCS1B02G301100	8496.05	0.374711	0.132661	2.82457	0.00473445	0.0272782	0v8
TraesCS1B02G302600	42.1012	1.00201	0.376926	2.65838	0.00785177	0.0405282	0v8
TraesCS1B02G302900	74.3904	0.802508	0.275774	2.91002	0.00361406	0.0220341	0v8
TraesCS1B02G303200	1253.22	-0.418212	0.131881	-3.17113	0.00151847	0.0110605	0v8
TraesCS1B02G304300	60.1318	1.47202	0.333788	4.41003	1.03354008919458e-05	0.000175683	0v8
TraesCS1B02G308500	168.29	-0.907032	0.201953	-4.4913	7.07910908869597e-06	0.000126474	0v8
TraesCS1B02G308800	433.891	0.640987	0.155505	4.12198	3.75633168025855e-05	0.000525682	0v8
TraesCS1B02G308900	297.124	-0.696292	0.218843	-3.18169	0.00146418	0.0107343	0v8
TraesCS1B02G310300	128.585	-0.728314	0.280768	-2.59401	0.00948647	0.0468466	0v8
TraesCS1B02G310800	323.823	-0.593702	0.161348	-3.67963	0.000233576	0.00239748	0v8
TraesCS1B02G311200	175.524	-0.94139	0.194154	-4.84868	1.24288535331783e-06	2.84867848791781e-05	0v8
TraesCS1B02G311800	397.995	-0.479664	0.17938	-2.67401	0.00749496	0.0391173	0v8
TraesCS1B02G312200	10.8685	-2.20818	0.748869	-2.94869	0.00319129	0.0199678	0v8
TraesCS1B02G313100	464.08	-0.553354	0.153741	-3.59925	0.000319131	0.00309609	0v8
TraesCS1B02G315300	140.329	0.836948	0.213185	3.92593	8.63965978400035e-05	0.00105677	0v8
TraesCS1B02G317000	3568.21	-0.424181	0.115808	-3.66279	0.000249484	0.00252941	0v8
TraesCS1B02G317100	404.811	0.481762	0.145652	3.30761	0.000940948	0.00750667	0v8
TraesCS1B02G317600	139.903	1.01188	0.263382	3.84186	0.000122107	0.00139911	0v8
TraesCS1B02G318800	82.9862	-1.13526	0.297931	-3.81048	0.000138695	0.00156065	0v8
TraesCS1B02G319400	4938.27	-0.315052	0.117792	-2.67465	0.00748073	0.0390646	0v8
TraesCS1B02G321000	398.175	1.1578	0.174847	6.6218	3.54841538615272e-11	2.3672522692609e-09	0v8
TraesCS1B02G321800	304.517	-0.831889	0.188613	-4.41057	1.03098721714415e-05	0.000175407	0v8
TraesCS1B02G322400	1406.81	-0.411544	0.125656	-3.27516	0.00105601	0.00825617	0v8
TraesCS1B02G324300	22.4327	1.34913	0.498567	2.70602	0.0068096	0.0363168	0v8
TraesCS1B02G325100	792.482	-0.600813	0.129755	-4.63038	3.64999468634635e-06	7.15192117083469e-05	0v8
TraesCS1B02G327200	74.0859	-1.23688	0.30511	-4.05389	5.03731512801433e-05	0.000670688	0v8
TraesCS1B02G327400	58.993	-1.19733	0.335198	-3.57202	0.00035424	0.00338288	0v8
TraesCS1B02G329500	114.472	0.6737	0.256096	2.63065	0.00852216	0.0431866	0v8
TraesCS1B02G330300	83.2891	0.767468	0.297418	2.58044	0.00986751	0.0481953	0v8
TraesCS1B02G334000	23.2444	1.57973	0.516747	3.05706	0.00223518	0.0150747	0v8
TraesCS1B02G334200	334.067	-0.474397	0.155979	-3.04141	0.00235473	0.0157072	0v8
TraesCS1B02G336000	868.955	-0.382485	0.14274	-2.67959	0.00737121	0.0386171	0v8
TraesCS1B02G337900	10.3418	2.09395	0.790451	2.64906	0.00807162	0.0414194	0v8
TraesCS1B02G338600	115.436	-1.14674	0.295327	-3.88296	0.000103192	0.00121731	0v8
TraesCS1B02G340400	507.112	0.435781	0.143422	3.03845	0.00237797	0.0158362	0v8
TraesCS1B02G341000	231.397	0.594562	0.183634	3.23776	0.00120473	0.00918832	0v8
TraesCS1B02G342700	59.6218	1.05112	0.315307	3.33364	0.000857174	0.00695875	0v8
TraesCS1B02G343700	983.939	-0.681461	0.13534	-5.03519	4.77377061265778e-07	1.24004322657523e-05	0v8
TraesCS1B02G345200	1196.76	-0.775589	0.120066	-6.45968	1.04926598963009e-10	6.34324916929255e-09	0v8
TraesCS1B02G346300	448.98	-0.550399	0.168312	-3.2701	0.00107508	0.0083879	0v8
TraesCS1B02G346600	745.057	0.442622	0.122215	3.62166	0.000292722	0.00288379	0v8
TraesCS1B02G350200	1083.04	-0.403131	0.116471	-3.46121	0.000537761	0.00475585	0v8
TraesCS1B02G350800	12.9437	-3.83834	0.981291	-3.91152	9.17158659362096e-05	0.00110868	0v8
TraesCS1B02G351300	900.377	0.371218	0.135608	2.73744	0.00619201	0.0337004	0v8
TraesCS1B02G352200	1148.16	-0.32914	0.113406	-2.90233	0.00370403	0.0224594	0v8
TraesCS1B02G352400	27.1403	2.33877	0.478089	4.89191	9.98602288053534e-07	2.36043106904392e-05	0v8
TraesCS1B02G354600	74.256	-0.823144	0.302096	-2.72478	0.00643452	0.0347071	0v8
TraesCS1B02G355600	1347.15	-0.408694	0.119655	-3.41561	0.000636402	0.00547365	0v8
TraesCS1B02G356100	315.466	0.666329	0.203433	3.27542	0.00105504	0.00825165	0v8
TraesCS1B02G360700	178.269	-0.551737	0.208453	-2.64681	0.0081254	0.0416298	0v8
TraesCS1B02G362600	2028.75	1.14451	0.145493	7.86643	3.64908876752345e-15	5.04695677198011e-13	0v8
TraesCS1B02G363000	225.257	0.535371	0.182419	2.93484	0.00333724	0.0206754	0v8
TraesCS1B02G363100	655.149	-0.51322	0.144414	-3.55381	0.000379699	0.00357959	0v8
TraesCS1B02G364000	306.195	0.505244	0.196715	2.5684	0.0102168	0.0495006	0v8
TraesCS1B02G365600	294.853	0.577786	0.164905	3.50376	0.000458745	0.00417085	0v8
TraesCS1B02G366400	592.496	0.59886	0.144366	4.14821	3.35079452475699e-05	0.000477532	0v8
TraesCS1B02G367400	53.7209	-2.90974	0.398644	-7.29909	2.89729058078636e-13	2.89759717238221e-11	0v8
TraesCS1B02G371000	643.312	-0.536647	0.14538	-3.69134	0.000223077	0.00231089	0v8
TraesCS1B02G371600	410.279	0.576657	0.170713	3.37794	0.000730321	0.00611632	0v8
TraesCS1B02G373400	188.011	0.881973	0.224302	3.93207	8.42162009598862e-05	0.00103412	0v8
TraesCS1B02G373900	694.252	-0.459226	0.162184	-2.83152	0.00463279	0.0268178	0v8
TraesCS1B02G374200	291.681	0.841398	0.201355	4.17869	2.93193775450086e-05	0.00042707	0v8
TraesCS1B02G377000	3856.91	-0.426084	0.110017	-3.87289	0.000107553	0.00126036	0v8
TraesCS1B02G378000	1029.44	0.444693	0.137277	3.23938	0.00119789	0.00914849	0v8
TraesCS1B02G379200	3475.37	-0.34199	0.117762	-2.90408	0.00368334	0.0223603	0v8
TraesCS1B02G379700	405.034	-0.967061	0.170137	-5.68402	1.31562977791763e-08	5.02384526509071e-07	0v8
TraesCS1B02G382200	311.917	-0.904283	0.171648	-5.26823	1.37743044630356e-07	4.13491640487505e-06	0v8
TraesCS1B02G382700	3298.45	0.505962	0.137709	3.67413	0.000238658	0.00243668	0v8
TraesCS1B02G384100	670.869	-0.35709	0.12904	-2.76729	0.00565246	0.0314614	0v8
TraesCS1B02G384600	144.07	0.985283	0.249873	3.94314	8.04211544362996e-05	0.000993976	0v8
TraesCS1B02G385900	441.859	0.469107	0.144456	3.24741	0.0011646	0.00895094	0v8
TraesCS1B02G388300	31.5791	-1.2228	0.475323	-2.57257	0.0100947	0.0490219	0v8
TraesCS1B02G388700	5152.27	-1.97054	0.170115	-11.5836	4.98970303639474e-31	3.98515634340564e-28	0v8
TraesCS1B02G390100	219.341	0.496652	0.189675	2.61843	0.00883343	0.044391	0v8
TraesCS1B02G390500	90.5861	0.859732	0.266983	3.22017	0.00128114	0.00964309	0v8
TraesCS1B02G390900	569.722	0.393087	0.133765	2.93864	0.0032966	0.020484	0v8
TraesCS1B02G392800	168.775	0.773468	0.210408	3.67604	0.000236881	0.00242422	0v8
TraesCS1B02G393300	41.2693	-1.51776	0.406632	-3.73252	0.00018957	0.00201873	0v8
TraesCS1B02G394500	30.8294	-1.87842	0.505609	-3.71517	0.000203064	0.00214072	0v8
TraesCS1B02G395100	382.919	0.495787	0.161658	3.06688	0.00216306	0.0146774	0v8
TraesCS1B02G396000	254.829	0.617267	0.183027	3.37253	0.000744797	0.00620879	0v8
TraesCS1B02G396800	748.19	-0.386364	0.133793	-2.88778	0.00387974	0.0233179	0v8
TraesCS1B02G402800	134.454	0.91686	0.261565	3.50528	0.000456121	0.00415232	0v8
TraesCS1B02G407500	28.6615	-1.69318	0.457934	-3.69744	0.000217784	0.00226658	0v8
TraesCS1B02G411700	720.011	-0.369071	0.142932	-2.58215	0.00981875	0.0480192	0v8
TraesCS1B02G412200	25.6342	-1.39337	0.504539	-2.76167	0.0057506	0.0319074	0v8
TraesCS1B02G414300	578.759	0.582388	0.14364	4.0545	5.02425815938125e-05	0.000669264	0v8
TraesCS1B02G416600	4669.72	0.357217	0.126578	2.82211	0.00477086	0.0274545	0v8
TraesCS1B02G416700	224.171	-0.670154	0.219364	-3.05499	0.00225068	0.0151488	0v8
TraesCS1B02G420200	60.1441	-0.989674	0.359758	-2.75095	0.00594235	0.0327025	0v8
TraesCS1B02G420600	545.278	-0.597324	0.159944	-3.73459	0.000188019	0.00200825	0v8
TraesCS1B02G422200	592.704	0.577273	0.137741	4.19102	2.77708629703329e-05	0.000408414	0v8
TraesCS1B02G423500	1971	0.335455	0.120305	2.78837	0.00529734	0.0298629	0v8
TraesCS1B02G423800	39.0841	-1.21094	0.439863	-2.753	0.00590517	0.0325548	0v8
TraesCS1B02G423900	70.7899	-2.85443	0.371527	-7.68298	1.55434389006917e-14	1.96304286481654e-12	0v8
TraesCS1B02G426700	144.549	0.602176	0.209919	2.86861	0.00412275	0.0244647	0v8
TraesCS1B02G429900	76.5533	1.24762	0.300178	4.15626	3.23494407680886e-05	0.000463468	0v8
TraesCS1B02G432400	200.475	-0.749007	0.216776	-3.45521	0.000549863	0.00484546	0v8
TraesCS1B02G432500	195.831	-0.630494	0.229805	-2.7436	0.00607693	0.0332592	0v8
TraesCS1B02G433100	78.1689	1.08158	0.380745	2.84069	0.00450166	0.0262355	0v8
TraesCS1B02G437300	28.0191	1.1772	0.435589	2.70255	0.00688094	0.0366261	0v8
TraesCS1B02G437400	505.828	0.435908	0.162005	2.69071	0.00712996	0.0376244	0v8
TraesCS1B02G442300	8532.18	-0.276744	0.102772	-2.69279	0.00708559	0.037446	0v8
TraesCS1B02G443200	6068.2	-0.442635	0.124027	-3.56886	0.000358539	0.00341703	0v8
TraesCS1B02G443700	1025.43	-1.09377	0.164377	-6.65399	2.8525011032877e-11	1.94182386030051e-09	0v8
TraesCS1B02G443900	1504.64	-0.381323	0.139844	-2.72678	0.00639548	0.0345755	0v8
TraesCS1B02G446000	598.322	0.714943	0.172191	4.15203	3.29536420858335e-05	0.000470816	0v8
TraesCS1B02G446400	94.9915	-0.989968	0.306711	-3.22769	0.00124793	0.00944915	0v8
TraesCS1B02G446700	490.901	0.502693	0.157208	3.19764	0.00138557	0.01028	0v8
TraesCS1B02G447000	232.809	0.863912	0.203936	4.23619	2.27349192506454e-05	0.000344892	0v8
TraesCS1B02G448000	194.051	0.53934	0.198366	2.71891	0.00654968	0.0352044	0v8
TraesCS1B02G448300	860.294	-0.644628	0.136631	-4.71801	2.38159283936906e-06	4.93425661487987e-05	0v8
TraesCS1B02G449500	409.111	0.612498	0.15328	3.99595	6.44341957897079e-05	0.000823457	0v8
TraesCS1B02G449700	5501.33	-0.688395	0.167412	-4.11199	3.92255142757739e-05	0.000545578	0v8
TraesCS1B02G449800	113.676	0.629409	0.243834	2.5813	0.00984278	0.0480993	0v8
TraesCS1B02G450400	660.911	0.517922	0.152228	3.40227	0.000668284	0.00567726	0v8
TraesCS1B02G451500	1013.5	-0.429144	0.120464	-3.56244	0.000367425	0.00348706	0v8
TraesCS1B02G453500	127.944	0.82105	0.221718	3.70313	0.000212956	0.00222392	0v8
TraesCS1B02G456600	350.563	-0.617097	0.170433	-3.62076	0.00029374	0.00289098	0v8
TraesCS1B02G459400	2057.13	-0.508099	0.106861	-4.75479	1.98655873326311e-06	4.24612889289175e-05	0v8
TraesCS1B02G462800	134.093	-1.30247	0.247921	-5.25358	1.49171488229574e-07	4.41488434840618e-06	0v8
TraesCS1B02G463100	306.768	-0.630555	0.18296	-3.4464	0.000568102	0.00498295	0v8
TraesCS1B02G465400	198.609	0.521526	0.183755	2.83816	0.00453745	0.0263763	0v8
TraesCS1B02G472000	719.025	0.425505	0.125748	3.38379	0.000714921	0.0060042	0v8
TraesCS1B02G472200	768.65	0.825734	0.159096	5.19017	2.10099417568909e-07	5.98989319892538e-06	0v8
TraesCS1B02G472400	253.17	0.596805	0.232523	2.56665	0.0102687	0.0496755	0v8
TraesCS1B02G474000	2366.53	0.322521	0.11269	2.86203	0.00420936	0.0248875	0v8
TraesCS1B02G474800	544.81	0.530688	0.177925	2.98265	0.00285763	0.0182957	0v8
TraesCS1B02G475400	1751.36	-0.286641	0.110209	-2.60088	0.00929842	0.046139	0v8
TraesCS1B02G476700	282.875	0.937142	0.167217	5.60435	2.09038223663028e-08	7.61807295053706e-07	0v8
TraesCS1B02G477100	274.475	0.664859	0.174971	3.79982	0.000144803	0.00161797	0v8
TraesCS1B02G477900	162.251	-0.847812	0.257447	-3.29315	0.000990727	0.00783436	0v8
TraesCS1B02G478800	3254.92	-0.625387	0.112599	-5.55412	2.79010981729228e-08	9.85155462636214e-07	0v8
TraesCS1B02G479300	798.47	0.372691	0.139513	2.67138	0.00755406	0.0393388	0v8
TraesCS1B02G480100	4986.72	0.424685	0.113904	3.72846	0.000192656	0.00204813	0v8
TraesCS1B02G480400	1551.68	0.43138	0.134025	3.21865	0.00128794	0.00968747	0v8
TraesCS1D02G001600	23.7878	-3.08643	0.643119	-4.79916	1.59332160616645e-06	3.51696749705234e-05	0v8
TraesCS1D02G002200	1288.68	0.396889	0.124304	3.19288	0.00140859	0.0104141	0v8
TraesCS1D02G002600	75.7306	-0.869519	0.311784	-2.78885	0.00528961	0.0298371	0v8
TraesCS1D02G004200	2783.43	-0.440829	0.116368	-3.78825	0.000151713	0.00167963	0v8
TraesCS1D02G005300	258.66	-0.577181	0.186298	-3.09816	0.00194725	0.0135154	0v8
TraesCS1D02G010200	1110.03	0.800178	0.145662	5.49339	3.94283186063705e-08	1.34850556989918e-06	0v8
TraesCS1D02G011300	34.3242	-1.57005	0.451596	-3.47668	0.000507672	0.00453498	0v8
TraesCS1D02G012600	524.191	-0.657192	0.153943	-4.26906	1.96301748217055e-05	0.000303861	0v8
TraesCS1D02G015800	188.18	0.583401	0.224455	2.59918	0.00934454	0.046299	0v8
TraesCS1D02G017600	423.407	-1.96275	0.224341	-8.74899	2.15273129589584e-18	4.90252131988232e-16	0v8
TraesCS1D02G018200	434.337	0.386534	0.149166	2.59129	0.00956165	0.0471104	0v8
TraesCS1D02G020000	10185.6	-0.415192	0.103214	-4.02264	5.7548503407294e-05	0.000751577	0v8
TraesCS1D02G022900	377.01	0.549808	0.152246	3.61131	0.000304651	0.00298008	0v8
TraesCS1D02G024300	123.812	0.697678	0.229131	3.04489	0.00232768	0.0155726	0v8
TraesCS1D02G025400	549.777	-0.544935	0.156955	-3.47192	0.000516751	0.00460159	0v8
TraesCS1D02G026100	256.288	0.560922	0.178042	3.1505	0.00162989	0.0117424	0v8
TraesCS1D02G030600	697.614	-0.653105	0.131744	-4.9574	7.14442633521639e-07	1.75991242295734e-05	0v8
TraesCS1D02G031500	258.08	-0.714849	0.16545	-4.32064	1.55575238374811e-05	0.00024866	0v8
TraesCS1D02G032200	302.636	0.624363	0.200077	3.12061	0.00180479	0.0127418	0v8
TraesCS1D02G034100	1402.84	0.453171	0.12111	3.74181	0.000182696	0.00195989	0v8
TraesCS1D02G034700	1843.97	-0.393208	0.141542	-2.77802	0.0054691	0.0306302	0v8
TraesCS1D02G035300	2088.85	0.387877	0.106831	3.63075	0.000282599	0.00280011	0v8
TraesCS1D02G035600	28.7397	1.69359	0.461517	3.66962	0.000242911	0.00247432	0v8
TraesCS1D02G036300	454.027	0.435116	0.157895	2.75573	0.00585613	0.0323694	0v8
TraesCS1D02G038100	62.5635	1.66594	0.330204	5.04519	4.53079250666641e-07	1.18234293549482e-05	0v8
TraesCS1D02G040700	353.115	0.69193	0.163097	4.24245	2.2108996698906e-05	0.000336116	0v8
TraesCS1D02G041900	11.2014	-1.96127	0.715451	-2.74131	0.00611943	0.0334144	0v8
TraesCS1D02G042700	170.301	-1.41425	0.267803	-5.28093	1.28532412045541e-07	3.90598014868943e-06	0v8
TraesCS1D02G044000	370.107	0.731438	0.149349	4.8975	9.70655178757364e-07	2.30301140446088e-05	0v8
TraesCS1D02G049800	28.0022	1.43638	0.495964	2.89614	0.00377788	0.0228267	0v8
TraesCS1D02G051900	2474.17	0.299065	0.106631	2.80466	0.0050369	0.0286511	0v8
TraesCS1D02G053000	3006.37	-0.96292	0.120717	-7.97667	1.5033308989087e-15	2.20849435112737e-13	0v8
TraesCS1D02G059300	86.5582	0.69064	0.252814	2.73181	0.00629875	0.0341632	0v8
TraesCS1D02G059600	85.8378	1.07387	0.269232	3.98864	6.64528925497804e-05	0.000844716	0v8
TraesCS1D02G060900	40.2727	1.54174	0.4575	3.36992	0.000751909	0.00625738	0v8
TraesCS1D02G061400	168.091	0.609123	0.214092	2.84514	0.00443914	0.0259458	0v8
TraesCS1D02G061600	689.645	0.436097	0.128212	3.40137	0.000670491	0.00568919	0v8
TraesCS1D02G062800	61.6267	-0.89994	0.307446	-2.92715	0.00342082	0.0210711	0v8
TraesCS1D02G064500	657.297	-0.564255	0.149255	-3.78047	0.000156535	0.00172459	0v8
TraesCS1D02G066600	400.861	0.629357	0.163234	3.85554	0.000115474	0.00133825	0v8
TraesCS1D02G067200	668.884	0.417521	0.13483	3.09665	0.00195723	0.0135763	0v8
TraesCS1D02G067800	210.639	0.530542	0.19792	2.68058	0.00734937	0.038524	0v8
TraesCS1D02G069400	657.272	-0.444803	0.140007	-3.177	0.00148806	0.0108739	0v8
TraesCS1D02G069800	25.815	-1.36613	0.473558	-2.88483	0.00391626	0.0234841	0v8
TraesCS1D02G072700	81.1286	-1.16169	0.268756	-4.32246	1.54296784246287e-05	0.000246953	0v8
TraesCS1D02G073500	133.141	0.763689	0.241509	3.16216	0.00156606	0.0113503	0v8
TraesCS1D02G074400	1044.13	0.413669	0.12271	3.37112	0.000748627	0.00623556	0v8
TraesCS1D02G075600	118.493	0.734649	0.232871	3.15475	0.00160635	0.0116012	0v8
TraesCS1D02G077600	2073.67	-0.514566	0.126156	-4.07881	4.52676012243407e-05	0.000615722	0v8
TraesCS1D02G078000	212.613	-0.498398	0.191075	-2.60839	0.00909704	0.045378	0v8
TraesCS1D02G079300	415.048	0.491772	0.154381	3.18545	0.00144529	0.0106285	0v8
TraesCS1D02G079800	506.518	-0.656904	0.175376	-3.7457	0.000179892	0.00193457	0v8
TraesCS1D02G081200	1602.72	-1.51772	0.122886	-12.3507	4.83189478020151e-35	4.89281116796619e-32	0v8
TraesCS1D02G081900	363.123	0.471504	0.148163	3.18233	0.00146095	0.010718	0v8
TraesCS1D02G082300	277.14	0.557304	0.166793	3.3413	0.000833884	0.00679888	0v8
TraesCS1D02G082600	70.1642	-1.04965	0.318594	-3.29463	0.000985523	0.00780082	0v8
TraesCS1D02G084400	156.251	-0.742247	0.24162	-3.07196	0.0021266	0.0144941	0v8
TraesCS1D02G085900	175.429	-0.809754	0.247148	-3.27639	0.00105142	0.00822758	0v8
TraesCS1D02G086400	398.236	0.460072	0.161239	2.85335	0.00432608	0.0254171	0v8
TraesCS1D02G087300	145.055	1.04743	0.250026	4.18929	2.79827540959355e-05	0.000411086	0v8
TraesCS1D02G088800	324.661	-0.810449	0.187516	-4.32203	1.54601569382532e-05	0.000247301	0v8
TraesCS1D02G089100	102.931	1.05504	0.255507	4.1292	3.64032811646367e-05	0.00051146	0v8
TraesCS1D02G090600	80.4218	0.718362	0.278095	2.58315	0.00979017	0.047929	0v8
TraesCS1D02G092200	487.586	-0.456596	0.141828	-3.21936	0.00128476	0.00966744	0v8
TraesCS1D02G093300	99.4316	0.685643	0.245879	2.78854	0.00529469	0.0298569	0v8
TraesCS1D02G094600	1152.25	-0.339418	0.127748	-2.65693	0.0078856	0.040651	0v8
TraesCS1D02G098500	805.259	-0.540428	0.133784	-4.03957	5.35488413023325e-05	0.000707324	0v8
TraesCS1D02G101200	718.286	-0.430058	0.136806	-3.14357	0.00166902	0.0119812	0v8
TraesCS1D02G101900	30.0507	-1.52802	0.446911	-3.41906	0.000628371	0.00541994	0v8
TraesCS1D02G103200	284.528	-5.19171	0.711336	-7.29854	2.90913867379113e-13	2.90432425415493e-11	0v8
TraesCS1D02G104200	1633.21	-0.301259	0.116398	-2.58818	0.00964832	0.0474352	0v8
TraesCS1D02G104500	28.0043	-1.99261	0.507109	-3.92935	8.51759406746216e-05	0.0010441	0v8
TraesCS1D02G105800	88.6373	-0.924091	0.275273	-3.357	0.00078794	0.00649055	0v8
TraesCS1D02G106500	3032.02	-0.514255	0.116964	-4.3967	1.09908316583871e-05	0.000184885	0v8
TraesCS1D02G108100	333.227	-1.01374	0.23045	-4.39896	1.08771562408995e-05	0.00018319	0v8
TraesCS1D02G110700	548.814	0.383426	0.137991	2.77864	0.00545873	0.0305993	0v8
TraesCS1D02G111000	254.644	1.00985	0.168587	5.99009	2.09722266424175e-09	9.40863199355163e-08	0v8
TraesCS1D02G111300	1678.63	-0.484133	0.120865	-4.00555	6.18721808585133e-05	0.000798117	0v8
TraesCS1D02G111700	589.077	-0.36856	0.130612	-2.8218	0.00477554	0.0274758	0v8
TraesCS1D02G115300	568.243	0.520341	0.138696	3.75166	0.000175665	0.00189704	0v8
TraesCS1D02G115800	222.371	-0.580633	0.209715	-2.76869	0.0056283	0.0313546	0v8
TraesCS1D02G117600	24.1567	1.31556	0.49332	2.66675	0.00765896	0.0397501	0v8
TraesCS1D02G118300	121.273	0.967615	0.266954	3.62466	0.000289344	0.00285746	0v8
TraesCS1D02G121000	1366.98	0.551494	0.136761	4.03255	5.517574295528e-05	0.000724762	0v8
TraesCS1D02G123500	29.8031	1.42855	0.462048	3.09178	0.00198961	0.0137505	0v8
TraesCS1D02G124500	643.034	-0.394314	0.139898	-2.81859	0.00482357	0.027696	0v8
TraesCS1D02G124900	222.921	-0.496148	0.190429	-2.60542	0.00917619	0.0456603	0v8
TraesCS1D02G126300	834.209	-0.391092	0.134096	-2.9165	0.00353985	0.0216678	0v8
TraesCS1D02G126400	169.068	0.754228	0.223448	3.3754	0.000737083	0.0061611	0v8
TraesCS1D02G126600	852.468	-0.470218	0.135197	-3.47803	0.000505106	0.00451561	0v8
TraesCS1D02G129300	302.472	0.627191	0.211322	2.96794	0.00299802	0.0189851	0v8
TraesCS1D02G130000	68.477	0.955923	0.303155	3.15325	0.00161466	0.0116467	0v8
TraesCS1D02G131200	503.589	-0.455429	0.141039	-3.22911	0.00124175	0.00941492	0v8
TraesCS1D02G131800	2772.54	-0.652572	0.100589	-6.48752	8.72627154728042e-11	5.36694093666034e-09	0v8
TraesCS1D02G132800	634.925	-0.692862	0.135016	-5.1317	2.87141678727433e-07	7.8698192527394e-06	0v8
TraesCS1D02G133200	110.722	-0.729266	0.258371	-2.82255	0.00476434	0.0274253	0v8
TraesCS1D02G136900	1563.81	-0.558926	0.115794	-4.82691	1.38665078239195e-06	3.1227728064463e-05	0v8
TraesCS1D02G137600	22.1827	1.80533	0.518666	3.48071	0.00050008	0.00447913	0v8
TraesCS1D02G138600	390.753	0.498677	0.166647	2.99242	0.00276772	0.0178551	0v8
TraesCS1D02G139000	1297.64	0.467763	0.153595	3.04542	0.00232353	0.0155504	0v8
TraesCS1D02G139100	1150.57	-0.310367	0.115814	-2.67987	0.00736515	0.0385925	0v8
TraesCS1D02G141700	1130.63	-0.415187	0.12579	-3.30063	0.000964674	0.00766468	0v8
TraesCS1D02G141800	1014.07	-0.398205	0.133602	-2.98054	0.0028774	0.0183874	0v8
TraesCS1D02G142200	1420.06	0.492343	0.172901	2.84755	0.00440574	0.0257851	0v8
TraesCS1D02G142700	545.474	-0.656868	0.147892	-4.44152	8.93242968378823e-06	0.000155423	0v8
TraesCS1D02G143600	29.189	-1.26014	0.484096	-2.60308	0.00923898	0.0459325	0v8
TraesCS1D02G144000	2809.58	-0.451658	0.132938	-3.3975	0.000680041	0.00575902	0v8
TraesCS1D02G144400	218.929	-0.654915	0.180589	-3.62655	0.00028723	0.00284005	0v8
TraesCS1D02G144900	41.6708	1.03932	0.376773	2.75847	0.00580718	0.0321521	0v8
TraesCS1D02G146100	4011.97	-0.50558	0.132961	-3.80247	0.000143258	0.00160482	0v8
TraesCS1D02G146500	1097.75	-0.375223	0.13588	-2.76142	0.00575504	0.0319174	0v8
TraesCS1D02G146900	285.033	0.566813	0.159473	3.5543	0.000378991	0.00357351	0v8
TraesCS1D02G147200	171.383	0.572056	0.211144	2.70932	0.00674213	0.0360175	0v8
TraesCS1D02G147600	2641	-0.412798	0.114341	-3.61022	0.000305932	0.00299055	0v8
TraesCS1D02G148000	292.107	-0.681534	0.192712	-3.53654	0.000405411	0.00377802	0v8
TraesCS1D02G148400	208.831	0.591638	0.19865	2.97829	0.00289863	0.0184934	0v8
TraesCS1D02G148900	792.809	-0.67249	0.147521	-4.55862	5.14917137396145e-06	9.61755309393471e-05	0v8
TraesCS1D02G150800	117.507	0.806334	0.285044	2.82881	0.00467217	0.0270016	0v8
TraesCS1D02G153900	9561.62	-0.491492	0.105099	-4.67646	2.91868244312719e-06	5.91729734072115e-05	0v8
TraesCS1D02G154300	249.152	0.710104	0.211323	3.36028	0.000778621	0.00643528	0v8
TraesCS1D02G156000	2627.46	-0.4325	0.123827	-3.49278	0.000478023	0.00431362	0v8
TraesCS1D02G156200	287.869	0.482082	0.177536	2.7154	0.00661956	0.0354892	0v8
TraesCS1D02G156600	29.8179	1.3496	0.46548	2.89938	0.00373899	0.02264	0v8
TraesCS1D02G158000	304.205	1.34343	0.469804	2.85955	0.00424245	0.0250257	0v8
TraesCS1D02G158700	254.117	1.75295	0.190401	9.20659	3.36641598742944e-20	9.35764632270461e-18	0v8
TraesCS1D02G160500	623.438	0.480126	0.162604	2.95273	0.00314978	0.0197579	0v8
TraesCS1D02G161400	445.8	0.450505	0.158052	2.85036	0.00436698	0.0255979	0v8
TraesCS1D02G161500	412.706	1.13943	0.233373	4.88246	1.04773089004885e-06	2.45913194747973e-05	0v8
TraesCS1D02G161700	93.3103	0.734795	0.257294	2.85586	0.00429202	0.0252498	0v8
TraesCS1D02G162200	296.548	0.606305	0.20182	3.00419	0.00266289	0.0173028	0v8
TraesCS1D02G162600	885.54	-0.454741	0.145848	-3.11791	0.0018214	0.0128319	0v8
TraesCS1D02G163400	128.203	0.763745	0.224242	3.4059	0.000659471	0.00561923	0v8
TraesCS1D02G164800	1617.27	-0.41249	0.121751	-3.38799	0.00070406	0.00592905	0v8
TraesCS1D02G166000	9.79276	-4.25666	1.07527	-3.95869	7.53626258682209e-05	0.00094006	0v8
TraesCS1D02G166600	1037.22	-0.424672	0.115439	-3.67876	0.000234371	0.00240391	0v8
TraesCS1D02G167400	47.2858	-0.956902	0.342317	-2.79536	0.00518412	0.029356	0v8
TraesCS1D02G167600	1577.73	-0.642943	0.154192	-4.16975	3.04932428096684e-05	0.000441335	0v8
TraesCS1D02G168700	2077.32	-0.35729	0.131783	-2.71119	0.00670419	0.0358649	0v8
TraesCS1D02G174600	145.67	0.669083	0.21016	3.18369	0.00145409	0.0106801	0v8
TraesCS1D02G174900	1106.26	-0.357313	0.115847	-3.08434	0.00204005	0.0140273	0v8
TraesCS1D02G184400	46.6275	-1.10916	0.41692	-2.66037	0.00780538	0.0403364	0v8
TraesCS1D02G184500	1318.79	-0.495633	0.130764	-3.79029	0.00015047	0.00166879	0v8
TraesCS1D02G184700	225.549	0.635378	0.202361	3.13983	0.00169047	0.0121081	0v8
TraesCS1D02G184800	522.501	-0.412271	0.149618	-2.75549	0.00586049	0.0323872	0v8
TraesCS1D02G184900	20.2442	-1.53717	0.536803	-2.86357	0.00418897	0.0247902	0v8
TraesCS1D02G185600	1398.43	-0.489802	0.11794	-4.15296	3.28202881649636e-05	0.000469502	0v8
TraesCS1D02G185900	25.1518	1.29231	0.475618	2.71713	0.00658513	0.0353346	0v8
TraesCS1D02G187000	324.687	0.582434	0.170412	3.4178	0.000631304	0.00543806	0v8
TraesCS1D02G187500	182.16	-0.672258	0.229367	-2.93092	0.00337956	0.020876	0v8
TraesCS1D02G187900	1135.81	0.675536	0.146509	4.61089	4.00952003281922e-06	7.75192100174043e-05	0v8
TraesCS1D02G189300	292.381	0.58414	0.181398	3.22021	0.00128097	0.00964309	0v8
TraesCS1D02G190900	522.888	0.438948	0.142744	3.07506	0.00210458	0.0143751	0v8
TraesCS1D02G191800	46.893	-2.80944	0.530582	-5.29502	1.19002484739003e-07	3.64371214881743e-06	0v8
TraesCS1D02G192500	625.602	0.475694	0.137284	3.46503	0.000530177	0.00470341	0v8
TraesCS1D02G194400	132.302	0.652435	0.217412	3.00092	0.00269165	0.0174503	0v8
TraesCS1D02G194600	3119.93	0.352165	0.133887	2.63031	0.00853065	0.0432067	0v8
TraesCS1D02G196600	19.3973	1.53232	0.584219	2.62285	0.00871985	0.0439241	0v8
TraesCS1D02G197600	13.8005	-2.08418	0.67443	-3.09028	0.00199971	0.0138051	0v8
TraesCS1D02G199800	286.344	0.664436	0.180238	3.68644	0.00022741	0.00234763	0v8
TraesCS1D02G200100	1090.13	-0.47106	0.122599	-3.84228	0.000121898	0.001397	0v8
TraesCS1D02G200300	76.796	-0.773598	0.274969	-2.81341	0.00490199	0.0280496	0v8
TraesCS1D02G200500	145.402	0.690357	0.214214	3.22275	0.00126967	0.00957801	0v8
TraesCS1D02G200600	46.7567	1.10532	0.383457	2.88252	0.00394503	0.0236177	0v8
TraesCS1D02G202700	1639.74	0.417752	0.135474	3.08363	0.0020449	0.0140521	0v8
TraesCS1D02G206000	136.252	0.768131	0.24816	3.09531	0.00196608	0.0136204	0v8
TraesCS1D02G206800	97.3575	-1.44874	0.310838	-4.66076	3.15046495571328e-06	6.32166545572106e-05	0v8
TraesCS1D02G207400	344.648	-0.663219	0.201178	-3.29668	0.000978341	0.00775263	0v8
TraesCS1D02G208400	160.224	1.70531	0.308494	5.52785	3.24176293718668e-08	1.13124559456066e-06	0v8
TraesCS1D02G208700	298.28	-0.501019	0.173965	-2.88	0.00397678	0.0237566	0v8
TraesCS1D02G209200	238.347	0.581095	0.194577	2.98645	0.00282234	0.0181188	0v8
TraesCS1D02G210400	50.0888	-1.23829	0.358267	-3.45633	0.000547588	0.00482841	0v8
TraesCS1D02G211700	523.084	-0.42451	0.134207	-3.16309	0.00156102	0.0113181	0v8
TraesCS1D02G212100	9.4285	-2.84748	0.902949	-3.15354	0.00161303	0.0116372	0v8
TraesCS1D02G212200	59.9777	-0.87468	0.32784	-2.66801	0.00763026	0.0396352	0v8
TraesCS1D02G216200	138.77	-0.844908	0.224006	-3.77182	0.000162062	0.00177343	0v8
TraesCS1D02G216400	266.988	-1.07812	0.183347	-5.88023	4.09698871424542e-09	1.74025349835207e-07	0v8
TraesCS1D02G218300	271.476	-0.696463	0.22425	-3.10574	0.00189805	0.0132501	0v8
TraesCS1D02G218600	326.432	0.46317	0.164327	2.81859	0.00482352	0.027696	0v8
TraesCS1D02G218800	187.278	-1.65108	0.251593	-6.56249	5.29163177663217e-11	3.39442614848081e-09	0v8
TraesCS1D02G219200	1086.55	0.429223	0.14642	2.93145	0.00337389	0.0208546	0v8
TraesCS1D02G219400	194.77	0.924814	0.193327	4.78367	1.72122312179532e-06	3.76848178936392e-05	0v8
TraesCS1D02G219600	1100.01	0.410989	0.122017	3.36829	0.000756366	0.00628801	0v8
TraesCS1D02G220100	556.234	0.496112	0.168187	2.94976	0.00318021	0.0199092	0v8
TraesCS1D02G221800	5.97216	-6.03232	1.45514	-4.14554	3.39018567332932e-05	0.000482419	0v8
TraesCS1D02G222600	1942.98	-0.602649	0.128498	-4.68996	2.73257417633958e-06	5.56785308097422e-05	0v8
TraesCS1D02G223200	944.546	-0.81048	0.141808	-5.71534	1.09481775285136e-08	4.30532146277316e-07	0v8
TraesCS1D02G226100	797.185	-0.483967	0.137215	-3.52708	0.000420173	0.00388431	0v8
TraesCS1D02G226500	671.375	0.619772	0.173757	3.56688	0.000361257	0.00343658	0v8
TraesCS1D02G230900	361.085	2.90463	0.502425	5.78122	7.41615928460222e-09	2.98891775687742e-07	0v8
TraesCS1D02G231200	488.135	-0.521323	0.139537	-3.7361	0.000186898	0.0019974	0v8
TraesCS1D02G231700	312.062	-0.788193	0.220144	-3.58035	0.000343129	0.00329565	0v8
TraesCS1D02G232100	242.66	1.45292	0.176297	8.24131	1.70331095139413e-16	2.94475459785839e-14	0v8
TraesCS1D02G233300	3330.78	0.450011	0.132694	3.39134	0.00069551	0.00586986	0v8
TraesCS1D02G234000	467.489	0.843955	0.162305	5.1998	1.9949885323917e-07	5.72799087178753e-06	0v8
TraesCS1D02G234500	176.946	-0.574534	0.216481	-2.65397	0.00795514	0.0409217	0v8
TraesCS1D02G234800	28.6692	1.27212	0.457515	2.7805	0.00542755	0.0304607	0v8
TraesCS1D02G236300	901.843	-0.498114	0.128226	-3.88464	0.00010248	0.00121092	0v8
TraesCS1D02G236500	7403.96	-0.512786	0.122832	-4.17468	2.98409869541933e-05	0.000433999	0v8
TraesCS1D02G237900	376.495	0.578223	0.183506	3.15098	0.00162725	0.0117276	0v8
TraesCS1D02G238900	215.329	-0.557791	0.189857	-2.93795	0.00330387	0.0205195	0v8
TraesCS1D02G242500	533.995	-0.618852	0.156964	-3.94263	8.05915657672958e-05	0.000995648	0v8
TraesCS1D02G243300	756.161	0.395936	0.12948	3.05791	0.00222889	0.0150423	0v8
TraesCS1D02G244200	564.487	-0.420255	0.157084	-2.67535	0.00746505	0.0390043	0v8
TraesCS1D02G245200	869.758	0.51543	0.13657	3.7741	0.000160586	0.00175911	0v8
TraesCS1D02G245700	270.874	-0.848385	0.185874	-4.5643	5.01174473106806e-06	9.39801576454845e-05	0v8
TraesCS1D02G248900	897.71	0.485137	0.124268	3.90395	9.46370992764727e-05	0.00113604	0v8
TraesCS1D02G249700	486.34	-0.859902	0.161831	-5.31357	1.07498918839158e-07	3.34018284476345e-06	0v8
TraesCS1D02G250900	289.313	-0.748	0.174732	-4.28085	1.86178600289932e-05	0.000290599	0v8
TraesCS1D02G251100	1050.16	-0.316032	0.122198	-2.58623	0.00970317	0.0476017	0v8
TraesCS1D02G253400	79.0902	0.728125	0.26497	2.74795	0.00599691	0.0329277	0v8
TraesCS1D02G254100	41.4631	1.34554	0.378969	3.55054	0.00038444	0.00361347	0v8
TraesCS1D02G254200	438.129	0.639316	0.17309	3.69354	0.000221152	0.00229472	0v8
TraesCS1D02G257400	814.877	0.587803	0.153783	3.82228	0.000132222	0.00149805	0v8
TraesCS1D02G257800	2748.1	0.639529	0.176183	3.62992	0.000283509	0.00280864	0v8
TraesCS1D02G259100	32.2769	1.18101	0.440572	2.68063	0.00734845	0.0385228	0v8
TraesCS1D02G259200	122.125	0.924797	0.223605	4.13585	3.53643620282181e-05	0.000499843	0v8
TraesCS1D02G259600	546.565	-0.375745	0.145778	-2.57751	0.00995139	0.0484963	0v8
TraesCS1D02G260200	271.34	-0.512104	0.16316	-3.13866	0.00169725	0.0121428	0v8
TraesCS1D02G261900	13443.8	0.379738	0.121371	3.12874	0.00175557	0.0124626	0v8
TraesCS1D02G262200	908.325	0.442988	0.120109	3.68823	0.000225817	0.00233586	0v8
TraesCS1D02G262800	395.888	-0.507956	0.162439	-3.12705	0.0017657	0.0125128	0v8
TraesCS1D02G263600	555.656	0.426642	0.140189	3.04334	0.00233968	0.0156344	0v8
TraesCS1D02G265100	212.702	0.567498	0.184168	3.08142	0.00206014	0.0141346	0v8
TraesCS1D02G268400	270.23	0.669637	0.172354	3.88525	0.000102225	0.00120892	0v8
TraesCS1D02G268600	1050.87	-0.56637	0.123915	-4.57064	4.86242131311644e-06	9.153365318913e-05	0v8
TraesCS1D02G269100	579.655	0.343371	0.132993	2.58187	0.00982673	0.0480416	0v8
TraesCS1D02G272800	1039.43	-0.595108	0.128988	-4.61367	3.95620349832873e-06	7.66645133528608e-05	0v8
TraesCS1D02G273200	646.857	0.624273	0.13363	4.67164	2.98807809071868e-06	6.02996285453002e-05	0v8
TraesCS1D02G275800	433.791	-0.835251	0.154522	-5.40537	6.46754410774598e-08	2.1029160331069e-06	0v8
TraesCS1D02G276100	153.95	0.869914	0.249622	3.48493	0.000492268	0.00442462	0v8
TraesCS1D02G276400	65.0541	-1.50432	0.30847	-4.87673	1.07857948209077e-06	2.51902504577591e-05	0v8
TraesCS1D02G276600	48.5774	-1.32922	0.429455	-3.09512	0.0019673	0.0136229	0v8
TraesCS1D02G278800	1061.12	-0.414978	0.128904	-3.21927	0.00128517	0.00966796	0v8
TraesCS1D02G279400	993.734	0.408107	0.139558	2.92427	0.00345266	0.0212396	0v8
TraesCS1D02G280000	903.337	0.570045	0.18592	3.06608	0.00216887	0.0147079	0v8
TraesCS1D02G280600	31.349	-1.3478	0.452628	-2.97771	0.00290407	0.0185198	0v8
TraesCS1D02G280700	741.878	-0.346106	0.133999	-2.5829	0.00979735	0.047955	0v8
TraesCS1D02G281900	66.7081	-0.948861	0.318	-2.98384	0.00284654	0.0182391	0v8
TraesCS1D02G283000	41.5642	-1.721	0.505254	-3.40621	0.000658723	0.0056141	0v8
TraesCS1D02G283800	6911.18	-0.359119	0.13717	-2.61807	0.00884299	0.0444233	0v8
TraesCS1D02G283900	10.489	-2.16472	0.791183	-2.73605	0.00621807	0.0338065	0v8
TraesCS1D02G284000	3139.25	1.23452	0.337747	3.65516	0.000257023	0.00258969	0v8
TraesCS1D02G284200	2006.53	0.704648	0.119077	5.91758	3.26707604120357e-09	1.41206413104032e-07	0v8
TraesCS1D02G285100	525.044	-0.402651	0.137858	-2.92077	0.00349167	0.0214377	0v8
TraesCS1D02G285200	1939.66	-0.458257	0.115355	-3.97256	7.1103501984842e-05	0.000895617	0v8
TraesCS1D02G285500	161.036	-0.668295	0.203637	-3.28179	0.00103151	0.00810259	0v8
TraesCS1D02G285800	2790.82	-0.543989	0.112994	-4.81433	1.47692465677645e-06	3.29726336957344e-05	0v8
TraesCS1D02G287500	765.262	0.733948	0.126907	5.78336	7.32215661335978e-09	2.9594455660526e-07	0v8
TraesCS1D02G287800	6172.85	-0.339707	0.126754	-2.68005	0.0073612	0.0385754	0v8
TraesCS1D02G288700	40.9248	-3.73503	1.06276	-3.51446	0.000440657	0.00403096	0v8
TraesCS1D02G289400	21.2108	-3.12244	0.631524	-4.94429	7.64200280880121e-07	1.86948840067248e-05	0v8
TraesCS1D02G290100	2640.04	-0.778753	0.16515	-4.71542	2.41208082074472e-06	4.99377345823842e-05	0v8
TraesCS1D02G291100	41.8744	1.21627	0.408767	2.97546	0.00292547	0.0186165	0v8
TraesCS1D02G291500	80.7379	0.97862	0.267402	3.65973	0.000252479	0.00255297	0v8
TraesCS1D02G294400	141.303	0.931385	0.284804	3.27027	0.00107446	0.00838424	0v8
TraesCS1D02G295000	882.966	0.481646	0.148556	3.24218	0.00118619	0.00907627	0v8
TraesCS1D02G297400	44.4719	2.22844	0.48827	4.56396	5.01972527252875e-06	9.40365184354196e-05	0v8
TraesCS1D02G299700	300.709	-0.529329	0.182031	-2.90791	0.00363852	0.0221377	0v8
TraesCS1D02G301100	146.472	-0.767749	0.223348	-3.43746	0.000587207	0.005122	0v8
TraesCS1D02G301300	2086.84	0.306674	0.113162	2.71005	0.00672733	0.0359547	0v8
TraesCS1D02G301400	438.431	-0.4503	0.152717	-2.94859	0.0031923	0.0199697	0v8
TraesCS1D02G303900	558.984	0.58914	0.145979	4.0358	5.44176020123278e-05	0.000716463	0v8
TraesCS1D02G305700	224.973	0.500392	0.193583	2.5849	0.00974085	0.0477494	0v8
TraesCS1D02G305800	153.105	0.57772	0.210511	2.74436	0.00606288	0.0331899	0v8
TraesCS1D02G305900	3842.06	-0.380031	0.112499	-3.37808	0.000729925	0.00611481	0v8
TraesCS1D02G307100	768.433	0.315948	0.122078	2.58809	0.00965089	0.0474396	0v8
TraesCS1D02G308100	6116.99	-0.346886	0.123519	-2.80836	0.00497938	0.0283751	0v8
TraesCS1D02G309300	1208.22	0.760218	0.144817	5.2495	1.52508839964313e-07	4.49722635414266e-06	0v8
TraesCS1D02G309400	542.609	0.892392	0.144305	6.18405	6.24772290511743e-10	3.18886926244455e-08	0v8
TraesCS1D02G310000	304.078	-0.564465	0.176934	-3.19025	0.00142149	0.0104944	0v8
TraesCS1D02G311000	81.3214	-3.37377	0.838555	-4.02331	5.73850684538156e-05	0.000750306	0v8
TraesCS1D02G313800	1020.13	-0.677668	0.128781	-5.26219	1.42352896017842e-07	4.24409217749093e-06	0v8
TraesCS1D02G314000	112.717	1.12035	0.236498	4.73727	2.16619426834474e-06	4.55962183299024e-05	0v8
TraesCS1D02G314800	143.369	-0.977548	0.24398	-4.00667	6.15800672516077e-05	0.000795254	0v8
TraesCS1D02G319000	183.137	-1.21865	0.205234	-5.93784	2.88797622888747e-09	1.26070500412081e-07	0v8
TraesCS1D02G319200	129.139	-0.813711	0.247699	-3.28507	0.00101956	0.00802316	0v8
TraesCS1D02G320900	128.439	-0.679823	0.255743	-2.65822	0.00785539	0.0405431	0v8
TraesCS1D02G321700	14.0121	2.60254	0.698924	3.72364	0.000196375	0.00208259	0v8
TraesCS1D02G322100	302.837	-0.596589	0.162658	-3.66775	0.000244695	0.0024898	0v8
TraesCS1D02G322400	644.282	0.492977	0.139938	3.52283	0.000426973	0.00393018	0v8
TraesCS1D02G327100	171.663	-0.829574	0.277357	-2.991	0.00278066	0.0179182	0v8
TraesCS1D02G328000	48.6799	-1.41551	0.417103	-3.39367	0.000689623	0.00582577	0v8
TraesCS1D02G329100	657.534	0.3764	0.129398	2.90885	0.00362758	0.0220843	0v8
TraesCS1D02G330800	49.5941	1.6861	0.348367	4.84002	1.298259619961e-06	2.95659076343408e-05	0v8
TraesCS1D02G331300	476.728	-0.394277	0.150903	-2.61279	0.00898075	0.04496	0v8
TraesCS1D02G332500	1343.63	-0.656406	0.126594	-5.18513	2.15858688803186e-07	6.13558035452303e-06	0v8
TraesCS1D02G332600	317.239	-0.522192	0.156297	-3.34103	0.000834694	0.00680353	0v8
TraesCS1D02G332700	1208.39	0.392711	0.122835	3.19706	0.00138836	0.010298	0v8
TraesCS1D02G334000	183.812	-0.568975	0.207553	-2.74134	0.00611886	0.0334144	0v8
TraesCS1D02G334100	108.218	-0.780846	0.254363	-3.06981	0.00214196	0.0145743	0v8
TraesCS1D02G335800	918.971	0.496515	0.136649	3.63349	0.000279609	0.00277583	0v8
TraesCS1D02G336200	940.054	0.395446	0.147856	2.67453	0.00748331	0.0390744	0v8
TraesCS1D02G338800	192.937	0.60335	0.205154	2.94096	0.00327197	0.0203465	0v8
TraesCS1D02G339700	1011.09	-0.374166	0.118354	-3.16143	0.00156996	0.0113741	0v8
TraesCS1D02G341100	231.917	0.921715	0.253034	3.64265	0.000269844	0.00269397	0v8
TraesCS1D02G341200	87.8389	-2.6516	0.388437	-6.82631	8.71246634798374e-12	6.66486122387144e-10	0v8
TraesCS1D02G341900	1132.8	-0.468605	0.123484	-3.79487	0.00014772	0.00164344	0v8
TraesCS1D02G342100	25.8951	1.78903	0.483627	3.69919	0.000216292	0.00225336	0v8
TraesCS1D02G344000	569.277	0.499927	0.134411	3.71939	0.000199706	0.00211239	0v8
TraesCS1D02G344600	1023.39	-0.336848	0.13111	-2.56921	0.0101932	0.049418	0v8
TraesCS1D02G345100	219.886	0.54703	0.184427	2.9661	0.00301601	0.0190771	0v8
TraesCS1D02G345400	73.2377	1.27693	0.298423	4.27892	1.8780370531748e-05	0.000292411	0v8
TraesCS1D02G348400	168.103	0.767315	0.255576	3.0023	0.00267944	0.0173905	0v8
TraesCS1D02G352900	240.541	0.87162	0.175558	4.96487	6.87486841100085e-07	1.7001582560585e-05	0v8
TraesCS1D02G361000	149.344	-0.848324	0.218256	-3.88683	0.000101562	0.00120284	0v8
TraesCS1D02G361300	165.692	0.953634	0.202774	4.70295	2.56425814475083e-06	5.26652743050491e-05	0v8
TraesCS1D02G361700	95.2132	-0.769911	0.285892	-2.69301	0.00708095	0.0374319	0v8
TraesCS1D02G364200	12292.4	0.369393	0.131747	2.80381	0.00505024	0.0287212	0v8
TraesCS1D02G364600	30499.7	0.340919	0.125061	2.72602	0.00641032	0.0346288	0v8
TraesCS1D02G364900	2490.39	-0.512018	0.122743	-4.17146	3.02653556293813e-05	0.000438821	0v8
TraesCS1D02G365800	683.384	0.576841	0.146081	3.94877	7.85553987343025e-05	0.000973037	0v8
TraesCS1D02G366400	21218.7	0.322375	0.125122	2.57648	0.00998112	0.0486037	0v8
TraesCS1D02G369000	23.4288	-1.71607	0.572679	-2.99656	0.00273045	0.0176568	0v8
TraesCS1D02G370300	170.121	-1.15934	0.225119	-5.14992	2.60597664166966e-07	7.24384860012353e-06	0v8
TraesCS1D02G370700	3777.32	0.654248	0.141373	4.62781	3.69555473123593e-06	7.22123110232477e-05	0v8
TraesCS1D02G372000	665.075	-0.468696	0.126276	-3.71169	0.000205877	0.00216462	0v8
TraesCS1D02G375100	323.323	0.594023	0.227716	2.60862	0.00909081	0.0453533	0v8
TraesCS1D02G375700	4993.58	-1.39057	0.162116	-8.5776	9.68704619212899e-18	2.01213788047936e-15	0v8
TraesCS1D02G376200	134.86	1.14565	0.21904	5.23033	1.69207500444807e-07	4.95102194025967e-06	0v8
TraesCS1D02G378100	141.936	0.635627	0.229322	2.77176	0.00557541	0.0310966	0v8
TraesCS1D02G378900	14.757	-3.56908	0.83797	-4.2592	2.05157152742133e-05	0.000314848	0v8
TraesCS1D02G379900	37.742	-1.06102	0.395688	-2.68144	0.00733056	0.0384468	0v8
TraesCS1D02G380700	16.5967	1.76095	0.623389	2.8248	0.00473096	0.0272636	0v8
TraesCS1D02G381700	143.076	0.704016	0.219597	3.20595	0.00134618	0.0100443	0v8
TraesCS1D02G382000	281.234	0.480817	0.183728	2.61701	0.00887037	0.0445254	0v8
TraesCS1D02G382900	272.442	0.518241	0.175537	2.95232	0.00315396	0.0197778	0v8
TraesCS1D02G383300	722.408	0.356622	0.126716	2.81433	0.00488788	0.0279859	0v8
TraesCS1D02G386800	96.9457	-0.981701	0.320465	-3.06337	0.00218861	0.0148084	0v8
TraesCS1D02G387600	310.79	-0.823082	0.205616	-4.003	6.25437075901082e-05	0.000804949	0v8
TraesCS1D02G388600	40.3611	-1.73567	0.422977	-4.10345	4.07030794278754e-05	0.000561857	0v8
TraesCS1D02G389000	575.274	-0.508015	0.13032	-3.89821	9.69063688325782e-05	0.00115956	0v8
TraesCS1D02G389300	38.8209	-1.11436	0.431897	-2.58016	0.00987559	0.0482229	0v8
TraesCS1D02G393600	153.711	-1.68062	0.304274	-5.52337	3.32559596349942e-08	1.15907341552673e-06	0v8
TraesCS1D02G395200	93.1439	-0.873989	0.302859	-2.88579	0.00390429	0.0234265	0v8
TraesCS1D02G395700	457.194	-0.461526	0.169271	-2.72655	0.0064	0.03459	0v8
TraesCS1D02G396600	12808.5	0.305445	0.115174	2.65203	0.0080009	0.0411257	0v8
TraesCS1D02G397200	49.5217	-1.23993	0.419385	-2.95654	0.00311107	0.0195597	0v8
TraesCS1D02G400200	50.891	-1.6802	0.424135	-3.96148	7.44854052138786e-05	0.000931166	0v8
TraesCS1D02G400600	776.469	-0.397184	0.127883	-3.10583	0.00189744	0.0132475	0v8
TraesCS1D02G405000	112.198	0.780578	0.232884	3.35179	0.000802915	0.00659188	0v8
TraesCS1D02G406100	147.08	1.23575	0.207092	5.96715	2.41426822292376e-09	1.07207121260074e-07	0v8
TraesCS1D02G408400	76.6883	-0.842528	0.296198	-2.84448	0.00444844	0.0259921	0v8
TraesCS1D02G408600	19.7758	-1.64129	0.563405	-2.91316	0.00357792	0.0218537	0v8
TraesCS1D02G409500	128.416	0.884464	0.267048	3.31201	0.000926296	0.00741947	0v8
TraesCS1D02G410200	597.313	-0.424529	0.137222	-3.09375	0.00197645	0.0136746	0v8
TraesCS1D02G411200	653.501	-0.365708	0.13853	-2.63992	0.00829252	0.0422912	0v8
TraesCS1D02G415800	720.809	0.438043	0.126775	3.45529	0.0005497	0.00484478	0v8
TraesCS1D02G416900	171.661	0.856429	0.248208	3.45045	0.000559654	0.00491874	0v8
TraesCS1D02G419800	8030.21	-0.306436	0.102545	-2.98832	0.00280516	0.0180392	0v8
TraesCS1D02G419900	377.718	0.821466	0.17512	4.69089	2.72021120891003e-06	5.54864377023209e-05	0v8
TraesCS1D02G421100	986.323	-0.973614	0.160693	-6.05885	1.37102306198645e-09	6.40405549859998e-08	0v8
TraesCS1D02G422000	30.4606	-1.40122	0.432489	-3.2399	0.00119571	0.00913429	0v8
TraesCS1D02G424300	667.395	0.550675	0.138017	3.98991	6.60989603541348e-05	0.000841537	0v8
TraesCS1D02G425500	122.948	1.27176	0.247456	5.13935	2.75695594091978e-07	7.59280930479829e-06	0v8
TraesCS1D02G426000	1039.14	-0.714511	0.118926	-6.00803	1.87795942660927e-09	8.55353953777554e-08	0v8
TraesCS1D02G427500	127.757	0.617026	0.235399	2.62119	0.00876238	0.0440876	0v8
TraesCS1D02G430200	160.505	0.813924	0.228788	3.55755	0.000374331	0.00354193	0v8
TraesCS1D02G433300	371.25	-0.89427	0.181942	-4.91514	8.87207821272563e-07	2.12907349611011e-05	0v8
TraesCS1D02G434000	1904.53	-0.423674	0.113291	-3.73969	0.000184244	0.00197313	0v8
TraesCS1D02G434200	269.445	0.444284	0.163563	2.71629	0.00660175	0.0354138	0v8
TraesCS1D02G435700	187.944	0.739988	0.23773	3.11273	0.00185365	0.013022	0v8
TraesCS1D02G436800	843.416	-0.407074	0.127986	-3.18062	0.00146963	0.0107601	0v8
TraesCS1D02G437000	339.931	-0.463348	0.168579	-2.74855	0.00598594	0.0328833	0v8
TraesCS1D02G437400	85.7638	-0.942463	0.334905	-2.81412	0.00489111	0.0280015	0v8
TraesCS1D02G437500	40.2127	-1.53985	0.404469	-3.8071	0.000140609	0.00157919	0v8
TraesCS1D02G437700	361.336	-0.634785	0.15858	-4.00293	6.25636756407345e-05	0.000804955	0v8
TraesCS1D02G439600	637.291	0.476532	0.154519	3.08398	0.00204254	0.0140393	0v8
TraesCS1D02G440500	33.924	-1.89375	0.479732	-3.94752	7.89634259632341e-05	0.000977365	0v8
TraesCS1D02G444400	256.257	-0.509088	0.178905	-2.84558	0.00443301	0.0259233	0v8
TraesCS1D02G445000	20.0607	-1.52163	0.569426	-2.67222	0.00753509	0.0392814	0v8
TraesCS1D02G445100	70.795	-0.822169	0.314119	-2.61738	0.00886074	0.0444889	0v8
TraesCS1D02G445600	44.1084	-0.996741	0.36424	-2.7365	0.00620974	0.0337806	0v8
TraesCS1D02G447000	1926.35	0.471494	0.124967	3.77293	0.00016134	0.00176621	0v8
TraesCS1D02G449200	1563.04	-0.351344	0.111385	-3.15432	0.00160873	0.011615	0v8
TraesCS1D02G450100	24.1418	-2.59553	0.599489	-4.32957	1.49398782835444e-05	0.00024083	0v8
TraesCS1D02G450900	235.433	0.605226	0.182739	3.31198	0.000926387	0.00741947	0v8
TraesCS1D02G451000	256.965	0.657522	0.169645	3.87586	0.000106248	0.00124817	0v8
TraesCS1D02G451300	2833.64	-0.362502	0.116681	-3.10678	0.00189138	0.0132152	0v8
TraesCS1D02G452200	1654.6	-0.491133	0.118498	-4.14465	3.40326119651758e-05	0.00048386	0v8
TraesCS1D02G453600	5268.95	0.321603	0.107922	2.97995	0.00288291	0.0184097	0v8
TraesCS1D02G453700	64.8669	-1.12828	0.310027	-3.63931	0.000273365	0.00272433	0v8
TraesCS1D02G454500	445.083	0.523726	0.147891	3.5413	0.000398154	0.00371898	0v8
TraesCS2A02G001200	566.978	-0.391401	0.14166	-2.76297	0.00572784	0.0317983	0v8
TraesCS2A02G002500	978.993	0.420122	0.124902	3.36361	0.000769295	0.00637214	0v8
TraesCS2A02G007000	106.563	-1.12647	0.323819	-3.47871	0.000503829	0.00450562	0v8
TraesCS2A02G007300	1578.5	-0.381245	0.147328	-2.58773	0.00966119	0.0474738	0v8
TraesCS2A02G007900	1028.84	-0.333736	0.121495	-2.74692	0.00601584	0.0329971	0v8
TraesCS2A02G009100	26.5119	1.9448	0.54729	3.55351	0.000380125	0.00358264	0v8
TraesCS2A02G010100	1764.8	-0.39546	0.115457	-3.42516	0.000614436	0.0053171	0v8
TraesCS2A02G011100	376.117	0.400502	0.153446	2.61005	0.00905303	0.0452061	0v8
TraesCS2A02G013500	149.358	-0.983097	0.225822	-4.35342	1.34028425003727e-05	0.000219596	0v8
TraesCS2A02G017000	192.391	-0.75054	0.186779	-4.01833	5.86130448893222e-05	0.000762669	0v8
TraesCS2A02G017600	60.5012	-1.17072	0.381699	-3.06713	0.00216128	0.0146705	0v8
TraesCS2A02G027000	467.59	0.491219	0.171538	2.86361	0.00418838	0.0247898	0v8
TraesCS2A02G028800	170.156	0.725879	0.204274	3.55345	0.000380212	0.00358264	0v8
TraesCS2A02G031200	28.6585	1.2983	0.469452	2.76556	0.0056826	0.0315888	0v8
TraesCS2A02G032400	156.932	0.960099	0.210365	4.56397	5.01944922827528e-06	9.40365184354196e-05	0v8
TraesCS2A02G033700	296.76	2.04656	0.220733	9.27168	1.83237950792599e-20	5.35602641115729e-18	0v8
TraesCS2A02G034800	122.235	0.793712	0.219354	3.61841	0.000296421	0.00291163	0v8
TraesCS2A02G037400	1180.24	-0.452391	0.117804	-3.84021	0.00012293	0.00140565	0v8
TraesCS2A02G038200	196.908	-0.68154	0.191084	-3.5667	0.000361501	0.00343717	0v8
TraesCS2A02G039500	276.725	0.434093	0.166233	2.61135	0.00901858	0.0450897	0v8
TraesCS2A02G040000	321.09	0.546385	0.195446	2.79558	0.00518068	0.0293394	0v8
TraesCS2A02G040100	1604.75	-0.445388	0.125611	-3.54576	0.000391485	0.00366692	0v8
TraesCS2A02G041400	1584.94	-0.466017	0.136265	-3.41992	0.000626389	0.0054064	0v8
TraesCS2A02G042400	527.343	0.506387	0.170075	2.97744	0.00290666	0.0185322	0v8
TraesCS2A02G045000	115.05	0.7269	0.238899	3.04271	0.00234458	0.0156611	0v8
TraesCS2A02G046100	403.368	-0.655665	0.181521	-3.61206	0.000303774	0.00297407	0v8
TraesCS2A02G048600	8.67185	-2.35985	0.911914	-2.5878	0.00965902	0.0474672	0v8
TraesCS2A02G050700	169.663	0.951576	0.203712	4.67118	2.99475426935162e-06	6.04128550686065e-05	0v8
TraesCS2A02G052200	40.7856	1.45292	0.407217	3.56792	0.000359827	0.0034258	0v8
TraesCS2A02G052400	491.679	0.60887	0.153225	3.97369	7.07685946937738e-05	0.000892572	0v8
TraesCS2A02G059900	659.728	0.568688	0.146532	3.88099	0.000104031	0.00122543	0v8
TraesCS2A02G061600	16.2663	-2.19383	0.698978	-3.13862	0.00169746	0.0121428	0v8
TraesCS2A02G066200	7916.56	-0.3913	0.103624	-3.77616	0.000159264	0.00174923	0v8
TraesCS2A02G066800	33.9435	1.24422	0.47311	2.62987	0.0085417	0.0432406	0v8
TraesCS2A02G067400	1498.53	0.674005	0.148894	4.52673	5.9902068826647e-06	0.000109787	0v8
TraesCS2A02G070200	22.1635	-1.6295	0.533326	-3.05535	0.00224794	0.0151348	0v8
TraesCS2A02G070600	124.632	-0.724034	0.248348	-2.91539	0.00355239	0.0217282	0v8
TraesCS2A02G070700	401.663	-0.894383	0.15285	-5.85136	4.87557905086551e-09	2.0404028461873e-07	0v8
TraesCS2A02G075800	820.864	0.399857	0.134742	2.96759	0.00300149	0.0189979	0v8
TraesCS2A02G082600	127.342	-0.579219	0.221619	-2.61358	0.00895994	0.0448677	0v8
TraesCS2A02G084200	746.621	0.480848	0.1694	2.83853	0.00453212	0.0263561	0v8
TraesCS2A02G086000	40.4156	2.54621	0.455878	5.58529	2.333119858065e-08	8.41080067841283e-07	0v8
TraesCS2A02G088800	656.993	-0.385964	0.133156	-2.89859	0.00374844	0.0226851	0v8
TraesCS2A02G090100	307.106	0.537407	0.208384	2.57893	0.00991074	0.0483564	0v8
TraesCS2A02G091900	105.321	0.845238	0.244203	3.4612	0.000537765	0.00475585	0v8
TraesCS2A02G095600	101.098	0.794958	0.273291	2.90884	0.00362776	0.0220843	0v8
TraesCS2A02G096400	287.926	-0.663546	0.177746	-3.73312	0.000189123	0.00201587	0v8
TraesCS2A02G096500	149.729	0.733364	0.216016	3.39496	0.000686397	0.00580158	0v8
TraesCS2A02G097700	204.428	0.669547	0.191346	3.49915	0.000466752	0.00423144	0v8
TraesCS2A02G097800	1530.43	-0.326168	0.12088	-2.69828	0.00696987	0.036993	0v8
TraesCS2A02G098400	95.9304	1.26807	0.252282	5.02638	4.99825359013329e-07	1.29243487497537e-05	0v8
TraesCS2A02G099200	190.956	0.539972	0.205657	2.6256	0.00864969	0.0436534	0v8
TraesCS2A02G099900	319.551	-1.07457	0.210525	-5.10425	3.32103910291941e-07	9.00635310235045e-06	0v8
TraesCS2A02G100400	105.253	0.641634	0.240707	2.66562	0.00768469	0.039854	0v8
TraesCS2A02G100700	12.4129	-2.13081	0.724053	-2.94289	0.00325162	0.0202511	0v8
TraesCS2A02G102200	397.786	0.511183	0.185013	2.76295	0.00572814	0.0317983	0v8
TraesCS2A02G104500	309.786	-0.609077	0.18192	-3.34805	0.000813831	0.00666509	0v8
TraesCS2A02G105600	525.517	0.401432	0.134138	2.99267	0.00276544	0.0178485	0v8
TraesCS2A02G107300	21.9585	-2.03892	0.64213	-3.17525	0.00149709	0.0109273	0v8
TraesCS2A02G112500	11.4174	-2.79135	0.837459	-3.33312	0.000858775	0.00696976	0v8
TraesCS2A02G114000	317.562	-0.487408	0.175764	-2.77308	0.00555288	0.0309862	0v8
TraesCS2A02G114100	1140.82	-0.332041	0.120115	-2.76436	0.00570349	0.0316832	0v8
TraesCS2A02G114900	2263.26	0.55765	0.117262	4.7556	1.97853977869142e-06	4.23697419525964e-05	0v8
TraesCS2A02G116000	133.419	-1.28192	0.23857	-5.37336	7.72836566779287e-08	2.47595877716306e-06	0v8
TraesCS2A02G117400	122.156	0.721953	0.242628	2.97555	0.0029246	0.0186131	0v8
TraesCS2A02G117500	63.637	-0.977411	0.345242	-2.83109	0.00463894	0.0268479	0v8
TraesCS2A02G117700	342.484	-0.694334	0.161487	-4.29963	1.7108639303977e-05	0.000269564	0v8
TraesCS2A02G118700	469.697	-0.387508	0.142368	-2.72186	0.00649149	0.0349479	0v8
TraesCS2A02G119000	23.6767	1.28204	0.495382	2.58798	0.00965394	0.0474467	0v8
TraesCS2A02G119300	1286.93	0.486325	0.155872	3.12003	0.00180831	0.0127563	0v8
TraesCS2A02G119400	4160.14	-0.387863	0.11775	-3.29396	0.000987878	0.00781837	0v8
TraesCS2A02G120700	54.7523	-1.07943	0.332766	-3.24379	0.00117949	0.00904297	0v8
TraesCS2A02G122000	267.204	-0.467818	0.175593	-2.66421	0.00771692	0.0399813	0v8
TraesCS2A02G123400	236.85	-0.798813	0.197881	-4.03683	5.41788821838962e-05	0.000713817	0v8
TraesCS2A02G123500	5.99745	3.47769	1.18067	2.94553	0.00322404	0.0201258	0v8
TraesCS2A02G125500	2880	-0.507888	0.118361	-4.291	1.77868445287558e-05	0.000279087	0v8
TraesCS2A02G126100	208.557	0.609506	0.20384	2.99012	0.00278864	0.0179554	0v8
TraesCS2A02G127400	22.551	1.43391	0.506404	2.83155	0.00463226	0.0268175	0v8
TraesCS2A02G128300	455.658	0.446862	0.150578	2.96765	0.00300089	0.0189962	0v8
TraesCS2A02G129000	969.092	0.660995	0.125183	5.28022	1.29026592881353e-07	3.91470410697164e-06	0v8
TraesCS2A02G129600	48.5324	-1.91672	0.396383	-4.83554	1.32784652693457e-06	3.0122689433178e-05	0v8
TraesCS2A02G131300	232.618	0.531001	0.175386	3.02761	0.00246495	0.0162816	0v8
TraesCS2A02G131500	525.637	0.491096	0.139457	3.52149	0.000429131	0.00394781	0v8
TraesCS2A02G132200	149.053	-0.584872	0.22081	-2.64876	0.00807867	0.0414503	0v8
TraesCS2A02G140100	485.101	-0.356335	0.13721	-2.59701	0.00940397	0.0465121	0v8
TraesCS2A02G141900	826.526	-0.581356	0.154039	-3.77408	0.000160598	0.00175911	0v8
TraesCS2A02G143200	15.1932	-2.48958	0.652814	-3.81361	0.000136949	0.00154452	0v8
TraesCS2A02G143900	46.7681	1.92752	0.388448	4.96211	6.97321125918421e-07	1.72072636058877e-05	0v8
TraesCS2A02G145500	1025.25	-0.548055	0.117401	-4.66822	3.03823903055598e-06	6.12029777856865e-05	0v8
TraesCS2A02G146600	564.718	0.390357	0.141977	2.74944	0.00596969	0.0328231	0v8
TraesCS2A02G149300	379.998	-0.859987	0.163006	-5.27581	1.32171607948826e-07	3.99516162065359e-06	0v8
TraesCS2A02G149700	1300.46	-0.337781	0.11736	-2.87816	0.00400008	0.0238652	0v8
TraesCS2A02G150200	80.7888	1.31337	0.343105	3.82788	0.00012925	0.00147056	0v8
TraesCS2A02G151800	1721.15	-0.376332	0.135199	-2.78353	0.00537701	0.0302429	0v8
TraesCS2A02G151900	1850.97	-0.342137	0.111941	-3.0564	0.0022401	0.0151007	0v8
TraesCS2A02G152400	20.9828	-2.07559	0.559616	-3.70895	0.000208122	0.00218308	0v8
TraesCS2A02G152900	31.7426	-1.73045	0.442848	-3.90754	9.32407705203123e-05	0.00112376	0v8
TraesCS2A02G153200	322.724	0.805565	0.170463	4.72574	2.292816268781e-06	4.78177415731871e-05	0v8
TraesCS2A02G153700	189.7	-0.58153	0.198536	-2.92909	0.00339953	0.0209765	0v8
TraesCS2A02G155100	303.626	0.657856	0.176633	3.72443	0.000195758	0.00207683	0v8
TraesCS2A02G156800	49.0682	1.08034	0.385922	2.79938	0.00512008	0.0290381	0v8
TraesCS2A02G157100	166.579	-0.54727	0.198886	-2.75168	0.00592911	0.0326538	0v8
TraesCS2A02G157600	166.351	-0.759438	0.242171	-3.13596	0.00171294	0.0122366	0v8
TraesCS2A02G159700	1321	0.309605	0.114253	2.70981	0.00673211	0.0359769	0v8
TraesCS2A02G159800	80.0597	0.855482	0.280609	3.04866	0.00229862	0.0154231	0v8
TraesCS2A02G161300	395.208	-0.512103	0.162849	-3.14466	0.00166282	0.0119402	0v8
TraesCS2A02G162100	3017.64	0.393161	0.115324	3.40919	0.000651559	0.00557359	0v8
TraesCS2A02G162900	102.436	0.681672	0.251467	2.71078	0.00671246	0.0358888	0v8
TraesCS2A02G163700	5269.97	-0.339373	0.112599	-3.01399	0.00257836	0.0168696	0v8
TraesCS2A02G164100	345.702	0.79674	0.170599	4.67026	3.00822185037372e-06	6.06413893520414e-05	0v8
TraesCS2A02G164600	193.323	-0.73903	0.228889	-3.22877	0.00124325	0.00942223	0v8
TraesCS2A02G164800	379.3	0.439774	0.16248	2.70663	0.00679692	0.0362618	0v8
TraesCS2A02G168300	5063.08	-0.363444	0.117138	-3.1027	0.00191763	0.0133572	0v8
TraesCS2A02G169100	517.121	0.450896	0.155827	2.89358	0.00380881	0.0229768	0v8
TraesCS2A02G171800	4979.43	-0.387833	0.109187	-3.552	0.000382322	0.00359753	0v8
TraesCS2A02G173800	11.3294	-1.81577	0.706931	-2.56853	0.0102132	0.0494905	0v8
TraesCS2A02G175400	400.986	-0.501983	0.178391	-2.81395	0.00489365	0.028011	0v8
TraesCS2A02G176100	707.825	0.735003	0.126653	5.80328	6.50307295459606e-09	2.66447438557315e-07	0v8
TraesCS2A02G176300	561.883	-0.955205	0.207477	-4.60391	4.14627897544756e-06	7.97013205361795e-05	0v8
TraesCS2A02G176500	247.283	0.540323	0.201897	2.67623	0.00744549	0.0389234	0v8
TraesCS2A02G180200	312.841	-0.659073	0.185281	-3.55715	0.000374904	0.00354677	0v8
TraesCS2A02G184700	2141.76	0.3537	0.109689	3.22458	0.00126156	0.0095333	0v8
TraesCS2A02G185000	168.155	0.722259	0.224088	3.2231	0.00126813	0.00956891	0v8
TraesCS2A02G188000	616.147	-0.69967	0.135457	-5.16527	2.40089545652965e-07	6.73319375657618e-06	0v8
TraesCS2A02G188500	149.038	-1.50774	0.217418	-6.93475	4.06940787085942e-12	3.34998769368546e-10	0v8
TraesCS2A02G189100	35.4395	-1.74346	0.419853	-4.15255	3.2879202340616e-05	0.00047009	0v8
TraesCS2A02G190100	564.282	0.440776	0.152134	2.89728	0.00376418	0.0227657	0v8
TraesCS2A02G190900	1769.62	0.33582	0.11254	2.98401	0.00284502	0.0182335	0v8
TraesCS2A02G191339	61.2282	1.47137	0.457483	3.21623	0.00129887	0.00975547	0v8
TraesCS2A02G192800	568.651	-0.607481	0.157325	-3.86131	0.000112781	0.00131267	0v8
TraesCS2A02G192900	519.762	-0.504963	0.13558	-3.72445	0.000195738	0.00207683	0v8
TraesCS2A02G193300	594.663	-0.4949	0.130027	-3.80615	0.000141149	0.00158401	0v8
TraesCS2A02G194000	58.6417	-1.05932	0.365074	-2.90165	0.00371203	0.0225031	0v8
TraesCS2A02G195000	80.0534	1.60157	0.340657	4.7014	2.58384736272368e-06	5.29908313022095e-05	0v8
TraesCS2A02G195100	34.1725	2.30057	0.515767	4.46048	8.17744977238003e-06	0.00014343	0v8
TraesCS2A02G195200	22.7274	1.68213	0.545933	3.0812	0.00206167	0.0141413	0v8
TraesCS2A02G195400	107.228	1.75365	0.3096	5.66424	1.47675283289317e-08	5.58881397981544e-07	0v8
TraesCS2A02G195500	421.127	0.622462	0.204234	3.04779	0.00230528	0.0154556	0v8
TraesCS2A02G196200	44.7385	-0.973018	0.371063	-2.62225	0.00873518	0.0439753	0v8
TraesCS2A02G197300	86.9236	0.736703	0.274576	2.68306	0.00729522	0.0383004	0v8
TraesCS2A02G198000	2149.01	-0.718139	0.118075	-6.08207	1.18637496734052e-09	5.65808064743577e-08	0v8
TraesCS2A02G198500	3865.45	-0.325752	0.121321	-2.68505	0.00725181	0.0381148	0v8
TraesCS2A02G199300	331.991	-0.875439	0.194608	-4.49847	6.8443485632437e-06	0.000122666	0v8
TraesCS2A02G201200	181.071	-0.531456	0.1972	-2.695	0.00703877	0.0372611	0v8
TraesCS2A02G203200	141.634	-1.13973	0.293259	-3.88643	0.000101728	0.0012043	0v8
TraesCS2A02G203400	468.327	-0.865471	0.225516	-3.83774	0.000124173	0.00141792	0v8
TraesCS2A02G203900	404.886	0.784987	0.215006	3.651	0.000261222	0.00262314	0v8
TraesCS2A02G204200	131.895	-0.630351	0.238574	-2.64217	0.00823778	0.0420763	0v8
TraesCS2A02G204300	992.121	0.467333	0.135063	3.4601	0.000539967	0.00477086	0v8
TraesCS2A02G205100	122.866	1.15414	0.240365	4.80161	1.57398933059625e-06	3.48242836444755e-05	0v8
TraesCS2A02G205300	85.833	-0.778457	0.276387	-2.81654	0.00485437	0.0278418	0v8
TraesCS2A02G205900	13.9298	3.23812	0.80948	4.00025	6.32766643876355e-05	0.000812363	0v8
TraesCS2A02G207700	305.662	0.712355	0.182756	3.89785	9.70490821443481e-05	0.00116078	0v8
TraesCS2A02G209000	90.4439	0.982496	0.300187	3.27295	0.00106433	0.00831548	0v8
TraesCS2A02G212100	1259.2	-0.790182	0.118307	-6.67906	2.40475358787239e-11	1.6650055794126e-09	0v8
TraesCS2A02G213200	448.009	-0.601587	0.178719	-3.3661	0.000762379	0.00632593	0v8
TraesCS2A02G214500	4017.74	0.358941	0.138005	2.60093	0.00929705	0.0461362	0v8
TraesCS2A02G214800	31.9558	-1.91512	0.504804	-3.79379	0.000148365	0.00164868	0v8
TraesCS2A02G220400	1116.48	-1.05621	0.353345	-2.98917	0.00279733	0.0180031	0v8
TraesCS2A02G221700	94.5098	1.46061	0.27691	5.27469	1.3297732476382e-07	4.01737462869323e-06	0v8
TraesCS2A02G221900	3897.13	0.392371	0.111373	3.52305	0.000426609	0.00392907	0v8
TraesCS2A02G222300	259.943	-0.965217	0.184335	-5.23621	1.63910607347994e-07	4.79851053189229e-06	0v8
TraesCS2A02G223600	438.591	-0.498797	0.175705	-2.83884	0.00452784	0.0263393	0v8
TraesCS2A02G224300	229.035	0.510626	0.197658	2.58338	0.00978387	0.0479105	0v8
TraesCS2A02G226000	482.493	0.372592	0.141336	2.63622	0.00838365	0.0426409	0v8
TraesCS2A02G232800	474.533	-0.431809	0.150408	-2.87092	0.00409274	0.024312	0v8
TraesCS2A02G233100	625.063	-0.569563	0.156728	-3.63407	0.00027898	0.00277104	0v8
TraesCS2A02G233800	363.558	0.401783	0.154214	2.60536	0.00917787	0.0456647	0v8
TraesCS2A02G234900	103.369	-1.04158	0.253394	-4.11051	3.94785206132337e-05	0.000547888	0v8
TraesCS2A02G235500	462.581	-0.620218	0.150519	-4.12052	3.7801432618131e-05	0.000528386	0v8
TraesCS2A02G236600	1531.93	-0.493999	0.110977	-4.45137	8.53234336779929e-06	0.000149056	0v8
TraesCS2A02G238400	439.934	-0.583491	0.17716	-3.29359	0.000989168	0.00782384	0v8
TraesCS2A02G239500	168.027	-0.669756	0.19591	-3.4187	0.000629205	0.00542492	0v8
TraesCS2A02G242700	159.75	0.632464	0.204915	3.08647	0.00202551	0.0139503	0v8
TraesCS2A02G245900	8757.11	-0.535917	0.113507	-4.72143	2.3419767254081e-06	4.86640279190149e-05	0v8
TraesCS2A02G246400	189.733	-0.692466	0.201597	-3.43491	0.00059276	0.00516647	0v8
TraesCS2A02G247300	7175.14	-0.398196	0.119167	-3.3415	0.000833272	0.00679585	0v8
TraesCS2A02G249300	184.414	-0.520185	0.193726	-2.68516	0.00724958	0.0381102	0v8
TraesCS2A02G250800	392.694	-0.638399	0.154985	-4.11912	3.80326244308262e-05	0.000531201	0v8
TraesCS2A02G251100	936.118	-0.517568	0.129284	-4.00335	6.24515634218579e-05	0.00080431	0v8
TraesCS2A02G251700	207.035	1.18244	0.290596	4.069	4.72151675136431e-05	0.000637472	0v8
TraesCS2A02G253500	2231.96	0.352287	0.116397	3.0266	0.00247325	0.016325	0v8
TraesCS2A02G254800	232.526	-0.465261	0.178863	-2.60121	0.00928944	0.0461187	0v8
TraesCS2A02G255100	169.224	-0.768598	0.240226	-3.19948	0.00137677	0.0102281	0v8
TraesCS2A02G255900	18.5759	-1.88783	0.557177	-3.38821	0.000703498	0.00592581	0v8
TraesCS2A02G257000	1313.47	-0.319492	0.116708	-2.73753	0.00619026	0.0336941	0v8
TraesCS2A02G258600	23.0663	-2.42637	0.561153	-4.32391	1.5329018377282e-05	0.000245679	0v8
TraesCS2A02G258700	130.557	-1.10243	0.284055	-3.88103	0.000104014	0.00122543	0v8
TraesCS2A02G259400	654.748	-0.417899	0.136036	-3.07197	0.00212654	0.0144941	0v8
TraesCS2A02G260600	147.18	1.02764	0.220019	4.67071	3.00154996541572e-06	6.05284112158121e-05	0v8
TraesCS2A02G261900	44.9774	-1.46829	0.461385	-3.18235	0.00146086	0.010718	0v8
TraesCS2A02G262400	2090.81	-0.444417	0.130436	-3.40715	0.000656452	0.00559939	0v8
TraesCS2A02G262700	154.664	-0.740129	0.232312	-3.18592	0.00144292	0.010618	0v8
TraesCS2A02G263700	216.811	0.634342	0.208277	3.04567	0.00232163	0.0155413	0v8
TraesCS2A02G264000	10.2566	-3.00693	0.896747	-3.35316	0.000798953	0.00656544	0v8
TraesCS2A02G264500	44.6106	-1.30051	0.363855	-3.57424	0.00035124	0.00335876	0v8
TraesCS2A02G265100	87.0122	1.05895	0.28042	3.77631	0.000159169	0.00174885	0v8
TraesCS2A02G268100	10.6914	-2.11805	0.785908	-2.69503	0.00703813	0.0372611	0v8
TraesCS2A02G270200	201.315	1.31799	0.206237	6.39067	1.65165203530265e-10	9.58634394205443e-09	0v8
TraesCS2A02G270900	161.04	1.04343	0.237253	4.39795	1.09276527509107e-05	0.000183986	0v8
TraesCS2A02G273400	92.5831	0.934698	0.249078	3.75263	0.000174989	0.00189116	0v8
TraesCS2A02G273900	230.712	-0.644199	0.196705	-3.27496	0.00105678	0.00826104	0v8
TraesCS2A02G274800	874.116	-0.391685	0.133004	-2.94492	0.00323037	0.020152	0v8
TraesCS2A02G274900	1435.15	-0.527192	0.138961	-3.79382	0.000148348	0.00164868	0v8
TraesCS2A02G275800	2105.41	-0.443488	0.122293	-3.62642	0.000287375	0.00284098	0v8
TraesCS2A02G276100	19737.6	-0.343724	0.113902	-3.01773	0.00254679	0.0167074	0v8
TraesCS2A02G277100	181.125	0.847688	0.226974	3.73474	0.000187907	0.00200743	0v8
TraesCS2A02G277900	330.96	-0.464849	0.159368	-2.91682	0.00353617	0.0216477	0v8
TraesCS2A02G278900	922.177	-0.336577	0.13065	-2.57617	0.00999013	0.0486183	0v8
TraesCS2A02G282700	406.937	-1.18227	0.226856	-5.21156	1.87259558745199e-07	5.41220210917698e-06	0v8
TraesCS2A02G282900	1430.3	-0.314503	0.121931	-2.57936	0.00989843	0.0483172	0v8
TraesCS2A02G285200	285.971	0.521981	0.182392	2.86187	0.00421148	0.024888	0v8
TraesCS2A02G285700	622.808	-0.44947	0.133715	-3.36141	0.000775452	0.00641564	0v8
TraesCS2A02G286300	166.555	0.577761	0.200271	2.8849	0.00391544	0.0234827	0v8
TraesCS2A02G287300	3353.64	-0.318856	0.109903	-2.90125	0.00371677	0.0225294	0v8
TraesCS2A02G290800	83.8587	-5.87351	1.79061	-3.28017	0.00103744	0.00813904	0v8
TraesCS2A02G290900	353.117	-0.62558	0.15371	-4.06987	4.70398678495326e-05	0.000635559	0v8
TraesCS2A02G291200	856.696	-0.345979	0.130868	-2.64373	0.00819985	0.0419241	0v8
TraesCS2A02G291700	731.479	0.861938	0.126541	6.81155	9.65504809864998e-12	7.28537531672575e-10	0v8
TraesCS2A02G292100	972.702	0.409368	0.127678	3.20626	0.00134471	0.0100399	0v8
TraesCS2A02G293400	2242.94	-0.635793	0.159093	-3.99635	6.43252844734726e-05	0.000822835	0v8
TraesCS2A02G293700	4049.44	-0.400158	0.132724	-3.01496	0.0025701	0.0168291	0v8
TraesCS2A02G295000	350.677	0.654182	0.208937	3.131	0.00174213	0.0123905	0v8
TraesCS2A02G295600	5940.79	-0.371463	0.124423	-2.98548	0.00283132	0.01816	0v8
TraesCS2A02G297300	152.119	-1.09271	0.240273	-4.54777	5.42166451797739e-06	0.000100569	0v8
TraesCS2A02G298700	23.718	1.80469	0.498473	3.62044	0.0002941	0.00289385	0v8
TraesCS2A02G298800	783.875	-0.405493	0.122278	-3.31615	0.000912662	0.00733293	0v8
TraesCS2A02G299100	7513.49	0.387724	0.136736	2.83556	0.00457448	0.026548	0v8
TraesCS2A02G300700	326.771	0.711853	0.181582	3.92029	8.84413207781527e-05	0.00107644	0v8
TraesCS2A02G301600	101.443	1.1418	0.308852	3.69693	0.000218221	0.00226971	0v8
TraesCS2A02G304700	99.3967	-0.697587	0.271699	-2.5675	0.0102435	0.0495962	0v8
TraesCS2A02G305000	501.647	0.69368	0.145887	4.75492	1.98527364322894e-06	4.24612889289175e-05	0v8
TraesCS2A02G305300	26.3693	1.55387	0.563202	2.75899	0.00579798	0.0321137	0v8
TraesCS2A02G306300	62.0674	-1.57942	0.384591	-4.10677	4.01236476698372e-05	0.000555346	0v8
TraesCS2A02G308600	1074.05	-0.355929	0.126223	-2.81984	0.00480476	0.0276187	0v8
TraesCS2A02G309200	1227.13	-0.394278	0.132722	-2.9707	0.00297121	0.018861	0v8
TraesCS2A02G309300	1135.28	-0.353908	0.135512	-2.61163	0.00901114	0.0450604	0v8
TraesCS2A02G310800	109.982	1.20256	0.243965	4.92922	8.25570974187872e-07	2.00148899796056e-05	0v8
TraesCS2A02G311000	116.806	1.55097	0.285556	5.43141	5.59110517295846e-08	1.85192295524406e-06	0v8
TraesCS2A02G311200	256.151	-0.568341	0.187216	-3.03576	0.00239933	0.0159503	0v8
TraesCS2A02G311700	154.783	-0.917297	0.200997	-4.56374	5.02492607668274e-06	9.41028593475467e-05	0v8
TraesCS2A02G312000	21.6226	-2.84106	0.824601	-3.44537	0.000570282	0.0050013	0v8
TraesCS2A02G319000	71.9091	0.898925	0.312124	2.88003	0.00397637	0.0237566	0v8
TraesCS2A02G320300	317.551	-0.637512	0.181995	-3.5029	0.000460216	0.00418222	0v8
TraesCS2A02G320400	876.466	-0.849623	0.135729	-6.2597	3.85717412776267e-10	2.06539108676969e-08	0v8
TraesCS2A02G321500	721.087	0.510846	0.160149	3.18982	0.00142362	0.0105077	0v8
TraesCS2A02G323700	446.757	-0.382515	0.147756	-2.58882	0.00963043	0.0473637	0v8
TraesCS2A02G325400	844.717	-0.35715	0.122468	-2.91628	0.00354231	0.0216805	0v8
TraesCS2A02G325500	177.201	0.824255	0.196596	4.19264	2.75721821757446e-05	0.000406106	0v8
TraesCS2A02G325600	299.009	-0.442234	0.160848	-2.74939	0.00597065	0.0328232	0v8
TraesCS2A02G328500	10.5872	-2.28854	0.766173	-2.98697	0.00281755	0.0180983	0v8
TraesCS2A02G329300	16.3494	1.73108	0.602508	2.87313	0.00406431	0.0241786	0v8
TraesCS2A02G329700	471.713	0.413562	0.137816	3.00082	0.0026925	0.0174533	0v8
TraesCS2A02G330000	870.818	0.639292	0.137075	4.66382	3.10396177986411e-06	6.23722823107551e-05	0v8
TraesCS2A02G331100	21.0551	-1.57497	0.531797	-2.9616	0.00306046	0.0193022	0v8
TraesCS2A02G334100	481.329	0.397351	0.148821	2.67	0.00758523	0.0394649	0v8
TraesCS2A02G334600	954.829	-0.40813	0.131903	-3.09416	0.00197373	0.013659	0v8
TraesCS2A02G336400	190.615	0.586306	0.193387	3.03177	0.00243124	0.0161002	0v8
TraesCS2A02G337000	560.342	-0.412918	0.159532	-2.5883	0.00964503	0.0474272	0v8
TraesCS2A02G337200	285.03	0.82123	0.164748	4.98477	6.20341508984968e-07	1.55615119709704e-05	0v8
TraesCS2A02G337700	245.008	1.67339	0.648561	2.58015	0.00987572	0.0482229	0v8
TraesCS2A02G338200	291.813	-0.817553	0.192989	-4.23626	2.27269879933277e-05	0.000344864	0v8
TraesCS2A02G338600	35.6208	-1.16818	0.4135	-2.82509	0.0047267	0.0272473	0v8
TraesCS2A02G338900	252.636	0.472078	0.170802	2.7639	0.00571158	0.0317219	0v8
TraesCS2A02G339200	1465.14	-0.500142	0.135396	-3.69392	0.000220822	0.00229275	0v8
TraesCS2A02G343100	604.474	0.394655	0.137599	2.86815	0.00412883	0.024492	0v8
TraesCS2A02G343200	750.931	-0.392281	0.151785	-2.58446	0.0097533	0.047798	0v8
TraesCS2A02G343600	173.775	-0.972052	0.257207	-3.77926	0.000157297	0.00173063	0v8
TraesCS2A02G344400	68.3706	-0.995154	0.28536	-3.48737	0.000487803	0.00438999	0v8
TraesCS2A02G347600	174.829	0.683354	0.23319	2.93046	0.00338462	0.0208958	0v8
TraesCS2A02G348500	41.23	-1.17482	0.393277	-2.98725	0.00281501	0.0180881	0v8
TraesCS2A02G349100	68.8328	-1.31495	0.355069	-3.70336	0.00021276	0.00222228	0v8
TraesCS2A02G352600	506.907	-0.401249	0.154318	-2.60014	0.00931849	0.0462102	0v8
TraesCS2A02G353100	902.27	-0.476955	0.126194	-3.77954	0.00015712	0.00173003	0v8
TraesCS2A02G353400	3837.39	0.757624	0.1397	5.42321	5.85378642058569e-08	1.9276702251204e-06	0v8
TraesCS2A02G354900	2140.57	-0.394392	0.107959	-3.65317	0.000259025	0.00260523	0v8
TraesCS2A02G355500	80.2477	0.772584	0.274417	2.81537	0.00487217	0.0279156	0v8
TraesCS2A02G355600	36.0743	-1.36051	0.422001	-3.22394	0.00126441	0.00954848	0v8
TraesCS2A02G355800	36.1045	-2.23752	0.481522	-4.64676	3.37192934818108e-06	6.70201982537527e-05	0v8
TraesCS2A02G357100	299.827	0.906359	0.227092	3.99115	6.57543978485777e-05	0.000837903	0v8
TraesCS2A02G357200	234.487	-0.470134	0.179369	-2.62104	0.0087662	0.0440962	0v8
TraesCS2A02G358000	441.859	-0.540205	0.140399	-3.84764	0.000119263	0.00137486	0v8
TraesCS2A02G358200	185.908	0.738432	0.211645	3.48901	0.000484815	0.00436796	0v8
TraesCS2A02G359100	238.322	-0.636886	0.179121	-3.55562	0.000377084	0.00356089	0v8
TraesCS2A02G359800	101.027	0.738566	0.240899	3.06587	0.00217039	0.0147101	0v8
TraesCS2A02G359900	673.301	0.462906	0.127683	3.62544	0.000288466	0.00284979	0v8
TraesCS2A02G360500	99.6449	0.769355	0.252883	3.04234	0.00234746	0.0156728	0v8
TraesCS2A02G363500	471.25	-0.756383	0.148375	-5.09777	3.4367040938147e-07	9.27141032907993e-06	0v8
TraesCS2A02G363600	187.349	-0.769904	0.225858	-3.40879	0.00065251	0.00557835	0v8
TraesCS2A02G365200	196.166	0.750857	0.193363	3.88316	0.000103109	0.00121684	0v8
TraesCS2A02G365400	135.552	-0.767955	0.233272	-3.2921	0.000994432	0.00785598	0v8
TraesCS2A02G366000	927.07	0.750126	0.14171	5.29337	1.20083085818592e-07	3.67481460573614e-06	0v8
TraesCS2A02G369800	403.071	-0.851067	0.175059	-4.8616	1.16442031122175e-06	2.69288817977735e-05	0v8
TraesCS2A02G370000	106.278	0.954966	0.263975	3.61764	0.000297296	0.00291821	0v8
TraesCS2A02G372800	247.945	-0.677124	0.173844	-3.89501	9.81933648087541e-05	0.00117109	0v8
TraesCS2A02G373000	1592.18	-0.452198	0.137214	-3.29556	0.000982273	0.00777835	0v8
TraesCS2A02G373900	803.764	0.50178	0.148912	3.36964	0.000752673	0.00626281	0v8
TraesCS2A02G374100	1876.45	-0.448439	0.126243	-3.5522	0.000382025	0.00359614	0v8
TraesCS2A02G376000	602.56	-0.589204	0.150225	-3.92214	8.77660593929042e-05	0.00107006	0v8
TraesCS2A02G378600	81.0685	-1.07746	0.314186	-3.42936	0.000605001	0.00525105	0v8
TraesCS2A02G380500	147.545	-1.12215	0.279663	-4.01252	6.00743707992086e-05	0.000779181	0v8
TraesCS2A02G381200	61.9707	-1.73797	0.329907	-5.26805	1.37879043721341e-07	4.13680902289014e-06	0v8
TraesCS2A02G381700	130.009	0.692732	0.223296	3.10231	0.00192016	0.0133699	0v8
TraesCS2A02G381900	768.076	-0.439726	0.151901	-2.89483	0.00379369	0.0229027	0v8
TraesCS2A02G382000	2308.12	0.492626	0.122018	4.03731	5.40675883292122e-05	0.000713104	0v8
TraesCS2A02G382200	1352.27	0.560879	0.140118	4.00289	6.25725664221381e-05	0.000804955	0v8
TraesCS2A02G384200	48.7284	-1.45363	0.357042	-4.07131	4.67485695264104e-05	0.000632528	0v8
TraesCS2A02G385100	18.9989	1.76793	0.63222	2.79638	0.00516779	0.0292781	0v8
TraesCS2A02G386800	361.778	2.59816	0.190146	13.664	1.66492940975389e-42	2.55166181377039e-39	0v8
TraesCS2A02G387400	575.359	-0.452954	0.17096	-2.64948	0.00806158	0.0413851	0v8
TraesCS2A02G388300	2552.1	0.328013	0.110476	2.96909	0.00298685	0.018933	0v8
TraesCS2A02G389200	973.244	-0.400227	0.134734	-2.97049	0.00297325	0.0188677	0v8
TraesCS2A02G389300	558.757	-0.381649	0.142679	-2.67489	0.00747539	0.0390439	0v8
TraesCS2A02G389900	430.323	-0.657325	0.152062	-4.32273	1.54107219231976e-05	0.000246719	0v8
TraesCS2A02G390000	56.5238	1.28761	0.351212	3.66619	0.000246191	0.00250278	0v8
TraesCS2A02G390700	731.483	-0.501207	0.12569	-3.98765	6.67317609897475e-05	0.000847501	0v8
TraesCS2A02G392100	53.6152	0.910702	0.349459	2.60604	0.00915969	0.0455942	0v8
TraesCS2A02G395000	19.7495	-2.17024	0.793531	-2.73491	0.00623968	0.0338882	0v8
TraesCS2A02G396200	126.389	-0.726772	0.243367	-2.98633	0.00282351	0.0181243	0v8
TraesCS2A02G397000	101.048	-0.983544	0.261504	-3.7611	0.000169166	0.00183663	0v8
TraesCS2A02G399200	264.016	-1.40126	0.24196	-5.79131	6.98388821863558e-09	2.84298898295728e-07	0v8
TraesCS2A02G401200	49.2824	1.42995	0.352218	4.05985	4.91038995880744e-05	0.000657494	0v8
TraesCS2A02G404100	7662.54	-0.340274	0.111124	-3.06211	0.00219786	0.0148583	0v8
TraesCS2A02G404600	39.3197	-1.24372	0.395643	-3.14354	0.00166916	0.0119812	0v8
TraesCS2A02G405700	357.924	0.443935	0.17276	2.56966	0.01018	0.0493643	0v8
TraesCS2A02G406300	60.236	-1.11684	0.345693	-3.23072	0.00123478	0.00936968	0v8
TraesCS2A02G406700	118.388	-0.916603	0.25294	-3.6238	0.000290304	0.00286544	0v8
TraesCS2A02G406900	82.5897	1.03483	0.280825	3.68496	0.000228738	0.00235919	0v8
TraesCS2A02G407100	11.1194	-2.54241	0.821177	-3.09606	0.00196113	0.0135967	0v8
TraesCS2A02G407700	5895.4	-0.318934	0.114164	-2.79365	0.00521164	0.0294853	0v8
TraesCS2A02G412400	21.7991	-1.72174	0.580194	-2.96752	0.00300208	0.0189996	0v8
TraesCS2A02G413900	98.0063	0.983815	0.291244	3.37797	0.000730231	0.00611632	0v8
TraesCS2A02G415800	430.452	-1.26632	0.184179	-6.87548	6.17821866447924e-12	4.87262959093129e-10	0v8
TraesCS2A02G419100	78.4265	0.751259	0.279804	2.68495	0.00725417	0.0381202	0v8
TraesCS2A02G419500	138.272	-0.689871	0.21634	-3.18882	0.00142853	0.0105353	0v8
TraesCS2A02G421400	151.992	-1.11771	0.22439	-4.98109	6.32276003185683e-07	1.58155461123279e-05	0v8
TraesCS2A02G423400	336.333	0.458772	0.166272	2.75915	0.00579511	0.0321009	0v8
TraesCS2A02G423500	1228.91	-0.380807	0.118719	-3.20764	0.0013383	0.00999729	0v8
TraesCS2A02G424700	1958.75	-0.463887	0.111832	-4.14806	3.35300488445051e-05	0.000477727	0v8
TraesCS2A02G426000	2528.54	-0.493907	0.131275	-3.76239	0.000168298	0.00182896	0v8
TraesCS2A02G426900	982.14	-0.500778	0.14864	-3.36905	0.000754268	0.00627333	0v8
TraesCS2A02G428000	307.441	0.597292	0.177908	3.3573	0.000787077	0.00648502	0v8
TraesCS2A02G428100	352.765	0.740169	0.165877	4.46217	8.11340923726334e-06	0.000142483	0v8
TraesCS2A02G430500	260.555	-1.42479	0.179795	-7.9245	2.29061700134738e-15	3.25543177138859e-13	0v8
TraesCS2A02G431800	573.504	0.660661	0.142741	4.62841	3.68487153447141e-06	7.20283782260379e-05	0v8
TraesCS2A02G432300	21.3748	1.60165	0.535018	2.99363	0.00275676	0.0178006	0v8
TraesCS2A02G433000	838.601	0.708123	0.125795	5.62918	1.8106667149987e-08	6.69464242872895e-07	0v8
TraesCS2A02G436800	861.393	0.421884	0.157878	2.67221	0.00753527	0.0392814	0v8
TraesCS2A02G437500	1375.64	-0.49981	0.129468	-3.86048	0.000113163	0.00131632	0v8
TraesCS2A02G438400	317.092	0.510772	0.166262	3.07209	0.00212565	0.0144941	0v8
TraesCS2A02G440000	918.295	0.532257	0.128066	4.15613	3.23686942908605e-05	0.000463627	0v8
TraesCS2A02G442300	242.174	0.487918	0.174817	2.79101	0.00525434	0.0296795	0v8
TraesCS2A02G442500	99.9637	0.933025	0.350592	2.66129	0.0077843	0.0402495	0v8
TraesCS2A02G443300	1690.51	-0.65468	0.197161	-3.32053	0.000898469	0.00723393	0v8
TraesCS2A02G444900	114.143	0.863223	0.255857	3.37385	0.000741259	0.0061869	0v8
TraesCS2A02G446500	405.711	0.535027	0.153731	3.48028	0.000500892	0.00448431	0v8
TraesCS2A02G447700	535.013	-0.612143	0.147188	-4.15892	3.19753438725303e-05	0.000459036	0v8
TraesCS2A02G447900	66.3141	0.815533	0.295923	2.75589	0.00585319	0.0323626	0v8
TraesCS2A02G448600	650.643	0.393099	0.140331	2.80123	0.00509089	0.0289031	0v8
TraesCS2A02G450100	86.0743	0.679274	0.260202	2.61056	0.00903939	0.0451562	0v8
TraesCS2A02G450700	125.272	-0.88311	0.237964	-3.71111	0.000206353	0.00216734	0v8
TraesCS2A02G451900	236.469	0.771907	0.233446	3.30657	0.000944459	0.00753256	0v8
TraesCS2A02G456100	1507.8	-0.657164	0.126341	-5.20153	1.97659599883159e-07	5.686699782331e-06	0v8
TraesCS2A02G458800	379.982	0.668521	0.184298	3.6274	0.000286287	0.0028327	0v8
TraesCS2A02G461300	689.798	0.611761	0.196657	3.1108	0.00186582	0.0130795	0v8
TraesCS2A02G462600	1541.9	-0.522075	0.121225	-4.30668	1.65724209484294e-05	0.000262465	0v8
TraesCS2A02G464100	1199.62	-0.628022	0.12137	-5.17446	2.28571908395103e-07	6.43884681443253e-06	0v8
TraesCS2A02G464300	2918.39	-0.576216	0.17408	-3.31006	0.000932765	0.00745502	0v8
TraesCS2A02G465500	53.7864	0.881082	0.321831	2.73772	0.00618675	0.0336814	0v8
TraesCS2A02G465800	394.722	-0.807614	0.169276	-4.77099	1.8332319415821e-06	3.97715047531687e-05	0v8
TraesCS2A02G466800	3038.55	-0.420136	0.114709	-3.66261	0.000249656	0.00252941	0v8
TraesCS2A02G467700	61.7413	-1.22014	0.399147	-3.05687	0.00223661	0.0150816	0v8
TraesCS2A02G468900	53.5498	1.16982	0.348414	3.35755	0.000786362	0.00648213	0v8
TraesCS2A02G470100	49.2985	-1.33227	0.414251	-3.21609	0.0012995	0.0097589	0v8
TraesCS2A02G473000	3325.14	-0.366659	0.130983	-2.79928	0.0051216	0.0290425	0v8
TraesCS2A02G475900	2634.77	-0.38444	0.148277	-2.59272	0.00952201	0.0469719	0v8
TraesCS2A02G477600	68.3652	-1.9678	0.357957	-5.49732	3.85610786801223e-08	1.32203417632105e-06	0v8
TraesCS2A02G478600	94.2542	-1.03619	0.283927	-3.64947	0.000262777	0.00263595	0v8
TraesCS2A02G478700	23.0346	-1.57259	0.502641	-3.12865	0.0017561	0.0124634	0v8
TraesCS2A02G479000	44.1587	1.13651	0.375158	3.02943	0.00245016	0.0162066	0v8
TraesCS2A02G481000	502.429	-0.402377	0.151396	-2.65779	0.00786552	0.040577	0v8
TraesCS2A02G481500	20.133	-1.91404	0.542837	-3.52599	0.000421907	0.00389843	0v8
TraesCS2A02G484100	13620	0.415445	0.131013	3.17102	0.00151904	0.0110633	0v8
TraesCS2A02G486400	152.325	0.582025	0.215003	2.70706	0.0067883	0.036226	0v8
TraesCS2A02G487900	167.376	-0.670089	0.215511	-3.1093	0.00187533	0.0131238	0v8
TraesCS2A02G488000	1738.54	0.331132	0.117509	2.81792	0.00483353	0.0277395	0v8
TraesCS2A02G488400	1200.19	-0.49709	0.114724	-4.33293	1.47137721258423e-05	0.000237777	0v8
TraesCS2A02G489600	16491.4	-0.297642	0.103242	-2.88295	0.00393972	0.0235983	0v8
TraesCS2A02G491000	386.691	0.752833	0.236613	3.18171	0.00146408	0.0107343	0v8
TraesCS2A02G495500	504	-0.451642	0.152553	-2.96055	0.00307087	0.0193593	0v8
TraesCS2A02G495600	30.709	1.56785	0.442762	3.54106	0.00039853	0.00372123	0v8
TraesCS2A02G496100	686.594	0.468602	0.149448	3.13556	0.00171527	0.012247	0v8
TraesCS2A02G498700	255.654	-0.866281	0.177918	-4.869	1.1216475698035e-06	2.60459242806214e-05	0v8
TraesCS2A02G501700	79.1034	-1.0303	0.305716	-3.37011	0.000751386	0.00625486	0v8
TraesCS2A02G503900	57.4715	0.97264	0.340878	2.85334	0.00432627	0.0254171	0v8
TraesCS2A02G508900	4582.7	-0.558443	0.11163	-5.00262	5.65560995400526e-07	1.43221548081983e-05	0v8
TraesCS2A02G510400	434.016	-1.60937	0.494191	-3.25658	0.00112765	0.00871308	0v8
TraesCS2A02G510700	78.0106	-1.50734	0.346297	-4.35274	1.34449601871267e-05	0.000220159	0v8
TraesCS2A02G510800	627.567	-1.72129	0.22832	-7.53895	4.73770943062631e-14	5.50525719207163e-12	0v8
TraesCS2A02G513700	18.5504	-1.64143	0.591232	-2.77628	0.00549841	0.0307609	0v8
TraesCS2A02G514200	598.908	-0.452186	0.144028	-3.13958	0.00169191	0.0121138	0v8
TraesCS2A02G514300	183.307	-0.603717	0.2171	-2.78083	0.00542208	0.0304419	0v8
TraesCS2A02G514900	151.077	1.48447	0.231632	6.40872	1.46750482558837e-10	8.57922395700004e-09	0v8
TraesCS2A02G517000	206.022	0.777844	0.183931	4.22899	2.34740119022212e-05	0.000354209	0v8
TraesCS2A02G517100	748.096	-0.746595	0.145373	-5.13574	2.81039386370043e-07	7.72123035053277e-06	0v8
TraesCS2A02G518900	394.129	-1.34604	0.178025	-7.56096	4.00118875056197e-14	4.71707711620305e-12	0v8
TraesCS2A02G520700	1047.22	0.322535	0.125469	2.57064	0.0101512	0.0492501	0v8
TraesCS2A02G521500	102.452	-1.31466	0.288474	-4.55731	5.18125719188527e-06	9.65839481666819e-05	0v8
TraesCS2A02G524100	86.3472	-1.171	0.328837	-3.56104	0.000369382	0.00350153	0v8
TraesCS2A02G524400	64.9558	-2.54364	0.460055	-5.529	3.22063776503984e-08	1.12525868825847e-06	0v8
TraesCS2A02G524800	252.833	-0.593081	0.195163	-3.0389	0.00237446	0.0158184	0v8
TraesCS2A02G525600	129.481	1.31258	0.235985	5.56214	2.66480240533376e-08	9.47399907190322e-07	0v8
TraesCS2A02G526300	441.752	-0.918697	0.180907	-5.07829	3.80847934430763e-07	1.0143899938859e-05	0v8
TraesCS2A02G531600	10.5036	3.02875	0.859079	3.52558	0.000422553	0.00390122	0v8
TraesCS2A02G532100	21.0808	2.5415	0.701499	3.62296	0.000291249	0.00287325	0v8
TraesCS2A02G532200	153.552	1.46986	0.317792	4.62521	3.74218248986709e-06	7.30479174769029e-05	0v8
TraesCS2A02G537100	1273.1	-0.409019	0.11892	-3.43945	0.000582894	0.00509143	0v8
TraesCS2A02G537800	75.6214	0.928109	0.304196	3.05102	0.00228062	0.0153229	0v8
TraesCS2A02G539800	6352.86	0.319605	0.108854	2.9361	0.00332369	0.0206094	0v8
TraesCS2A02G540000	279.21	0.910521	0.177914	5.11775	3.09208397890253e-07	8.42979394748301e-06	0v8
TraesCS2A02G542900	610.725	0.640915	0.135482	4.73064	2.23812745443096e-06	4.69038995974538e-05	0v8
TraesCS2A02G543000	719.569	0.533974	0.130765	4.08346	4.43708924895965e-05	0.000605996	0v8
TraesCS2A02G544900	1153.88	-0.475432	0.16606	-2.86301	0.00419632	0.0248277	0v8
TraesCS2A02G545700	1633.68	0.41348	0.108738	3.80252	0.000143233	0.00160482	0v8
TraesCS2A02G547800	2165.13	0.814006	0.142983	5.69304	1.24797740274066e-08	4.80433174472586e-07	0v8
TraesCS2A02G548300	55.7208	-0.915772	0.335424	-2.73019	0.0063298	0.0342825	0v8
TraesCS2A02G549200	706.604	0.462187	0.125752	3.67539	0.00023749	0.0024287	0v8
TraesCS2A02G549300	243.848	1.13127	0.220002	5.14207	2.71730556311902e-07	7.50170816522437e-06	0v8
TraesCS2A02G551000	42.3754	-1.87779	0.503589	-3.72882	0.000192377	0.00204555	0v8
TraesCS2A02G551400	79.1622	0.772464	0.276535	2.79337	0.0052162	0.0295023	0v8
TraesCS2A02G553500	1244.15	0.43644	0.129378	3.37336	0.000742558	0.00619501	0v8
TraesCS2A02G561100	110.817	0.817733	0.310198	2.63616	0.00838502	0.0426418	0v8
TraesCS2A02G561500	79.4773	0.805908	0.295168	2.73033	0.00632701	0.0342739	0v8
TraesCS2A02G563100	918.077	-0.509261	0.166182	-3.06447	0.00218053	0.0147676	0v8
TraesCS2A02G566700	404.684	-0.631914	0.205262	-3.07857	0.00207996	0.0142481	0v8
TraesCS2A02G567400	56.8392	-1.16185	0.356266	-3.2612	0.00110943	0.00859917	0v8
TraesCS2A02G571300	278.497	-0.755902	0.190984	-3.95793	7.56013952079591e-05	0.000942417	0v8
TraesCS2A02G575400	1083	-0.374631	0.117122	-3.19863	0.00138081	0.0102501	0v8
TraesCS2A02G577100	394.739	0.747667	0.154779	4.83055	1.3615698098641e-06	3.074837819122e-05	0v8
TraesCS2A02G583100	2564.26	-0.372461	0.13035	-2.8574	0.00427122	0.0251562	0v8
TraesCS2A02G583400	78.9841	-1.11234	0.297863	-3.73439	0.000188168	0.0020087	0v8
TraesCS2A02G583500	255.502	0.593062	0.210599	2.81607	0.0048615	0.0278658	0v8
TraesCS2A02G588100	240.06	-0.829599	0.189733	-4.37246	1.2285578917668e-05	0.000203823	0v8
TraesCS2B02G002800	38.5697	-1.82506	0.438912	-4.15814	3.2084741970596e-05	0.000460257	0v8
TraesCS2B02G007700	266.997	0.614769	0.17319	3.54967	0.000385711	0.00362361	0v8
TraesCS2B02G010300	394.355	0.423515	0.150242	2.81889	0.00481906	0.0276865	0v8
TraesCS2B02G013500	228.993	0.547026	0.175952	3.10896	0.00187748	0.0131362	0v8
TraesCS2B02G017200	15.3524	-1.9697	0.648611	-3.03679	0.00239109	0.0159105	0v8
TraesCS2B02G030700	1020.98	0.633239	0.134438	4.71028	2.47381217940991e-06	5.10109067074977e-05	0v8
TraesCS2B02G034200	70.2907	-1.51658	0.327417	-4.63196	3.62214055205671e-06	7.10225111151202e-05	0v8
TraesCS2B02G035600	259.105	-0.816408	0.185945	-4.3906	1.13039578052522e-05	0.000189421	0v8
TraesCS2B02G037400	2068.68	0.755512	0.152737	4.94648	7.55660987574902e-07	1.85099403721047e-05	0v8
TraesCS2B02G041500	105.136	0.876196	0.260183	3.36761	0.000758226	0.00629885	0v8
TraesCS2B02G047400	14.6207	1.97012	0.630952	3.12245	0.00179353	0.0126781	0v8
TraesCS2B02G047900	192.422	0.732427	0.206355	3.54936	0.000386166	0.00362548	0v8
TraesCS2B02G048300	398.315	-0.403746	0.153552	-2.62937	0.00855435	0.0432839	0v8
TraesCS2B02G049700	95.9353	0.664022	0.257939	2.57433	0.0100433	0.0488228	0v8
TraesCS2B02G050400	1133.36	-0.796082	0.123386	-6.45194	1.10423671968874e-10	6.63314061723196e-09	0v8
TraesCS2B02G051400	330.803	-1.02868	0.212807	-4.83389	1.33889084502572e-06	3.03086404223667e-05	0v8
TraesCS2B02G053000	1519.81	-0.384933	0.112352	-3.42613	0.000612245	0.00530288	0v8
TraesCS2B02G053100	2494.31	-0.317973	0.118407	-2.68543	0.00724375	0.0380901	0v8
TraesCS2B02G053600	1348.56	-0.377737	0.12949	-2.91712	0.00353285	0.0216366	0v8
TraesCS2B02G057000	463.912	0.459744	0.144845	3.17404	0.00150331	0.0109628	0v8
TraesCS2B02G062500	28.0125	-1.81822	0.470072	-3.86796	0.000109749	0.00128271	0v8
TraesCS2B02G068800	291.485	-1.65005	0.202107	-8.16426	3.23413851988962e-16	5.33125171246688e-14	0v8
TraesCS2B02G069400	13.4984	2.27069	0.667768	3.40041	0.000672841	0.00570657	0v8
TraesCS2B02G070700	117.642	-0.696833	0.23214	-3.00178	0.00268402	0.0174142	0v8
TraesCS2B02G071000	314.262	0.536804	0.160159	3.3517	0.000803183	0.00659217	0v8
TraesCS2B02G074200	488.97	0.476357	0.153837	3.09651	0.00195814	0.0135796	0v8
TraesCS2B02G075800	61.4346	-3.47464	1.16486	-2.98289	0.00285541	0.0182856	0v8
TraesCS2B02G077700	8965.71	-0.364905	0.119869	-3.0442	0.00233304	0.0155956	0v8
TraesCS2B02G078300	8788.71	-0.352891	0.103186	-3.41995	0.000626331	0.0054064	0v8
TraesCS2B02G078600	65.5997	-2.10382	0.354593	-5.93304	2.97368873855684e-09	1.29612600775253e-07	0v8
TraesCS2B02G080000	556.443	-0.480156	0.140668	-3.4134	0.00064158	0.00551151	0v8
TraesCS2B02G080100	69.8898	0.742955	0.282698	2.62809	0.00858666	0.0434087	0v8
TraesCS2B02G082400	132.105	-0.639508	0.231051	-2.76783	0.0056431	0.0314216	0v8
TraesCS2B02G082500	2523.3	-0.323912	0.120453	-2.68912	0.00716401	0.0377689	0v8
TraesCS2B02G087400	152.214	-0.979156	0.237879	-4.1162	3.85174880921203e-05	0.000537444	0v8
TraesCS2B02G091800	878.755	-0.333317	0.125393	-2.65818	0.00785641	0.0405438	0v8
TraesCS2B02G096800	134.457	-0.683148	0.253125	-2.69886	0.00695782	0.0369433	0v8
TraesCS2B02G097300	6245.4	-0.313541	0.106963	-2.9313	0.00337549	0.0208599	0v8
TraesCS2B02G098800	1321.22	0.599193	0.127206	4.71043	2.4719858706998e-06	5.09991502845095e-05	0v8
TraesCS2B02G099500	167.25	-0.639879	0.207995	-3.07641	0.00209511	0.0143262	0v8
TraesCS2B02G100700	127.281	2.87609	0.721586	3.98579	6.72549326314463e-05	0.000853572	0v8
TraesCS2B02G100800	1623.59	2.43573	0.570898	4.26649	1.98569831718494e-05	0.000306898	0v8
TraesCS2B02G102900	27.4118	-1.7382	0.524057	-3.31682	0.000910469	0.00731912	0v8
TraesCS2B02G104200	580.315	-0.413096	0.148553	-2.7808	0.00542259	0.0304419	0v8
TraesCS2B02G106000	192.766	-0.537408	0.208959	-2.57183	0.0101163	0.0491143	0v8
TraesCS2B02G109100	29.8992	1.26423	0.443002	2.85379	0.00432009	0.025386	0v8
TraesCS2B02G109900	364.237	0.531553	0.166722	3.18827	0.00143129	0.0105488	0v8
TraesCS2B02G111900	315.055	-0.678275	0.172839	-3.92431	8.69782997928192e-05	0.0010616	0v8
TraesCS2B02G112000	186.349	0.581183	0.186071	3.12345	0.00178744	0.0126382	0v8
TraesCS2B02G113500	1634.95	-0.297777	0.112843	-2.63886	0.00831847	0.042374	0v8
TraesCS2B02G113900	30.9083	-1.36748	0.421741	-3.24246	0.00118502	0.00907096	0v8
TraesCS2B02G115700	293.732	0.694552	0.160971	4.31477	1.59767653380357e-05	0.000254345	0v8
TraesCS2B02G116000	218.993	0.60352	0.185493	3.2536	0.00113953	0.00879398	0v8
TraesCS2B02G118000	67.9695	-1.56978	0.314879	-4.98534	6.18518610362968e-07	1.55262135100675e-05	0v8
TraesCS2B02G119600	311.613	-0.501216	0.178119	-2.81394	0.0048939	0.028011	0v8
TraesCS2B02G121500	244.641	-0.489013	0.181478	-2.69461	0.00704716	0.0372846	0v8
TraesCS2B02G121700	738.456	0.520492	0.135717	3.83512	0.000125503	0.0014308	0v8
TraesCS2B02G122200	121.018	0.809632	0.228662	3.54073	0.000399014	0.00372453	0v8
TraesCS2B02G122500	466.126	0.373784	0.1397	2.67561	0.00745929	0.0389813	0v8
TraesCS2B02G123900	2993.37	-0.549195	0.10839	-5.06685	4.04448041276925e-07	1.07021141524262e-05	0v8
TraesCS2B02G124100	470.529	-0.560657	0.148137	-3.78473	0.000153876	0.00169901	0v8
TraesCS2B02G126400	624.181	0.669883	0.151815	4.4125	1.02182007260953e-05	0.000174318	0v8
TraesCS2B02G130900	390.192	0.456718	0.147787	3.09039	0.00199895	0.0138016	0v8
TraesCS2B02G134100	1885.49	0.501903	0.113695	4.41446	1.01261965486289e-05	0.000173061	0v8
TraesCS2B02G134700	108.318	-2.06199	0.670122	-3.07704	0.00209067	0.0143027	0v8
TraesCS2B02G135500	163.219	-0.870456	0.232013	-3.75176	0.000175601	0.00189704	0v8
TraesCS2B02G137400	85.8225	1.038	0.27783	3.73612	0.000186882	0.0019974	0v8
TraesCS2B02G140800	45.0207	-1.45412	0.43885	-3.31347	0.000921445	0.00739059	0v8
TraesCS2B02G141600	31.5261	-1.34865	0.439148	-3.07107	0.00213295	0.0145304	0v8
TraesCS2B02G141900	330.059	-0.522828	0.189838	-2.75408	0.00588576	0.0325015	0v8
TraesCS2B02G142000	498.871	0.596962	0.159615	3.74002	0.000184004	0.0019713	0v8
TraesCS2B02G145500	247.04	-0.762306	0.172906	-4.40878	1.03955678914793e-05	0.000176547	0v8
TraesCS2B02G147400	93.263	-1.04402	0.304039	-3.43384	0.000595084	0.00518017	0v8
TraesCS2B02G147900	19.3603	-1.47377	0.571915	-2.57691	0.00996878	0.048556	0v8
TraesCS2B02G148000	4475.53	-0.534315	0.111417	-4.79564	1.62152363537054e-06	3.56534002587521e-05	0v8
TraesCS2B02G148600	722.008	-0.418309	0.138402	-3.02242	0.00250766	0.0165041	0v8
TraesCS2B02G151100	1025	0.397399	0.131759	3.0161	0.00256051	0.0167741	0v8
TraesCS2B02G151800	41.507	-1.52913	0.405698	-3.76912	0.000163822	0.00178888	0v8
TraesCS2B02G153700	117.78	0.917017	0.236061	3.88466	0.000102474	0.00121092	0v8
TraesCS2B02G160700	540.441	-0.442547	0.171858	-2.57507	0.0100221	0.0487279	0v8
TraesCS2B02G161200	7.77583	6.41424	1.4037	4.56954	4.88805587375566e-06	9.1934360324109e-05	0v8
TraesCS2B02G162000	238.039	-0.778279	0.274415	-2.83613	0.00456634	0.0265116	0v8
TraesCS2B02G162100	60.3667	4.36307	0.527356	8.27349	1.30097723828622e-16	2.32723076574948e-14	0v8
TraesCS2B02G167100	1327.28	-0.610437	0.133618	-4.56854	4.91136860567218e-06	9.23115903723058e-05	0v8
TraesCS2B02G168800	52.9086	1.78095	0.367548	4.84548	1.26306390402783e-06	2.88687229914558e-05	0v8
TraesCS2B02G171500	142.426	-0.708007	0.224346	-3.15587	0.00160021	0.0115653	0v8
TraesCS2B02G177000	1239.19	-0.397197	0.117165	-3.39005	0.000698786	0.00589313	0v8
TraesCS2B02G177500	30.2451	-1.81209	0.473728	-3.82517	0.00013068	0.00148295	0v8
TraesCS2B02G177900	46.1974	-1.34826	0.403082	-3.34487	0.000823217	0.00672693	0v8
TraesCS2B02G178000	113.165	-0.92331	0.294292	-3.13739	0.00170458	0.012183	0v8
TraesCS2B02G178300	146.42	0.757369	0.21097	3.58994	0.000330752	0.00319304	0v8
TraesCS2B02G180000	17.7738	-2.40651	0.605145	-3.97676	6.98609755139914e-05	0.000882499	0v8
TraesCS2B02G180500	173.106	-0.877352	0.209279	-4.19226	2.7619392117005e-05	0.000406642	0v8
TraesCS2B02G182300	93.7356	0.891717	0.339069	2.6299	0.008541	0.0432406	0v8
TraesCS2B02G182700	275.681	-0.873584	0.180021	-4.85269	1.21798133058397e-06	2.79849470551436e-05	0v8
TraesCS2B02G184600	140.93	0.700609	0.219178	3.19653	0.00139091	0.0103092	0v8
TraesCS2B02G184900	182.705	-1.11602	0.234754	-4.754	1.99432526583186e-06	4.25791447757008e-05	0v8
TraesCS2B02G185300	1003.28	0.764251	0.126845	6.02508	1.69024750928582e-09	7.75462583022345e-08	0v8
TraesCS2B02G187600	806.972	-0.634679	0.190019	-3.34009	0.000837513	0.00682161	0v8
TraesCS2B02G188200	2733.77	0.474317	0.125771	3.77129	0.000162405	0.0017768	0v8
TraesCS2B02G189600	380.14	-0.610845	0.155362	-3.93176	8.43257968482678e-05	0.00103502	0v8
TraesCS2B02G190700	226.222	0.653587	0.177674	3.67858	0.000234534	0.00240497	0v8
TraesCS2B02G191100	24.704	1.51055	0.512497	2.94744	0.00320414	0.0200258	0v8
TraesCS2B02G191500	250.266	1.63309	0.267932	6.09519	1.09310937242941e-09	5.25603791505177e-08	0v8
TraesCS2B02G193600	255.616	1.89118	0.502095	3.76657	0.000165503	0.00180308	0v8
TraesCS2B02G193700	965.022	0.489678	0.165138	2.96526	0.00302425	0.0191164	0v8
TraesCS2B02G194100	143.48	1.01068	0.286806	3.52392	0.00042522	0.00391932	0v8
TraesCS2B02G194400	10030.7	0.472933	0.141211	3.34913	0.000810659	0.00664487	0v8
TraesCS2B02G194500	4298.53	0.863624	0.170056	5.07846	3.80499679203375e-07	1.01393866583208e-05	0v8
TraesCS2B02G194600	125.298	1.48605	0.326648	4.54941	5.37976234971214e-06	9.98902435503524e-05	0v8
TraesCS2B02G194700	2087.49	0.676236	0.17076	3.96016	7.49005848156974e-05	0.000935119	0v8
TraesCS2B02G194900	1358.97	1.08934	0.202502	5.37943	7.4722911293284e-08	2.39934168051923e-06	0v8
TraesCS2B02G198300	431.862	0.50048	0.142679	3.50774	0.000451932	0.00411947	0v8
TraesCS2B02G200300	338.527	-0.883787	0.166564	-5.30599	1.12064084991997e-07	3.46305504280989e-06	0v8
TraesCS2B02G200800	614.439	-0.559519	0.148202	-3.77539	0.00015976	0.00175331	0v8
TraesCS2B02G201700	259.388	-0.629661	0.190438	-3.30638	0.000945084	0.00753649	0v8
TraesCS2B02G201900	124.836	-0.942676	0.234918	-4.01278	6.00070146139557e-05	0.000778485	0v8
TraesCS2B02G202200	256.737	1.27977	0.188142	6.80217	1.03055622725027e-11	7.71977825924089e-10	0v8
TraesCS2B02G204200	323.097	-0.952093	0.162836	-5.84696	5.0064619449672e-09	2.09363149742854e-07	0v8
TraesCS2B02G204700	249.018	0.732699	0.193859	3.77954	0.000157117	0.00173003	0v8
TraesCS2B02G206600	52.5293	-1.09087	0.354169	-3.08009	0.00206941	0.0141844	0v8
TraesCS2B02G207400	779.445	-0.613858	0.139355	-4.40499	1.05791118536375e-05	0.000179235	0v8
TraesCS2B02G208000	19.611	1.38363	0.538726	2.56834	0.0102186	0.0495006	0v8
TraesCS2B02G211000	1128.14	0.587973	0.138461	4.24649	2.1714183189879e-05	0.00033109	0v8
TraesCS2B02G211200	52.6325	2.00944	0.430924	4.66308	3.1151113562155e-06	6.2551524279588e-05	0v8
TraesCS2B02G211300	42.4211	1.31745	0.39867	3.30461	0.000951076	0.00757894	0v8
TraesCS2B02G211400	47.5331	1.33515	0.392444	3.40214	0.000668597	0.0056789	0v8
TraesCS2B02G211500	28.3172	1.5167	0.585045	2.59246	0.00952935	0.0470011	0v8
TraesCS2B02G211700	24.9563	2.48382	0.546771	4.54271	5.55354528662592e-06	0.00010268	0v8
TraesCS2B02G211900	932.371	0.453689	0.142614	3.18123	0.00146653	0.0107443	0v8
TraesCS2B02G213400	774.696	-0.718288	0.135429	-5.30379	1.13423860044862e-07	3.50125934006746e-06	0v8
TraesCS2B02G213700	819.507	-0.553743	0.145633	-3.80232	0.000143345	0.00160484	0v8
TraesCS2B02G213800	383.494	-0.505303	0.148134	-3.41112	0.000646975	0.00554861	0v8
TraesCS2B02G214000	1262.91	-0.455362	0.127466	-3.57241	0.00035371	0.00337896	0v8
TraesCS2B02G214300	46.0061	-1.01484	0.370283	-2.74071	0.00613073	0.0334503	0v8
TraesCS2B02G215000	18.184	-3.44368	0.845991	-4.07059	4.68945938293021e-05	0.000634352	0v8
TraesCS2B02G215800	1139.83	-0.611677	0.208982	-2.92694	0.00342317	0.0210811	0v8
TraesCS2B02G216100	652.414	-0.644627	0.134619	-4.78853	1.68009511768903e-06	3.68555024153478e-05	0v8
TraesCS2B02G216300	881.901	-0.731065	0.144736	-5.05104	4.39421851501889e-07	1.15040884170204e-05	0v8
TraesCS2B02G216600	310.7	-0.484336	0.166464	-2.90956	0.00361936	0.0220523	0v8
TraesCS2B02G217200	464.194	-0.632272	0.21913	-2.88537	0.00390951	0.0234521	0v8
TraesCS2B02G217500	1229.53	-0.415628	0.142226	-2.9223	0.00347455	0.0213471	0v8
TraesCS2B02G217800	1147.28	-0.3259	0.126363	-2.57907	0.00990657	0.0483444	0v8
TraesCS2B02G219200	680.04	-0.607511	0.139986	-4.33979	1.42615851424075e-05	0.000231525	0v8
TraesCS2B02G225900	4810.72	-0.383756	0.112745	-3.40374	0.000664697	0.00565441	0v8
TraesCS2B02G226600	199.043	-1.5071	0.234137	-6.43684	1.21987145277622e-10	7.2814769053819e-09	0v8
TraesCS2B02G228300	140.757	-0.649044	0.230584	-2.81479	0.00488096	0.0279519	0v8
TraesCS2B02G228500	241.13	-0.728442	0.17836	-4.0841	4.42475090988581e-05	0.000604457	0v8
TraesCS2B02G229800	92.6668	0.807079	0.268577	3.00502	0.00265566	0.0172647	0v8
TraesCS2B02G230300	123.52	-1.7277	0.248939	-6.94024	3.91431294576857e-12	3.24036403282388e-10	0v8
TraesCS2B02G230700	485.722	-0.592968	0.206466	-2.87198	0.00407906	0.024246	0v8
TraesCS2B02G230900	1365.99	0.558368	0.116232	4.80389	1.55610845483846e-06	3.44824877061625e-05	0v8
TraesCS2B02G231500	333.509	0.666934	0.172787	3.85985	0.000113456	0.00131864	0v8
TraesCS2B02G231800	1041.05	0.462018	0.146487	3.154	0.00161051	0.0116235	0v8
TraesCS2B02G232500	99.3719	0.99256	0.281946	3.52039	0.000430911	0.00396033	0v8
TraesCS2B02G232700	55.8087	-2.30034	0.440404	-5.22326	1.75802128832123e-07	5.11494895718542e-06	0v8
TraesCS2B02G233000	99.6463	-0.905079	0.26539	-3.41037	0.000648741	0.00555873	0v8
TraesCS2B02G233800	112.469	-0.667753	0.240405	-2.77762	0.00547586	0.0306603	0v8
TraesCS2B02G234400	182.761	-0.492212	0.18667	-2.6368	0.00836925	0.0425791	0v8
TraesCS2B02G234700	237.423	0.56357	0.192083	2.93399	0.00334639	0.0207207	0v8
TraesCS2B02G236000	83.5502	3.58097	0.392427	9.12521	7.15985232536148e-20	1.92420182920354e-17	0v8
TraesCS2B02G237200	1034.36	-0.555054	0.131201	-4.23056	2.33111344178568e-05	0.000351939	0v8
TraesCS2B02G237300	101.059	1.28749	0.376941	3.41563	0.000636343	0.00547365	0v8
TraesCS2B02G237800	111.419	-0.917279	0.274399	-3.34286	0.000829183	0.00676834	0v8
TraesCS2B02G238800	23.4717	-2.51551	0.640854	-3.92525	8.66399706339604e-05	0.00105861	0v8
TraesCS2B02G239200	886.905	0.590727	0.137516	4.2957	1.74143631664355e-05	0.000274001	0v8
TraesCS2B02G239300	234.44	0.535571	0.200459	2.67172	0.00754627	0.0393055	0v8
TraesCS2B02G239900	322.817	-0.539009	0.175631	-3.06899	0.00214785	0.0146073	0v8
TraesCS2B02G240800	36.5304	1.09734	0.388249	2.82638	0.0047077	0.0271599	0v8
TraesCS2B02G241000	23.8199	-1.59275	0.557409	-2.85741	0.00427113	0.0251562	0v8
TraesCS2B02G242700	27.9052	1.28085	0.445914	2.87241	0.00407352	0.0242233	0v8
TraesCS2B02G244000	155.75	0.55795	0.205511	2.71494	0.00662871	0.0355214	0v8
TraesCS2B02G244400	803.303	-0.431001	0.16453	-2.61959	0.00880366	0.0442689	0v8
TraesCS2B02G246600	298.218	-0.490431	0.17854	-2.7469	0.00601624	0.0329971	0v8
TraesCS2B02G247000	41.598	1.44935	0.444084	3.26368	0.00109974	0.00853686	0v8
TraesCS2B02G248700	1175.03	-0.381127	0.122186	-3.11924	0.0018132	0.0127869	0v8
TraesCS2B02G249400	456.486	0.441667	0.141937	3.11172	0.00186001	0.0130513	0v8
TraesCS2B02G250100	426.607	-0.541684	0.149099	-3.63305	0.000280087	0.00277911	0v8
TraesCS2B02G250500	243.63	-0.951081	0.225739	-4.21319	2.51783677399663e-05	0.000375332	0v8
TraesCS2B02G251800	1244.6	-0.402942	0.149477	-2.69567	0.00702473	0.0372076	0v8
TraesCS2B02G253000	224.037	0.536143	0.209007	2.56519	0.0103121	0.0498471	0v8
TraesCS2B02G253100	393.713	-0.546188	0.150147	-3.63769	0.000275094	0.00273867	0v8
TraesCS2B02G256300	398.029	-0.52036	0.146879	-3.54278	0.00039594	0.00370376	0v8
TraesCS2B02G259000	264.417	0.712804	0.229283	3.10884	0.00187826	0.0131362	0v8
TraesCS2B02G259600	168.212	0.50182	0.194775	2.57642	0.00998304	0.048606	0v8
TraesCS2B02G260600	851.921	-0.349573	0.121789	-2.87031	0.00410067	0.0243539	0v8
TraesCS2B02G260800	5286.7	0.387978	0.145309	2.67002	0.00758475	0.0394649	0v8
TraesCS2B02G261100	73.4169	0.847958	0.314376	2.69727	0.00699098	0.0370842	0v8
TraesCS2B02G261200	2456.82	-0.280601	0.108042	-2.59716	0.0093998	0.0464996	0v8
TraesCS2B02G261500	511.02	-0.427483	0.14452	-2.95795	0.00309691	0.0194931	0v8
TraesCS2B02G265800	1115.87	-0.486273	0.124648	-3.90117	9.57282504378554e-05	0.0011474	0v8
TraesCS2B02G267100	206.547	1.30978	0.213562	6.13302	8.62288264849285e-10	4.28288189614307e-08	0v8
TraesCS2B02G267700	276.952	0.838895	0.198199	4.2326	2.31009513374293e-05	0.000349417	0v8
TraesCS2B02G267800	244.651	0.6111	0.172164	3.54952	0.000385937	0.00362513	0v8
TraesCS2B02G268100	129.517	0.68271	0.245523	2.78064	0.00542522	0.0304536	0v8
TraesCS2B02G270300	6546.72	-0.338408	0.12047	-2.80905	0.00496878	0.0283238	0v8
TraesCS2B02G270700	211.286	-0.927661	0.210847	-4.39968	1.08410304634041e-05	0.00018269	0v8
TraesCS2B02G271600	171.248	1.19453	0.313659	3.80836	0.000139892	0.00157239	0v8
TraesCS2B02G272300	1747.11	-0.421206	0.131961	-3.1919	0.0014134	0.0104442	0v8
TraesCS2B02G273700	307.196	-0.471746	0.159664	-2.95462	0.00313057	0.019657	0v8
TraesCS2B02G273900	464.78	-0.51908	0.154348	-3.36306	0.000770842	0.00638401	0v8
TraesCS2B02G274500	279.505	0.486376	0.188028	2.58672	0.00968939	0.0475664	0v8
TraesCS2B02G275800	191.672	0.72974	0.204361	3.57085	0.000355831	0.00339522	0v8
TraesCS2B02G277700	301.041	0.578543	0.172325	3.35727	0.000787154	0.00648502	0v8
TraesCS2B02G278200	22.0049	-1.77482	0.565284	-3.13969	0.00169126	0.0121107	0v8
TraesCS2B02G279700	1439.8	-0.557104	0.128844	-4.32385	1.53327113399559e-05	0.000245679	0v8
TraesCS2B02G280300	64.1514	-1.02823	0.322969	-3.18367	0.00145418	0.0106801	0v8
TraesCS2B02G281000	1308.53	-0.409965	0.116355	-3.52339	0.000426059	0.00392528	0v8
TraesCS2B02G281400	166.152	1.20727	0.205328	5.87972	4.10972378400761e-09	1.74435626419113e-07	0v8
TraesCS2B02G281900	373.699	0.460071	0.176883	2.60099	0.00929559	0.046133	0v8
TraesCS2B02G282400	13.9261	-2.42625	0.750956	-3.23088	0.00123411	0.00936586	0v8
TraesCS2B02G284500	255.079	-0.799381	0.228096	-3.50458	0.000457327	0.00416129	0v8
TraesCS2B02G287300	904.08	0.526147	0.118458	4.44165	8.92717395693491e-06	0.000155379	0v8
TraesCS2B02G287500	260.513	-0.488333	0.167926	-2.90803	0.00363716	0.0221368	0v8
TraesCS2B02G287600	74.4071	-0.87281	0.279788	-3.11954	0.00181131	0.0127751	0v8
TraesCS2B02G289000	175.239	0.81026	0.261385	3.09988	0.001936	0.0134499	0v8
TraesCS2B02G289600	404.175	0.561161	0.172542	3.25231	0.0011447	0.00882786	0v8
TraesCS2B02G292000	1584.65	-0.450526	0.137149	-3.28494	0.00102002	0.00802462	0v8
TraesCS2B02G292100	765.707	-0.398849	0.14596	-2.73259	0.00628393	0.0340894	0v8
TraesCS2B02G292300	127.114	0.85347	0.219413	3.88978	0.000100334	0.00119127	0v8
TraesCS2B02G292500	310.011	0.485431	0.158536	3.06195	0.00219897	0.0148623	0v8
TraesCS2B02G293500	1813.29	-0.533267	0.11827	-4.50891	6.51615566346322e-06	0.000117902	0v8
TraesCS2B02G294500	189.153	1.6014	0.222985	7.18162	6.88914965888606e-13	6.55463289524821e-11	0v8
TraesCS2B02G294800	354.474	0.57364	0.158413	3.62117	0.000293272	0.0028881	0v8
TraesCS2B02G295300	251.87	-0.582684	0.173682	-3.35489	0.000793956	0.00653157	0v8
TraesCS2B02G296500	603.623	-0.406783	0.131616	-3.09069	0.00199695	0.0137894	0v8
TraesCS2B02G298000	1460.35	-0.402752	0.109574	-3.67563	0.000237266	0.00242721	0v8
TraesCS2B02G300200	912.973	-0.378649	0.128555	-2.94542	0.00322517	0.0201284	0v8
TraesCS2B02G302300	169.606	0.721159	0.211641	3.40746	0.000655697	0.00559632	0v8
TraesCS2B02G303200	9.20406	-3.00512	0.943984	-3.18344	0.00145536	0.0106873	0v8
TraesCS2B02G304200	3120.33	-0.325539	0.101795	-3.19799	0.00138391	0.0102691	0v8
TraesCS2B02G305000	2026.11	-0.399853	0.111006	-3.60209	0.000315671	0.00306999	0v8
TraesCS2B02G305800	587.674	0.452616	0.157173	2.87973	0.0039801	0.0237674	0v8
TraesCS2B02G306000	103.053	0.71819	0.248821	2.88637	0.00389709	0.0233949	0v8
TraesCS2B02G306200	84.6662	0.85718	0.291242	2.94319	0.00324852	0.0202385	0v8
TraesCS2B02G307600	664.212	-0.382481	0.13947	-2.74238	0.00609951	0.0333538	0v8
TraesCS2B02G308200	673.253	0.873703	0.135723	6.43742	1.21521594594777e-10	7.26133144688243e-09	0v8
TraesCS2B02G309400	322.702	0.485275	0.162692	2.98279	0.00285636	0.0182896	0v8
TraesCS2B02G310000	3203.26	-0.36993	0.114334	-3.23552	0.00121422	0.00924831	0v8
TraesCS2B02G310600	146.253	0.689147	0.247294	2.78675	0.00532396	0.0299832	0v8
TraesCS2B02G311500	313.063	0.975875	0.216577	4.50591	6.60904071431143e-06	0.000119202	0v8
TraesCS2B02G311900	277.363	1.06238	0.223144	4.76097	1.92660226383614e-06	4.13982220436119e-05	0v8
TraesCS2B02G312000	7019.74	-0.367841	0.120075	-3.06342	0.00218824	0.0148084	0v8
TraesCS2B02G313200	80.0017	-0.893322	0.345049	-2.58897	0.00962638	0.0473479	0v8
TraesCS2B02G315100	44.4013	0.937003	0.348494	2.68872	0.00717256	0.0377964	0v8
TraesCS2B02G315300	1244.42	-0.480428	0.119011	-4.03685	5.41745039953846e-05	0.000713817	0v8
TraesCS2B02G316900	667.442	0.622358	0.159241	3.90827	9.2957666673441e-05	0.00112107	0v8
TraesCS2B02G317600	25.8732	-1.80633	0.576284	-3.13445	0.00172176	0.0122888	0v8
TraesCS2B02G319500	202.972	0.609993	0.191438	3.18637	0.00144071	0.010605	0v8
TraesCS2B02G320000	368.188	-0.435587	0.166418	-2.61742	0.0088597	0.0444876	0v8
TraesCS2B02G320900	41.6724	-1.88319	0.386341	-4.87443	1.09122938466484e-06	2.54393540111518e-05	0v8
TraesCS2B02G321400	78.1945	-0.970712	0.289863	-3.34887	0.000811421	0.00665016	0v8
TraesCS2B02G321800	606.318	0.509499	0.150775	3.37921	0.000726957	0.00609534	0v8
TraesCS2B02G322100	10.2988	2.21617	0.775549	2.85755	0.00426929	0.0251501	0v8
TraesCS2B02G322400	355.259	-0.429819	0.164555	-2.61201	0.00900105	0.0450338	0v8
TraesCS2B02G323000	34.5933	-1.6925	0.427851	-3.95583	7.6270764547524e-05	0.000948883	0v8
TraesCS2B02G323800	240.89	-0.639749	0.180367	-3.54693	0.000389751	0.0036531	0v8
TraesCS2B02G326300	1203.95	-0.752647	0.116643	-6.45256	1.09978934018289e-10	6.6134309994073e-09	0v8
TraesCS2B02G326400	1338.92	-0.405002	0.121755	-3.32637	0.00087986	0.00711543	0v8
TraesCS2B02G327900	7.85101	2.55847	0.970719	2.63565	0.00839771	0.0426932	0v8
TraesCS2B02G329800	143.214	0.764763	0.279511	2.73607	0.00621775	0.0338065	0v8
TraesCS2B02G334000	47.1714	-1.0281	0.342489	-3.00185	0.00268345	0.0174125	0v8
TraesCS2B02G334400	461.026	0.426845	0.142943	2.98612	0.0028254	0.0181334	0v8
TraesCS2B02G335600	15.9356	-4.94367	0.988229	-5.00256	5.65753655175189e-07	1.43221548081983e-05	0v8
TraesCS2B02G335700	2265.19	0.327303	0.110583	2.9598	0.00307835	0.0193978	0v8
TraesCS2B02G339800	1060.91	-0.494527	0.140021	-3.53182	0.000412714	0.00383034	0v8
TraesCS2B02G341100	767.962	-0.367258	0.137197	-2.67687	0.00743131	0.0388781	0v8
TraesCS2B02G341200	109.339	-1.2733	0.292239	-4.35704	1.31833556880552e-05	0.000216563	0v8
TraesCS2B02G342400	647.794	-0.375594	0.127467	-2.94659	0.00321297	0.0200677	0v8
TraesCS2B02G342800	1185.13	-0.580222	0.156478	-3.70801	0.000208892	0.00219076	0v8
TraesCS2B02G343800	306.392	-0.776108	0.186509	-4.16124	3.16521857764421e-05	0.000455321	0v8
TraesCS2B02G343900	387.389	-0.458259	0.173479	-2.64159	0.00825188	0.0421256	0v8
TraesCS2B02G344600	1673.49	0.359854	0.125617	2.8647	0.00417408	0.024715	0v8
TraesCS2B02G344700	223.36	0.646119	0.18555	3.48219	0.000497338	0.00446094	0v8
TraesCS2B02G347300	423.923	0.540981	0.145949	3.70664	0.000210027	0.00219941	0v8
TraesCS2B02G347800	1140.42	-0.527688	0.129895	-4.06242	4.85656363606644e-05	0.000651826	0v8
TraesCS2B02G351500	54.4817	-0.999203	0.335142	-2.98144	0.002869	0.0183519	0v8
TraesCS2B02G352700	606.641	0.478933	0.136361	3.51224	0.000444351	0.00405951	0v8
TraesCS2B02G354100	344.407	0.48485	0.166792	2.90691	0.00365019	0.0221964	0v8
TraesCS2B02G356300	385.142	-0.440332	0.155755	-2.82708	0.00469746	0.0271146	0v8
TraesCS2B02G356400	168.24	0.673949	0.21282	3.16676	0.00154146	0.0112064	0v8
TraesCS2B02G357500	1005.32	-0.494317	0.153662	-3.21692	0.00129575	0.00973722	0v8
TraesCS2B02G358100	26.7241	-2.49365	0.540333	-4.61503	3.93042963261577e-06	7.62416219425187e-05	0v8
TraesCS2B02G359400	478.364	-0.997813	0.158699	-6.28747	3.22681472717698e-10	1.74765764965901e-08	0v8
TraesCS2B02G361000	717.148	0.441528	0.142468	3.09914	0.00194083	0.0134758	0v8
TraesCS2B02G362700	671.166	-1.15008	0.151612	-7.58565	3.30818106268728e-14	3.96604049346183e-12	0v8
TraesCS2B02G363600	132.124	0.858932	0.219741	3.90884	9.27395039811347e-05	0.00111891	0v8
TraesCS2B02G364600	699.128	0.443305	0.126569	3.50247	0.00046096	0.00418763	0v8
TraesCS2B02G364700	355.123	0.704447	0.154813	4.55032	5.35651805782517e-06	9.94912260029591e-05	0v8
TraesCS2B02G367900	583.778	0.400781	0.134741	2.97446	0.00293509	0.0186619	0v8
TraesCS2B02G370400	352.419	0.437655	0.158803	2.75597	0.00585185	0.0323584	0v8
TraesCS2B02G370500	160.439	0.648068	0.24701	2.62365	0.00869936	0.0438494	0v8
TraesCS2B02G371300	2500.21	0.667478	0.136245	4.89911	9.62708619433312e-07	2.2853617477325e-05	0v8
TraesCS2B02G371700	658.281	-0.417573	0.158238	-2.63889	0.00831778	0.042374	0v8
TraesCS2B02G371800	1501.46	-0.319373	0.12099	-2.63966	0.00829901	0.0423128	0v8
TraesCS2B02G372500	25.4635	-1.62435	0.522043	-3.11152	0.00186129	0.0130546	0v8
TraesCS2B02G372700	105.09	-1.01387	0.242119	-4.1875	2.82048823599582e-05	0.000413813	0v8
TraesCS2B02G373000	863.158	-0.474629	0.159919	-2.96793	0.00299813	0.0189851	0v8
TraesCS2B02G373200	175.767	0.697245	0.214807	3.24592	0.00117071	0.00898814	0v8
TraesCS2B02G373300	144.705	-0.857727	0.241436	-3.5526	0.000381441	0.00359123	0v8
TraesCS2B02G374700	12210.2	0.425394	0.102505	4.15	3.32479566520921e-05	0.000474304	0v8
TraesCS2B02G375500	22.1612	-1.56286	0.549678	-2.84323	0.00446585	0.0260723	0v8
TraesCS2B02G376300	263.378	0.783051	0.192399	4.06994	4.70260587869833e-05	0.000635559	0v8
TraesCS2B02G377700	244.624	0.736355	0.206017	3.57425	0.000351231	0.00335876	0v8
TraesCS2B02G378400	2958.74	-0.443677	0.10192	-4.35317	1.34182352684107e-05	0.000219785	0v8
TraesCS2B02G378500	412.974	-0.665962	0.152263	-4.37375	1.22132565914868e-05	0.000202741	0v8
TraesCS2B02G379600	104.581	0.766796	0.280856	2.73021	0.0063294	0.0342825	0v8
TraesCS2B02G380800	145.799	-0.597076	0.226191	-2.6397	0.00829804	0.0423117	0v8
TraesCS2B02G381200	603.012	0.379928	0.1471	2.58279	0.00980057	0.0479592	0v8
TraesCS2B02G381500	348.681	-0.45735	0.160791	-2.84437	0.00444989	0.0259979	0v8
TraesCS2B02G381600	213.452	-0.958363	0.231411	-4.14139	3.45213232633582e-05	0.000490372	0v8
TraesCS2B02G386700	64.7195	-0.884677	0.339291	-2.60743	0.00912246	0.0454608	0v8
TraesCS2B02G386900	977.055	-0.818105	0.153828	-5.31831	1.04734159035716e-07	3.26142516325058e-06	0v8
TraesCS2B02G389100	268.002	-1.01962	0.251879	-4.04804	5.16473160571556e-05	0.000685721	0v8
TraesCS2B02G389700	274.642	0.460595	0.163039	2.82505	0.00472726	0.0272478	0v8
TraesCS2B02G390000	1391.14	-0.444302	0.145297	-3.05788	0.00222906	0.0150423	0v8
TraesCS2B02G390700	923.209	-1.09671	0.185852	-5.90098	3.6134221558048e-09	1.5452693572177e-07	0v8
TraesCS2B02G390900	70.0917	-0.982157	0.308186	-3.1869	0.00143807	0.0105933	0v8
TraesCS2B02G391100	870.496	0.655368	0.15653	4.18685	2.8285392865238e-05	0.000414887	0v8
TraesCS2B02G391600	446.069	-0.412515	0.153646	-2.68485	0.00725634	0.038128	0v8
TraesCS2B02G395400	57.7635	-1.6751	0.346277	-4.83747	1.31501987821472e-06	2.98756078581906e-05	0v8
TraesCS2B02G398900	298.897	0.687573	0.191734	3.58608	0.000335682	0.00323238	0v8
TraesCS2B02G399200	921.046	-0.50882	0.185516	-2.74273	0.00609305	0.0333375	0v8
TraesCS2B02G400300	870.864	-0.665786	0.138645	-4.8021	1.57006745591981e-06	3.4764640826001e-05	0v8
TraesCS2B02G400400	130.761	-0.93204	0.247194	-3.77048	0.000162936	0.00178093	0v8
TraesCS2B02G401000	79.3338	1.15221	0.281165	4.09799	4.16744653416533e-05	0.000573173	0v8
TraesCS2B02G402100	30.5391	1.16648	0.424229	2.74966	0.00596577	0.0328075	0v8
TraesCS2B02G403100	883.327	0.53698	0.139721	3.84323	0.000121424	0.00139307	0v8
TraesCS2B02G403900	27.3643	1.16671	0.442714	2.63536	0.00840492	0.0427261	0v8
TraesCS2B02G404600	296.197	-0.943426	0.171244	-5.50924	3.60393543590377e-08	1.24536723234832e-06	0v8
TraesCS2B02G405200	719.867	-0.65957	0.138451	-4.76392	1.89863701918154e-06	4.09369242622465e-05	0v8
TraesCS2B02G405600	15.3249	-1.57792	0.612608	-2.57574	0.0100024	0.0486492	0v8
TraesCS2B02G406400	1754.27	0.353236	0.131379	2.68868	0.00717352	0.0377979	0v8
TraesCS2B02G406500	204.425	-0.715647	0.213788	-3.34746	0.000815571	0.00667645	0v8
TraesCS2B02G406900	898.729	-0.397045	0.138529	-2.86615	0.004155	0.0246252	0v8
TraesCS2B02G407600	10.7235	-2.18498	0.83232	-2.62517	0.00866054	0.0436926	0v8
TraesCS2B02G408600	554.756	-0.455919	0.147737	-3.08602	0.00202857	0.0139653	0v8
TraesCS2B02G409200	39.077	1.82269	0.442641	4.11777	3.82553632295969e-05	0.000534049	0v8
TraesCS2B02G409300	500.055	-0.620479	0.15371	-4.03668	5.42136949731099e-05	0.00071411	0v8
TraesCS2B02G409600	655.11	0.418484	0.13153	3.18167	0.00146428	0.0107343	0v8
TraesCS2B02G410100	116.95	-0.803471	0.243205	-3.30368	0.000954262	0.00759964	0v8
TraesCS2B02G410600	331.612	-0.397111	0.152864	-2.59779	0.00938245	0.0464381	0v8
TraesCS2B02G411900	68.5206	-0.805061	0.294164	-2.73677	0.00620448	0.0337553	0v8
TraesCS2B02G417200	142.391	-1.11934	0.234413	-4.77508	1.79632735075264e-06	3.91177184146618e-05	0v8
TraesCS2B02G418900	1143.79	0.38852	0.137697	2.82155	0.0047792	0.0274937	0v8
TraesCS2B02G419200	90.5711	1.04572	0.262135	3.98924	6.62850104856843e-05	0.00084296	0v8
TraesCS2B02G423100	177.935	0.553743	0.207862	2.66399	0.00772189	0.0399998	0v8
TraesCS2B02G424000	48.2789	-2.09488	0.439001	-4.77194	1.82461123761346e-06	3.96119467228595e-05	0v8
TraesCS2B02G424300	109.313	-0.921141	0.267734	-3.44051	0.000580627	0.00507632	0v8
TraesCS2B02G424900	51.4867	-1.04108	0.35259	-2.95265	0.00315054	0.0197605	0v8
TraesCS2B02G425800	562.686	-0.367004	0.13892	-2.64184	0.00824569	0.0421054	0v8
TraesCS2B02G426000	285.915	0.527559	0.176293	2.99251	0.00276691	0.0178551	0v8
TraesCS2B02G429100	708.199	-0.758715	0.146432	-5.18135	2.20284800722198e-07	6.23949545941707e-06	0v8
TraesCS2B02G431000	21.6814	-1.96859	0.573372	-3.43336	0.000596142	0.00518797	0v8
TraesCS2B02G431400	293.486	0.532102	0.169857	3.13265	0.00173237	0.0123411	0v8
TraesCS2B02G431700	28.6211	1.21518	0.450866	2.69522	0.00703432	0.0372479	0v8
TraesCS2B02G432700	39.229	1.13345	0.39904	2.84044	0.00450509	0.0262527	0v8
TraesCS2B02G433400	477.772	0.387452	0.141296	2.74212	0.00610433	0.0333646	0v8
TraesCS2B02G434800	62.4395	-1.85528	0.352382	-5.26496	1.40219505616807e-07	4.19150621270778e-06	0v8
TraesCS2B02G435100	2107.75	-0.454459	0.12619	-3.60139	0.000316522	0.00307642	0v8
TraesCS2B02G437900	200.56	0.557323	0.183707	3.03376	0.00241524	0.0160227	0v8
TraesCS2B02G438200	73.0004	-1.49959	0.368835	-4.06574	4.78804074315715e-05	0.000644153	0v8
TraesCS2B02G443100	601.161	0.398614	0.130817	3.04711	0.00231051	0.015481	0v8
TraesCS2B02G444400	1665.25	-0.537247	0.11784	-4.55913	5.13664463611795e-06	9.60048024837524e-05	0v8
TraesCS2B02G446200	1931.13	0.360751	0.116961	3.08436	0.00203993	0.0140273	0v8
TraesCS2B02G446300	1535.6	-0.686821	0.13906	-4.93901	7.85196327509071e-07	1.91451915984787e-05	0v8
TraesCS2B02G448400	155.913	1.68077	0.280182	5.99883	1.9873894428481e-09	8.99288673805354e-08	0v8
TraesCS2B02G448500	262.353	0.834111	0.200048	4.16954	3.05209068379464e-05	0.000441622	0v8
TraesCS2B02G449900	25.303	1.54613	0.477961	3.23484	0.00121712	0.00926538	0v8
TraesCS2B02G451100	249.227	-0.936009	0.190424	-4.91541	8.85989006247086e-07	2.12704879713155e-05	0v8
TraesCS2B02G451600	25.3759	-1.74884	0.480257	-3.64147	0.000271089	0.00270561	0v8
TraesCS2B02G451700	35.569	-1.15814	0.394458	-2.93602	0.00332457	0.0206119	0v8
TraesCS2B02G453900	5045.57	-0.389605	0.119086	-3.27162	0.00106934	0.00834881	0v8
TraesCS2B02G454000	3939.2	-0.370788	0.13897	-2.66812	0.00762766	0.0396348	0v8
TraesCS2B02G454300	899.83	0.781277	0.134951	5.78935	7.06572556686104e-09	2.86883128201699e-07	0v8
TraesCS2B02G455900	60.0247	-0.940572	0.321019	-2.92995	0.00339014	0.0209253	0v8
TraesCS2B02G456100	14.3511	-1.80803	0.648404	-2.78843	0.00529636	0.0298604	0v8
TraesCS2B02G457700	247.933	-0.891127	0.201912	-4.41344	1.01739683680768e-05	0.00017372	0v8
TraesCS2B02G457800	1849.49	-0.456677	0.137681	-3.31691	0.000910191	0.00731792	0v8
TraesCS2B02G458900	238.847	0.743209	0.178603	4.16124	3.16523094729613e-05	0.000455321	0v8
TraesCS2B02G461400	1126.06	0.580166	0.122206	4.74743	2.0601660797313e-06	4.38198716118691e-05	0v8
TraesCS2B02G462300	504.885	-0.425164	0.157262	-2.70355	0.0068604	0.036542	0v8
TraesCS2B02G462400	188.08	0.708645	0.210648	3.36413	0.000767865	0.00636401	0v8
TraesCS2B02G462800	40.4736	-1.95326	0.451453	-4.32661	1.51424654212842e-05	0.000243594	0v8
TraesCS2B02G463700	89.5887	1.3627	0.286147	4.76225	1.91449324461791e-06	4.12004758744985e-05	0v8
TraesCS2B02G463800	80.5279	1.17562	0.419615	2.80167	0.00508391	0.0288721	0v8
TraesCS2B02G464200	75.0431	1.32243	0.325867	4.0582	4.94522120270737e-05	0.000661065	0v8
TraesCS2B02G465200	108.267	-0.70593	0.241018	-2.92895	0.00340106	0.020979	0v8
TraesCS2B02G465400	257.576	-0.565836	0.177881	-3.18097	0.00146781	0.0107509	0v8
TraesCS2B02G467100	75.4204	0.926531	0.286763	3.231	0.00123359	0.00936344	0v8
TraesCS2B02G469400	534.308	0.38603	0.140361	2.75027	0.00595464	0.0327543	0v8
TraesCS2B02G471300	29.2572	-1.95679	0.476642	-4.10537	4.03671027919106e-05	0.000557491	0v8
TraesCS2B02G472800	86.7054	1.16703	0.278168	4.19541	2.72375999632115e-05	0.0004017	0v8
TraesCS2B02G474800	70.8649	0.970752	0.373046	2.60223	0.00926204	0.0460269	0v8
TraesCS2B02G474900	202.612	1.0792	0.305656	3.53075	0.000414381	0.00384329	0v8
TraesCS2B02G477500	57.5894	1.5155	0.320343	4.73087	2.23556110335416e-06	4.68822958309174e-05	0v8
TraesCS2B02G478100	1274.99	-0.664982	0.125868	-5.28318	1.26960416455358e-07	3.86857462413625e-06	0v8
TraesCS2B02G478300	15.4629	1.61976	0.609356	2.65816	0.00785694	0.0405438	0v8
TraesCS2B02G479700	120.913	1.06214	0.23752	4.47177	7.75732163243121e-06	0.000136969	0v8
TraesCS2B02G480500	468.222	0.840901	0.181995	4.62047	3.82875129605482e-06	7.4578228976074e-05	0v8
TraesCS2B02G480600	355.837	0.544472	0.180181	3.02181	0.00251265	0.0165254	0v8
TraesCS2B02G482000	386.96	0.474721	0.157866	3.00712	0.0026374	0.0171726	0v8
TraesCS2B02G483000	676.741	0.517424	0.129137	4.00679	6.15507346645537e-05	0.000795056	0v8
TraesCS2B02G484200	1340.81	-0.662779	0.130341	-5.08498	3.67666228941493e-07	9.86229005598689e-06	0v8
TraesCS2B02G484900	1375.85	-0.531032	0.155866	-3.40697	0.000656886	0.00560225	0v8
TraesCS2B02G485800	766.183	-0.417621	0.130733	-3.19445	0.00140098	0.0103672	0v8
TraesCS2B02G486900	34.0278	-1.98028	0.58995	-3.3567	0.000788789	0.00649471	0v8
TraesCS2B02G487900	53.011	-0.988688	0.361427	-2.73552	0.00622827	0.0338477	0v8
TraesCS2B02G489600	828.607	-0.509942	0.136447	-3.73728	0.000186022	0.00199068	0v8
TraesCS2B02G490700	26.0172	-2.15386	0.587838	-3.66403	0.000248275	0.0025199	0v8
TraesCS2B02G490800	383.076	-0.510427	0.190581	-2.67827	0.00740034	0.0387411	0v8
TraesCS2B02G490900	302.694	-0.970005	0.189755	-5.11188	3.18974450746431e-07	8.67102838160456e-06	0v8
TraesCS2B02G491700	837.578	-0.594581	0.152476	-3.89952	9.63840203362748e-05	0.00115453	0v8
TraesCS2B02G492900	169.468	-0.735521	0.221838	-3.31557	0.000914553	0.00734466	0v8
TraesCS2B02G494100	222.379	-0.671768	0.205473	-3.26938	0.00107784	0.00840367	0v8
TraesCS2B02G496700	36.1317	-1.7424	0.473756	-3.67784	0.000235213	0.00240994	0v8
TraesCS2B02G497500	3784.7	-0.713906	0.172639	-4.13524	3.54578207129582e-05	0.000500915	0v8
TraesCS2B02G499600	664.598	-0.764823	0.218418	-3.50164	0.0004624	0.00419937	0v8
TraesCS2B02G503100	19.0039	-1.42424	0.551813	-2.58102	0.00985098	0.0481311	0v8
TraesCS2B02G503600	891.615	0.336235	0.123244	2.7282	0.00636809	0.0344439	0v8
TraesCS2B02G504600	75.2337	0.920182	0.290385	3.16883	0.00153053	0.0111398	0v8
TraesCS2B02G505100	447.466	-0.677501	0.181742	-3.72781	0.000193149	0.00205145	0v8
TraesCS2B02G507100	86.8171	0.724702	0.273375	2.65094	0.00802673	0.0412361	0v8
TraesCS2B02G507200	442.249	0.524663	0.160987	3.25904	0.00111791	0.00865303	0v8
TraesCS2B02G510200	10580.5	0.620775	0.119928	5.17621	2.26436128550472e-07	6.3909975230507e-06	0v8
TraesCS2B02G512900	70.4964	1.30113	0.303032	4.29372	1.7570737350652e-05	0.00027611	0v8
TraesCS2B02G516000	1376.69	-0.449049	0.125313	-3.58342	0.000339126	0.00326272	0v8
TraesCS2B02G517400	14.0674	-2.27811	0.700014	-3.25438	0.00113641	0.00877228	0v8
TraesCS2B02G518500	2182.45	-0.338153	0.115231	-2.93458	0.00334002	0.0206903	0v8
TraesCS2B02G523800	226.92	-0.663539	0.190429	-3.48444	0.000493174	0.00442963	0v8
TraesCS2B02G524400	164.434	0.655049	0.229217	2.85777	0.00426634	0.0251379	0v8
TraesCS2B02G524500	19.9893	-2.10018	0.546962	-3.83973	0.000123172	0.00140733	0v8
TraesCS2B02G525100	71.4335	0.925327	0.302856	3.05533	0.0022481	0.0151348	0v8
TraesCS2B02G525500	618.668	0.424519	0.144059	2.94684	0.00321043	0.0200562	0v8
TraesCS2B02G525900	372.714	-0.475198	0.15581	-3.04985	0.00228954	0.0153719	0v8
TraesCS2B02G526800	295.491	-0.716394	0.180933	-3.95945	7.51237688944563e-05	0.000937287	0v8
TraesCS2B02G528100	556.581	-0.35993	0.136469	-2.63746	0.00835304	0.0425119	0v8
TraesCS2B02G529800	664.549	-0.441122	0.150918	-2.92292	0.00346762	0.0213154	0v8
TraesCS2B02G538600	397.692	-2.0208	0.245631	-8.22697	1.92006641303915e-16	3.28940441141383e-14	0v8
TraesCS2B02G538800	1587.35	-0.606524	0.200846	-3.01984	0.00252906	0.0166045	0v8
TraesCS2B02G539600	490.116	-0.799911	0.146825	-5.44807	5.09204040206628e-08	1.70353535716561e-06	0v8
TraesCS2B02G541100	37.1555	1.07344	0.41656	2.57691	0.00996867	0.048556	0v8
TraesCS2B02G542100	192.611	0.657987	0.207794	3.16654	0.00154266	0.011213	0v8
TraesCS2B02G542300	271.702	-0.855558	0.210137	-4.07144	4.67241910081875e-05	0.000632349	0v8
TraesCS2B02G542400	606.29	-0.704931	0.152769	-4.61434	3.94338279038669e-06	7.64490476962966e-05	0v8
TraesCS2B02G542500	1037.87	-0.567301	0.145054	-3.91097	9.19259660797175e-05	0.00111075	0v8
TraesCS2B02G545600	365.673	-1.12248	0.177325	-6.33005	2.45074433799924e-10	1.37324020188325e-08	0v8
TraesCS2B02G546900	28.1494	-2.78633	0.711732	-3.91485	9.04588849576537e-05	0.0010957	0v8
TraesCS2B02G549300	49.9631	1.10728	0.416318	2.65969	0.00782134	0.0403931	0v8
[truncated: 18,258 more rows]

## Sheet: Table S6
Table S6. GO terms enriched among up- and down-regulated genes from Table S5
category	over_represented_pvalue	under_represented_pvalue	numDEInCat	numInCat	term	ontology	padj_over	time	direction
O:1902600	2.32346e-18	1	37	90	proton transmembrane transport	BP	2.76201e-15	0v8	down-regulated
GO:0006633	2.92666e-16	1	50	168	fatty acid biosynthetic process	BP	2.31938e-13	0v8	down-regulated
GO:0005975	3.42635e-16	1	146	913	carbohydrate metabolic process	BP	2.32747e-13	0v8	down-regulated
GO:0006811	5.42919e-14	1	42	151	monoatomic ion transport	BP	3.22698e-11	0v8	down-regulated
GO:0006096	3.5126e-12	1	42	163	glycolytic process	BP	1.2848e-09	0v8	down-regulated
GO:0006749	1.71931e-11	1	37	127	glutathione metabolic process	BP	5.45021e-09	0v8	down-regulated
GO:0006006	2.14792e-10	1	18	39	glucose metabolic process	BP	5.51453e-08	0v8	down-regulated
GO:0009658	5.22395e-10	1	29	101	chloroplast organization	BP	1.18963e-07	0v8	down-regulated
GO:0046686	1.05895e-09	1	25	78	response to cadmium ion	BP	2.09805e-07	0v8	down-regulated
GO:0006564	1.97376e-09	1	11	15	L-serine biosynthetic process	BP	3.47602e-07	0v8	down-regulated
GO:0006086	4.47749e-09	1	12	20	acetyl-CoA biosynthetic process from pyruvate	BP	7.27653e-07	0v8	down-regulated
GO:0006098	4.94422e-09	1	16	35	pentose-phosphate shunt	BP	7.58379e-07	0v8	down-regulated
GO:0015979	2.86196e-08	1	42	196	photosynthesis	BP	3.78017e-06	0v8	down-regulated
GO:0015986	2.66147e-07	1	17	49	proton motive force-driven ATP synthesis	BP	2.81228e-05	0v8	down-regulated
GO:0055085	3.70422e-07	1	148	1284	transmembrane transport	BP	3.74756e-05	0v8	down-regulated
GO:0015995	1.25667e-06	1	16	51	chlorophyll biosynthetic process	BP	0.000117166	0v8	down-regulated
GO:0006099	1.52184e-06	1	22	92	tricarboxylic acid cycle	BP	0.000139161	0v8	down-regulated
GO:0019252	2.70515e-06	1	14	47	starch biosynthetic process	BP	0.000233873	0v8	down-regulated
GO:0006412	4.48596e-06	0.999997	117	899	translation	BP	0.000374224	0v8	down-regulated
GO:0009306	9.97582e-06	0.999999	9	20	protein secretion	BP	0.000790583	0v8	down-regulated
GO:0009409	1.31718e-05	0.999996	22	99	response to cold	BP	0.000986593	0v8	down-regulated
GO:0009735	1.49324e-05	0.999997	15	52	response to cytokinin	BP	0.00105975	0v8	down-regulated
GO:0015770	1.86997e-05	1	5	6	sucrose transport	BP	0.0012413	0v8	down-regulated
GO:0010951	2.34182e-05	0.999998	8	16	negative regulation of endopeptidase activity	BP	0.00150477	0v8	down-regulated
GO:0006108	3.54208e-05	0.999995	10	28	malate metabolic process	BP	0.00207933	0v8	down-regulated
GO:0009657	4.9081e-05	0.999998	6	10	plastid organization	BP	0.00268379	0v8	down-regulated
GO:0006979	5.35581e-05	0.999975	41	259	response to oxidative stress	BP	0.00289396	0v8	down-regulated
GO:0046034	6.3727e-05	0.999995	7	16	ATP metabolic process	BP	0.00334953	0v8	down-regulated
GO:0006102	6.41024e-05	0.999996	6	11	isocitrate metabolic process	BP	0.00334953	0v8	down-regulated
GO:0010143	6.59329e-05	0.999998	5	7	cutin biosynthetic process	BP	0.00340773	0v8	down-regulated
GO:0005985	7.95658e-05	0.999986	11	39	sucrose metabolic process	BP	0.00398847	0v8	down-regulated
GO:0019752	8.75776e-05	0.99998	14	54	carboxylic acid metabolic process	BP	0.00429311	0v8	down-regulated
GO:0042128	9.10362e-05	0.999994	6	11	nitrate assimilation	BP	0.00440692	0v8	down-regulated
GO:0009073	9.17529e-05	0.999988	9	24	aromatic amino acid family biosynthetic process	BP	0.00440692	0v8	down-regulated
GO:0006891	9.6273e-05	0.999989	8	22	intra-Golgi vesicle-mediated transport	BP	0.00457778	0v8	down-regulated
GO:0010115	9.84704e-05	0.999997	5	7	regulation of abscisic acid biosynthetic process	BP	0.00461815	0v8	down-regulated
GO:0009423	9.90645e-05	0.999991	7	15	chorismate biosynthetic process	BP	0.00461815	0v8	down-regulated
GO:0035999	0.000102076	0.999991	7	15	tetrahydrofolate interconversion	BP	0.00471234	0v8	down-regulated
GO:0046835	0.000116492	0.999992	6	12	carbohydrate phosphorylation	BP	0.00526702	0v8	down-regulated
GO:0019318	0.000122887	0.999988	7	16	hexose metabolic process	BP	0.00546101	0v8	down-regulated
GO:0015689	0.000125689	0.999992	6	11	molybdate ion transport	BP	0.00548302	0v8	down-regulated
GO:0071555	0.000130259	0.99994	37	233	cell wall organization	BP	0.00563072	0v8	down-regulated
GO:0080024	0.000136959	1	3	3	indolebutyric acid metabolic process	BP	0.00581466	0v8	down-regulated
GO:0080026	0.000136959	1	3	3	response to indolebutyric acid	BP	0.00581466	0v8	down-regulated
GO:0010466	0.000149637	0.99999	6	11	negative regulation of peptidase activity	BP	0.0060814	0v8	down-regulated
GO:0045944	0.000178535	0.999944	18	102	positive regulation of transcription by RNA polymerase II	BP	0.00713388	0v8	down-regulated
GO:0008652	0.000190102	0.999952	14	60	amino acid biosynthetic process	BP	0.00751832	0v8	down-regulated
GO:0006890	0.000220794	0.999943	14	59	retrograde vesicle-mediated transport, Golgi to endoplasmic reticulum	BP	0.00820216	0v8	down-regulated
GO:0006457	0.000226987	0.999889	40	279	protein folding	BP	0.00836686	0v8	down-regulated
GO:0035494	0.000259291	1	3	3	SNARE complex disassembly	BP	0.00927013	0v8	down-regulated
GO:0006544	0.000382051	1	3	3	glycine metabolic process	BP	0.0126157	0v8	down-regulated
GO:0042744	0.000395818	0.999833	27	156	hydrogen peroxide catabolic process	BP	0.0129801	0v8	down-regulated
GO:0006605	0.000402241	0.999961	6	15	protein targeting	BP	0.0131004	0v8	down-regulated
GO:0046396	0.000409924	1	3	3	D-galacturonate metabolic process	BP	0.0131702	0v8	down-regulated
GO:0042773	0.00041562	1	3	3	ATP synthesis coupled electron transport	BP	0.0132636	0v8	down-regulated
GO:0006631	0.000434778	0.999871	15	75	fatty acid metabolic process	BP	0.0136912	0v8	down-regulated
GO:0006084	0.000479705	0.999984	4	6	acetyl-CoA metabolic process	BP	0.0145933	0v8	down-regulated
GO:0010142	0.000479705	0.999984	4	6	farnesyl diphosphate biosynthetic process, mevalonate pathway	BP	0.0145933	0v8	down-regulated
GO:0010052	0.000501114	0.999968	5	9	guard cell differentiation	BP	0.0149861	0v8	down-regulated
GO:0006679	0.00052468	1	3	3	glucosylceramide biosynthetic process	BP	0.015496	0v8	down-regulated
GO:1901918	0.000535941	1	3	3	negative regulation of exoribonuclease activity	BP	0.0156392	0v8	down-regulated
GO:0006546	0.000540485	0.999982	4	6	glycine catabolic process	BP	0.0156392	0v8	down-regulated
GO:0006659	0.000555842	0.999981	4	6	phosphatidylserine biosynthetic process	BP	0.0156392	0v8	down-regulated
GO:0010155	0.000566592	1	3	3	regulation of proton transport	BP	0.0158479	0v8	down-regulated
GO:0005978	0.00059657	0.999916	7	23	glycogen biosynthetic process	BP	0.0163971	0v8	down-regulated
GO:0006007	0.000612225	1	3	3	glucose catabolic process	BP	0.0165207	0v8	down-regulated
GO:0071461	0.00062372	1	3	3	cellular response to redox state	BP	0.0165207	0v8	down-regulated
GO:0071482	0.00062372	1	3	3	cellular response to light stimulus	BP	0.0165207	0v8	down-regulated
GO:0050687	0.000649801	1	3	3	negative regulation of defense response to virus	BP	0.0166433	0v8	down-regulated
GO:0018160	0.000662208	1	3	3	peptidyl-pyrromethane cofactor linkage	BP	0.0166603	0v8	down-regulated
GO:0045595	0.000683038	1	3	3	regulation of cell differentiation	BP	0.0170493	0v8	down-regulated
GO:0010028	0.000702295	0.999974	4	6	xanthophyll cycle	BP	0.0171252	0v8	down-regulated
GO:0019346	0.000728059	0.999946	5	10	transsulfuration	BP	0.0174844	0v8	down-regulated
GO:0006090	0.000733543	0.99994	5	12	pyruvate metabolic process	BP	0.0175276	0v8	down-regulated
GO:0008152	0.00073892	0.999728	19	110	metabolic process	BP	0.0175678	0v8	down-regulated
GO:0019464	0.000792104	0.99997	4	6	glycine decarboxylation via glycine cleavage system	BP	0.018463	0v8	down-regulated
GO:0006002	0.000807351	0.999819	10	40	fructose 6-phosphate metabolic process	BP	0.0187266	0v8	down-regulated
GO:0006011	0.000869186	0.999986	3	4	UDP-glucose metabolic process	BP	0.0199661	0v8	down-regulated
GO:0006779	0.000963727	0.999802	9	33	porphyrin-containing compound biosynthetic process	BP	0.0219125	0v8	down-regulated
GO:0046274	0.000976962	0.999886	6	15	lignin catabolic process	BP	0.0219125	0v8	down-regulated
GO:0030388	0.00112167	0.99983	7	20	fructose 1,6-bisphosphate metabolic process	BP	0.024923	0v8	down-regulated
GO:0045039	0.00124223	0.999736	9	33	protein insertion into mitochondrial inner membrane	BP	0.0273463	0v8	down-regulated
GO:0009739	0.00128749	0.999761	8	26	response to gibberellin	BP	0.0280827	0v8	down-regulated
GO:0001732	0.00143437	0.999621	11	47	formation of cytoplasmic translation initiation complex	BP	0.0311436	0v8	down-regulated
GO:0006012	0.0014732	0.999714	8	29	galactose metabolic process	BP	0.0318413	0v8	down-regulated
GO:0042549	0.0017025	0.999904	4	7	photosystem II stabilization	BP	0.0356626	0v8	down-regulated
GO:0017157	0.00184816	0.999961	3	4	regulation of exocytosis	BP	0.0382052	0v8	down-regulated
GO:0080005	0.00188013	0.99996	3	4	photosystem stoichiometry adjustment	BP	0.0382052	0v8	down-regulated
GO:0032544	0.00212227	0.999777	5	12	plastid translation	BP	0.0429421	0v8	down-regulated
GO:0009651	0.00227261	0.99896	24	156	response to salt stress	BP	0.0454045	0v8	down-regulated
GO:0006572	0.00234531	0.999946	3	4	tyrosine catabolic process	BP	0.0464665	0v8	down-regulated
GO:1902000	0.00234531	0.999946	3	4	homogentisate catabolic process	BP	0.0464665	0v8	down-regulated
GO:0009749	0.0024066	0.999637	6	19	response to glucose	BP	0.0467076	0v8	down-regulated
GO:0006556	0.00248057	0.999729	5	12	S-adenosylmethionine biosynthetic process	BP	0.0477536	0v8	down-regulated
GO:0046622	0.00260048	0.999938	3	4	positive regulation of organ growth	BP	0.0490476	0v8	down-regulated
GO:0009067	0.00262	1	2	2	aspartate family amino acid biosynthetic process	BP	0.0490476	0v8	down-regulated
GO:0035195	0.00262	1	2	2	miRNA-mediated post-transcriptional gene silencing	BP	0.0490476	0v8	down-regulated
GO:0046688	0.00262	1	2	2	response to copper ion	BP	0.0490476	0v8	down-regulated
GO:0071457	0.00262	1	2	2	cellular response to ozone	BP	0.0490476	0v8	down-regulated
GO:0071484	0.00262	1	2	2	cellular response to light intensity	BP	0.0490476	0v8	down-regulated
GO:0071493	0.00262	1	2	2	cellular response to UV-B	BP	0.0490476	0v8	down-regulated
GO:0006351	6.21226e-10	1	106	814	DNA-templated transcription	BP	4.92322e-07	0v8	up-regulated
GO:0006355	1.69827e-07	1	217	2240	regulation of DNA-templated transcription	BP	7.97377e-05	0v8	up-regulated
GO:0006260	1.12063e-06	1	37	217	DNA replication	BP	0.000413698	0v8	up-regulated
GO:1904668	2.96904e-06	1	9	20	positive regulation of ubiquitin protein ligase activity	BP	0.000830457	0v8	up-regulated
GO:0051783	9.21084e-06	1	5	6	regulation of nuclear division	BP	0.00218988	0v8	up-regulated
GO:1904667	9.21084e-06	1	5	6	negative regulation of ubiquitin protein ligase activity	BP	0.00218988	0v8	up-regulated
GO:0006310	1.08261e-05	0.999997	19	84	DNA recombination	BP	0.00245134	0v8	up-regulated
GO:0007275	1.35251e-05	0.999996	23	126	multicellular organism development	BP	0.00279617	0v8	up-regulated
GO:0006281	5.46438e-05	0.999973	47	347	DNA repair	BP	0.00962338	0v8	up-regulated
GO:0034605	7.26728e-05	0.999992	8	22	cellular response to heat	BP	0.0123414	0v8	up-regulated
GO:0006334	8.07504e-05	0.999967	30	214	nucleosome assembly	BP	0.0132403	0v8	up-regulated
GO:0050821	8.60442e-05	0.999992	7	17	protein stabilization	BP	0.013638	0v8	up-regulated
GO:0006457	0.000105205	0.999951	38	279	protein folding	BP	0.0161371	0v8	up-regulated
GO:0009955	0.000310666	1	3	3	adaxial/abaxial pattern specification	BP	0.0433747	0v8	up-regulated
GO:0006511	0.000399295	0.999794	42	342	ubiquitin-dependent protein catabolic process	BP	0.0463084	0v8	up-regulated
GO:0006412	3.48365e-129	1	231	898	translation	BP	4.14728e-126	0v16	down-regulated
GO:0006334	8.53826e-78	1	103	215	nucleosome assembly	BP	5.80846e-75	0v16	down-regulated
GO:0009414	3.89905e-64	1	87	203	response to water deprivation	BP	1.68794e-61	0v16	down-regulated
GO:0002181	9.47279e-27	1	30	61	cytoplasmic translation	BP	1.96128e-24	0v16	down-regulated
GO:0000028	1.23087e-17	1	17	29	ribosomal small subunit assembly	BP	2.25439e-15	0v16	down-regulated
GO:0000470	3.22658e-12	1	13	29	maturation of LSU-rRNA	BP	4.51911e-10	0v16	down-regulated
GO:0042254	3.94644e-12	1	20	88	ribosome biogenesis	BP	5.36942e-10	0v16	down-regulated
GO:0051603	1.56186e-11	1	19	86	proteolysis involved in protein catabolic process	BP	2.06599e-09	0v16	down-regulated
GO:0000027	1.84507e-09	1	11	31	ribosomal large subunit assembly	BP	2.04331e-07	0v16	down-regulated
GO:0033962	3.97344e-09	1	7	10	P-body assembly	BP	4.20479e-07	0v16	down-regulated
GO:0008380	7.63782e-09	1	16	85	RNA splicing	BP	7.57735e-07	0v16	down-regulated
GO:0001732	2.15306e-08	1	12	48	formation of cytoplasmic translation initiation complex	BP	2.01036e-06	0v16	down-regulated
GO:0000387	1.02503e-07	1	9	27	spliceosomal snRNP assembly	BP	8.56349e-06	0v16	down-regulated
GO:0006099	1.59101e-07	1	14	92	tricarboxylic acid cycle	BP	1.30627e-05	0v16	down-regulated
GO:0042273	4.87272e-07	1	8	23	ribosomal large subunit biogenesis	BP	3.80391e-05	0v16	down-regulated
GO:0030490	5.4293e-07	1	6	10	maturation of SSU-rRNA	BP	4.17005e-05	0v16	down-regulated
GO:0006120	7.9581e-07	1	6	12	mitochondrial electron transport, NADH to ubiquinone	BP	5.74189e-05	0v16	down-regulated
GO:0000956	8.6724e-07	1	7	17	nuclear-transcribed mRNA catabolic process	BP	6.07323e-05	0v16	down-regulated
GO:0000463	2.10568e-06	1	7	20	maturation of LSU-rRNA from tricistronic rRNA transcript (SSU-rRNA, 5.8S rRNA, LSU-rRNA)	BP	0.000141229	0v16	down-regulated
GO:0002183	3.33105e-06	1	6	15	cytoplasmic translational initiation	BP	0.000217294	0v16	down-regulated
GO:0006564	5.05001e-06	1	6	15	L-serine biosynthetic process	BP	0.000324975	0v16	down-regulated
GO:0010628	6.9405e-06	1	5	11	positive regulation of gene expression	BP	0.000434877	0v16	down-regulated
GO:0010582	7.15592e-06	1	4	6	floral meristem determinacy	BP	0.000442552	0v16	down-regulated
GO:0006413	7.45421e-06	0.999999	14	111	translational initiation	BP	0.000455089	0v16	down-regulated
GO:0006364	1.04301e-05	0.999997	17	171	rRNA processing	BP	0.000605711	0v16	down-regulated
GO:1901800	1.86189e-05	0.999999	6	20	positive regulation of proteasomal protein catabolic process	BP	0.00103097	0v16	down-regulated
GO:0001522	1.88972e-05	0.999997	10	70	pseudouridine synthesis	BP	0.00103435	0v16	down-regulated
GO:0043161	3.85699e-05	0.999995	9	59	proteasome-mediated ubiquitin-dependent protein catabolic process	BP	0.00197859	0v16	down-regulated
GO:0006397	5.70412e-05	0.999985	15	180	mRNA processing	BP	0.00280031	0v16	down-regulated
GO:0006457	5.91468e-05	0.99998	21	275	protein folding	BP	0.00287405	0v16	down-regulated
GO:0006396	6.84744e-05	0.999981	16	218	RNA processing	BP	0.00329369	0v16	down-regulated
GO:0070534	9.62215e-05	0.999994	5	17	protein K63-linked ubiquitination	BP	0.00444861	0v16	down-regulated
GO:0045944	0.000108709	0.999979	10	108	positive regulation of transcription by RNA polymerase II	BP	0.00493019	0v16	down-regulated
GO:0006301	0.000112629	0.999993	5	16	postreplication repair	BP	0.00505979	0v16	down-regulated
GO:0006122	0.000118283	0.999993	5	15	mitochondrial electron transport, ubiquinol to cytochrome c	BP	0.0052154	0v16	down-regulated
GO:0019346	0.000155786	0.999994	4	10	transsulfuration	BP	0.00668337	0v16	down-regulated
GO:0000462	0.000165598	0.999984	6	24	maturation of SSU-rRNA from tricistronic rRNA transcript (SSU-rRNA, 5.8S rRNA, LSU-rRNA)	BP	0.00704087	0v16	down-regulated
GO:0044571	0.000180364	0.999998	3	4	[2Fe-2S] cluster assembly	BP	0.00760081	0v16	down-regulated
GO:0015986	0.000244016	0.999962	8	47	proton motive force-driven ATP synthesis	BP	0.0101044	0v16	down-regulated
GO:0019752	0.000259762	0.999958	8	55	carboxylic acid metabolic process	BP	0.0106214	0v16	down-regulated
GO:0006850	0.000261313	0.999989	4	10	mitochondrial pyruvate transmembrane transport	BP	0.0106214	0v16	down-regulated
GO:0006565	0.000269885	0.999996	3	5	L-serine catabolic process	BP	0.0106214	0v16	down-regulated
GO:0046653	0.000269885	0.999996	3	5	tetrahydrofolate metabolic process	BP	0.0106214	0v16	down-regulated
GO:0046655	0.000269885	0.999996	3	5	folic acid metabolic process	BP	0.0106214	0v16	down-regulated
GO:0019264	0.000380045	0.999981	4	12	glycine biosynthetic process from serine	BP	0.0139213	0v16	down-regulated
GO:0009060	0.000402416	0.999979	4	12	aerobic respiration	BP	0.0144222	0v16	down-regulated
GO:0080037	0.000413894	0.999991	3	6	negative regulation of cytokinin-activated signaling pathway	BP	0.0145997	0v16	down-regulated
GO:0000398	0.000472364	0.999844	16	201	mRNA splicing, via spliceosome	BP	0.0165397	0v16	down-regulated
GO:0006811	0.000544057	0.999852	12	151	monoatomic ion transport	BP	0.0189109	0v16	down-regulated
GO:0045039	0.000590334	0.999926	6	33	protein insertion into mitochondrial inner membrane	BP	0.0200798	0v16	down-regulated
GO:0032981	0.000806049	0.999918	5	25	mitochondrial respiratory chain complex I assembly	BP	0.0264718	0v16	down-regulated
GO:0035999	0.000900049	0.999939	4	15	tetrahydrofolate interconversion	BP	0.0291567	0v16	down-regulated
GO:0045899	0.000934465	1	2	2	positive regulation of RNA polymerase II transcription preinitiation complex assembly	BP	0.030067	0v16	down-regulated
GO:0010254	0.000960837	1	2	2	nectary development	BP	0.0303684	0v16	down-regulated
GO:0018002	0.000975718	1	2	2	N-terminal peptidyl-glutamic acid acetylation	BP	0.0303684	0v16	down-regulated
GO:2000012	0.00116828	0.999954	3	10	regulation of auxin polar transport	BP	0.0347709	0v16	down-regulated
GO:0010093	0.00117655	1	2	2	specification of floral organ identity	BP	0.0347995	0v16	down-regulated
GO:0010446	0.00138163	0.99999	2	3	response to alkaline pH	BP	0.0398748	0v16	down-regulated
GO:1901698	0.00138163	0.99999	2	3	response to nitrogen compound	BP	0.0398748	0v16	down-regulated
GO:0060267	0.00140081	1	2	2	positive regulation of respiratory burst	BP	0.039944	0v16	down-regulated
GO:0009651	0.00153448	0.999503	13	155	response to salt stress	BP	0.043333	0v16	down-regulated
GO:0006168	0.00154696	0.999935	3	9	adenine salvage	BP	0.043333	0v16	down-regulated
GO:0000724	0.00160049	0.999696	7	65	double-strand break repair via homologous recombination	BP	0.0445703	0v16	down-regulated
GO:0030163	0.00166573	0.999734	6	48	protein catabolic process	BP	0.0461175	0v16	down-regulated
GO:0009765	1.08343e-26	1	30	76	photosynthesis, light harvesting	BP	5.15927e-23	0v16	up-regulated
GO:0009408	8.44958e-15	1	23	90	response to heat	BP	6.70615e-12	0v16	up-regulated
GO:0009768	1.12816e-14	1	13	24	photosynthesis, light harvesting in photosystem I	BP	7.67474e-12	0v16	up-regulated
GO:0006457	2.99896e-13	1	37	275	protein folding	BP	1.78513e-10	0v16	up-regulated
GO:0015979	1.77145e-10	1	26	198	photosynthesis	BP	7.66876e-08	0v16	up-regulated
GO:0009416	2.21786e-07	1	13	72	response to light stimulus	BP	6.2126e-05	0v16	up-regulated
GO:0006751	3.82929e-06	1	6	15	glutathione catabolic process	BP	0.000959741	0v16	up-regulated
GO:0050821	0.000112382	0.999993	5	16	protein stabilization	BP	0.0184518	0v16	up-regulated
GO:0006412	1.8476e-35	1	191	896	translation	BP	4.40099e-32	0v24	down-regulated
GO:0006811	8.60961e-12	1	33	150	monoatomic ion transport	BP	2.92973e-09	0v24	down-regulated
GO:1902600	1.27939e-10	1	24	88	proton transmembrane transport	BP	3.80938e-08	0v24	down-regulated
GO:0045944	5.1401e-10	1	23	103	positive regulation of transcription by RNA polymerase II	BP	1.44044e-07	0v24	down-regulated
GO:0006099	1.06552e-09	1	23	92	tricarboxylic acid cycle	BP	2.82008e-07	0v24	down-regulated
GO:0015986	7.50104e-09	1	18	48	proton motive force-driven ATP synthesis	BP	1.78675e-06	0v24	down-regulated
GO:0051603	1.80012e-08	1	23	87	proteolysis involved in protein catabolic process	BP	3.17621e-06	0v24	down-regulated
GO:0032981	2.35725e-08	1	12	25	mitochondrial respiratory chain complex I assembly	BP	4.01069e-06	0v24	down-regulated
GO:0006122	2.50692e-08	1	10	15	mitochondrial electron transport, ubiquinol to cytochrome c	BP	4.11826e-06	0v24	down-regulated
GO:0005975	6.01661e-08	1	101	911	carbohydrate metabolic process	BP	8.95722e-06	0v24	down-regulated
GO:0006086	9.64198e-08	1	10	20	acetyl-CoA biosynthetic process from pyruvate	BP	1.31241e-05	0v24	down-regulated
GO:0006120	2.85013e-07	1	8	12	mitochondrial electron transport, NADH to ubiquinone	BP	3.23286e-05	0v24	down-regulated
GO:0046686	5.58809e-06	0.999999	17	78	response to cadmium ion	BP	0.000502295	0v24	down-regulated
GO:0009060	9.25851e-06	1	7	12	aerobic respiration	BP	0.000773817	0v24	down-regulated
GO:0002181	1.01749e-05	0.999998	17	61	cytoplasmic translation	BP	0.000835742	0v24	down-regulated
GO:0000209	1.12056e-05	0.999998	13	49	protein polyubiquitination	BP	0.000904806	0v24	down-regulated
GO:0019752	1.23567e-05	0.999998	14	55	carboxylic acid metabolic process	BP	0.000981122	0v24	down-regulated
GO:0006633	3.54237e-05	0.999987	27	166	fatty acid biosynthetic process	BP	0.00255695	0v24	down-regulated
GO:0009306	3.67404e-05	0.999996	8	20	protein secretion	BP	0.0026124	0v24	down-regulated
GO:0043161	4.12143e-05	0.999991	13	59	proteasome-mediated ubiquitin-dependent protein catabolic process	BP	0.0027952	0v24	down-regulated
GO:0006850	4.13771e-05	0.999998	6	10	mitochondrial pyruvate transmembrane transport	BP	0.0027952	0v24	down-regulated
GO:0015031	4.45133e-05	0.999979	45	376	protein transport	BP	0.0029453	0v24	down-regulated
GO:0006888	4.72763e-05	0.999987	17	96	endoplasmic reticulum to Golgi vesicle-mediated transport	BP	0.00308527	0v24	down-regulated
GO:0046034	5.19453e-05	0.999996	6	16	ATP metabolic process	BP	0.00329957	0v24	down-regulated
GO:0009409	6.2442e-05	0.999981	19	100	response to cold	BP	0.00381377	0v24	down-regulated
GO:0006544	7.80973e-05	1	3	3	glycine metabolic process	BP	0.00465069	0v24	down-regulated
GO:0006098	0.000102964	0.999983	10	35	pentose-phosphate shunt	BP	0.00583954	0v24	down-regulated
GO:0022900	0.000112966	0.999974	13	56	electron transport chain	BP	0.00633143	0v24	down-regulated
GO:0010498	0.000125748	0.999984	8	23	proteasomal protein catabolic process	BP	0.00696588	0v24	down-regulated
GO:0006102	0.000164568	0.999991	5	11	isocitrate metabolic process	BP	0.00871114	0v24	down-regulated
GO:0006546	0.00020403	0.999995	4	6	glycine catabolic process	BP	0.0104516	0v24	down-regulated
GO:0055085	0.000229117	0.999847	109	1284	transmembrane transport	BP	0.0114896	0v24	down-regulated
GO:0010206	0.00026785	0.999977	6	13	photosystem II repair	BP	0.0130467	0v24	down-regulated
GO:0015976	0.000366036	0.999986	4	7	carbon utilization	BP	0.01693	0v24	down-regulated
GO:0006995	0.000383311	0.99996	6	19	cellular response to nitrogen starvation	BP	0.0175586	0v24	down-regulated
GO:0016192	0.000428303	0.999797	33	298	vesicle-mediated transport	BP	0.0194327	0v24	down-regulated
GO:0019310	0.000437925	1	3	3	inositol catabolic process	BP	0.0194979	0v24	down-regulated
GO:0015990	0.000473008	1	3	3	electron transport coupled proton transport	BP	0.020301	0v24	down-regulated
GO:0006081	0.000496966	0.99996	5	14	cellular aldehyde metabolic process	BP	0.0209517	0v24	down-regulated
GO:0009651	0.000599453	0.999757	23	154	response to salt stress	BP	0.0239983	0v24	down-regulated
GO:0006979	0.000717603	0.999647	34	254	response to oxidative stress	BP	0.027881	0v24	down-regulated
GO:0006108	0.00104322	0.999831	7	28	malate metabolic process	BP	0.0379383	0v24	down-regulated
GO:0017157	0.0012285	0.999978	3	4	regulation of exocytosis	BP	0.0440042	0v24	down-regulated
GO:0006572	0.00126184	0.999977	3	4	tyrosine catabolic process	BP	0.0445288	0v24	down-regulated
GO:1902000	0.00126184	0.999977	3	4	homogentisate catabolic process	BP	0.0445288	0v24	down-regulated
GO:0006890	0.0013932	0.999623	11	59	retrograde vesicle-mediated transport, Golgi to endoplasmic reticulum	BP	0.0488029	0v24	down-regulated
GO:0009735	0.00144135	0.999614	11	52	response to cytokinin	BP	0.0496613	0v24	down-regulated
GO:0006662	0.00144578	0.999589	12	53	glycerol ether metabolic process	BP	0.0496613	0v24	down-regulated
GO:0034605	3.08785e-08	1	11	22	cellular response to heat	BP	1.6345e-05	0v24	up-regulated
GO:0050821	5.03035e-05	0.999996	7	17	protein stabilization	BP	0.0171176	0v24	up-regulated
GO:0006396	5.79065e-05	0.999973	44	218	RNA processing	BP	0.0183911	0v24	up-regulated
GO:0000398	0.000195547	0.999916	30	201	mRNA splicing, via spliceosome	BP	0.0443611	0v24	up-regulated

## Sheet: Table S7
Table S7. Main effect BR DEGs timepoint 0 only
GeneID	baseMean	log2FoldChange	log2FoldChange SE	stat	p-value	p-adjusted	annotated
TraesCS3A02G069900	2818.27	0.449435	0.132369	3.3953	0.000685522	0.0227028	CHR11/17
TraesCS3B02G083400	5441.04	0.446013	0.130308	3.42276	0.000619884	0.0217108	CHR11/17
TraesCS3D02G068900	5174.95	0.453728	0.127714	3.55269	0.00038132	0.0167872	CHR11/17
TraesCS3A02G328300	144.513	-0.522482	0.157184	-3.32402	0.000887299	0.0260556	GO: “response to heat”, “cellular response to heat”, or “heat acclimation”
TraesCS5B02G408300	353.533	-0.819362	0.268162	-3.05548	0.00224704	0.0416437	GO: “response to heat”, “cellular response to heat”, or “heat acclimation”
TraesCS6A02G041700	732.696	-1.02123	0.242757	-4.20678	2.59036e-05	0.00490128	GO: “response to heat”, “cellular response to heat”, or “heat acclimation”
TraesCS6D02G048300	1392.17	-1.34654	0.236173	-5.70147	1.18776e-08	7.25091e-05	GO: “response to heat”, “cellular response to heat”, or “heat acclimation”
TraesCS1B02G322100	247.587	-1.07643	0.289082	-3.72361	0.000196398	0.0124242	GO: “response to heat”, “cellular response to heat”, or “heat acclimation”
TraesCS2A02G497600	720.015	0.405112	0.123547	3.27902	0.00104168	0.0283509	GO: “response to heat”, “cellular response to heat”, or “heat acclimation”
TraesCS2B02G525800	763.749	0.350984	0.118256	2.968	0.00299744	0.0484368	GO: “response to heat”, “cellular response to heat”, or “heat acclimation”
TraesCS7A02G178900	64.6307	7.60372	1.92104	3.95813	7.55376e-05	0.00775736	Histone H4
TraesCS7D02G181000	918.448	7.2691	1.67183	4.34799	1.37392e-05	0.0034786	Histone H4 TH011
TraesCS3B02G308100	99.4745	0.579928	0.176164	3.29197	0.000994887	0.0276206	HOT1, GO: “response to heat”, “cellular response to heat”, or “heat acclimation”
TraesCS7A02G246500	151.852	1.64107	0.253273	6.47944	9.20615e-11	1.68601e-06	SPL17
TraesCS1A02G000200	328.203	-0.749675	0.22969	-3.26386	0.00109906	0.0290311
TraesCS1A02G005900	325.79	-0.502027	0.15368	-3.26671	0.00108804	0.0288392
TraesCS1A02G015400	823.748	-0.746999	0.200117	-3.73281	0.000189357	0.0124004
TraesCS1A02G019000	1520.97	-0.334887	0.112997	-2.96369	0.00303974	0.0487334
TraesCS1A02G020500	10626.6	-0.418018	0.125044	-3.34297	0.000828864	0.0250492
TraesCS1A02G025200	408.908	-0.719618	0.234385	-3.07024	0.00213889	0.0406204
TraesCS1A02G030000	107.642	-0.946511	0.292022	-3.24124	0.00119013	0.0300772
TraesCS1A02G030100	788.37	-0.420946	0.130082	-3.236	0.00121218	0.0304247
TraesCS1A02G037300	24.3207	-2.12503	0.584114	-3.63804	0.000274726	0.0142671
TraesCS1A02G046100	313.618	0.515147	0.130718	3.94091	8.11725e-05	0.00799244
TraesCS1A02G049600	543.376	-0.944229	0.260549	-3.624	0.000290082	0.0147886
TraesCS1A02G062100	1289.87	-0.391526	0.131977	-2.96661	0.00301102	0.0485247
TraesCS1A02G064100	1186.38	-0.317472	0.101339	-3.13276	0.00173168	0.0364669
TraesCS1A02G069400	362.163	-0.439904	0.134982	-3.25897	0.00111816	0.0292984
TraesCS1A02G070700	19.1038	-2.2367	0.751465	-2.97645	0.00291604	0.0476967
TraesCS1A02G075000	1959.37	-0.594612	0.18337	-3.24269	0.00118409	0.030017
TraesCS1A02G077700	737.257	-0.665443	0.202931	-3.27915	0.00104119	0.0283509
TraesCS1A02G078900	23.9151	-1.59931	0.465439	-3.43614	0.00059007	0.0211755
TraesCS1A02G083100	71.5795	-1.13493	0.310357	-3.65687	0.000255314	0.0136987
TraesCS1A02G084200	366.173	-0.304552	0.0952339	-3.19794	0.00138412	0.0322952
TraesCS1A02G087900	391.557	0.452471	0.123531	3.66282	0.000249451	0.0135428
TraesCS1A02G094500	20.9743	1.30892	0.402684	3.25049	0.00115205	0.0297152
TraesCS1A02G094700	601.546	-0.605524	0.191091	-3.16878	0.00153081	0.0340067
TraesCS1A02G105900	61.6316	-0.750536	0.223063	-3.36469	0.000766302	0.0240997
TraesCS1A02G108000	69.1916	0.654663	0.219339	2.9847	0.00283854	0.0470279
TraesCS1A02G111800	177.374	-0.657758	0.179287	-3.66875	0.000243739	0.0133781
TraesCS1A02G113900	277.662	-0.336521	0.107372	-3.13418	0.00172338	0.0364047
TraesCS1A02G119500	115.1	-0.908695	0.236946	-3.83503	0.00012555	0.0100848
TraesCS1A02G123100	730.457	-0.491025	0.158602	-3.09595	0.00196182	0.038926
TraesCS1A02G124600	4762.5	-0.295164	0.0826487	-3.57131	0.000355204	0.0162894
TraesCS1A02G125700	132.633	-0.717227	0.219451	-3.26827	0.00108206	0.0288175
TraesCS1A02G126400	122.725	-0.961466	0.284006	-3.38537	0.00071082	0.0230815
TraesCS1A02G126900	890.424	-0.423888	0.125179	-3.38626	0.000708524	0.0230614
TraesCS1A02G129400	6419.98	0.525399	0.135341	3.88204	0.000103584	0.009273
TraesCS1A02G130700	1607.65	0.399084	0.132911	3.00264	0.00267649	0.0456477
TraesCS1A02G132300	13.9111	1.9036	0.55944	3.40269	0.000667264	0.0225211
TraesCS1A02G132400	12359.6	0.37392	0.112225	3.33189	0.00086257	0.0255771
TraesCS1A02G133100	2305.04	-0.289306	0.0785511	-3.68302	0.000230485	0.0131244
TraesCS1A02G134000	568.995	-0.447238	0.144737	-3.09	0.00200154	0.0393383
TraesCS1A02G135600	168.496	1.25789	0.314294	4.00227	6.27367e-05	0.00726629
TraesCS1A02G136000	319.311	0.367602	0.12011	3.06054	0.00220938	0.0413446
TraesCS1A02G139100	726.532	-0.231127	0.0759304	-3.04393	0.00233507	0.0425698
TraesCS1A02G142000	294.648	-0.444188	0.117307	-3.78653	0.000152766	0.011191
TraesCS1A02G143700	838.53	0.475775	0.145017	3.28081	0.00103508	0.0283071
TraesCS1A02G149700	130.151	0.870459	0.187151	4.65109	3.30181e-06	0.00151697
TraesCS1A02G150900	1639.75	-1.12658	0.208494	-5.40341	6.53844e-08	0.000163289
TraesCS1A02G152100	676.561	-0.244883	0.0822225	-2.9783	0.0028985	0.0475371
TraesCS1A02G153100	711.241	0.33557	0.103713	3.23558	0.00121397	0.0304379
TraesCS1A02G156100	841.77	-0.812585	0.166523	-4.87973	1.06231e-06	0.000845874
TraesCS1A02G157900	367.625	-0.710769	0.201021	-3.53579	0.000406564	0.0174582
TraesCS1A02G163900	645.776	0.260615	0.0876587	2.97307	0.00294839	0.0479545
TraesCS1A02G175200	461.475	-1.10716	0.257058	-4.30703	1.65464e-05	0.00381972
TraesCS1A02G177000	277.232	-0.597492	0.167233	-3.57281	0.000353167	0.0162374
TraesCS1A02G179000	5392.51	-0.301569	0.0959614	-3.14261	0.00167449	0.0358394
TraesCS1A02G182400	2245.08	-0.238501	0.0786203	-3.03358	0.00241668	0.0434513
TraesCS1A02G185100	85.7634	-1.05009	0.28488	-3.68606	0.000227751	0.013089
TraesCS1A02G188900	239.651	-0.465484	0.146351	-3.1806	0.00146969	0.0334082
TraesCS1A02G190400	4391.9	0.428693	0.138555	3.09404	0.00197453	0.0390795
TraesCS1A02G190900	2317.17	0.348546	0.112924	3.08655	0.00202492	0.0396059
TraesCS1A02G194900	256.615	-0.8109	0.201929	-4.01577	5.92522e-05	0.00708355
TraesCS1A02G195700	368.977	-0.289062	0.0938516	-3.07999	0.00207005	0.0400891
TraesCS1A02G196000	1057.03	0.487489	0.141317	3.44961	0.000561404	0.0208129
TraesCS1A02G197600	825.661	-0.3497	0.100427	-3.48215	0.000497411	0.019526
TraesCS1A02G197700	56.8867	-0.818151	0.273488	-2.99154	0.00277574	0.0465237
TraesCS1A02G200000	69.7539	-0.637159	0.209751	-3.03769	0.00238398	0.0431
TraesCS1A02G200200	198.586	-0.57245	0.184388	-3.10459	0.0019054	0.0384877
TraesCS1A02G200800	286.449	-0.36105	0.106862	-3.37867	0.000728377	0.02343
TraesCS1A02G201700	94.5109	-0.701681	0.222193	-3.15798	0.00158868	0.0348583
TraesCS1A02G204600	16.6347	1.3531	0.349656	3.86981	0.000108919	0.00949141
TraesCS1A02G209700	13.2845	-2.18584	0.652393	-3.3505	0.000806668	0.0246496
TraesCS1A02G217400	1557.35	0.430851	0.0980027	4.39632	1.101e-05	0.00316884
TraesCS1A02G221000	1087.59	-0.434319	0.143121	-3.03463	0.00240833	0.0433548
TraesCS1A02G221600	937.681	-0.583848	0.151923	-3.84304	0.000121518	0.00996486
TraesCS1A02G222700	26.9425	-1.24867	0.338535	-3.68846	0.000225612	0.0130653
TraesCS1A02G225700	16.5245	-1.83617	0.496594	-3.69754	0.000217701	0.0127793
TraesCS1A02G227700	978.123	0.45696	0.118665	3.85085	0.000117707	0.00986592
TraesCS1A02G229000	17829.2	0.402356	0.132705	3.03195	0.00242977	0.0435693
TraesCS1A02G230400	1544.06	-0.506904	0.163765	-3.09531	0.00196609	0.0389404
TraesCS1A02G232800	281.516	0.676922	0.199043	3.40089	0.000671665	0.0225644
TraesCS1A02G236300	40.8861	-1.068	0.325583	-3.28026	0.00103711	0.0283071
TraesCS1A02G241800	52.7917	-0.742662	0.236567	-3.13934	0.00169332	0.0360458
TraesCS1A02G241900	855.649	-0.356122	0.112961	-3.15261	0.00161818	0.0352661
TraesCS1A02G242800	164.398	0.545979	0.180683	3.02176	0.00251313	0.0442085
TraesCS1A02G248300	90.1383	-0.760751	0.232757	-3.26843	0.00108145	0.0288152
TraesCS1A02G249100	1334.05	0.4617	0.135963	3.39577	0.000684348	0.0226912
TraesCS1A02G249500	275.673	-1.0298	0.23788	-4.32906	1.49745e-05	0.00360776
TraesCS1A02G256800	1384.89	0.527391	0.158124	3.3353	0.000852064	0.0254328
TraesCS1A02G257400	253.998	-1.08874	0.194673	-5.59268	2.23595e-08	9.44983e-05
TraesCS1A02G258500	3250.75	0.583949	0.170152	3.43193	0.000599304	0.021358
TraesCS1A02G260500	6805.81	0.412204	0.122187	3.37355	0.00074206	0.0237174
TraesCS1A02G264000	8516.66	0.491917	0.147049	3.34526	0.000822048	0.0249392
TraesCS1A02G264800	535.015	0.705414	0.153518	4.59499	4.32771e-06	0.00187223
TraesCS1A02G268400	988.99	-0.994702	0.329602	-3.01788	0.00254546	0.0445378
TraesCS1A02G268800	49.4528	-1.54658	0.321265	-4.81403	1.47917e-06	0.000991077
TraesCS1A02G270000	191.101	-1.65396	0.334195	-4.94909	7.45624e-07	0.000724719
TraesCS1A02G275000	101.97	-0.998768	0.256384	-3.89559	9.79609e-05	0.00900028
TraesCS1A02G279200	703.285	0.411282	0.139519	2.94786	0.00319981	0.0499444
TraesCS1A02G279500	777.819	-0.442803	0.150053	-2.95098	0.00316763	0.0498074
TraesCS1A02G280900	1146.72	0.514396	0.148013	3.47534	0.000510215	0.019802
TraesCS1A02G281100	800.408	0.311388	0.100006	3.11369	0.00184764	0.0377654
TraesCS1A02G284300	1200.93	0.430108	0.14123	3.04544	0.00232337	0.0425503
TraesCS1A02G288400	2695.63	0.257525	0.0812007	3.17147	0.00151671	0.0338469
TraesCS1A02G295900	38.7366	-1.0891	0.342095	-3.18362	0.00145445	0.0332405
TraesCS1A02G299500	9425.47	0.465061	0.1335	3.4836	0.00049472	0.0194619
TraesCS1A02G300200	491.891	-0.6508	0.207688	-3.13354	0.00172709	0.0364131
TraesCS1A02G301800	729.308	-0.493062	0.111381	-4.42681	9.56354e-06	0.0028596
TraesCS1A02G302300	157.603	-1.31614	0.282794	-4.65406	3.25463e-06	0.00151697
TraesCS1A02G302700	176.624	0.577564	0.164327	3.51472	0.000440225	0.0182404
TraesCS1A02G303100	104.201	-1.60926	0.410297	-3.92217	8.77544e-05	0.00841431
TraesCS1A02G304700	207.513	0.505368	0.140719	3.59132	0.000329014	0.0156325
TraesCS1A02G306300	434.214	0.268415	0.08702	3.08452	0.00203881	0.0397785
TraesCS1A02G306400	1026.05	0.405536	0.118882	3.41124	0.000646681	0.0221923
TraesCS1A02G310500	529.44	-0.546377	0.166794	-3.27575	0.00105382	0.0285241
TraesCS1A02G311100	39.7147	-1.80053	0.48583	-3.7061	0.000210478	0.0126597
TraesCS1A02G314100	2335.98	0.574008	0.164555	3.48825	0.000486196	0.019315
TraesCS1A02G314200	149.058	0.722191	0.203208	3.55395	0.000379485	0.0167524
TraesCS1A02G314400	241.7	0.520973	0.113823	4.57704	4.71595e-06	0.00193483
TraesCS1A02G320500	1069	-0.547262	0.158774	-3.4468	0.000567268	0.0208794
TraesCS1A02G321100	172.702	-2.32649	0.329207	-7.06695	1.58378e-12	4.3508e-08
TraesCS1A02G321700	122.831	-1.22572	0.220643	-5.55521	2.77276e-08	0.000101561
TraesCS1A02G322700	454.826	0.329308	0.106845	3.08209	0.00205549	0.0399621
TraesCS1A02G325800	46.0094	0.984451	0.292072	3.37057	0.000750119	0.0238226
TraesCS1A02G327000	595.321	0.377474	0.109902	3.43464	0.000593342	0.0212651
TraesCS1A02G328700	822.002	0.289571	0.093043	3.11223	0.00185679	0.0378818
TraesCS1A02G329600	510.99	0.470198	0.132938	3.53697	0.000404752	0.0174242
TraesCS1A02G331300	49.4282	-1.05299	0.356934	-2.9501	0.00317668	0.0498436
TraesCS1A02G331800	280.284	-0.316873	0.105307	-3.00903	0.0026208	0.0451811
TraesCS1A02G332300	14.4093	-1.33787	0.448857	-2.98063	0.0028766	0.0473333
TraesCS1A02G332800	40.3799	-1.05433	0.350981	-3.00396	0.00266489	0.0455977
TraesCS1A02G333600	1333.18	0.34142	0.0927152	3.68246	0.000230995	0.0131244
TraesCS1A02G334900	727.328	0.565688	0.150655	3.75487	0.000173431	0.0120763
TraesCS1A02G336300	89.5393	0.916943	0.257648	3.5589	0.000372406	0.0166127
TraesCS1A02G339400	166.991	-1.76163	0.579232	-3.04133	0.00235538	0.0427093
TraesCS1A02G339500	1388.1	0.350287	0.0839817	4.17099	3.0328e-05	0.00527304
TraesCS1A02G340500	542.094	0.765383	0.192934	3.96706	7.27641e-05	0.0075931
TraesCS1A02G340900	348.767	0.406846	0.101672	4.00156	6.29259e-05	0.00726629
TraesCS1A02G341300	6546.28	-0.528485	0.151689	-3.48401	0.000493956	0.0194619
TraesCS1A02G341500	123.302	0.629709	0.169082	3.72429	0.000195869	0.0124242
TraesCS1A02G346600	563	-0.390486	0.121081	-3.22499	0.00125978	0.0309002
TraesCS1A02G348500	709.902	-0.304214	0.0957292	-3.17786	0.00148368	0.0335791
TraesCS1A02G360200	23806.5	0.44473	0.129423	3.43625	0.00058983	0.0211755
TraesCS1A02G360700	1087.55	0.789159	0.229865	3.43314	0.000596627	0.0213133
TraesCS1A02G361600	23280.1	0.408286	0.132925	3.07156	0.00212944	0.040578
TraesCS1A02G365200	3085.28	0.624143	0.190394	3.27816	0.00104485	0.0284188
TraesCS1A02G366900	24.4653	1.08627	0.325431	3.33794	0.000844014	0.0253398
TraesCS1A02G368000	9737.07	0.391802	0.13069	2.99794	0.00271809	0.0459499
TraesCS1A02G380700	598.581	0.3729	0.113199	3.2942	0.000987025	0.0275554
TraesCS1A02G381500	69.7889	-0.748596	0.243932	-3.06887	0.00214873	0.0406808
TraesCS1A02G392100	50.9222	-1.43194	0.435304	-3.28952	0.00100358	0.0277637
TraesCS1A02G400500	542.737	-0.636888	0.165439	-3.84969	0.000118266	0.00986592
TraesCS1A02G408700	505.136	0.236245	0.0785466	3.0077	0.0026323	0.0453225
TraesCS1A02G409600	887.452	0.498764	0.137678	3.62269	0.000291556	0.014791
TraesCS1A02G410300	475.947	-0.326246	0.0932608	-3.49821	0.0004684	0.0187949
TraesCS1A02G411600	1499.01	0.524188	0.138547	3.78348	0.000154653	0.0112393
TraesCS1A02G415800	393.025	0.71592	0.170892	4.18932	2.79788e-05	0.00512047
TraesCS1A02G416700	30.746	-1.55412	0.389578	-3.98924	6.62863e-05	0.00743245
TraesCS1A02G423100	627.945	-0.700936	0.184722	-3.79455	0.000147912	0.0110116
TraesCS1A02G423400	68.2214	1.18195	0.277665	4.25673	2.07436e-05	0.00440256
TraesCS1A02G424300	587.142	-0.538402	0.133812	-4.02357	5.73214e-05	0.00705184
TraesCS1A02G434300	73.7883	1.82678	0.440713	4.14506	3.39721e-05	0.00553095
TraesCS1A02G444300	1343.34	-0.407085	0.114408	-3.55819	0.000373424	0.0166127
TraesCS1B02G003100	48.9947	0.975975	0.311897	3.12916	0.00175309	0.0367348
TraesCS1B02G007800	607.631	0.206443	0.0698478	2.95561	0.00312054	0.0493946
TraesCS1B02G007900	2240.17	0.48083	0.14558	3.30286	0.000957049	0.0271743
TraesCS1B02G022800	2553.91	-0.247869	0.0725739	-3.4154	0.00063688	0.0220488
TraesCS1B02G047800	13.5099	-2.19195	0.743144	-2.94957	0.00318217	0.0498815
TraesCS1B02G054900	556.55	0.498671	0.166016	3.00375	0.00266673	0.0456035
TraesCS1B02G056500	98.6757	0.543007	0.183136	2.96504	0.0030264	0.048636
TraesCS1B02G059500	284.056	0.571088	0.18109	3.15361	0.00161262	0.0352182
TraesCS1B02G064800	65.788	-1.34252	0.308186	-4.3562	1.32338e-05	0.0034235
TraesCS1B02G079000	1535.98	0.303747	0.0990375	3.06699	0.00216227	0.0408245
TraesCS1B02G083800	183.536	0.443817	0.143488	3.09306	0.00198107	0.0390972
TraesCS1B02G087500	76.0523	0.766809	0.246092	3.11595	0.00183354	0.0376718
TraesCS1B02G087900	75.7015	0.593121	0.200338	2.96061	0.00307035	0.0489385
TraesCS1B02G093600	1559.05	-0.567274	0.17501	-3.24138	0.00118954	0.0300764
TraesCS1B02G095900	558.445	0.741971	0.213413	3.47669	0.000507645	0.0197669
TraesCS1B02G097200	885.17	-0.472946	0.0835455	-5.66093	1.50551e-08	7.5196e-05
TraesCS1B02G097400	414.797	-0.744313	0.202536	-3.67497	0.000237882	0.0132398
TraesCS1B02G100400	569.505	-0.487106	0.138455	-3.51817	0.000434539	0.0181555
TraesCS1B02G100600	82.085	-1.05096	0.320196	-3.28225	0.00102981	0.028236
TraesCS1B02G102400	33.9445	-1.05218	0.323725	-3.25024	0.00115309	0.0297152
TraesCS1B02G105100	1366.61	0.235651	0.0711615	3.3115	0.000927969	0.0266826
TraesCS1B02G126100	3828.59	-0.265806	0.0830726	-3.19968	0.00137579	0.0321791
TraesCS1B02G128400	909.709	-0.318516	0.082272	-3.8715	0.000108166	0.00949017
TraesCS1B02G136000	533.041	0.51028	0.145106	3.51661	0.000437098	0.0181794
TraesCS1B02G137700	299.817	-0.669114	0.212413	-3.15005	0.00163241	0.0354077
TraesCS1B02G143500	363.02	-0.412317	0.121303	-3.39906	0.000676173	0.0225701
TraesCS1B02G146200	6555.95	0.535296	0.153652	3.48381	0.000494329	0.0194619
TraesCS1B02G147700	760.275	-0.381818	0.108303	-3.52548	0.000422722	0.0178793
TraesCS1B02G151300	2146.31	-0.340542	0.0679188	-5.01396	5.33202e-07	0.000584569
TraesCS1B02G154500	8000.76	0.35881	0.113361	3.16519	0.00154981	0.0342612
TraesCS1B02G156600	1478.27	0.462304	0.140954	3.27981	0.00103876	0.0283093
TraesCS1B02G159500	249.732	0.418006	0.139792	2.9902	0.00278798	0.0466294
TraesCS1B02G161100	763.362	0.561336	0.15296	3.66983	0.000242714	0.0133486
TraesCS1B02G161300	1201.66	-0.245936	0.0815587	-3.01545	0.00256598	0.044713
TraesCS1B02G161800	146.608	0.483361	0.162507	2.97441	0.00293555	0.0478306
TraesCS1B02G168500	645.969	-1.49441	0.493128	-3.03047	0.00244172	0.0437131
TraesCS1B02G169500	564.77	-0.566621	0.156289	-3.62547	0.000288433	0.0147552
TraesCS1B02G171800	302.059	0.52252	0.124022	4.21312	2.51869e-05	0.0048709
TraesCS1B02G186300	3275.07	-0.348347	0.106194	-3.2803	0.00103696	0.0283071
TraesCS1B02G188400	38.5383	-1.39161	0.471707	-2.95015	0.00317615	0.0498436
TraesCS1B02G192500	3922.29	0.448341	0.149883	2.99128	0.00277811	0.0465358
TraesCS1B02G193000	93.8134	-1.51004	0.305891	-4.93652	7.95284e-07	0.000734303
TraesCS1B02G195800	328.571	-0.763756	0.205656	-3.71375	0.000204208	0.0125374
TraesCS1B02G196200	1237.08	0.48985	0.159178	3.07738	0.00208831	0.0402213
TraesCS1B02G196600	176.701	-0.504761	0.155227	-3.25176	0.00114693	0.029654
TraesCS1B02G203200	166.405	-0.899641	0.226549	-3.97106	7.15533e-05	0.0075931
TraesCS1B02G204600	68.9581	0.673065	0.227123	2.96344	0.00304223	0.0487449
TraesCS1B02G206100	2613.45	0.283005	0.0884044	3.20125	0.0013683	0.0320586
TraesCS1B02G209700	243.047	-0.736891	0.125431	-5.87487	4.23185e-09	3.88784e-05
TraesCS1B02G210600	1295.03	0.477359	0.136392	3.4999	0.000465425	0.0187282
TraesCS1B02G212800	414.946	0.258966	0.084465	3.06595	0.00216976	0.0409378
TraesCS1B02G213800	21.4046	-1.54693	0.455567	-3.39561	0.00068476	0.0226912
TraesCS1B02G213900	1225.26	0.574779	0.181729	3.16284	0.00156238	0.0344325
TraesCS1B02G217300	50.2728	-0.951188	0.306499	-3.1034	0.00191313	0.0385458
TraesCS1B02G218300	1956.62	-0.301812	0.0964463	-3.12933	0.00175206	0.0367271
TraesCS1B02G220700	329.285	-0.332888	0.11282	-2.9506	0.00317162	0.0498216
TraesCS1B02G221400	725.254	0.364479	0.115221	3.16331	0.00155984	0.0343902
TraesCS1B02G223200	55.3284	0.930244	0.308826	3.01219	0.00259369	0.0449559
TraesCS1B02G225500	21.7518	-1.0671	0.352978	-3.02313	0.00250178	0.0441205
TraesCS1B02G226400	96.0733	-0.851583	0.262558	-3.24341	0.00118106	0.0299861
TraesCS1B02G230100	164.694	-1.1703	0.303744	-3.85291	0.000116723	0.00986592
TraesCS1B02G230600	908.899	0.487724	0.134841	3.61703	0.000298	0.0149628
TraesCS1B02G232000	258.189	0.327251	0.100865	3.24445	0.00117677	0.0299402
TraesCS1B02G232600	121.874	0.643347	0.204955	3.13897	0.00169542	0.0360766
TraesCS1B02G232700	242.365	0.510886	0.149558	3.41598	0.000635527	0.0220297
TraesCS1B02G234800	1582.24	-0.541793	0.134434	-4.03017	5.57356e-05	0.0069596
TraesCS1B02G235100	361.055	-0.521703	0.144688	-3.6057	0.000311311	0.0152119
TraesCS1B02G242000	1159.47	0.401045	0.125872	3.18613	0.0014419	0.0330637
TraesCS1B02G243400	307.229	-0.300432	0.0981757	-3.06015	0.00221228	0.0413707
TraesCS1B02G245200	15357.7	0.384446	0.127057	3.02577	0.00248	0.0439536
TraesCS1B02G245900	369.246	0.501992	0.154546	3.24818	0.00116146	0.0298192
TraesCS1B02G249400	298	0.474804	0.152737	3.10863	0.00187955	0.0381761
TraesCS1B02G249600	23.7661	1.00031	0.2893	3.45768	0.00054484	0.0204179
TraesCS1B02G253200	134.539	0.637768	0.209995	3.03707	0.00238891	0.0431322
TraesCS1B02G253500	1226.56	-0.33818	0.0981259	-3.44639	0.000568131	0.0208794
TraesCS1B02G254000	590.256	-0.403532	0.125156	-3.22423	0.00126313	0.0309264
TraesCS1B02G254300	195.666	0.598707	0.198015	3.02355	0.00249828	0.0441059
TraesCS1B02G255700	786.628	-0.301497	0.09824	-3.06898	0.00214788	0.0406808
TraesCS1B02G259800	1175.54	0.405853	0.134735	3.01224	0.00259331	0.0449559
TraesCS1B02G260300	153.647	-0.887183	0.277216	-3.20033	0.00137269	0.0321339
TraesCS1B02G260400	977.333	-0.263931	0.0829653	-3.18122	0.00146655	0.0333703
TraesCS1B02G261800	610.925	-0.360188	0.117137	-3.07493	0.00210554	0.0403578
TraesCS1B02G267200	976.028	0.585634	0.160345	3.65234	0.000259858	0.0137925
TraesCS1B02G267800	139.722	-0.544161	0.164994	-3.29806	0.000973547	0.0274307
TraesCS1B02G269100	4410.7	0.728218	0.208075	3.49979	0.000465631	0.0187282
TraesCS1B02G271100	5506.72	0.423728	0.129005	3.28459	0.0010213	0.0280701
TraesCS1B02G272800	1604.89	0.261949	0.0888525	2.94813	0.003197	0.0499444
TraesCS1B02G274600	9101.33	0.503095	0.1488	3.38101	0.000722211	0.0233136
TraesCS1B02G275500	645.953	0.472648	0.126954	3.72298	0.000196882	0.0124242
TraesCS1B02G279500	710.723	0.389976	0.112267	3.47366	0.000513415	0.0198509
TraesCS1B02G284300	70.8269	-1.3108	0.416377	-3.14811	0.00164328	0.0355314
TraesCS1B02G287800	155.784	-1.02328	0.336063	-3.04489	0.00232762	0.0425698
TraesCS1B02G289900	755.624	0.726281	0.202706	3.58292	0.000339773	0.015901
TraesCS1B02G291500	1144.11	-0.675175	0.208106	-3.24438	0.00117707	0.0299402
TraesCS1B02G296400	65.1878	-3.59772	0.995021	-3.61573	0.000299505	0.0149628
TraesCS1B02G302100	246.54	0.426338	0.142958	2.98226	0.00286129	0.0472227
TraesCS1B02G304300	52.6741	1.04209	0.260666	3.9978	6.39332e-05	0.00728759
TraesCS1B02G308900	301.504	-0.767252	0.248018	-3.09354	0.00197785	0.0390972
TraesCS1B02G309000	122.277	-1.21021	0.360324	-3.35866	0.00078321	0.0244169
TraesCS1B02G309300	9411.32	0.417972	0.139632	2.99338	0.00275904	0.0463428
TraesCS1B02G310100	91.3134	-0.811816	0.263976	-3.07534	0.00210264	0.0403504
TraesCS1B02G311200	226.335	-0.467013	0.154128	-3.03003	0.0024453	0.0437336
TraesCS1B02G311800	391.513	-0.449026	0.133205	-3.37093	0.000749142	0.0238205
TraesCS1B02G312100	1532.74	-0.675638	0.168971	-3.99855	6.37306e-05	0.00728759
TraesCS1B02G312400	82.4394	-1.51554	0.453721	-3.34024	0.000837046	0.0251995
TraesCS1B02G313700	1328.16	0.2891	0.0961091	3.00804	0.00262937	0.0452871
TraesCS1B02G315300	135.372	0.726492	0.16714	4.34661	1.38259e-05	0.00348451
TraesCS1B02G317200	1210.63	0.469187	0.152477	3.07709	0.00209029	0.0402213
TraesCS1B02G317500	13.9057	-1.81906	0.499688	-3.64039	0.000272221	0.0141901
TraesCS1B02G317800	88.5532	-0.908311	0.303234	-2.99541	0.00274075	0.0461767
TraesCS1B02G320900	932.343	0.468911	0.140131	3.34623	0.000819197	0.0248877
TraesCS1B02G321000	320.543	0.50323	0.14331	3.51147	0.000445634	0.0183103
TraesCS1B02G325100	866.368	-0.425952	0.129102	-3.29935	0.000969098	0.0273503
TraesCS1B02G326100	240.667	0.315242	0.105808	2.97937	0.00288838	0.047442
TraesCS1B02G326400	2451.02	0.500608	0.150829	3.31904	0.000903287	0.0263368
TraesCS1B02G326500	58.8815	1.28032	0.294881	4.34181	1.41314e-05	0.00348769
TraesCS1B02G327300	303.462	0.334853	0.0953433	3.51207	0.000444623	0.0183103
TraesCS1B02G332700	660.075	-0.849147	0.188429	-4.50644	6.59229e-06	0.00237714
TraesCS1B02G333800	55.8951	-1.62481	0.412134	-3.94244	8.06555e-05	0.0079701
TraesCS1B02G340400	500.04	0.384407	0.111544	3.44624	0.000568446	0.0208794
TraesCS1B02G347000	1607.99	0.386943	0.12042	3.21328	0.00131227	0.0314841
TraesCS1B02G347900	871.554	0.520227	0.170011	3.05995	0.00221372	0.0413836
TraesCS1B02G353400	399.183	0.795115	0.215635	3.68732	0.000226625	0.0130653
TraesCS1B02G354000	4729.69	-0.730607	0.176094	-4.14897	3.33972e-05	0.00551725
TraesCS1B02G375000	181.757	0.51424	0.170535	3.01545	0.00256596	0.044713
TraesCS1B02G376300	15086.8	0.394533	0.130483	3.02365	0.00249749	0.0441059
TraesCS1B02G377100	259.285	0.870719	0.233473	3.72942	0.000191921	0.0124004
TraesCS1B02G377800	1209.32	0.322034	0.0765658	4.20598	2.59953e-05	0.00490128
TraesCS1B02G378900	745.787	0.233887	0.0723007	3.23493	0.00121674	0.0304379
TraesCS1B02G382700	3188.69	0.632556	0.18039	3.50659	0.000453881	0.018472
TraesCS1B02G384600	126.028	0.618456	0.181496	3.40754	0.000655502	0.0223371
TraesCS1B02G386400	21171.7	0.409945	0.133264	3.07618	0.00209669	0.0402929
TraesCS1B02G390900	540.293	0.268583	0.0830408	3.23435	0.00121921	0.0304379
TraesCS1B02G403000	781.476	0.379477	0.1133	3.34931	0.000810129	0.0247063
TraesCS1B02G408600	2150.6	0.266004	0.0775646	3.42945	0.000604798	0.0214103
TraesCS1B02G414300	525.237	0.419531	0.140377	2.9886	0.00280263	0.0467261
TraesCS1B02G416600	4977.16	0.387549	0.130187	2.97686	0.00291213	0.0476753
TraesCS1B02G420100	1575.61	-0.492129	0.12645	-3.8919	9.94617e-05	0.00906799
TraesCS1B02G420200	68.1341	-1.04039	0.327706	-3.17477	0.00149955	0.0336944
TraesCS1B02G428000	96.7861	0.795343	0.20022	3.97235	7.11667e-05	0.0075931
TraesCS1B02G429200	469.141	-0.557821	0.182531	-3.05603	0.00224287	0.0416222
TraesCS1B02G431500	842.16	-0.375323	0.116993	-3.20807	0.0013363	0.0317418
TraesCS1B02G436700	100.888	-0.833046	0.254331	-3.27545	0.00105495	0.0285241
TraesCS1B02G439600	1135.65	0.561065	0.139542	4.02074	5.80145e-05	0.00705184
TraesCS1B02G440200	319.23	-0.493787	0.100145	-4.93072	8.19273e-07	0.000734303
TraesCS1B02G441900	2601.9	0.435831	0.138679	3.14274	0.00167376	0.0358379
TraesCS1B02G446400	90.8723	-0.992234	0.222897	-4.45153	8.52603e-06	0.00267678
TraesCS1B02G449800	117.638	0.694227	0.186864	3.71514	0.000203089	0.0125372
TraesCS1B02G450400	600.437	0.290952	0.0903767	3.21932	0.00128495	0.0312188
TraesCS1B02G472200	651.196	0.629748	0.186042	3.38498	0.000711833	0.0230911
TraesCS1B02G473200	23.6415	1.36913	0.395602	3.46087	0.000538423	0.0203034
TraesCS1B02G476700	228.969	0.331621	0.108152	3.06625	0.0021676	0.040911
TraesCS1B02G478800	3788.61	-0.225531	0.0748072	-3.01484	0.00257117	0.044775
TraesCS1D02G002400	3250.05	0.425764	0.134278	3.17075	0.00152044	0.0339164
TraesCS1D02G010200	911.219	0.42823	0.131613	3.2537	0.00113911	0.0295787
TraesCS1D02G013300	636.675	-0.531461	0.139905	-3.79873	0.00014544	0.0108718
TraesCS1D02G016600	356.97	0.289321	0.0955402	3.02826	0.00245963	0.0437762
TraesCS1D02G025400	516.393	-0.563013	0.188874	-2.98089	0.00287416	0.0473333
TraesCS1D02G031900	1714.03	0.472264	0.153637	3.07389	0.00211286	0.0404335
TraesCS1D02G036700	296.304	0.496184	0.149838	3.31147	0.000928077	0.0266826
TraesCS1D02G038000	969.141	0.281056	0.0846046	3.322	0.000893752	0.0261891
TraesCS1D02G040100	1105.58	0.329602	0.0995907	3.30956	0.000934412	0.0267968
TraesCS1D02G042900	616.876	0.550859	0.15032	3.66457	0.000247756	0.0134954
TraesCS1D02G046700	234.971	0.631987	0.173168	3.64957	0.000262678	0.0138582
TraesCS1D02G059700	963.166	0.396574	0.115622	3.42991	0.000603785	0.0213919
TraesCS1D02G061500	1563.7	0.293565	0.0963067	3.04823	0.00230195	0.0422942
TraesCS1D02G061600	674.84	0.308358	0.0855023	3.60642	0.000310447	0.0152019
TraesCS1D02G069800	26.1989	-1.03698	0.331722	-3.12606	0.00177165	0.0369825
TraesCS1D02G077600	2083.2	-0.637621	0.204348	-3.12027	0.00180687	0.0373695
TraesCS1D02G081200	2150.21	-0.455981	0.129936	-3.50927	0.000449335	0.0183823
TraesCS1D02G083900	319.093	-0.591745	0.18376	-3.22021	0.00128098	0.0311691
TraesCS1D02G084200	903.946	-0.424573	0.135788	-3.12674	0.00176755	0.0369483
TraesCS1D02G091100	265.61	0.460848	0.14456	3.18792	0.00143299	0.0329746
TraesCS1D02G095500	259.676	0.528858	0.170568	3.10057	0.00193147	0.0386618
TraesCS1D02G097400	891.912	0.303525	0.0961663	3.15625	0.00159812	0.0350236
TraesCS1D02G119100	829.842	-0.482751	0.136743	-3.53035	0.000415012	0.0176894
TraesCS1D02G124500	678.517	-0.194674	0.0633114	-3.07486	0.00210603	0.0403578
TraesCS1D02G125300	4273.83	0.518241	0.136441	3.79828	0.000145702	0.0108766
TraesCS1D02G125400	711.894	0.600489	0.165394	3.63066	0.000282692	0.014557
TraesCS1D02G125800	668.654	-0.49206	0.132147	-3.72359	0.000196408	0.0124242
TraesCS1D02G126300	878.845	-0.293373	0.0919082	-3.19203	0.00141277	0.0327099
TraesCS1D02G126400	158.889	0.678214	0.143866	4.71421	2.42655e-06	0.00132
TraesCS1D02G127800	55.0328	-0.88415	0.219316	-4.03139	5.54471e-05	0.00693935
TraesCS1D02G131600	400.665	0.486276	0.144391	3.36777	0.000757797	0.0239694
TraesCS1D02G131800	3277.59	-0.216886	0.0650819	-3.33252	0.000860645	0.0255598
TraesCS1D02G132800	614.822	-0.60338	0.184562	-3.26926	0.0010783	0.0288152
TraesCS1D02G132900	781.335	-0.216436	0.0720876	-3.0024	0.00267861	0.0456477
TraesCS1D02G137800	440.598	-0.311078	0.0881863	-3.52751	0.000419485	0.0177835
TraesCS1D02G138600	368.7	0.423077	0.118101	3.58232	0.000340554	0.015924
TraesCS1D02G139400	345.575	0.314588	0.103832	3.02978	0.00244729	0.04374
TraesCS1D02G141100	215.557	-0.52418	0.169552	-3.09155	0.00199111	0.0392099
[truncated: 3,154 more rows]

## Sheet: Table S8
Table S8. Putative wheat homologs of genes contributing to acquired thermotolerance in Arabidopsis
[truncated: 67 more rows]

[truncated: 1 more sheets: Table S9]
